# Supplementary material for: Fe-catalyzed highly selective ring expansion of alkynylcyclopropyl alkanols to cyclobutanols
Source: Royal Society of Chemistry journal article supplement (doi:10.1039/b916623h), 2009-01-01

# Fe-catalyzed Highly Selective Ring Expansion of Alkynylcyclopropyl Alkanols to Cyclobutanols: 1,2-Carbon Shift *Versus* 2,3- C-C Bond Cleavage

## Supporting Information

Anjun Chen,<sup>†,‡</sup> Riyuan Lin,<sup>†</sup> Qingjian Liu<sup>‡</sup> and Ning Jiao<sup>\*,†,§</sup>

<sup>†</sup>State Key Laboratory of Natural and Biomimetic Drugs, School of Pharmaceutical Sciences, Peking University, Xue Yuan Rd. 38, Beijing 100191, China,

<sup>‡</sup>Department of Chemistry, Shandong Normal University, Jinan 250014, China,

<sup>§</sup>State Key Laboratory of Organometallic Chemistry, Chinese Academy of Sciences, Shanghai 200032, China

E-mail: [jiaoning@bjmu.edu.cn](mailto:jiaoning@bjmu.edu.cn)

## Table of Contents

|                                                                       |     |
|-----------------------------------------------------------------------|-----|
| Screening with different catalysts, solvents and additives            | S2  |
| Analytical data for compounds <b>1</b> and <b>2</b>                   | S5  |
| <sup>1</sup> H NMR and <sup>13</sup> C NMR spectra of those compounds | S21 |

**Table S1.** Ring Expansion Reaction of **1a** catalyzed by other catalysts<sup>a</sup>

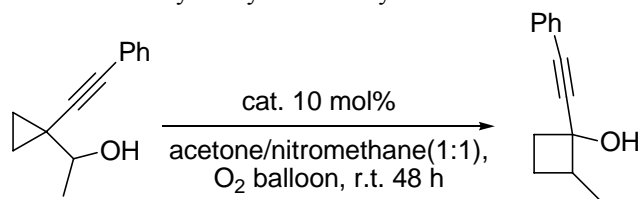

| Entry             | Catalyst(10%)                                        | Yield of <b>2a</b> (%) <sup>b</sup> |
|-------------------|------------------------------------------------------|-------------------------------------|
| 1                 | TsOH·H <sub>2</sub> O                                | Trace                               |
| 2                 | AgNO <sub>3</sub>                                    | Trace                               |
| 3                 | CuCl <sub>2</sub> ·2H <sub>2</sub> O                 | Trace                               |
| 4                 | AuCl <sub>3</sub>                                    | Trace                               |
| 5                 | PtCl <sub>4</sub>                                    | 0                                   |
| 6                 | Fe(NO <sub>3</sub> ) <sub>3</sub> ·9H <sub>2</sub> O | Trace                               |
| 7                 | S <sub>C</sub> (OTf) <sub>3</sub>                    | 5                                   |
| 8                 | AlCl <sub>3</sub>                                    | Trace                               |
| 9                 | HOAc                                                 | Trace                               |
| 10                | Cu(OTf) <sub>2</sub>                                 | 8                                   |
| 11                | IrCl <sub>3</sub>                                    | 7                                   |
| 12                | RhCl <sub>3</sub> ·3H <sub>2</sub> O                 | Trace                               |
| 13                | NiCl <sub>2</sub> ·6H <sub>2</sub> O                 | NR                                  |
| 14                | Ga(OTf) <sub>3</sub>                                 | 10                                  |
| 15                | InCl <sub>3</sub>                                    | NR                                  |
| 16                | Mn(OAc) <sub>2</sub> ·2H <sub>2</sub> O              | NR                                  |
| 17 <sup>c</sup>   | HCl                                                  | NR                                  |
| 18 <sup>c,d</sup> | FeCl <sub>3</sub>                                    | 6                                   |
| 19 <sup>e</sup>   | FeCl <sub>3</sub>                                    | 36                                  |
| 20                | FeBr <sub>2</sub>                                    | 43                                  |
| 21                | Fe(acac) <sub>2</sub>                                | Trace                               |
| 22                | Fe(OTf) <sub>3</sub>                                 | 15                                  |
| 23                | Fe(OAc) <sub>2</sub>                                 | NR                                  |
| 24                | FeCl <sub>3</sub> /4 ÅMS                             | NR                                  |
| 25                | Fe <sub>2</sub> (SO <sub>4</sub> ) <sub>3</sub>      | NR                                  |
| 26                | FeF <sub>3</sub>                                     | NR                                  |
| 27                | FeF <sub>2</sub>                                     | NR                                  |

<sup>a</sup> **1a** (37.2 mg, 0.2 mmol), 10 mol% catalyst, 2 mL solvent, under O<sub>2</sub> (1 atm). <sup>b</sup> Isolated yield. <sup>c</sup> The reaction was carried out in 2 mL nitromethane. <sup>d</sup> The reaction was carried out at 40 °C. <sup>e</sup> The reaction was carried out in 2 mL acetone.

**Table S2.** The effect of different additives in the FeCl<sub>2</sub> catalyzed ring expansion of **1a** to **2a**<sup>a</sup>

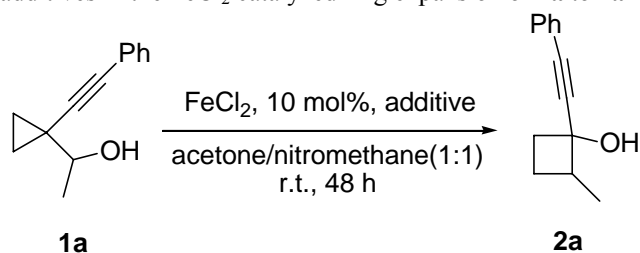

| Entry | additives (eq.)                         | Yield of <b>2a</b> (%) <sup>b</sup> |
|-------|-----------------------------------------|-------------------------------------|
| 1     | PhI(OAc) <sub>2</sub> (0.2)             | 7                                   |
| 2     | BQ (0.2)                                | 32                                  |
| 3     | AgBF <sub>4</sub> (0.2)                 | 10                                  |
| 4     | AgOTf (0.2)                             | 43                                  |
| 5     | AgClO <sub>4</sub> (0.2)                | 15                                  |
| 6     | AgNO <sub>3</sub> (0.2)                 | trace                               |
| 7     | <sup>t</sup> BuOO <sup>t</sup> Bu (3.0) | 38                                  |
| 8     | Bipyridine (0.2)                        | NR                                  |
| 9     | H <sub>2</sub> O <sub>2</sub> (1.0)     | 7                                   |
| 10    | 4-chlorobenzoperoxic acid (1.0)         | 6                                   |
| 11    | H <sub>2</sub> O (1.0)                  | trace                               |
| 12    | Hydroquinone (0.2)                      | 14                                  |

<sup>a</sup> **1a** (37.2 mmg, 0.2 mmol), 10 mol% catalyst, 2 mL acetone/nitromethane(1:1), under O<sub>2</sub>. <sup>b</sup> Isolated yield.

**Table S3.** The transformation of **1a** to **2a** in different solvents catalyzed by FeCl<sub>2</sub><sup>a</sup>

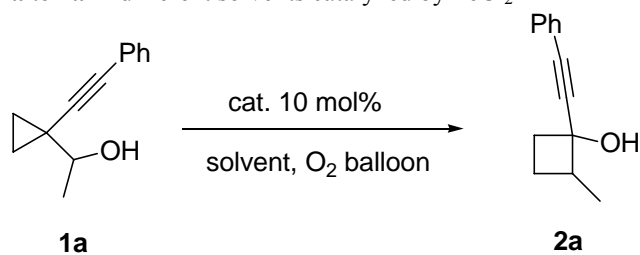

| Entry           | Solvent                         | T(°C)  | time(h) | yield (%) <sup>b</sup> |
|-----------------|---------------------------------|--------|---------|------------------------|
| 1               | CH <sub>3</sub> OH              | RT     | 24      | NR                     |
| 2               | CH <sub>3</sub> NO <sub>2</sub> | RT     | 16      | 22                     |
| 3               | DCM                             | RT     | 72      | 16                     |
| 4               | CH <sub>3</sub> CN              | RT     | 8       | NR                     |
| 5               | DMA                             | RT     | 8       | NR                     |
| 6               | Toluene                         | RT     | 24      | trace                  |
| 7               | H <sub>2</sub> O                | RT     | 8       | NR                     |
| 8               | THF                             | RT     | 8       | NR                     |
| 9               | DMF                             | RT     | 24      | NR                     |
| 10              | Dioxane                         | RT     | 24      | NR                     |
| 11              | CHCl <sub>3</sub>               | RT     | 24      | trace                  |
| 12 <sup>c</sup> | 2:1                             | RT     | 24      | 43                     |
| 13 <sup>c</sup> | 3:1                             | RT     | 48      | 32                     |
| 14 <sup>c</sup> | 10:1                            | RT     | 48      | 30                     |
| 15 <sup>c</sup> | 4:1                             | RT     | 48      | 30                     |
| 16              | Acetone                         | RT     | 23      | 40                     |
| 17              | Acetone                         | reflux | 40      | 6                      |
| 18 <sup>c</sup> | 1:1                             | 50     | 40      | 10                     |

<sup>a</sup> **1a** (37.2 mmg, 0.2 mmol), FeCl<sub>2</sub>, 10 mol%, 2 mL solvent, under O<sub>2</sub>. <sup>b</sup> Isolated yield. <sup>c</sup> Ratio of acetone/nitromethane.



## Experimental section

### General Remarks.

All manipulations were conducted with a standard Schlenk technique under oxygen atmosphere.  $^1\text{H}$ -NMR spectra were recorded on a JEOL AL-300 or Bruker AVIII-400 spectrometers. Chemical shifts (in ppm) were referenced to tetramethylsilane ( $\delta = 0$  ppm) in  $\text{CDCl}_3$  as an internal standard.  $^{13}\text{C}$ -NMR spectra were obtained by using the same NMR spectrometers and were calibrated with  $\text{CDCl}_3$  ( $\delta = 77.00$  ppm). Mass spectra were recorded using a PE SCLEX QSTAR spectrometer. Unless otherwise noted, materials obtained from commercial suppliers were used without further purification. Iron (II) chloride (anhydrous, 99.99 %) were purchased from Sream. Some spectra of *cis*-isomers were not obtained due to the less separated amount of *cis*-products.

Substrates **1** are synthesized according to literature procdurer<sup>1</sup>

### General producer for 1-(1-(Phenylethynyl)cyclopropyl) ethanol (**1a**):

To a solution of 1-cyclopropyl-2-phenylethyne (1.85 g, 13 mmol) in dry THF (100 mL) was added dropwise *n*-BuLi (2.5 M, 15 mmol) in hexane at 0 °C, The mixture was stirred for 1 h at rt before acetaldehyde was added. After 1 h, the reaction was quenched by addition of 50 mL of water. The mixture was neutralized with 1 N HCl and extracted with diethyl ether (3 x 50 mL). The combined organic layers were dried over  $\text{Na}_2\text{SO}_4$ . After filtration and evaporation, the crude product was purified by column chromatography on silica gel to afford 1.5 g (Yield 63%.) of **1a**.

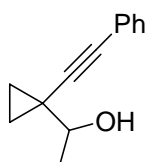

**1a**

1)

**1-(1-(Phenylethynyl)cyclopropyl) ethanol (1a)**: liquid;  $^1\text{H}$  NMR ( $\text{CDCl}_3$ , 300 MHz):  $\delta = 7.43$ - $7.38$ (m, 2 H),  $7.29$ - $7.25$  (m, 3 H),  $3.20$  (q,  $J = 6.6$  Hz, 1 H),  $1.90$  (brs, 1 H),  $1.42$  (d,  $J = 6.6$  Hz, 3 H),  $1.10$ - $0.98$  (m, 2 H),  $0.94$ - $0.89$  (m, 1 H),  $0.78$ - $0.73$  (m, 1 H);  $^{13}\text{C}$  NMR ( $\text{CDCl}_3$ , 75.4 MHz):  $\delta = 131.7$ ,  $128.2$ ,  $127.7$ ,  $123.5$ ,  $91.0$ ,  $79.3$ ,  $73.2$ ,  $21.1$ ,  $19.9$ ,  $14.3$ ,  $13.2$  ppm; MS (70 eV):  $m/z$  (%):  $186.2$  (6) [ $\text{M}^+$ ],  $144.1$  (100); IR (neat):  $\nu = 3419$ ,  $2958$ ,  $2927$ ,  $2866$ ,  $2206$ ,  $1716$ ,  $1598$ ,  $1491$ ,  $1446$ ,  $756.4$ ,  $692$   $\text{cm}^{-1}$ ; HRMS  $m/z$  (ESI) calcd for  $\text{C}_{13}\text{H}_{15}\text{O}$  ( $\text{M} + \text{H}$ )<sup>+</sup>:  $187.11174$ , found  $187.11143$ .

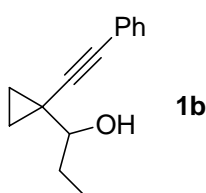

**1b**

2)

**1-(1-(Phenylethynyl)cyclopropyl) propanol (1b)**: liquid;  $^1\text{H}$  NMR ( $\text{CDCl}_3$ , 300 MHz):  $\delta = 7.40\text{-}7.37$  (m, 2 H),  $7.29\text{-}7.25$  (m, 3 H),  $2.8$  (q,  $J = 6.3$  Hz, 1 H),  $1.80\text{-}1.72$  (m, 2 H),  $1.69$  (d,  $J = 6.3$  Hz, 1 H),  $1.08\text{-}0.90$  (m, 5 H),  $0.91\text{-}0.78$  (m, 2 H);  $^{13}\text{C}$  NMR ( $\text{CDCl}_3$ , 75.4 MHz):  $\delta = 131.7, 128.1, 127.7, 123.5, 91.1, 79.1, 78.9, 28.9, 18.8, 13.9, 13.7, 10.5$  ppm; MS (70 eV):  $m/z$  (%):  $200.2$  (8) [ $\text{M}^+$ ],  $127.9$  (100); IR (neat):  $\nu = 3423, 2964, 2932, 2876, 2361, 2225, 1715, 1598, 1491, 1460, 975, 756, 692$   $\text{cm}^{-1}$ ; HRMS  $m/z$  (ESI) calcd for  $\text{C}_{14}\text{H}_{16}\text{ONa}$  ( $\text{M} + \text{Na}$ ) $^+$ :  $223.10934$ , found  $223.10859$ .

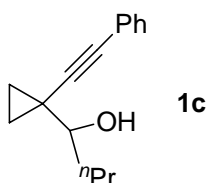

3)

**1-(1-(Phenylethynyl)cyclopropyl) butanol (1c)**: liquid;  $^1\text{H}$  NMR ( $\text{CDCl}_3$ , 300 MHz):  $\delta = 7.47\text{-}7.32$  (m, 2 H),  $7.28\text{-}7.26$  (m, 3 H),  $2.91$  (m, 1 H),  $1.81\text{-}1.74$  (m, 3 H),  $1.60\text{-}1.35$  (m, 2 H),  $1.10\text{-}1.02$  (m, 2 H),  $0.96$  (t,  $J = 7.2$  Hz, 3 H),  $0.91\text{-}0.84$  (m, 1 H),  $0.83\text{-}0.73$  (m, 1 H);  $^{13}\text{C}$  NMR ( $\text{CDCl}_3$ , 75.4 MHz):  $\delta = 131.7, 128.1, 127.7, 123.5, 91.1, 79.1, 77.2, 38.0, 19.2, 19.1, 14.1, 13.9, 13.8$  ppm; MS (70 eV):  $m/z$  (%):  $214.2$  (2) [ $\text{M}^+$ ],  $71.0$  (100); IR (neat):  $\nu = 3406, 2959, 2932, 2872, 2224, 1717, 1491, 1460, 1030, 756, 692$   $\text{cm}^{-1}$ ; HRMS  $m/z$  (ESI) calcd for  $\text{C}_{15}\text{H}_{18}\text{ONa}$  ( $\text{M} + \text{Na}$ ) $^+$ :  $237.12499$ , found  $237.12452$ .

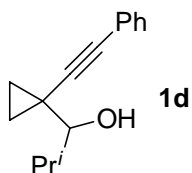

4)

**1-(1-(Phenylethynyl)cyclopropyl)-2-methyl propanol (1d)**: liquid;  $^1\text{H}$  NMR ( $\text{CDCl}_3$ , 300 MHz):  $\delta = 7.41\text{-}7.36$  (m, 2 H),  $7.28\text{-}7.24$  (m, 3 H),  $2.48$  (d,  $J = 8.4$  Hz, 1 H),  $2.20\text{-}2.03$  (m, 1 H),  $1.79$  (brs, 1 H),  $1.16\text{-}1.13$  (m, 1 H),  $1.08\text{-}1.00$  (m, 7 H),  $0.96\text{-}0.82$  (m, 2 H);  $^{13}\text{C}$  NMR ( $\text{CDCl}_3$ , 75.4 MHz):  $\delta = 131.7, 128.1, 127.6, 123.6, 91.3, 83.2, 78.8, 34.1, 19.5, 19.3, 18.0, 15.6, 13.4$  ppm; MS (70 eV):  $m/z$  (%):  $214.2$  (2) [ $\text{M}^+$ ],  $105.1$  (100); IR (neat):  $\nu = 3447, 2960, 2938, 2874, 2224, 1718, 1599, 1271, 1037, 756, 692$   $\text{cm}^{-1}$ ; HRMS  $m/z$  (ESI) calcd for  $\text{C}_{15}\text{H}_{18}\text{ONa}$  ( $\text{M} + \text{Na}$ ) $^+$ :  $237.12499$ , found  $237.1248$ .

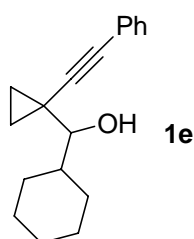

5)

**1-Cyclohexyl-(1-(phenylethynyl)cyclopropyl) methanol (1e):** solid, mp 42~44 °C (*n*-hexane/ethyl acetate); <sup>1</sup>H NMR (CDCl<sub>3</sub>, 300 MHz): δ = 7.43-7.35 (m, 2 H), 7.31-7.24 (m, 3 H), 2.55-2.47 (m, 1 H), 2.18-1.98 (m, 2 H), 1.90-1.56 (m, 6 H), 1.19-1.06 (m, 2 H), 1.04-0.98 (m, 1 H), 0.94-0.73 (m, 5 H); <sup>13</sup>C NMR (CDCl<sub>3</sub>, 75.4 MHz): δ = 131.7, 128.1, 127.6, 123.6, 91.3, 82.3, 78.3, 43.6, 29.7, 29.6, 26.5, 26.2, 25.9, 17.8, 15.5, 13.2 ppm; MS (70 eV): m/z (%): 254.3 (2) [M<sup>+</sup>], 43.1 (100); IR (neat): ν = 3401, 2927, 2953, 2853, 2225, 2007, 1710, 1449, 1032, 756, 692 cm<sup>-1</sup>; HRMS m/z (ESI) calcd for C<sub>18</sub>H<sub>22</sub>ONa (M + Na)<sup>+</sup>: 277.15629, found 277.15683.

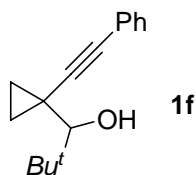

6)

**1-(1-(Phenylethynyl)cyclopropyl)-2,2-dimethyl propanol (1f):** liquid; <sup>1</sup>H NMR (CDCl<sub>3</sub>, 300 MHz): δ = 7.43-7.36 (m, 2 H), 7.31-7.24 (m, 3 H), 2.99 (m, 1 H), 1.92-1.1.62 (m, 2 H), 1.61-1.49 (m, 1 H), 1.09-1.00 (m, 2 H), 0.98-0.75 (m, 9 H); <sup>13</sup>C NMR (CDCl<sub>3</sub>, 75.4 MHz): δ = 131.7, 128.1, 127.7, 123.5, 91.2, 79.2, 75.4, 44.8, 24.4, 23.5, 22.0, 19.5, 14.2, 13.7 ppm; MS (70 eV): m/z (%): 228.1 (1) [M<sup>+</sup>], 158 (100); IR (neat): ν = 3395, 2956, 2928, 2870, 2222, 1708, 1598, 1491, 1466, 1071, 1030, 756, 692 cm<sup>-1</sup>; HRMS m/z (ESI) calcd for C<sub>16</sub>H<sub>21</sub>ONa (M + Na)<sup>+</sup>: 251.14064, found 251.14152.

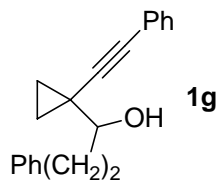

7)

**1-(1-(Phenylethynyl)cyclopropyl)-3-phenyl propanol (1g):** liquid; <sup>1</sup>H NMR (CDCl<sub>3</sub>, 300 MHz): δ = 7.42-7.29 (m, 2 H), 7.29-7.14 (m, 8 H), 2.99-2.68 (m, 3 H), 2.17-2.00 (m, 2 H), 1.78 (d, *J* = 4.2 Hz, 1 H), 1.10-1.00 (m, 2 H), 0.90-0.83 (m, 1 H), 0.80-0.71 (m, 1 H) <sup>13</sup>C NMR (CDCl<sub>3</sub>, 75.4 MHz): δ = 141.9, 131.7, 128.4, 128.1, 127.7, 125.8, 123.4, 91.0, 79.3, 76.6, 37.3, 32.1, 19.1, 14.0, 13.8 (one carbon missing as a result of overlap) ppm; MS (70 eV): m/z (%): 276.2 (6) [M<sup>+</sup>] 91.1 (100), IR (neat): ν = 3416, 3060, 3026, 2931, 2862, 2223, 1708, 1600, 1493, 1450, 1077, 1047, 952, 754, 696 cm<sup>-1</sup>; HRMS m/z (ESI) calcd for C<sub>20</sub>H<sub>20</sub>ONa (M + Na)<sup>+</sup>: 299.14064, found 299.14114.

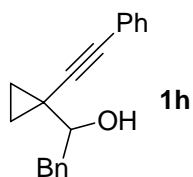

8)

**1-Benzyl-1-(1-(phenylethynyl)cyclopropyl) methanol (1h):** liquid;  $^1\text{H}$  NMR ( $\text{CDCl}_3$ , 300 MHz):  $\delta$  = 7.49-7.40 (m, 2 H), 7.35-7.18 (m, 8 H), 3.24-3.15 (m, 2 H), 3.09-2.98 (m, 1 H), 1.84 (brs, 1 H), 1.10-0.80 (m, 3 H), 0.66-0.57 (m, 1 H);  $^{13}\text{C}$  NMR ( $\text{CDCl}_3$ , 75.4 MHz):  $\delta$  = 138.3, 131.8, 129.5, 128.4, 128.2, 127.8, 126.4, 123.5, 91.2, 78.2, 77.2, 42.3, 18.5, 13.9, 13.7 ppm; MS (70 eV):  $m/z$  (%): 262.2 (10) [ $\text{M}^+$ ], 127.9 (100); IR (neat):  $\nu$  = 3448, 3060, 3028, 2924, 2856, 2220, 1952, 1725, 1600, 1493, 1449, 1267, 1077, 1032, 754, 698  $\text{cm}^{-1}$ ; HRMS  $m/z$  (ESI) calcd for  $\text{C}_{19}\text{H}_{18}\text{ONa}$  ( $\text{M} + \text{Na}$ ) $^+$ : 285.12499, found 285.12459.

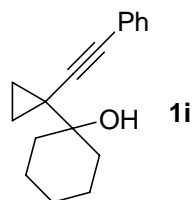

9)

**1-(1-(Phenylethynyl)cyclopropyl) cyclohexanol (1i):** liquid;  $^1\text{H}$  NMR ( $\text{CDCl}_3$ , 300 MHz):  $\delta$  = 7.42-7.30 (m, 2 H), 7.29-7.23 (m, 3 H), 1.90-1.76 (m, 2 H), 1.75-1.38 (m, 9 H), 1.05-0.95 (m, 2 H), 0.90-0.80 (m, 2 H);  $^{13}\text{C}$  NMR ( $\text{CDCl}_3$ , 75.4 MHz):  $\delta$  = 131.6, 128.1, 127.5, 123.8, 94.1, 77.9, 70.9, 37.5, 34.9, 25.7, 22.9, 22.7, 21.7, 11.1, 8.1 (one carbon missing as a result of overlap) ppm; MS (70 eV):  $m/z$  (%): 240 (1) [ $\text{M}^+$ ], 105 (100); IR (neat):  $\nu$  = 3456, 2934, 2856, 2221, 2010, 1598, 1491, 1445, 1145, 1060, 975, 930, 756, 692  $\text{cm}^{-1}$ ; HRMS  $m/z$  (ESI) calcd for  $\text{C}_{17}\text{H}_{20}\text{ONa}$  ( $\text{M} + \text{Na}$ ) $^+$ : 263.14064, found 263.1406.

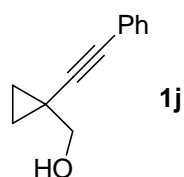

10)

**(1-(Phenylethynyl)cyclopropyl) methanol (1j):** liquid;  $^1\text{H}$  NMR ( $\text{CDCl}_3$ , 300 MHz):  $\delta$  = 7.50-7.33 (m, 2 H), 7.32-7.24 (m, 3 H), 3.57 (s, 2 H), 1.92 (brs, 1 H), 1.07-1.03 (m, 2 H), 0.92-0.82 (m, 2 H);  $^{13}\text{C}$  NMR ( $\text{CDCl}_3$ , 75.4 MHz):  $\delta$  = 131.7, 128.2, 127.8, 123.3, 92.2, 78.2, 68.8, 15.6, 13.6 ppm; MS (70 eV):  $m/z$  (%): 172.2 (12) [ $\text{M}^+$ ], 144.2 (100); IR (neat):  $\nu$  = 3424, 3083, 3061, 3025, 2930, 2862, 2223, 1709, 1493, 1453, 1077, 1045, 1033, 755, 696  $\text{cm}^{-1}$ ; HRMS  $m/z$  (ESI) calcd for  $\text{C}_{12}\text{H}_{13}\text{O}$  ( $\text{M} + \text{H}$ ) $^+$ : 173.09609, found 173.09665.

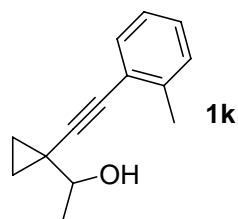

11)

**1-(1-(o-Tolyethynyl)cyclopropyl) ethanol (1k):** liquid;  $^1\text{H}$  NMR ( $\text{CDCl}_3$ , 300 MHz):  $\delta$  = 7.36 (d,  $J$  = 7.5 Hz, 1 H), 7.18-7.00 (m, 3 H), 3.21 (q,  $J$  = 6.3 Hz, 1 H), 2.42 (s, 3 H), 1.83 (brs, 1 H), 1.43 (d,  $J$  = 6.3

Hz, 3 H), 1.10-0.94 (m, 2 H), 0.93-0.85 (m, 1 H), 0.84-0.70 (m, 1 H);  $^{13}\text{C}$  NMR ( $\text{CDCl}_3$ , 75.4 MHz):  $\delta$  = 140.1, 131.8, 129.3, 127.7, 125.4, 123.2, 95.04, 78.2, 73.2, 21.2, 20.8, 20.1, 14.5, 13.4 ppm; MS (70 eV):  $m/z$  (%): 200.2 (53) [ $\text{M}^+$ ], 115.1 (100) IR (neat):  $\nu$  = 3345, 2959, 2866, 2220, 1740, 1720, 1486, 1454, 1377, 1161, 1090, 757, 716  $\text{cm}^{-1}$ ; HRMS  $m/z$  (ESI) calcd for  $\text{C}_{14}\text{H}_{16}\text{ONa}$  ( $\text{M} + \text{Na}$ ) $^+$ : 223.10934, found 223.10912.

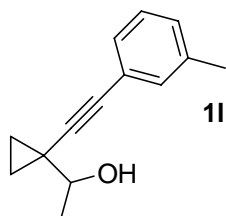

12)

**1-(1-(*m*-Tolylethynyl)cyclopropyl) ethanol (12):** liquid;  $^1\text{H}$  NMR ( $\text{CDCl}_3$ , 300 MHz):  $\delta$  = 7.27-7.04 (m, 4 H), 3.25-3.11 (m, 1 H), 2.31 (s, 3 H), 1.79 (d,  $J$  = 4.2 Hz, 1 H), 1.42 (d,  $J$  = 6.3 Hz, 3 H), 1.12-0.97 (m, 2 H), 0.96-0.83 (m, 1 H), 0.80-0.71 (m, 1 H);  $^{13}\text{C}$  NMR ( $\text{CDCl}_3$ , 75.4 MHz):  $\delta$  = 137.8, 132.3, 128.7, 128.6, 128.0, 123.2, 90.6, 79.4, 73.2, 21.1, 19.9, 14.2, 13.2 ppm; MS (70 eV):  $m/z$  (%): 200.1 (45), [ $\text{M}^+$ ], 141.1 (100). IR (neat):  $\nu$  = 3396, 2974, 2926, 2221, 2008, 1720, 1602, 1485, 1449, 1375, 1106, 784, 692  $\text{cm}^{-1}$ ; HRMS  $m/z$  (ESI) calcd for  $\text{C}_{14}\text{H}_{16}\text{ONa}$  ( $\text{M} + \text{Na}$ ) $^+$ : 223.10934, found 223.10933.

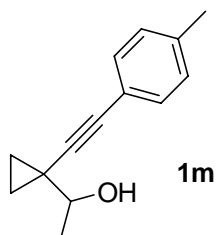

13)

**1-(1-(*p*-Tolylethynyl)cyclopropyl) ethanol (1m):** liquid;  $^1\text{H}$  NMR ( $\text{CDCl}_3$ , 300 MHz):  $\delta$  = 7.29 (d,  $J$  = 7.8 Hz, 2 H), 7.07 (d,  $J$  = 7.8 Hz, 2 H), 3.18 (q,  $J$  = 6.3 Hz, 1 H), 2.32 (s, 3 H), 1.93 (brs, 1 H), 1.41 (d,  $J$  = 6.3 Hz, 3 H), 1.09-0.95 (m, 2 H), 0.94-0.85 (m, 1 H), 0.79-0.70 (m, 1 H);  $^{13}\text{C}$  NMR ( $\text{CDCl}_3$ , 75.4 MHz):  $\delta$  = 137.7, 131.6, 128.9, 120.3, 90.0, 79.4, 73.3, 21.4, 21.1, 19.9, 14.3, 13.2 ppm; MS (70 eV):  $m/z$  (%): 200.2 (5) [ $\text{M}^+$ ], 141.1 (100). IR (neat):  $\nu$  = 3386, 2972, 2925, 2870, 2221, 1904, 1510, 1450, 1375, 1023, 955, 925, 880, 817, 524  $\text{cm}^{-1}$ ; HRMS  $m/z$  (ESI) calcd for  $\text{C}_{14}\text{H}_{16}\text{ONa}$  ( $\text{M} + \text{Na}$ ) $^+$ : 223.10934, found 223.10905.

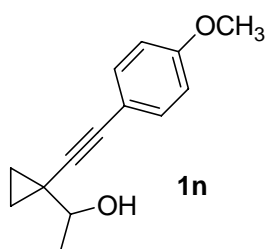

14)

**1-(1-(4-Methoxyphenyl)ethynyl)cyclopropyl ethanol (1n)**: liquid;  $^1\text{H}$  NMR ( $\text{CDCl}_3$ , 300 MHz):  $\delta$  = 7.34 (d,  $J$  = 8.8 Hz, 2 H), 6.81 (d,  $J$  = 8.8 Hz, 2 H), 3.80 (s, 3 H), 3.18 (q,  $J$  = 6.3 Hz, 1 H), 1.84 (brs, 1 H), 1.41 (d,  $J$  = 6.3 Hz, 3 H), 1.05-0.95 (m, 2 H), 0.93-0.84 (m, 1 H), 0.80-0.70 (m, 1 H);  $^{13}\text{C}$  NMR ( $\text{CDCl}_3$ , 75.4 MHz):  $\delta$  = 159.2, 133.1, 115.6, 113.8, 89.2, 79.1, 73.3, 55.2, 21.1, 18.9, 14.3, 13.1 ppm; MS (70 eV):  $m/z$  (%): 216.0 (43) [ $\text{M}^+$ ], 43.1 (100); IR (neat):  $\nu$  = 3407, 2971, 2932, 2838, 2221, 2006, 1719, 1606, 1510 1287, 1247, 1173, 1032, 925, 833, 749  $\text{cm}^{-1}$ ; HRMS  $m/z$  (ESI) calcd for  $\text{C}_{14}\text{H}_{17}\text{O}_2$  ( $\text{M} + \text{H}$ ) $^+$ : 217.12231, found 217.12219.

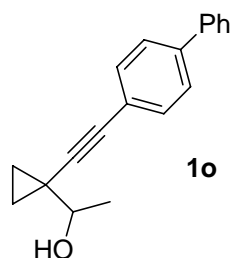

15)

**1-(1-(4-Phenyl-phenyl-ethynyl)cyclopropyl ethanol (1o)**: solid, mp 52~54 °C,  $^1\text{H}$  NMR ( $\text{CDCl}_3$ , 300 MHz):  $\delta$  = 7.63-7.27 (m, 9 H), 3.28-3.15 (m, 1 H), 1.81 (d,  $J$  = 6.0 Hz, 1 H), 1.44 (d,  $J$  = 6.0 Hz, 3 H), 1.15-0.98 (m, 2 H), 0.97-0.94 (m, 1 H), 0.83-0.72 (m, 1 H);  $^{13}\text{C}$  NMR ( $\text{CDCl}_3$ , 75.4 MHz):  $\delta$  = 140.40, 140.35, 132.1, 128.8, 127.5, 126.9, 126.8, 122.4, 91.7, 79.2, 73.2, 21.2, 20.0, 14.3, 13.3 ppm; MS (70 eV):  $m/z$  (%): 262.1 (100) [ $\text{M}^+$ ]; IR (neat):  $\nu$  = 3351, 2969, 2926, 2881, 2218, 1487, 1447, 1103, 1088, 924, 841, 762, 721, 692  $\text{cm}^{-1}$ ; HRMS  $m/z$  (ESI) calcd for  $\text{C}_{19}\text{H}_{18}\text{ONa}$  ( $\text{M} + \text{Na}$ ) $^+$ : 285.12499, found 285.12458.

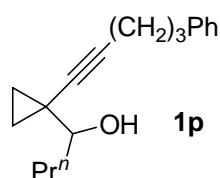

16)

**1-(1-(5'-Phenylpent-1-ynyl)cyclopropyl butanol<sup>2</sup> (1p)**: liquid;  $^1\text{H}$  NMR ( $\text{CDCl}_3$ , 300 MHz):  $\delta$  = 7.34-7.25 (m, 2 H), 7.23-7.14 (m, 3 H), 2.80 (t,  $J$  = 6.3 Hz, 1 H), 2.70 (t,  $J$  = 7.5 Hz, 2 H), 2.17 (t,  $J$  = 6.9 Hz, 2 H), 1.89-1.60 (m, 5 H), 1.58-1.30 (m, 2 H), 0.99-0.80 (m, 5 H), 0.78-0.70 (m, 1 H), 0.69-0.60 (m, 1 H);  $^{13}\text{C}$  NMR ( $\text{CDCl}_3$ , 75.4 MHz):  $\delta$  = 141.7, 128.4, 128.3, 125.8, 81.6, 78.7, 77.2, 37.9, 34.8, 30.6, 19.1, 18.6, 18.2, 14.1, 13.5, 13.2 ppm; MS (70 eV):  $m/z$  (%): 256.3 (4) [ $\text{M}^+$ ], 60.1 (100) ; IR (neat):  $\nu$  = 3462, 3024, 2974, 2932, 2866, 2237, 1738, 1686, 1453, 1376, 1243, 1111, 964, 748, 701  $\text{cm}^{-1}$ ; HRMS  $m/z$  (ESI) calcd for  $\text{C}_{18}\text{H}_{24}\text{ONa}$  ( $\text{M} + \text{Na}$ ) $^+$ : 279.17194, found 279.1721.

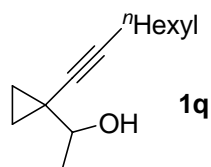

17)

**1-(1-(Oct-1-ynyl)cyclopropyl) ethanol<sup>2</sup> (1q)**: liquid; <sup>1</sup>H NMR (CDCl<sub>3</sub>, 300 MHz): δ = 3.15-2.96 (m, 1 H), 2.16 (t, *J* = 6.9 Hz, 2 H), 1.47 (q, *J* = 6.9 Hz, 2 H), 1.42-1.20 (m, 10 H), 1.01-0.81 (m, 5 H), 0.80-0.70 (m, 1 H), 0.66-0.54 (m, 1 H); <sup>13</sup>C NMR (CDCl<sub>3</sub>, 75.4 MHz): δ = 80.7, 79.7, 73.4, 31.3, 29.0, 28.5, 22.5, 21.0, 19.4, 18.8, 14.0, 13.9, 12.6 ppm; MS (70 eV): *m/z* (%): 194.3 (1) [M<sup>+</sup>], 115.1 (100); IR (neat): ν = 3376, 2959, 2928, 2859, 2237, 2019, 1723, 1459, 1374, 1096, 1052 cm<sup>-1</sup>; HRMS *m/z* (ESI) calcd for C<sub>13</sub>H<sub>23</sub>O (M + H)<sup>+</sup>: 195.17434, found 195.17418.

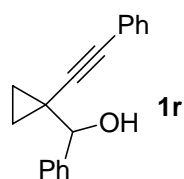

18)

**1-Phenyl-(1-(phenylethynyl)cyclopropyl) methanol (1r)**: liquid; <sup>1</sup>H NMR (CDCl<sub>3</sub>, 300 MHz): δ = 7.52 (d, *J* = 6.9 Hz, 2 H), 7.50-7.02 (m, 8 H), 4.32 (s, 1 H), 2.33 (brs, 1 H), 1.20-0.95 (m, 4 H); <sup>13</sup>C NMR (CDCl<sub>3</sub>, 75.4 MHz): δ = 141.6, 131.6, 128.1, 127.9, 127.7, 126.7, 123.4, 91.4, 79.6, 78.2, 19.9, 14.5, 13.2 ppm; MS (70 eV): *m/z* (%): 248.2 (8) [M<sup>+</sup>], 91.1 (100); IR (neat): ν = 3451, 3026, 2958, 2926, 2861, 2237, 1693, 1493, 1450, 1360, 1134, 747, 697 cm<sup>-1</sup>; HRMS *m/z* (ESI) calcd for C<sub>18</sub>H<sub>16</sub>O (M + H)<sup>+</sup>: 271.10934, found 271.1091.

#### General producer for 2-Methyl-1-(phenylethynyl) cyclobutanol (2a):

1-(1-(Phenylethynyl)cyclopropyl) ethanol (**1a**) (0.2 mmol, 37.2 mg) was added to the a mixture of FeCl<sub>2</sub> (0.02 mmol, 2.5 mg, 10 mol%) and 2 mL acetone/nitromethane = 1/1. The mixture was stirred at RT for 48 h. The resulting mixture was concentrated and purified by flash chromatography on silica gel (eluent: petroleum ether/ether = 5:1) to afford 25 mg (78 %, based on the conversion, *trans/cis* = 9:1) of **2a**; liquid; and 4.3 mg (12%) of **1a** was recovered.

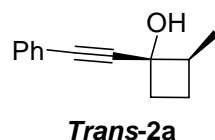

19)

**Trans-2-methyl-1-(phenylethynyl) cyclobutanol (trans-2a)**: liquid; <sup>1</sup>H NMR (CDCl<sub>3</sub>, 300 MHz): δ = 7.50-7.38 (m, 2 H), 7.36-7.26 (m, 3 H), 2.58-2.38 (m, 2 H), 2.28 (brs, 1 H), 2.16 (q, *J* = 9.6 Hz, 1 H), 1.99-1.85 (m, 1 H), 1.44-1.24 (m, 1 H), 1.19 (d, *J* = 6.6 Hz, 3 H); <sup>13</sup>C NMR (CDCl<sub>3</sub>, 75.4 MHz): δ =

131.7, 128.2, 122.7, 89.8, 86.3, 72.6, 44.0, 36.0, 20.6, 16.1 (one carbon missing as a result of overlap) ppm; MS (70 eV): m/z (%):186.3 (5) [M<sup>+</sup>], 144.2 (100); IR (neat):  $\nu = 3396, 2958, 2867, 2224, 1630, 1598, 1090, 756, 691 \text{ cm}^{-1}$ ; HRMS m/z (ESI) calcd for C<sub>13</sub>H<sub>15</sub>O (M + H)<sup>+</sup>: 187.11174, found 187.11143.

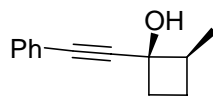

**Cis-2a**

20)

**Cis-2-methyl-1-(phenylethynyl) cyclobutanol (cis-2a):** liquid; <sup>1</sup>H NMR (CDCl<sub>3</sub>, 300 MHz):  $\delta = 7.52\text{-}7.40$  (m, 2 H), 7.36-7.26 (m, 3 H), 2.82-2.68 (1, 2 H), 2.54-2.40 (m, 1 H), 2.34-2.19 (m, 1 H), 2.16-1.91 (m, 1 H), 1.70-1.51 (m, 1 H), 1.14 (d,  $J = 7.2 \text{ Hz}$ , 3 H); <sup>13</sup>C NMR (CDCl<sub>3</sub>, 75.4 MHz):  $\delta = 131.6, 128.2, 122.8, 92.8, 83.4, 69.4, 42.3, 35.3, 22.7, 13.9$  (one carbon missing as a result of overlap) ppm; MS (70 eV): m/z (%):186.3 (2) [M<sup>+</sup>], 144.1 (100); IR (neat):  $\nu = 3335, 2958, 2923, 2866, 2222, 1601, 1485, 1451, 1090, 756, 691 \text{ cm}^{-1}$ .

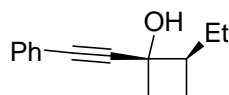

**Trans-2b**

21)

**Trans-1-(phenylethynyl) -2-ethyl cyclobutanol (trans-2b):** The reaction of **1b** (40 mg, 0.2 mmol), FeCl<sub>2</sub> (0.02 mmol, 2.5 mg, 10 mol%) and 2 mL acetone/nitromethane = 1/1 afforded 24 mg (88 %, based on the conversion, *trans/cis* = 6:1) of **2b**, and 12.8 mg (32 %) of **1b** was recovered. **Trans-2b:** liquid; <sup>1</sup>H NMR (CDCl<sub>3</sub>, 300 MHz):  $\delta = 7.49\text{-}7.40$  (m, 2 H), 7.38-7.24 (m, 3 H), 2.69 (brs, 1 H), 2.44-2.22 (m, 2 H), 2.18-1.97 (m, 1 H), 1.96-1.84 (m, 1 H), 1.80-1.63 (m, 1 H), 1.62-1.44 (m, 1 H), 1.42-1.26 (m, 1 H), 0.94 (t,  $J = 7.5 \text{ Hz}$ , 3 H); <sup>13</sup>C NMR (CDCl<sub>3</sub>, 75.4 MHz):  $\delta = 131.7, 128.3, 122.8, 89.9, 86.0, 72.1, 51.0, 35.8, 25.0, 19.0, 11.4$  (one carbon missing as a result of overlap) ppm; MS (70 eV): m/z (%): 200.0 (10) [M<sup>+</sup>], 127.7 (100); IR (neat):  $\nu = 3410, 2965, 2931, 2876, 2224, 1491 \text{ cm}^{-1}$ ; HRMS m/z (ESI) calcd for C<sub>14</sub>H<sub>16</sub>ONa (M + Na)<sup>+</sup>: 223.10934, found 223.10874.

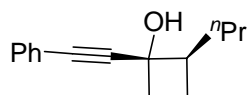

**Trans-2c**

22)

**Trans-1-(phenylethynyl)-2-propyl cyclobutanol (trans-2c):** The reaction of **1c** (42.8 mg, 0.2 mmol), FeCl<sub>2</sub> (0.02 mmol, 2.5 mg, 10 mol%) and 2 mL acetone/nitromethane = 1/1 afforded 24.5 mg (57 %, *trans/cis* = 4:1) of **2c**. **Trans-2c** liquid; <sup>1</sup>H NMR (CDCl<sub>3</sub>, 300 MHz):  $\delta = 7.50\text{-}7.39$  (m, 2 H), 7.33-7.31 (m, 3 H), 2.50-2.30 (m, 3 H), 2.12 (q,  $J = 10.2 \text{ Hz}$ , 1 H), 1.90-1.80 (m, 1 H), 1.76-1.64, (m, 1 H), 1.55-1.26



(m, 4 H), 0.93 (t,  $J = 7.2$  Hz, 3 H);  $^{13}\text{C}$  NMR ( $\text{CDCl}_3$ , 75.4 MHz):  $\delta = 131.7, 128.3, 122.8, 90.0, 86.0, 72.2, 49.1, 35.9, 34.1, 20.2, 19.2, 14.3$  (one carbon missing as a result of overlap) ppm; MS (70 eV):  $m/z$  (%): 213.9 (4) [ $\text{M}^+$ ], 127.9 (100); IR (neat):  $\nu = 3339, 2956, 2927, 2868, 2228, 1714, 1598, 1491, 1460, 1107, 975, 756, 692$   $\text{cm}^{-1}$ ; HRMS  $m/z$  (ESI) calcd for  $\text{C}_{15}\text{H}_{18}\text{ONa}$  ( $\text{M} + \text{Na}$ ) $^+$ : 237.12499, found 237.12461. **Cis-2c** liquid;  $^1\text{H}$  NMR ( $\text{CDCl}_3$ , 400 MHz):  $\delta = 7.50\text{-}7.39$  (m, 2 H), 7.35-7.27 (m, 3 H), 2.72-2.60 (m, 1 H), 2.50-2.39 (m, 1 H), 2.25-2.15 (m, 1 H), 2.06-1.91 (m, 1 H), 1.78-1.64 (m, 2 H), 1.50-1.30 (m, 3 H), 1.00-0.90 (m, 4 H);  $^{13}\text{C}$  NMR ( $\text{CDCl}_3$ , 75.4 MHz):  $\delta = 131.7, 131.6, 128.2, 122.8, 92.8, 83.6, 69.6, 47.3, 35.3, 31.1, 21.9, 20.1, 14.2$  ppm;

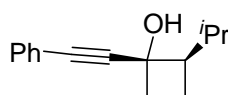

**Trans-2d**

23)

**Trans-1-(phenylethynyl)-2-isopropyl cyclobutanol (trans-2d)**: The reaction of **1d** (85.6 mg, 0.4 mmol),  $\text{FeCl}_2$  (0.04 mmol, 5.1 mg, 10 mol%) and 4 mL acetone/nitromethane = 1/1 afforded 42.0 mg (49 %, *trans/cis* = 2:1) of **2d**. **Trans-2d**: solid, mp 56~58 °C (*n*-hexane/ethyl acetate);  $^1\text{H}$  NMR ( $\text{CDCl}_3$ , 300 MHz):  $\delta = 7.50\text{-}7.40$  (m, 2 H), 7.39-7.26 (m, 3 H), 2.40-2.20 (m, 2 H), 2.19-1.80 (m, 4 H), 1.47-1.25 (m, 1 H), 1.03 (d,  $J = 6.3$  Hz, 3 H), 0.84 (d,  $J = 6.3$  Hz, 3 H);  $^{13}\text{C}$  NMR ( $\text{CDCl}_3$ , 75.4 MHz):  $\delta = 131.7, 128.2, 122.8, 90.1, 85.5, 71.7, 56.9, 35.4, 31.3, 20.3, 19.5, 18.2$  (one carbon missing as a result of overlap) ppm; MS (70 eV):  $m/z$  (%): 213.9 (2) [ $\text{M}^+$ ], 144.1 (100); IR (neat):  $\nu = 3333, 2958, 2866, 2224, 1491, 1090, 756, 691$   $\text{cm}^{-1}$ ; HRMS  $m/z$  (ESI) calcd for  $\text{C}_{15}\text{H}_{18}\text{O}_3\text{Na}$  ( $3\text{M} + \text{Na}$ ) $^+$ : 362.24081, found 362.24226. **Cis-2d**:  $^1\text{H}$  NMR ( $\text{CDCl}_3$ , 300 MHz):  $\delta = 7.39$  (d,  $J = 2.7$  Hz, 2 H), 7.36-7.26 (m, 3 H), 2.45-2.30 (m, 1 H), 2.30-2.20 (m, 1 H), 2.18-1.98 (m, 1 H), 1.95-1.75 (m, 4 H), 1.02 (d,  $J = 6.3$  Hz, 3 H), 0.83 (d,  $J = 6.3$  Hz, 3 H);  $^{13}\text{C}$  NMR ( $\text{CDCl}_3$ , 75.4 MHz):  $\delta = 131.5, 128.22, 128.16, 122.9, 92.8, 83.9, 69.7, 54.4, 34.4, 28.1, 21.9, 20.6, 19.1$  ppm.

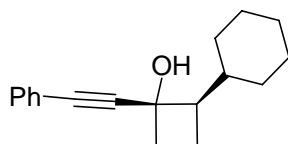

**Trans-2e**

24)

**Trans-1-(phenylethynyl)-2-cyclohexyl cyclobutanol (trans-2e)**: The reaction of **1e** (102 mg, 0.4 mmol),  $\text{FeCl}_2$  (0.04 mmol, 5.1 mg, 10 mol%) and 4 mL acetone/nitromethane = 1/1 afforded 38 mg (38 %, *trans/cis* = 4:1) of **2e**. **Trans-2e**: solid, mp 96~98 °C (*n*-hexane/ethyl acetate);  $^1\text{H}$  NMR ( $\text{CDCl}_3$ , 300 MHz):  $\delta = 7.52\text{-}7.40$  (m, 2 H), 7.38-7.25 (m, 3 H), 2.33 (q,  $J = 9.3$  Hz, 2 H), 2.20-1.98 (m, 3 H), 1.85-1.50 (m, 6 H), 1.48-1.10 (m, 3 H), 1.05-0.75 (m, 3 H);  $^{13}\text{C}$  NMR ( $\text{CDCl}_3$ , 75.4 MHz):  $\delta = 131.8, 128.3,$

122.9, 90.2, 85.6, 71.8, 55.2, 40.9, 35.5, 31.1, 29.7, 26.6, 26.0, 25.9, 17.7 (one carbon missing as a result of overlap) ppm; MS (70 eV): m/z (%): 254.3 (5) [ $M^+$ ], 184.1 (100); IR (neat):  $\nu = 3417, 2968, 2926, 2855, 2219, 2156, 1715, 1451, 1375, 1089, 1028, 928, 808 \text{ cm}^{-1}$ ; HRMS m/z (ESI) calcd for  $C_{18}H_{22}ONa$  ( $M + Na$ ) $^+$ : 277.15629, found 277.15683. **Cis-2e**:  $^1H$  NMR ( $CDCl_3$ , 300 MHz):  $\delta = 7.50-7.36$  (m, 2 H), 7.34-7.24 (m, 3 H), 2.50-2.20 (m, 2 H), 2.15-1.98 (m, 1 H), 1.96-1.80 (m, 4 H), 1.73-1.50 (m, 6 H), 1.10-0.77 (m, 4 H);  $^{13}C$  NMR ( $CDCl_3$ , 75.4 MHz):  $\delta = 131.5, 128.2, 128.1, 122.9, 92.8, 83.9, 69.8, 52.6, 37.5, 34.7, 31.3, 29.2, 26.6, 26.0, 25.6, 21.5$  ppm.

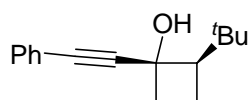

**Trans-2f**

25)

**Trans-1-(phenylethynyl)-2-tert-butyl cyclobutanol (trans-2f)**: The reaction of **1f** (45.6 mg, 0.2 mmol),  $FeCl_2$  (0.02 mmol, 2.5 mg, 10 mol%) and 2 mL acetone/nitromethane = 1/1 afforded 6.5 mg (14 %, *trans/cis* >99:1) of **2f**, **Trans-2f**: liquid;  $^1H$  NMR ( $CDCl_3$ , 300 MHz):  $\delta = 7.50-7.38$  (m, 2 H), 7.35-7.26 (m, 3 H), 2.80-2.67 (m, 1 H), 2.54-2.38 (m, 1 H), 2.30-2.13 (m, 1 H), 2.10-1.94 (m, 1 H), 1.87-1.26 (m, 2 H), 1.10-0.80 (m, 9 H);  $^{13}C$  NMR ( $CDCl_3$ , 75.4 MHz):  $\delta = 131.6, 128.2, 122.8, 92.7, 83.7, 69.9, 45.6, 38.0, 35.2, 26.0, 23.0, 22.9, 22.5$  (one carbon missing as a result of overlap) ppm; MS (70 eV): m/z (%): 228.1 (1) [ $M^+$ ], 142.1 (100); IR (neat):  $\nu = 3418, 3027, 2940, 2222, 1718, 1452, 1079, 756, 697 \text{ cm}^{-1}$ ; HRMS m/z (ESI) calcd for  $C_{16}H_{20}ONa$  ( $M + Na$ ) $^+$ : 277.15629, found 277.15509.

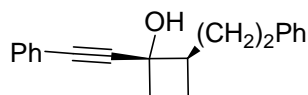

**Trans-2g**

26)

**Trans-1-(phenylethynyl)-2-phenethyl cyclobutanol (trans-2g)**: The reaction of **1g** (55.2 mg, 0.2 mmol),  $FeCl_2$  (0.02 mmol, 2.5 mg, 10 mol%) and 2 mL acetone/nitromethane = 1/1 afforded 30.0 mg (54 %, *trans/cis* = 2:1) of **2g**, **Trans-2g** liquid;  $^1H$  NMR ( $CDCl_3$ , 300 MHz):  $\delta = 7.52-7.40$  (m, 2 H), 7.39-7.10 (m, 8 H), 2.80-2.55 (m, 2 H), 2.52-2.34 (m, 2 H), 2.27 (brs, 1 H), 2.21-1.96 (m, 2 H), 1.95-1.73 (m, 2 H), 1.47-1.30 (m, 1 H);  $^{13}C$  NMR ( $CDCl_3$ , 75.4 MHz):  $\delta = 142.4, 131.7, 128.5, 128.4, 128.3, 125.7, 122.7, 89.8, 86.2, 72.1, 48.7, 35.9, 33.8, 33.4, 19.1$  ppm (one carbon missing as a result of overlap); MS (70 eV): m/z (%): [ $M^+$ ], 276.0 (1), 43.2 (100); IR (neat):  $\nu = 3416, 3082, 3060, 3027, 2923, 2220, 1720, 1599, 1493, 1071, 1033, 755, 697 \text{ cm}^{-1}$ ; HRMS m/z (ESI) calcd for  $C_{20}H_{20}ONa$  ( $M + Na$ ) $^+$ : 299.14064, found 299.14151. **Cis-2g** liquid;  $^1H$  NMR ( $CDCl_3$ , 300 MHz):  $\delta = 7.56-7.37$  (m, 2 H), 7.35-7.10 (m, 8 H), 2.72-2.53 (m, 3 H), 2.52-2.40 (m, 1 H), 2.28-2.16 (m, 1 H), 2.12-1.90 (m, 3 H), 1.85-1.65 (m, 2 H);  $^{13}C$  NMR

(CDCl<sub>3</sub>, 75.4 MHz):  $\delta$  = 142.3, 131.6, 128.5, 128.3, 125.7, 122.7, 92.7, 83.8, 69.4, 46.7, 35.3, 33.1, 30.9, 21.7 (two carbons missing as a result of overlap) ppm;

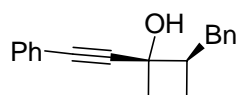

**Trans-2h**

27)

**Trans-1-(phenylethynyl)-2-benzyl cyclobutanol (*trans*-2h):** The reaction of **1h** (52.4 mg, 0.2 mmol), FeCl<sub>2</sub> (0.02 mmol, 2.5 mg, 10 mol%) and 2 mL acetone/nitromethane = 1/1 afforded 26 mg (50 %, *trans/cis* = 4:1) of **2h**, **Trans-2h**: liquid. <sup>1</sup>H NMR (CDCl<sub>3</sub>, 300 MHz):  $\delta$  = 7.51-7.10 (m, 10 H), 3.09-2.95 (m, 2 H), 2.89-2.70 (m, 1 H), 2.60-2.45 (m, 1 H), 2.33-2.25 (m, 1 H), 2.17 (s, 1 H), 2.03-1.80 (m, 2 H); <sup>13</sup>C NMR (CDCl<sub>3</sub>, 75.4 MHz):  $\delta$  = 140.0, 131.7, 128.4, 128.1, 128.0, 127.7, 126.7, 122.4, 89.6, 77.2, 74.0, 54.6, 35.5, 29.7, 17.1 ppm; MS (70 eV): *m/z* (%): 262.2 (28), [M<sup>+</sup>], 142.2 (100); IR (neat):  $\nu$  = 3363, 3092, 3010, 2975, 2219, 1715, 1449, 1370, 1070, 1029, 929, 807, cm<sup>-1</sup>; HRMS *m/z* (ESI) calcd for C<sub>19</sub>H<sub>18</sub>ONa (M + Na)<sup>+</sup>: 285.12499, found 285.12459.

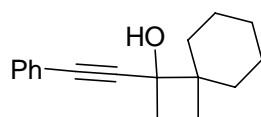

**2i**

28)

**1-(Phenylethynyl)- spiro[3.5]nonan-1-ol (2i):** The reaction of **1i** (48 mg, 0.2 mmol), FeCl<sub>2</sub> (0.02 mmol, 2.5 mg, 10 mol%) and 2 mL acetone/nitromethane = 1/1 afforded 9.6 mg (20 %) of **2i** and 14 mg (31%) of **3i**. **2i**: liquid; <sup>1</sup>H NMR (CDCl<sub>3</sub>, 300 MHz):  $\delta$  = 7.50-7.40 (m, 2 H), 7.35-7.26 (m, 3 H), 2.49-2.30 (m, 1 H), 2.28-2.13 (m, 1 H), 2.07 (brs, 1 H), 1.85-1.10 (m, 12H); <sup>13</sup>C NMR (CDCl<sub>3</sub>, 75.4 MHz):  $\delta$  = 131.6, 128.2, 122.9, 90.8, 85.9, 73.2, 48.2, 35.4, 33.6, 30.9, 26.0, 25.7, 22.9, 22.5 (one carbon missing as a result of overlap) ppm; MS (70 eV): *m/z* (%): 241.2 (4) [M<sup>+</sup> + 1], 158.1 (100); IR (neat):  $\nu$  = 3448, 3060, 3028, 2931, 2858, 2223, 1720, 1493, 756, 698 cm<sup>-1</sup>; HRMS *m/z* (ESI) calcd for C<sub>17</sub>H<sub>20</sub>ONa (M + Na)<sup>+</sup>: 263.14064, found 263.14016.

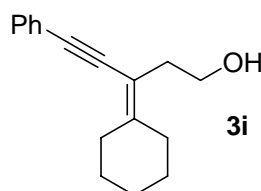

**3i**

29)

**3-Cyclohexylidene-5-phenylpent-4-yn-1-ol (3i):** liquid; <sup>1</sup>H NMR (CDCl<sub>3</sub>, 300 MHz):  $\delta$  = 7.50-7.38 (m, 2 H), 7.35-7.26 (m, 3 H), 3.84 (t, *J* = 6.3 Hz, 2 H), 2.55 (t, *J* = 6.6 Hz, 4 H), 2.32 (t, *J* = 6.0 Hz, 2 H), 1.80-1.50 (m, 7 H); <sup>13</sup>C NMR (CDCl<sub>3</sub>, 75.4 MHz):  $\delta$  = 151.0, 131.2, 128.2, 127.7, 123.8, 110.0, 92.0,

89.6, 61.7, 34.7, 34.2 30.4, 28.1, 28.0, 26.5 ppm; MS (70 eV): m/z (%): 241.3 (3) [ $M^+ + 2$ ], 144.1 (100); IR (neat):  $\nu = 3426, 3064, 2973, 2928, 2219, 1734, 1376, 1108, 1024, 757 \text{ cm}^{-1}$ ; HRMS m/z (ESI) calcd for  $C_{17}H_{21}O (M + H)^+$ : 241.15869, found 241.15897.

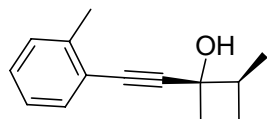

**Trans-2k**

30)

**Trans-1-(o-tolyethynyl)-2-methyl cyclobutanol (trans-2k):** The reaction of **1k** (80 mg, 0.4 mmol),  $FeCl_2$  (0.04 mmol, 5.0 mg, 10 mol%) and 4 mL acetone/nitromethane = 1/1 afforded 49.4 mg (62 %, *trans/cis* = 3:1) of **2k**. **Trans-2k**: liquid;  $^1H$  NMR ( $CDCl_3$ , 300 MHz):  $\delta = 7.43$  (d,  $J = 7.5$  Hz, 1 H), 7.25-7.05 (m, 3 H), 2.57-2.34 (m, 2 H), 2.45 (s, 3 H), 2.18 (q,  $J = 10.2$  Hz, 1 H), 1.98-1.85 (m, 1 H), 1.45-1.26 (m, 2 H), 1.20 (d,  $J = 6.9$  Hz, 3 H);  $^{13}C$  NMR ( $CDCl_3$ , 75.4 MHz):  $\delta = 140.1, 132.1, 129.4, 128.3, 125.5, 122.5, 93.8, 85.1, 72.8, 44.0, 36.3, 20.8, 20.7, 16.3$  ppm; MS (70 eV): m/z (%): 199.2 (2) [ $M^+ - 1$ ], 115.1 (100); IR (neat):  $\nu = 3357, 2959, 2866, 2221, 1740, 1720, 1486, 1454, 1377, 1090, 757, 716 \text{ cm}^{-1}$ ; HRMS m/z (ESI) calcd for  $C_{14}H_{16}ONa (M + Na)^+$ : 223.10934, found 223.10914. **Cis-2k**: liquid;  $^1H$  NMR ( $CDCl_3$ , 300 MHz):  $\delta = 7.39$  (d,  $J = 7.8$  Hz, 1 H), 7.26-7.10 (m, 3 H), 2.76 (q,  $J = 6.9$  Hz, 1 H), 2.60-2.40 (m, 1 H), 2.43 (s, 3 H), 2.38-2.20 (m, 1 H), 2.14-1.90 (m, 2 H), 1.72-1.51 (m, 1 H), 1.16 (d,  $J = 6.9$  Hz, 3 H);  $^{13}C$  NMR ( $CDCl_3$ , 75.4 MHz):  $\delta = 140.1, 131.8, 129.4, 128.2, 125.5, 122.5, 96.9, 82.3, 69.4, 42.6, 35.6, 22.7, 20.6, 13.9$  ppm;

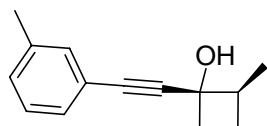

**Trans-2l**

31)

**Trans-1-(m-tolyethynyl)-2-methyl cyclobutanol (trans-2l):** The reaction of **1l** (40 mg, 0.2 mmol),  $FeCl_2$  (0.02 mmol, 2.5 mg, 10 mol%) and 2 mL acetone/nitromethane = 1/1 afforded 21.2 mg (53 %, *trans/cis* = 3:1) of **2l**. **Trans-2l**: liquid.  $^1H$  NMR ( $CDCl_3$ , 300 MHz):  $\delta = 7.35$ -7.10 (m, 4 H), 2.56-2.25 (m, 3 H), 2.33 (s, 3 H), 2.16 (q,  $J = 9.9$  Hz, 1 H), 1.98-1.83 (m, 1 H), 1.45-1.26 (m, 1 H), 1.19 (d,  $J = 6.61$  Hz, 3 H);  $^{13}C$  NMR ( $CDCl_3$ , 75.4 MHz):  $\delta = 138.0, 132.300, 129.2, 128.8, 128.2, 122.5, 89.4, 86.5, 72.6, 44.0, 36.0, 21.2, 20.6, 16.2$  ppm; MS (70 eV): m/z (%): 199.9 (18) [ $M^+$ ], 127.9 (100); IR (neat):  $\nu = 3412, 2961, 2928, 2866, 2220, 1687, 1601, 1485, 1453, 1376, 1094, 785, 691 \text{ cm}^{-1}$ ; HRMS m/z (ESI) calcd for  $C_{14}H_{17}O (M + H)^+$ : 201.12739, found 201.12669. **Cis-2l**: liquid.  $^1H$  NMR ( $CDCl_3$ , 300 MHz):  $\delta = 7.50$ -7.00 (m, 4 H), 2.74 (q,  $J = 7.2$  Hz, 1 H), 2.54-2.35 (m, 1 H), 2.34-2.19 (m, 1 H), 2.32 (s, 3 H), 2.16-1.90

(m, 1 H), 1.70-1.51 (m, 1 H), 1.14 (d,  $J = 6.9$  Hz, 3 H);  $^{13}\text{C}$  NMR ( $\text{CDCl}_3$ , 75.4 MHz):  $\delta = 137.9, 132.2, 129.1, 128.7, 128.1, 122.6, 92.4, 83.6, 69.4, 42.4, 35.4, 22.7, 21.2, 13.9$  ppm;

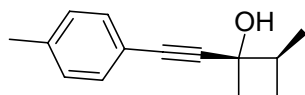

**Trans-2m**

32)

**Trans-1-(p-tolylethynyl)-2-methyl cyclobutanol (trans-2m):** The reaction of **1m** (40 mg, 0.2 mmol),  $\text{FeCl}_2$  (0.02 mmol, 2.5 mg, 10 mol%) and 2 mL acetone/nitromethane = 1/1 afforded 24.1 mg (60 %, *trans/cis* = 3:1) of **2m**. **Trans-2m**: liquid;  $^1\text{H}$  NMR ( $\text{CDCl}_3$ , 300 MHz):  $\delta = 7.35$  (d,  $J = 7.8$  Hz, 2 H), 7.12 (d,  $J = 7.8$  Hz, 2 H), 2.55-2.25 (m, 3 H), 2.35 (s, 3 H), 2.15 (q,  $J = 9.9$  Hz, 1 H), 1.97-1.82 (m, 1 H), 1.45-1.26 (m, 1 H), 1.18 (d,  $J = 6.9$  Hz, 3 H);  $^{13}\text{C}$  NMR ( $\text{CDCl}_3$ , 75.4 MHz):  $\delta = 138.4, 131.6, 129.0, 119.7, 89.0, 86.4, 72.6, 44.0, 36.1, 21.4, 20.6, 16.2$  ppm; MS (70 eV):  $m/z$  (%): 200.0 (5) [ $\text{M}^+$ ], 141.1 (100); IR (neat):  $\nu = 3436, 2956, 2926, 2870, 2202, 1763, 1717, 1492, 1449, 1103, 756, 696$   $\text{cm}^{-1}$ ; HRMS  $m/z$  (ESI) calcd for  $\text{C}_{14}\text{H}_{17}\text{OH}$  ( $\text{M} + \text{H}$ ) $^+$ : 201.12739, found 201.12741. **Cis-2m**: liquid;  $^1\text{H}$  NMR ( $\text{CDCl}_3$ , 300 MHz):  $\delta = 7.32$  (d,  $J = 7.8$  Hz, 2 H), 7.16 (d,  $J = 7.8$  Hz, 2 H), 2.74 (q,  $J = 7.2$  Hz, 1 H), 2.50-2.37 (m, 1 H), 2.40 (s, 3 H), 2.34-2.18 (m, 1 H), 2.15-1.91 (m, 2 H), 1.70-1.51 (m, 1 H), 1.14 (d,  $J = 7.2$  Hz, 3 H);  $^{13}\text{C}$  NMR ( $\text{CDCl}_3$ , 75.4 MHz):  $\delta = 138.3, 131.5, 129.0, 119.7, 92.0, 83.5, 69.4, 42.3, 35.4, 22.7, 21.4, 13.9$  ppm;

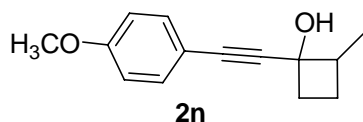

**2n**

33)

**1-((4-Methoxyphenyl)ethynyl)-2-methyl cyclobutanol (2n):** liquid; The reaction of **1n** (40 mg, 0.2 mmol),  $\text{FeCl}_2$  (0.02 mmol, 2.5 mg, 10 mol%) and 2 mL acetone/nitromethane = 1/1 afforded 27 mg (63 %, *trans/cis* = 5:1) of **2n**. **Trans-2n**:  $^1\text{H}$  NMR ( $\text{CDCl}_3$ , 300 MHz):  $\delta = 7.39$  (d,  $J = 8.7$  Hz, 2 H), 6.84 (d,  $J = 7.8$  Hz, 2 H), 3.82 (s, 3 H), 2.56-2.34 (m, 2 H), 2.29 (brs, 1 H), 1.96-1.85 (m, 2 H), 1.49-1.26 (m, 1 H), 1.18 (d,  $J = 6.9$  Hz, 3 H);  $^{13}\text{C}$  NMR ( $\text{CDCl}_3$ , 75.4 MHz):  $\delta = 159.6, 133.2, 114.1, 113.9, 88.3, 86.2, 72.7, 55.3, 44.0, 36.1, 20.6, 16.2$  ppm; MS (70 eV):  $m/z$  (%): 216.2 (5) [ $\text{M}^+$ ], 127.8 (100); IR (neat):  $\nu = 3378, 2958, 2931, 2869, 2221, 1719, 1508, 1457, 1377, 1091, 835$   $\text{cm}^{-1}$ ; HRMS  $m/z$  (ESI) calcd for  $\text{C}_{14}\text{H}_{16}\text{O}_2\text{Na}$  ( $\text{M} + \text{Na}$ ) $^+$ : 239.10425, found 239.10432; **Cis-2n**:  $^1\text{H}$  NMR ( $\text{CDCl}_3$ , 300 MHz):  $\delta = 7.79$  (d,  $J = 9.0$  Hz, 2 H), 6.83 (d,  $J = 9.0$  Hz, 2 H), 3.87 (s, 3 H), 2.37 (brs, 1 H), 2.15 (q,  $J = 9.9$  Hz, 1 H), 1.96-1.85 (m, 1 H), 1.49-1.26 (m, 3 H), 1.60 (d,  $J = 6.9$  Hz, 3 H).

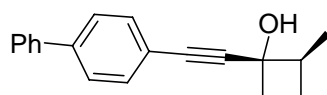

**Trans-2o**

34)

**Trans-1-(4-phenyl-phenyl-ethynyl)-2-methyl cyclobutanol (*trans-2o*):** The reaction of **1o** (52.4 mg, 0.2 mmol), FeCl<sub>2</sub> (0.02 mmol, 2.5 mg, 10 mol%) and 2 mL acetone/nitromethane = 1/1 afforded 33.5 mg (64 %, *trans/cis* = 4:1) of **2o**. **Trans-2o**: solid, mp 102~104 °C (*n*-hexane/ethyl acetate); <sup>1</sup>H NMR (CDCl<sub>3</sub>, 300 MHz): δ = 7.65-7.26 (m, 9 H), 2.55-2.35 (m, 2 H), 2.31 (d, *J* = 2.4 Hz, 1 H), 2.80 (q, *J* = 9.0 Hz, 1 H), 2.00-1.85 (m, 1 H), 1.45-1.30 (m, 1 H), 1.21 (d, *J* = 6.6 Hz, 3 H); <sup>13</sup>C NMR (CDCl<sub>3</sub>, 75.4 MHz): δ = 141.1, 140.3, 132.2, 128.8, 127.6, 127.0, 121.6, 90.4, 86.2, 72.7, 44.0, 36.1, 20.7, 16.2 ppm; MS (70 eV): *m/z* (%): 262.2 (8) [M<sup>+</sup>], 220.1 (100); IR (neat): ν = 3400, 2960, 2925, 2865, 2202, 1486, 1109, 842, 767, 695 cm<sup>-1</sup>; HRMS *m/z* (ESI) calcd for C<sub>19</sub>H<sub>18</sub>ONa (M + Na)<sup>+</sup>: 285.12499, found 285.12485. **Cis-2o**: <sup>1</sup>H NMR (CDCl<sub>3</sub>, 300 MHz): δ = 7.70-7.28 (m, 9 H), 2.77 (q, *J* = 7.2 Hz, 1 H), 2.60-2.40 (m, 1 H), 2.35-2.20 (m, 1 H), 2.15-1.95 (m, 1 H), 2.00 (brs, 1 H), 1.70-1.60 (m, 1 H), 1.16 (d, *J* = 7.2 Hz, 3 H); <sup>13</sup>C NMR (CDCl<sub>3</sub>, 75.4 MHz): δ = 141.1, 140.3, 132.1, 128.8, 127.6, 127.0, 121.7, 104.2, 90.4, 86.2, 72.7, 44.0, 36.1, 20.7, 16.2 ppm;

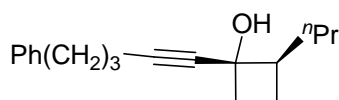

**Trans-2p**

35)

**Trans-1-(5'-phenylpent-1-ynyl)-2-propyl cyclobutanol (*trans-2p*):** The reaction of **1p** (51.2 mg, 0.2 mmol), FeCl<sub>2</sub> (0.02 mmol, 2.5 mg, 10 mol%) and 2 mL acetone/nitromethane = 1/1 afforded 29 mg (75 %, based on the conversion, *trans/cis* = 4:1) of **2p**, and 13 mg (25 %) of **1p** was recovered. **Trans-2p**: liquid; <sup>1</sup>H NMR (CDCl<sub>3</sub>, 300 MHz): δ = 7.40-7.25 (m, 2 H), 7.24-7.17 (m, 3 H), 2.75 (t, *J* = 7.5 Hz, 2 H), 2.46-2.15 (m, 3 H), 2.12 (s, 1 H), 2.04 (q, *J* = 10.2 Hz, 1 H), 1.97-1.75 (m, 3 H), 1.68-1.59 (m, 2 H), 1.52-1.20 (m, 4 H), 0.91 (t, *J* = 6.9 Hz, 3 H); <sup>13</sup>C NMR (CDCl<sub>3</sub>, 75.4 MHz): δ = 141.6, 128.5, 128.3, 125.9, 86.1, 81.5, 72.0, 48.9, 36.1, 34.8, 34.1, 30.4, 20.2, 19.2, 18.2, 14.3 ppm; MS (70 eV): *m/z* (%): 258.3 (3) [M<sup>+</sup> + 2], 144.1 (100); IR (neat): ν = 3356, 2975, 2927, 2219, 1715, 1367, 1073, 1030, 929, 885, 807 cm<sup>-1</sup>; HRMS *m/z* (ESI) calcd for C<sub>18</sub>H<sub>25</sub>O (M + H)<sup>+</sup>: 257.18999, found 257.19039.

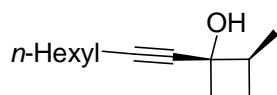

**trans-2q**

36)

**Trans-1-(oct-1-ynyl)-2-methyl cyclobutanol (*trans-2q*):** The reaction of **1q** (38.8 mg, 0.2 mmol), FeCl<sub>2</sub> (0.02 mmol, 2.5 mg, 10 mol%) and 2 mL acetone/nitromethane = 1/1 afforded 21 mg (54 %, *trans/cis* = 4:1) of **2q**. **Trans-2q**: liquid; <sup>1</sup>H NMR (CDCl<sub>3</sub>, 300 MHz): δ = 2.45-2.30 (m, 1 H), 2.36 (t, *J* = 6.9 Hz, 3 H), 2.11 (s, 1 H), 2.04 (q, *J* = 9.9 Hz, 1 H), 1.90-1.75 (m, 1 H), 1.52 (q, *J* = 7.2 Hz, 2 H), 1.47-1.15 (m, 7

H), 1.09 (d,  $J = 6.6$  Hz, 3 H), 0.89 (t,  $J = 6.6$  Hz, 3 H);  $^{13}\text{C}$  NMR ( $\text{CDCl}_3$ , 75.4 MHz):  $\delta = 87.0, 80.7, 72.4, 43.8, 36.2, 31.3, 28.8, 28.5, 22.6, 20.6, 18.7, 16.0, 14.0$  ppm; MS (70 eV):  $m/z$  (%): 194.2 (5) [ $\text{M}^+$ ], 177.1 (100); IR (neat):  $\nu = 3443, 2958, 2930, 2860, 2225, 1725, 1458, 1378, 1260, 1100$   $\text{cm}^{-1}$ ; HRMS  $m/z$  (ESI) calcd for  $\text{C}_{13}\text{H}_{23}\text{O}$  ( $\text{M} + \text{H}$ ) $^+$ : 195.17434, found 195.17426.

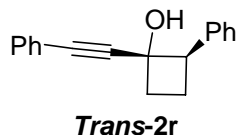

37)

**Trans-1-(Phenylethynyl)-2-phenyl cyclobutanol (trans-2r):** The reaction of **1r** (49.6 mg, 0.2 mmol),  $\text{FeCl}_2$  (0.02 mmol, 2.5 mg, 10 mol%) and 2 mL acetone/nitromethane = 1/1 afforded 2.3 mg (5%, *trans/cis* > 99:1) of **2r** and 43.8 mg (86%) of **3r**. **Trans-2r:** liquid;  $^1\text{H}$  NMR ( $\text{CDCl}_3$ , 300 MHz):  $\delta = 7.50\text{--}7.26$  (m, 5 H), 7.25–7.01 (m, 5 H), 3.72 (t,  $J = 9.6$  Hz, 1 H), 3.05–2.44 (m, 2 H), 2.35 (q,  $J = 10.5$  Hz, 1 H), 2.18–2.00 (m, 2 H);  $^{13}\text{C}$  NMR ( $\text{CDCl}_3$ , 75.4 MHz):  $\delta = 141.6, 131.6, 128.1, 127.9, 127.7, 126.7, 123.4, 91.4, 79.6, 78.2, 19.9, 14.5, 13.3$  (one carbon missing as a result of overlap) ppm; MS (70 eV):  $m/z$  (%): 248.1 (51) [ $\text{M}^+$ ], 91.2 (100); IR (neat):  $\nu = 3408, 3079, 3059, 2973, 2927, 2875, 2225, 1949, 1721, 1601, 1495, 1446, 1122, 1080, 761, 702$   $\text{cm}^{-1}$ ; HRMS  $m/z$  (ESI) calcd for  $\text{C}_{18}\text{H}_{17}\text{O}$  ( $\text{M} + \text{H}$ ) $^+$ : 249.12739, found 249.12704.

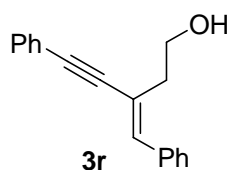

38)

**(E)-3-Benzylidene-3-phenylethynyl propanol (3r):** liquid;  $^1\text{H}$  NMR ( $\text{CDCl}_3$ , 300 MHz):  $\delta = 7.80$  (d,  $J = 6.9$  Hz, 2 H), 7.43–7.52 (m, 2 H), 7.40–7.24 (m, 6 H), 6.69 (s, 1H), 3.97 (t,  $J = 6.0$  Hz, 2 H), 2.67 (t,  $J = 6.0$  Hz, 2 H), 1.67 (s, 1 H);  $^{13}\text{C}$  NMR ( $\text{CDCl}_3$ , 75.4 MHz):  $\delta = 136.8, 136.3, 131.5, 128.5, 128.4, 128.2, 128.1, 123.1, 118.1, 96.3, 88.8, 61.3, 42.5$  (one carbon missing as a result of overlap) ppm; MS (70 eV):  $m/z$  (%): 248.1 (54) [ $\text{M}^+$ ], 215.1 (100); IR (neat):  $\nu = 3359, 3060, 2953, 2197, 1698, 1598, 1490, 1049, 1027, 755, 691$   $\text{cm}^{-1}$ ; HRMS  $m/z$  (ESI) calcd for  $\text{C}_{18}\text{H}_{17}\text{O}$  ( $\text{M} + \text{H}$ ) $^+$ : 249.12739, found 249.12704.

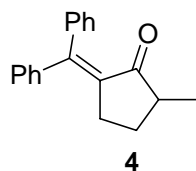

39)

**2-(diphenylmethylene)-5-methylcyclopentanone (4)** was synthesized according to literature procedure<sup>3</sup>

DMF (5 mL), Pd(OAc)<sub>2</sub> (11 mg, 0.05 mmol), PPh<sub>3</sub> (26 mg, 0.1 mmol), iodobenzene (204 mg, 1.0 mmol), *i*-Pr<sub>2</sub>NEt (130 mg, 1.0 mmol), *n*-Bu<sub>4</sub>NCl (277 mg, 1.0 mmol), and **1a** (93 mg, 0.5 mmol) were placed in a standard Schlenk tube under N<sub>2</sub> atmosphere. The Schlenk tube was flushed with N<sub>2</sub> and heated in an oil bath at 80 °C for 12 h. The reaction was monitored by TLC to establish completion. The reaction mixture was cooled, diluted with 30 mL of diethyl ether, washed with 40 mL of saturated NaCl, dried (Na<sub>2</sub>SO<sub>4</sub>), and filtered. The solvent was evaporated under reduced pressure and the product was isolated by chromatography on a silica gel column to afford 44 mg (67%) 2-(diphenylmethylene)-5-methylcyclopentanone (**4**): solid, mp 84–86 °C (*n*-hexane/ethyl acetate); <sup>1</sup>H NMR (CDCl<sub>3</sub>, 300 MHz): δ = 7.45–7.27 (m, 6 H), 7.26–7.16 (m, 2 H), 7.15–7.09 (m, 2 H), 2.80–2.68 (m, 2 H), 2.41–2.13 (m, 2 H), 1.50–1.34 (m, 1 H), 1.13 (d, *J* = 6.6 Hz, 3 H); <sup>13</sup>C NMR (CDCl<sub>3</sub>, 75.4 MHz): δ = 208.1, 148.5, 141.8, 140.1, 133.8, 129.4, 129.2, 128.2, 128.0, 127.7, 45.0, 30.4, 19.2, 14.9 (one carbon missing as a result of overlap) ppm; MS (70 eV): *m/z* (%): 262.3 (64) [M<sup>+</sup>], 261.3 (100); IR (neat): ν = 2960, 2925, 2868, 1710, 1592, 1443, 1190, 700 cm<sup>-1</sup>; HRMS *m/z* (ESI) calcd for C<sub>19</sub>H<sub>19</sub>O (M + H)<sup>+</sup>: 263.14304, found 263.14325.

#### Reference:

- (1) Zhang, J. L.; Schmalz, H. G. *Angew. Chem. Int. Ed.* **2006**, *45*, 6704-6707
- (2) Eckhardt, M.; Fu, G. C. *J. Am. Chem. Soc.* **2003**, *125*, 13642-13643.
- (3) Larock, R. C.; Reddy, C. K. *Org. Lett.* **2000**, *2*, 3325-3327



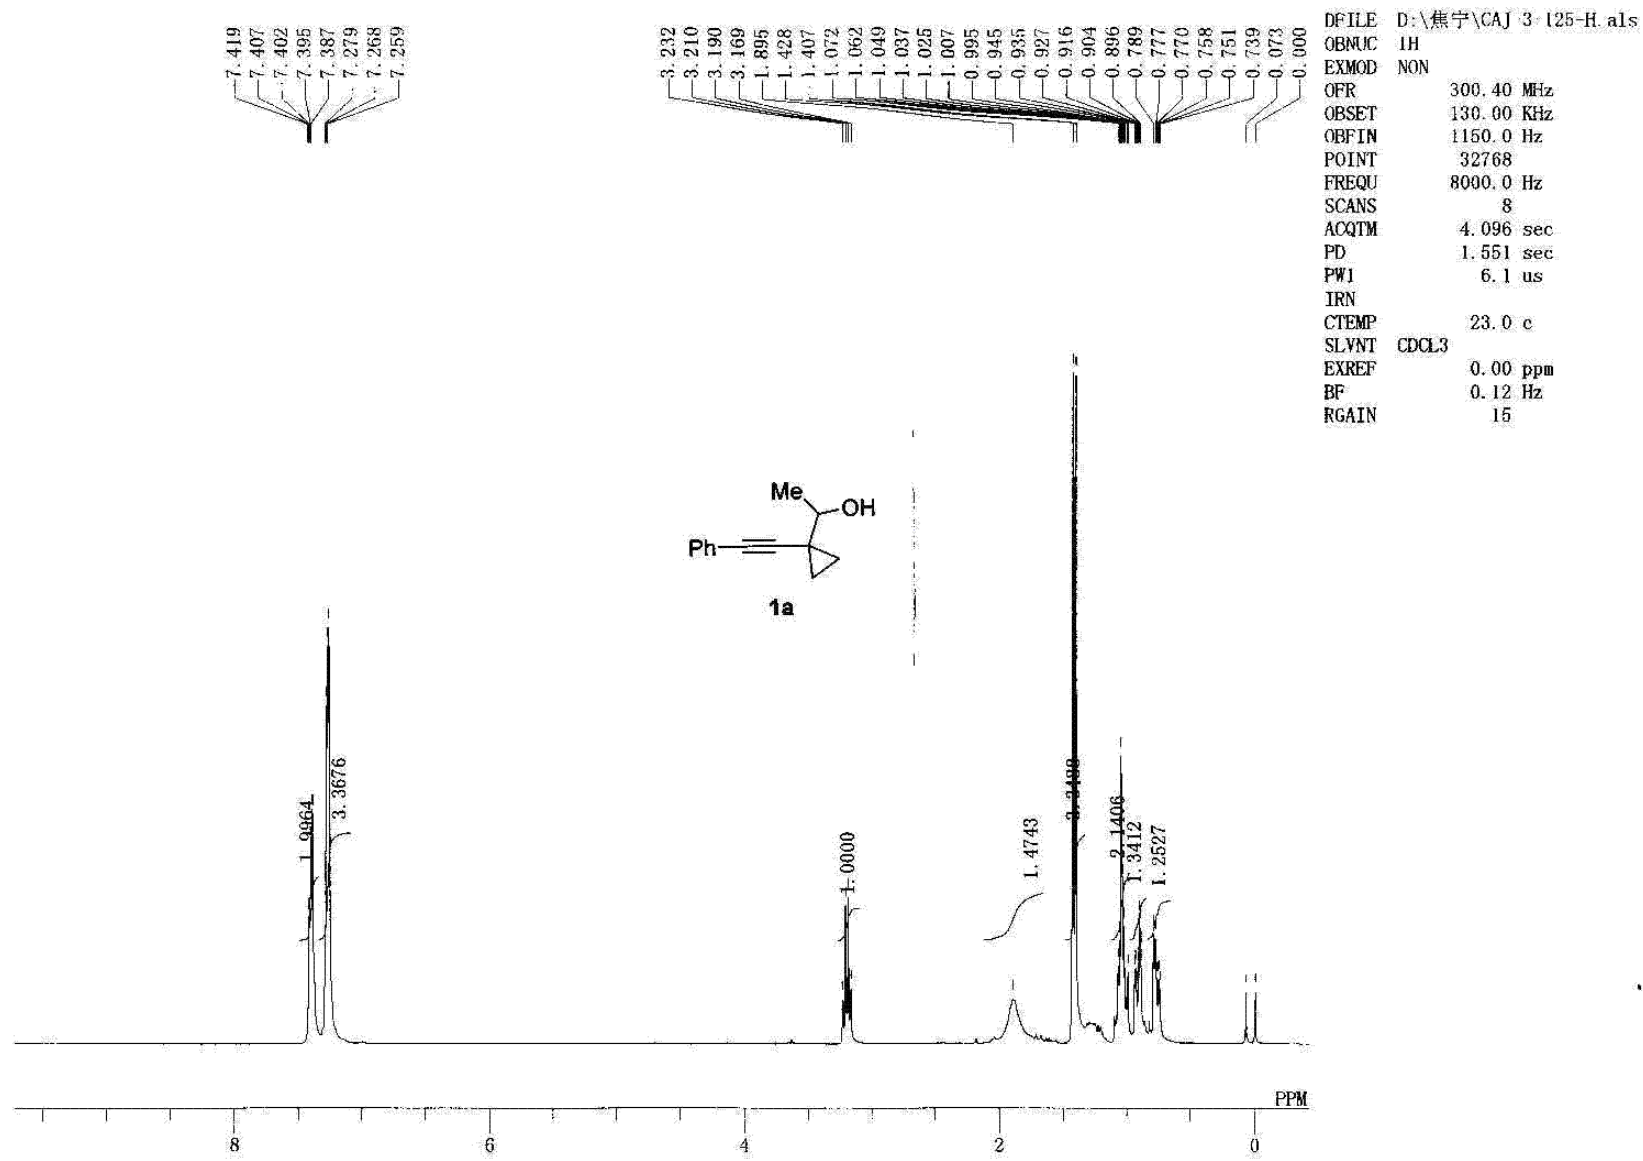

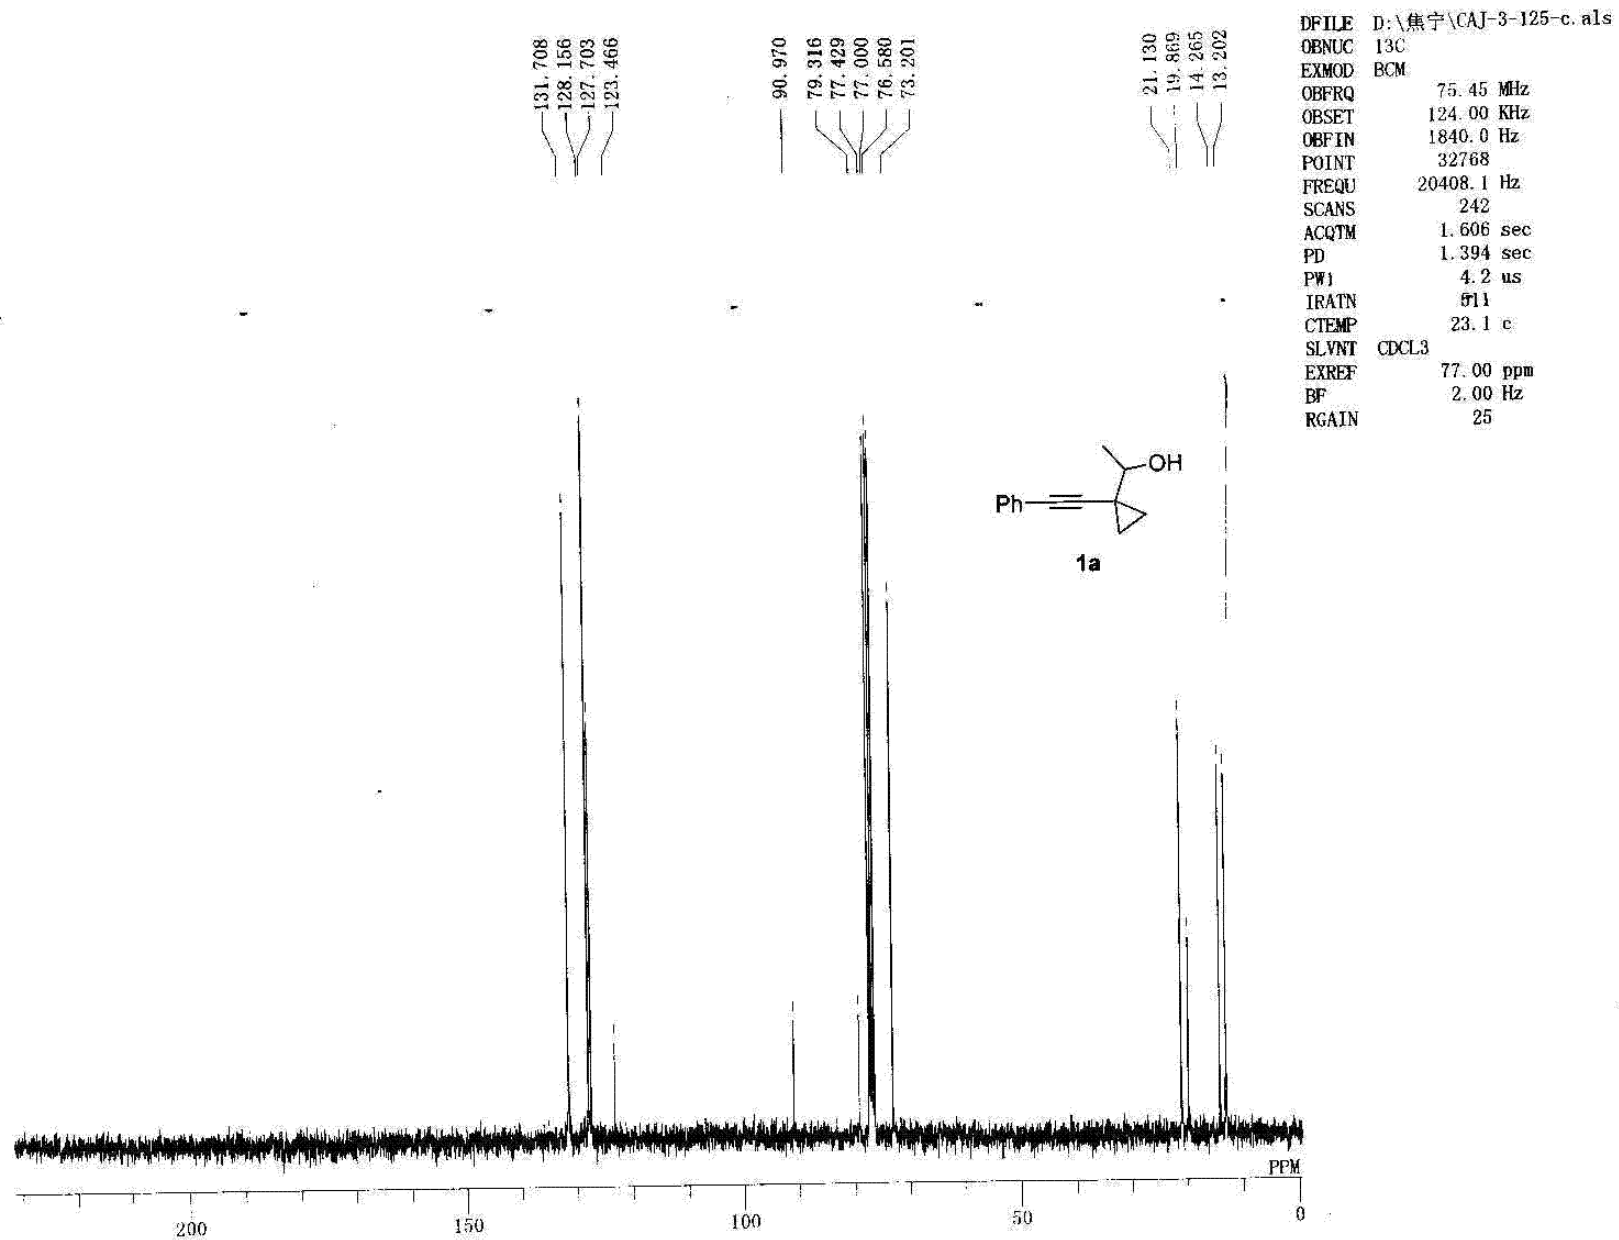

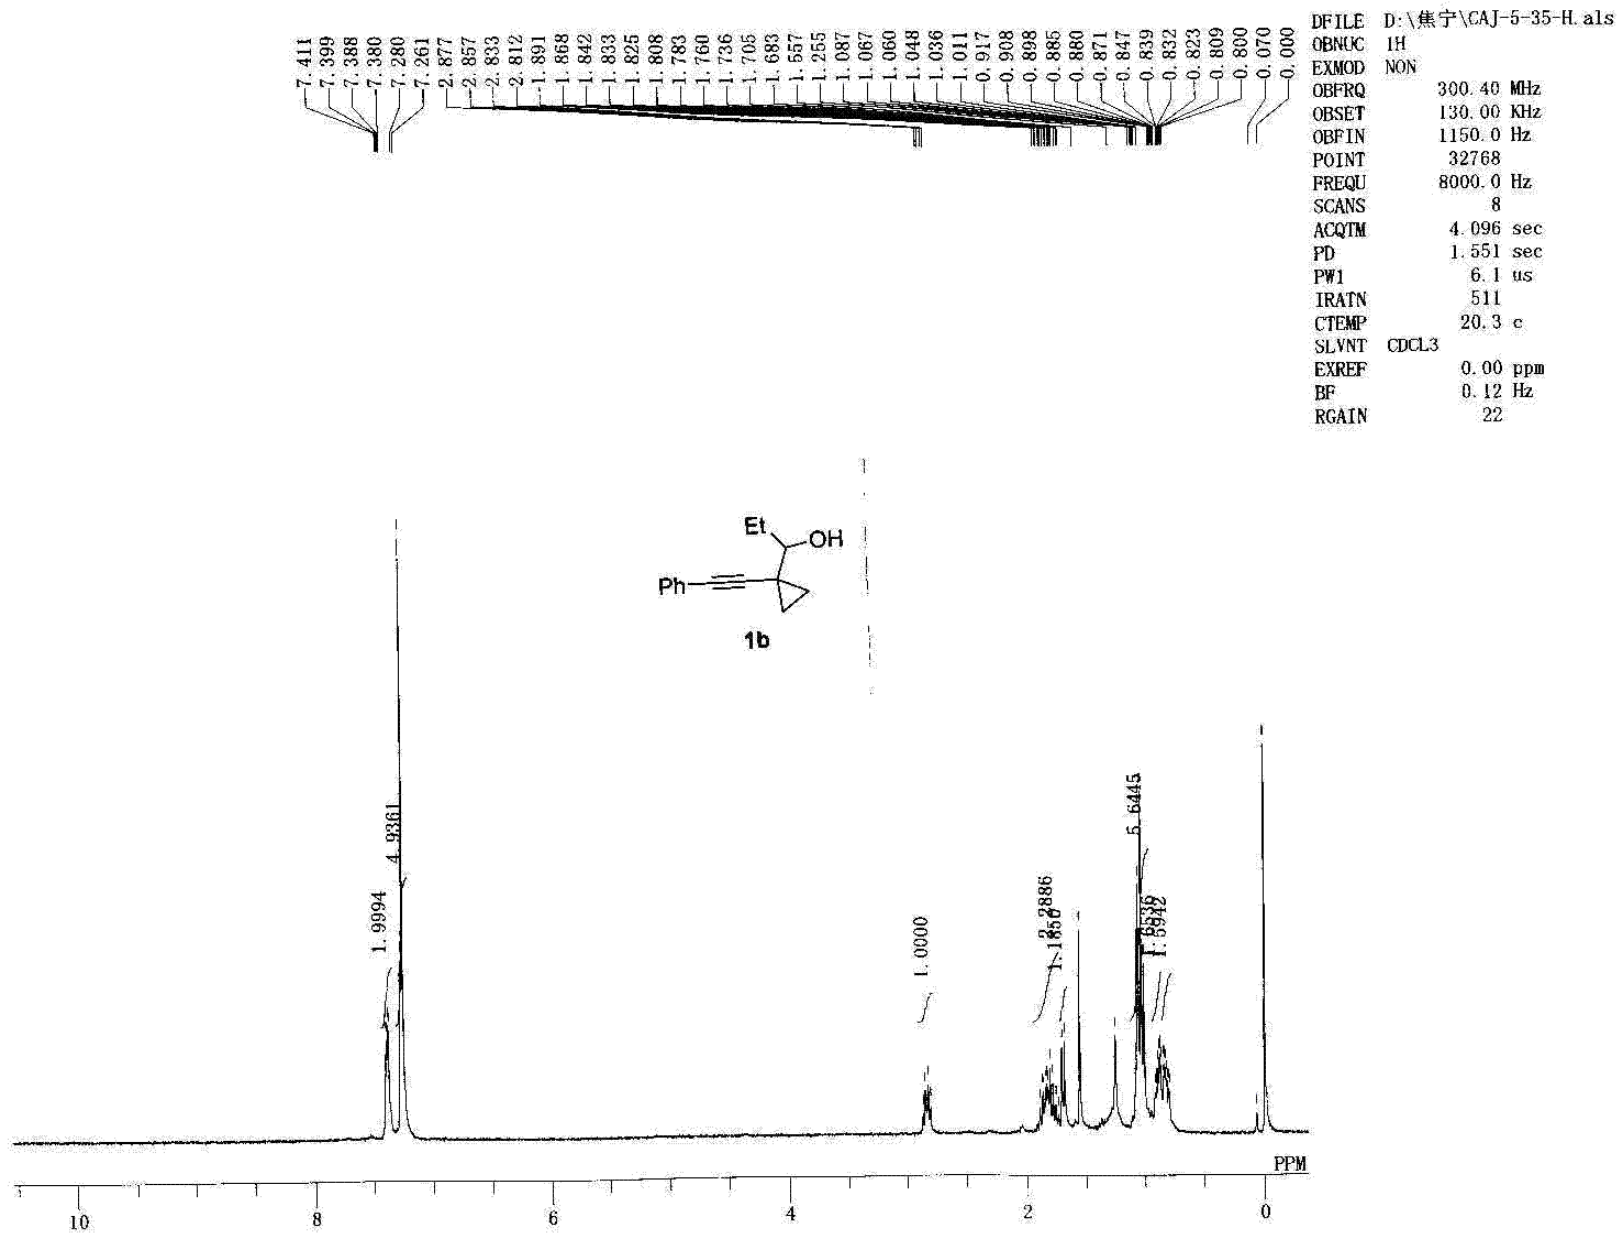

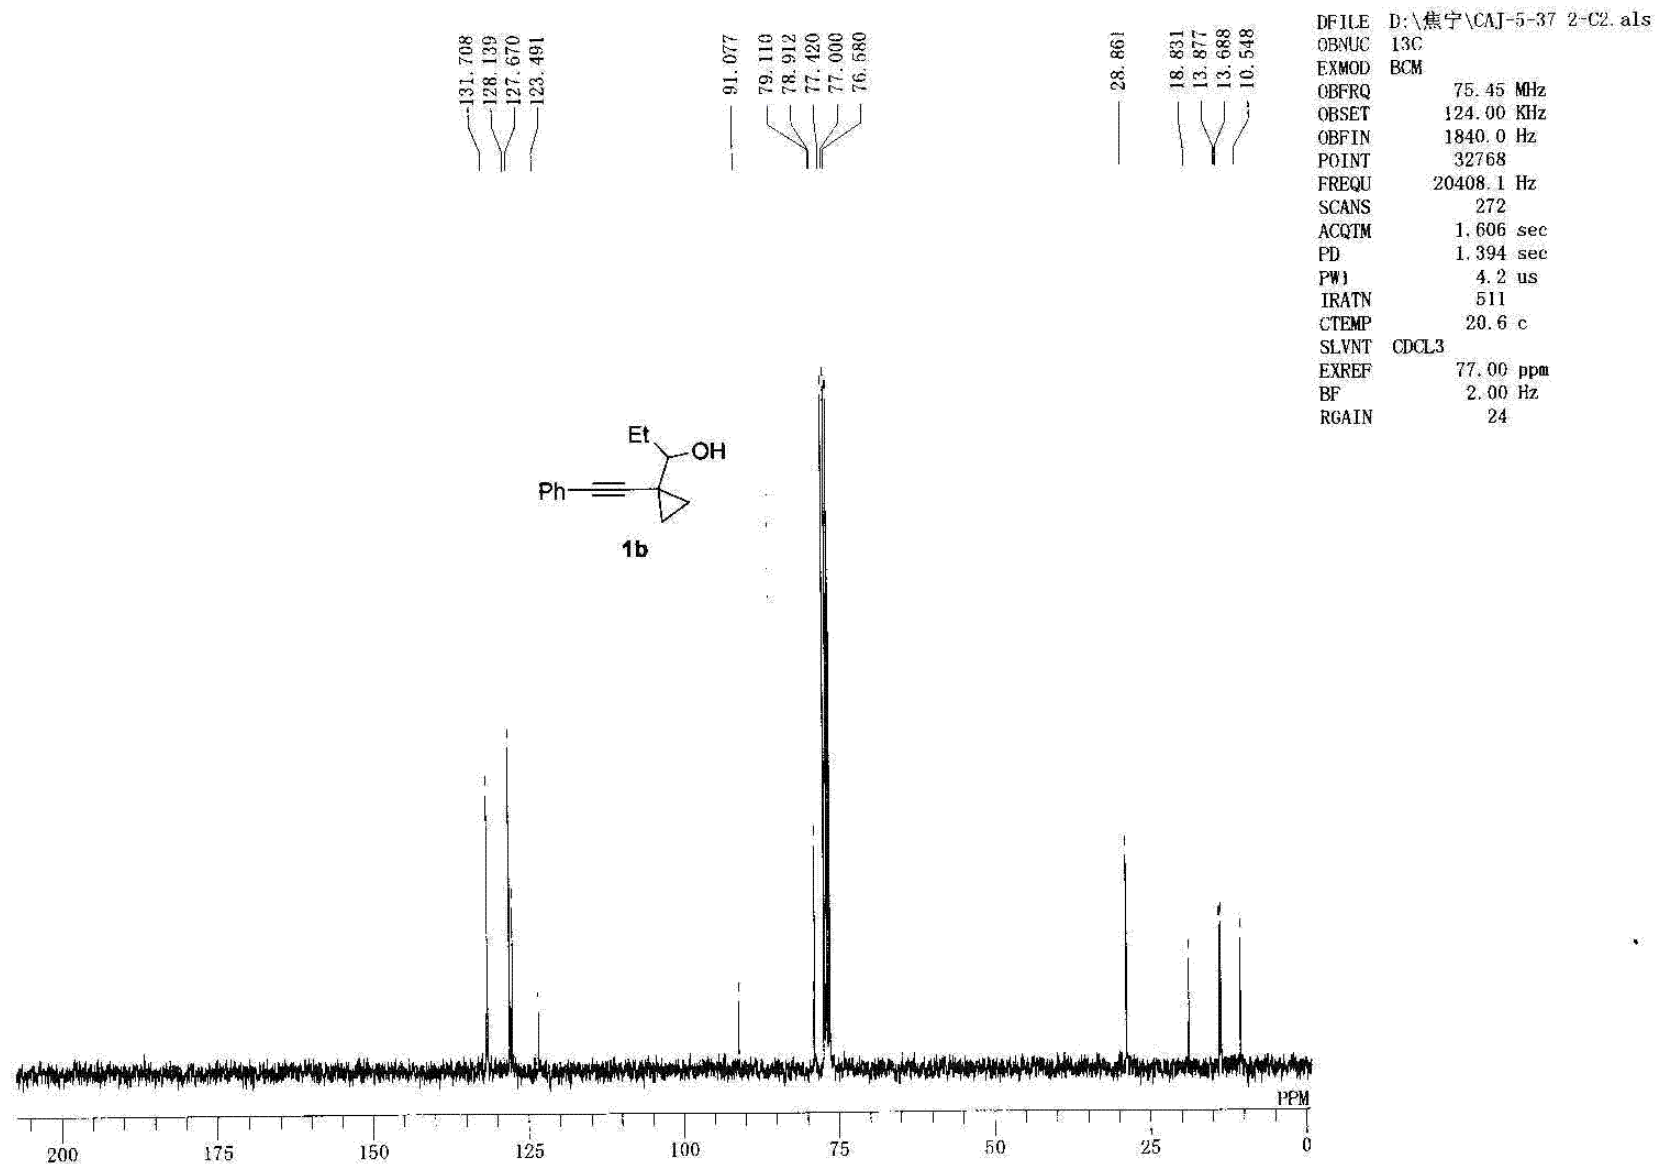

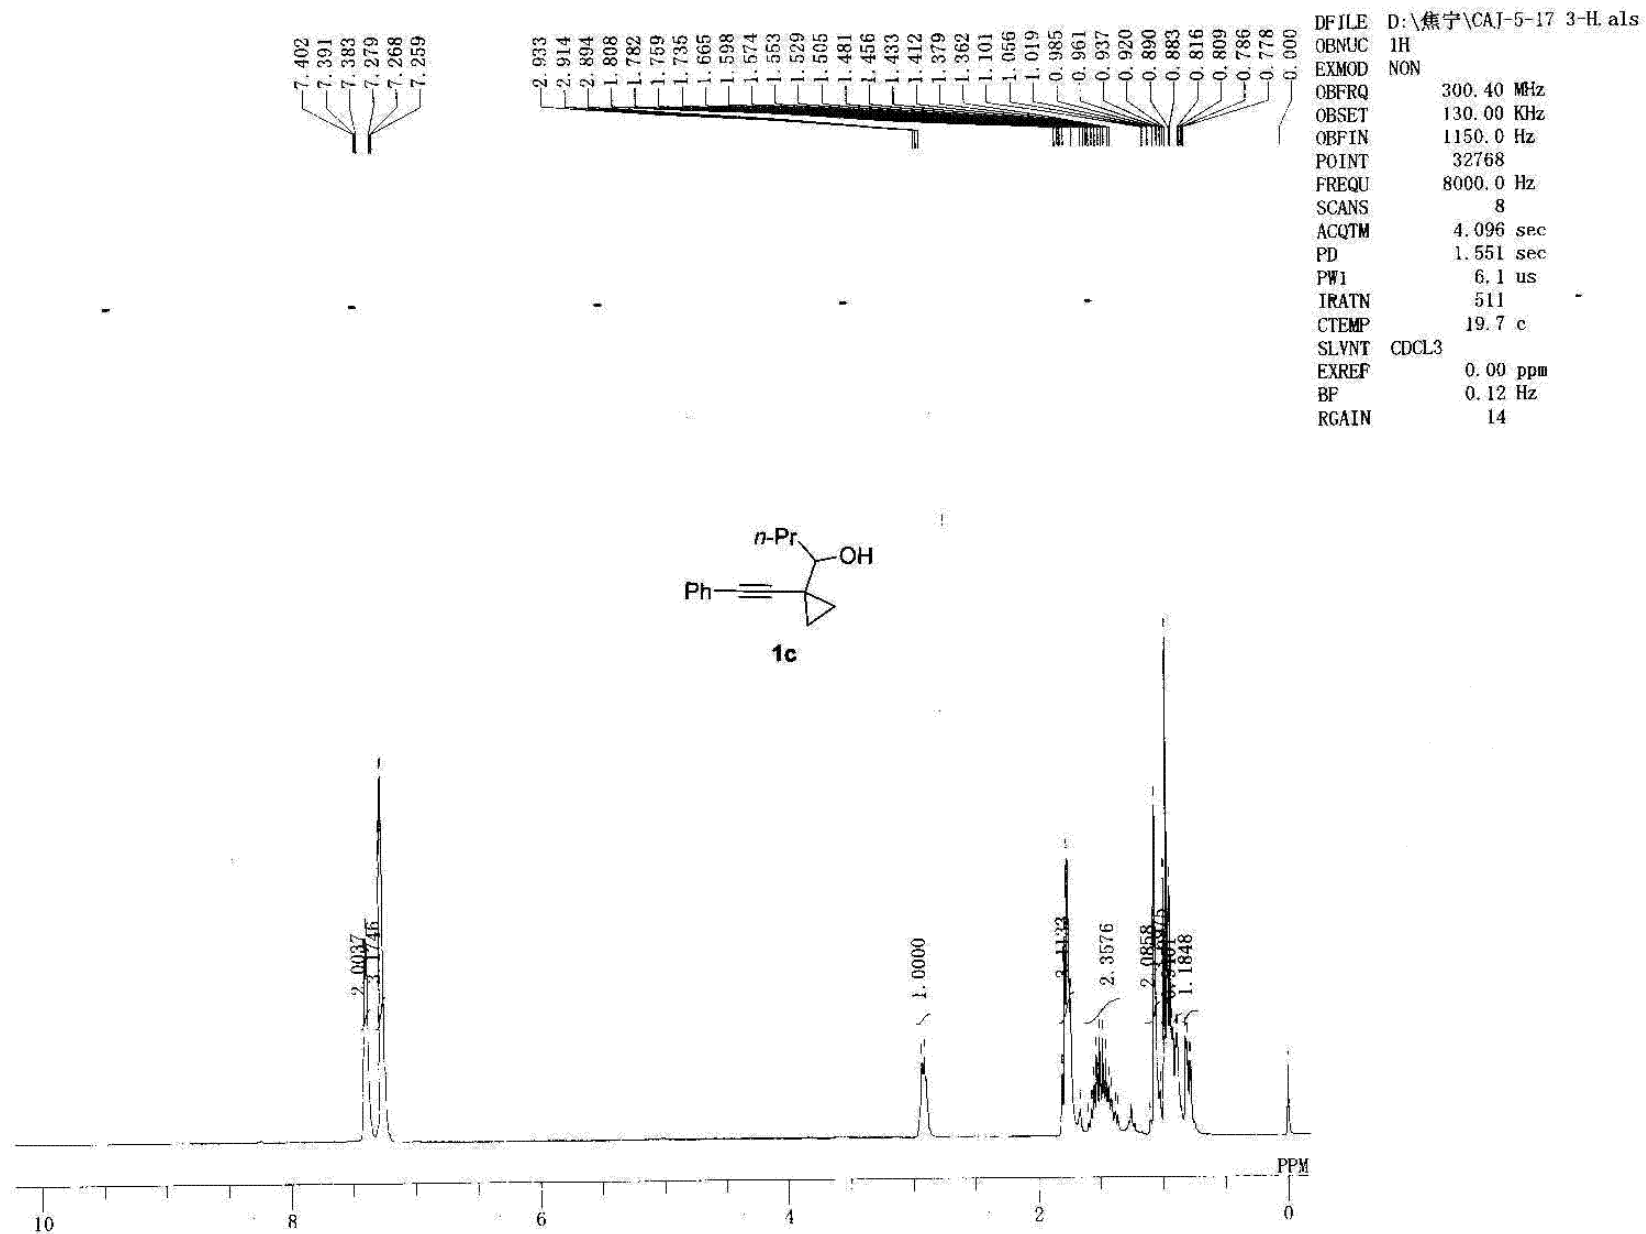

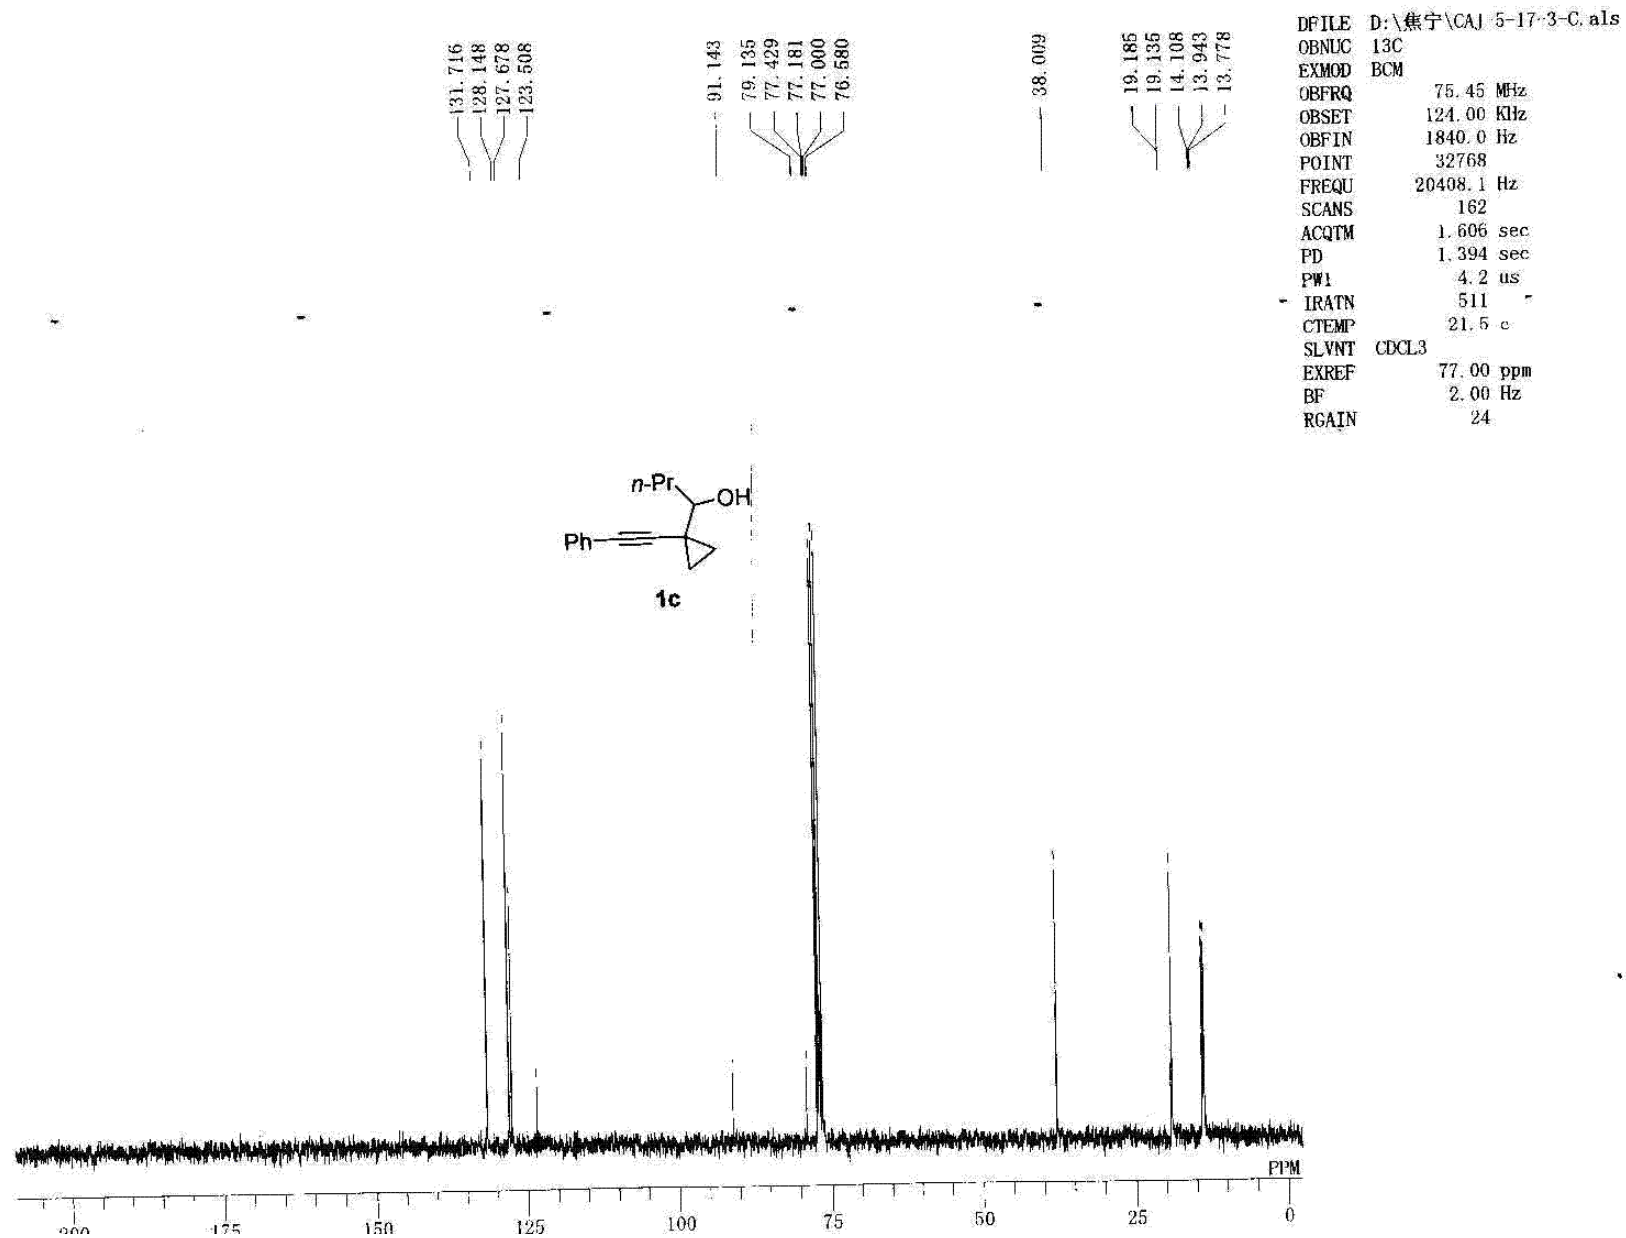

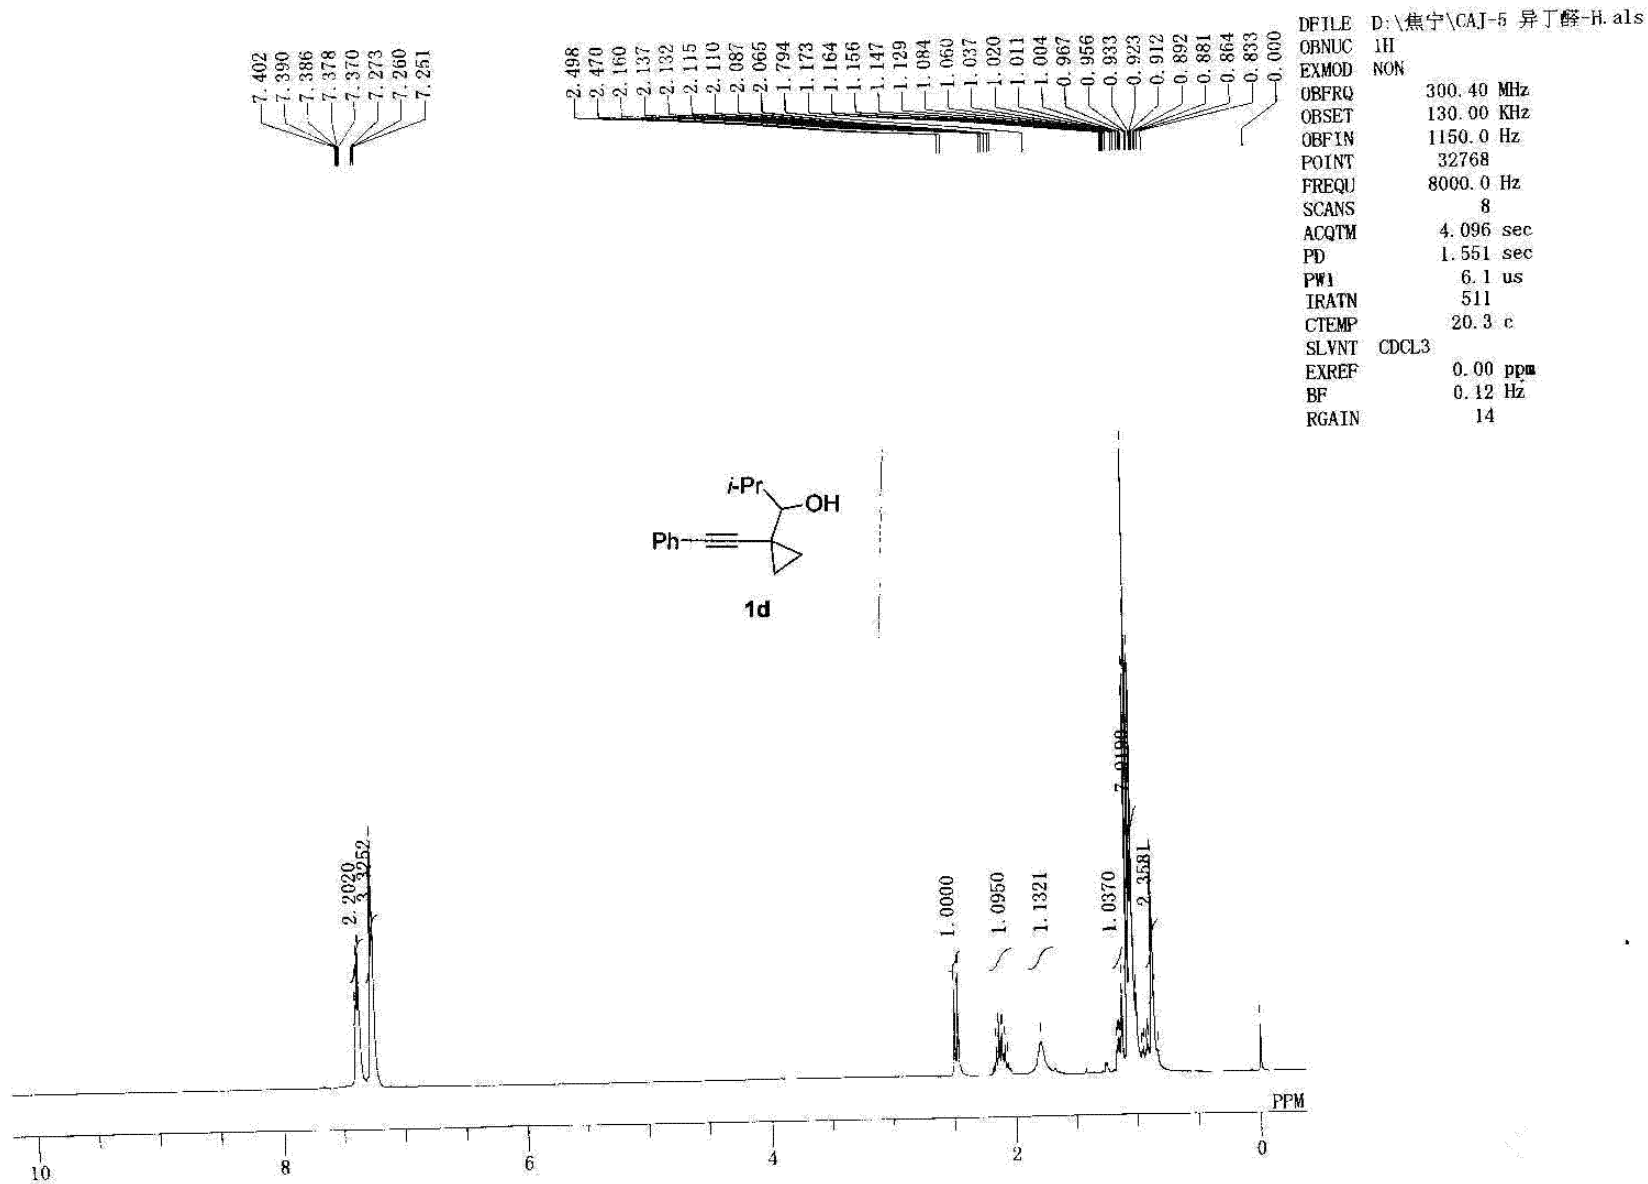

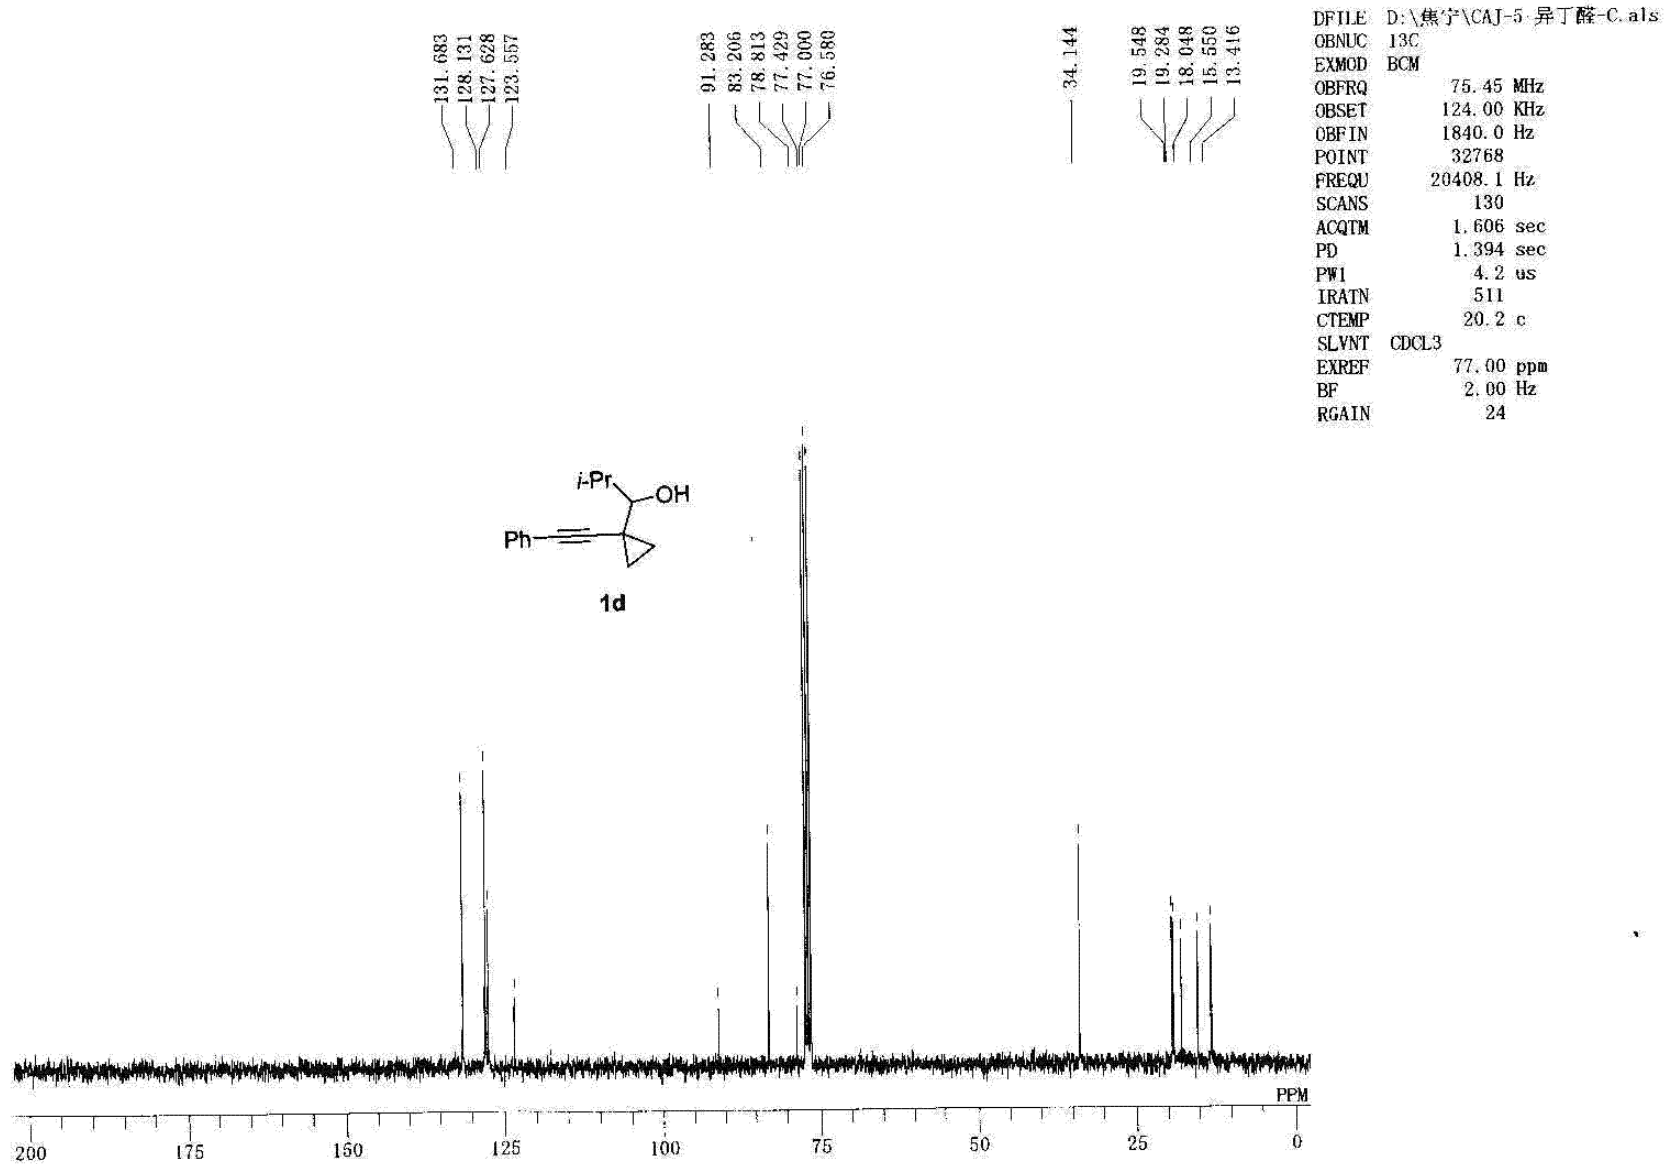



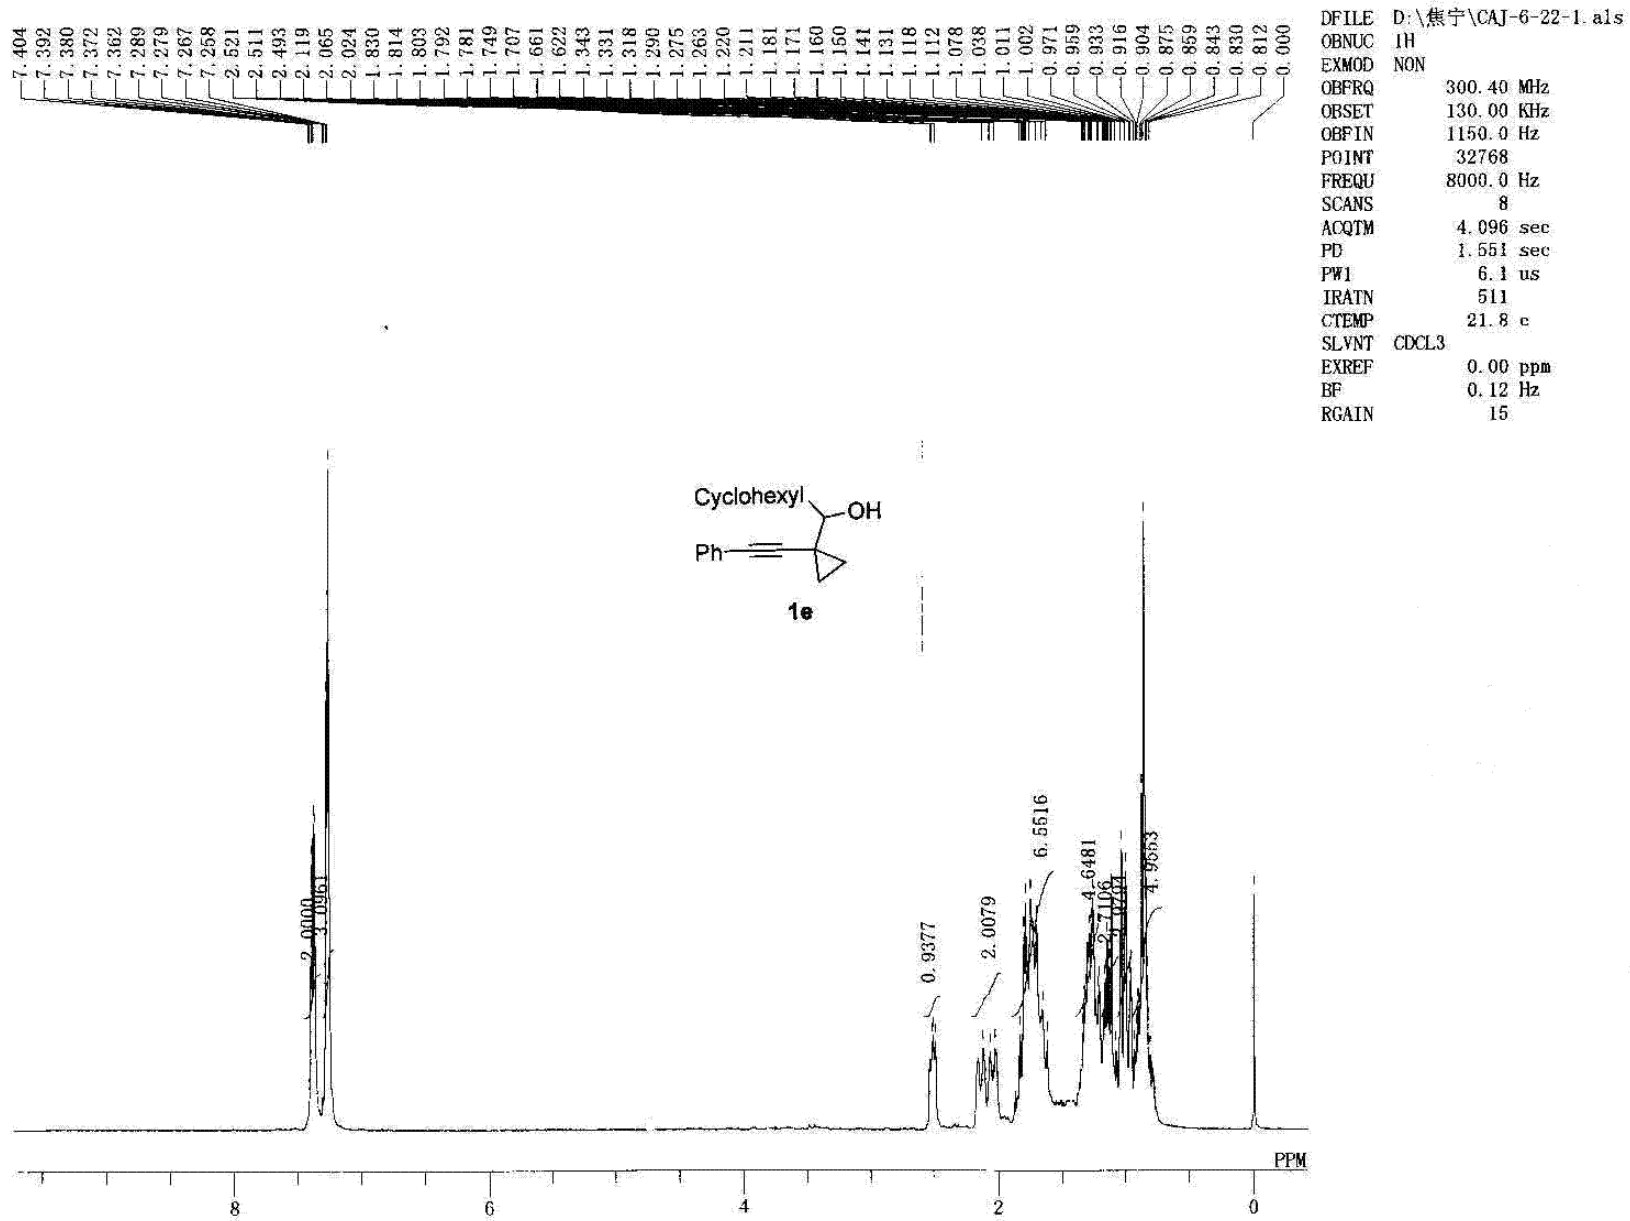

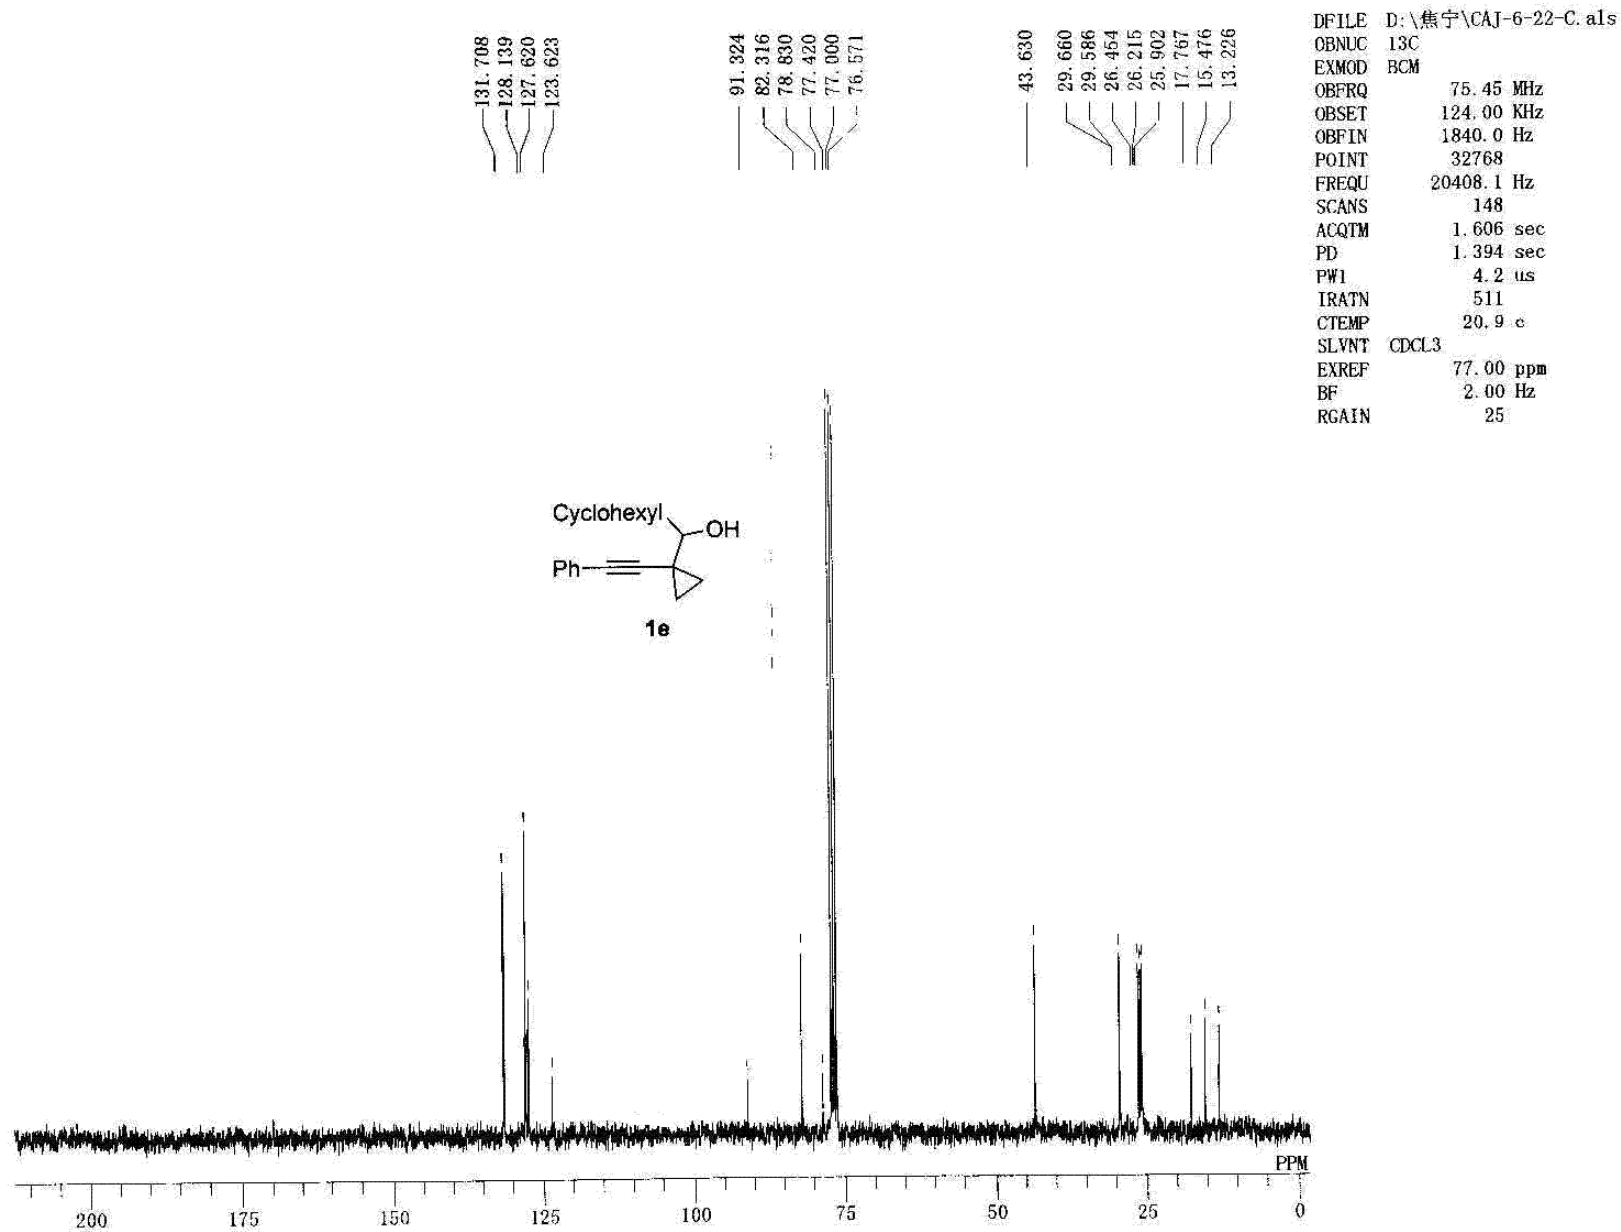

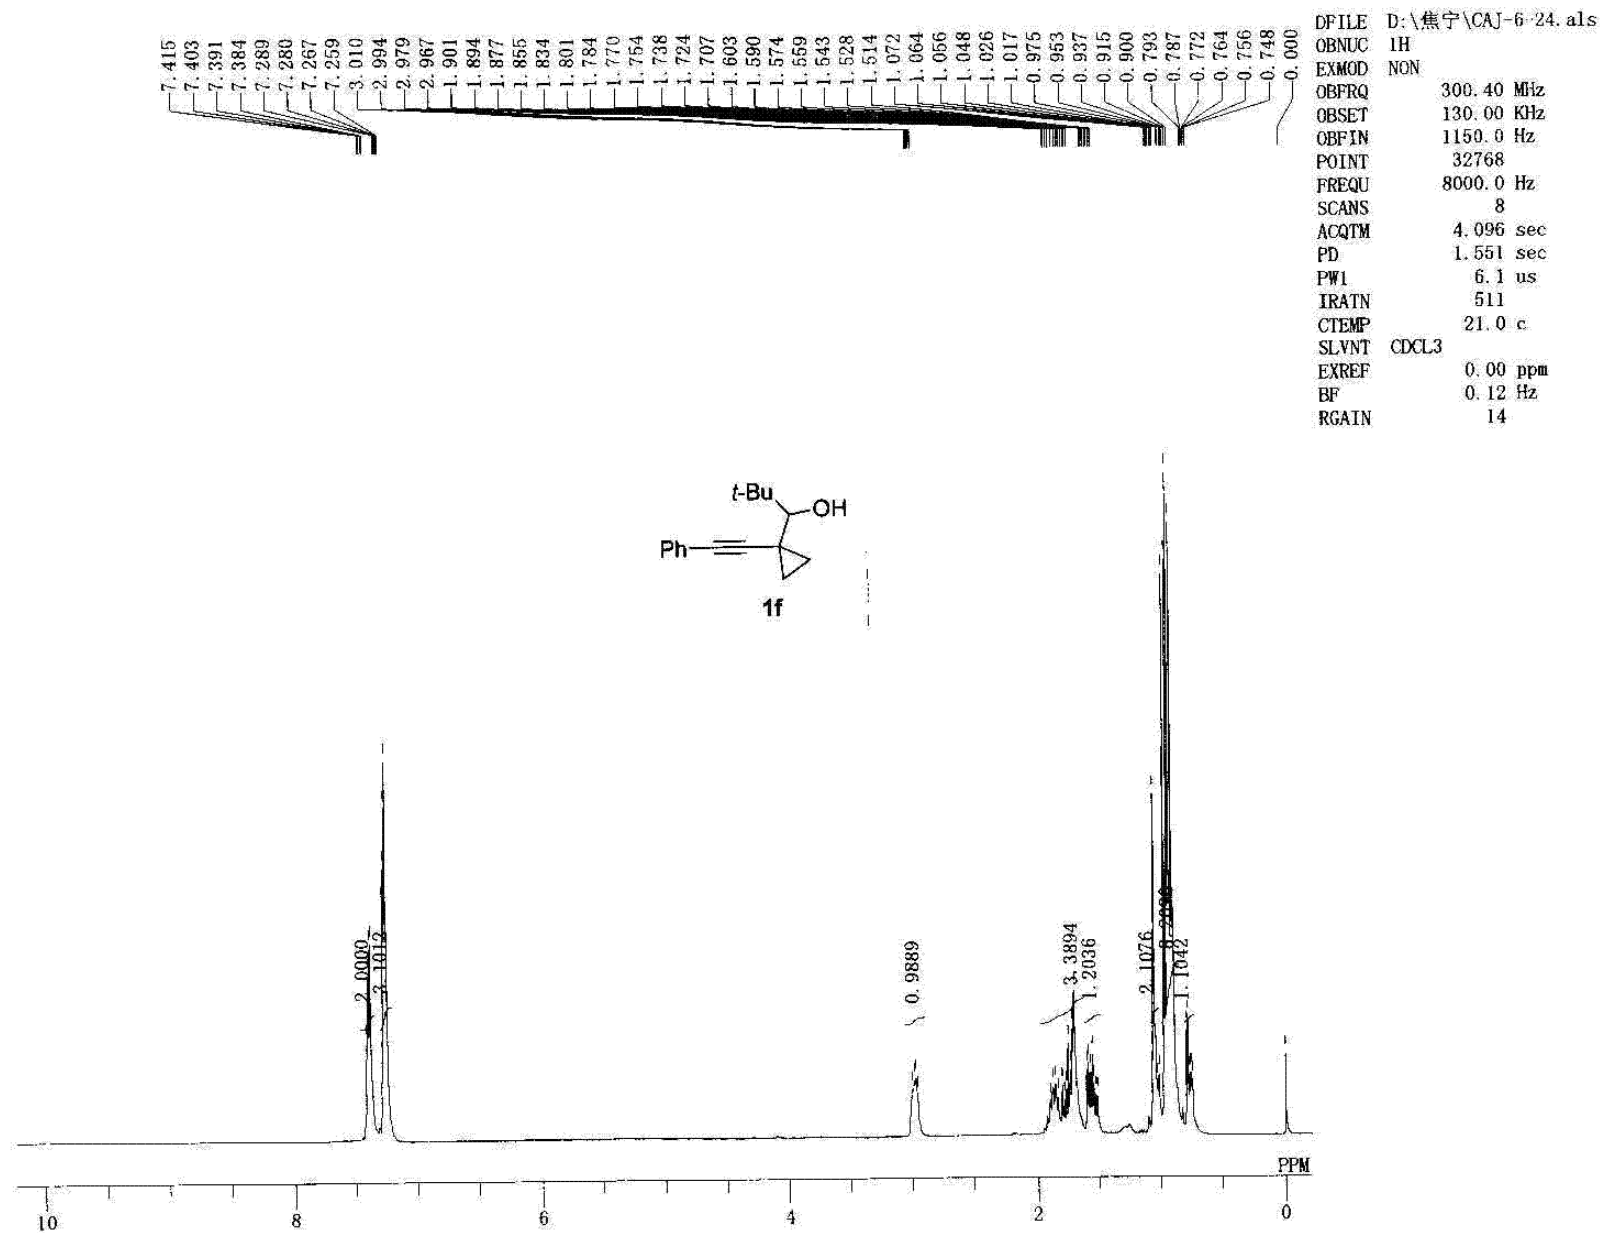

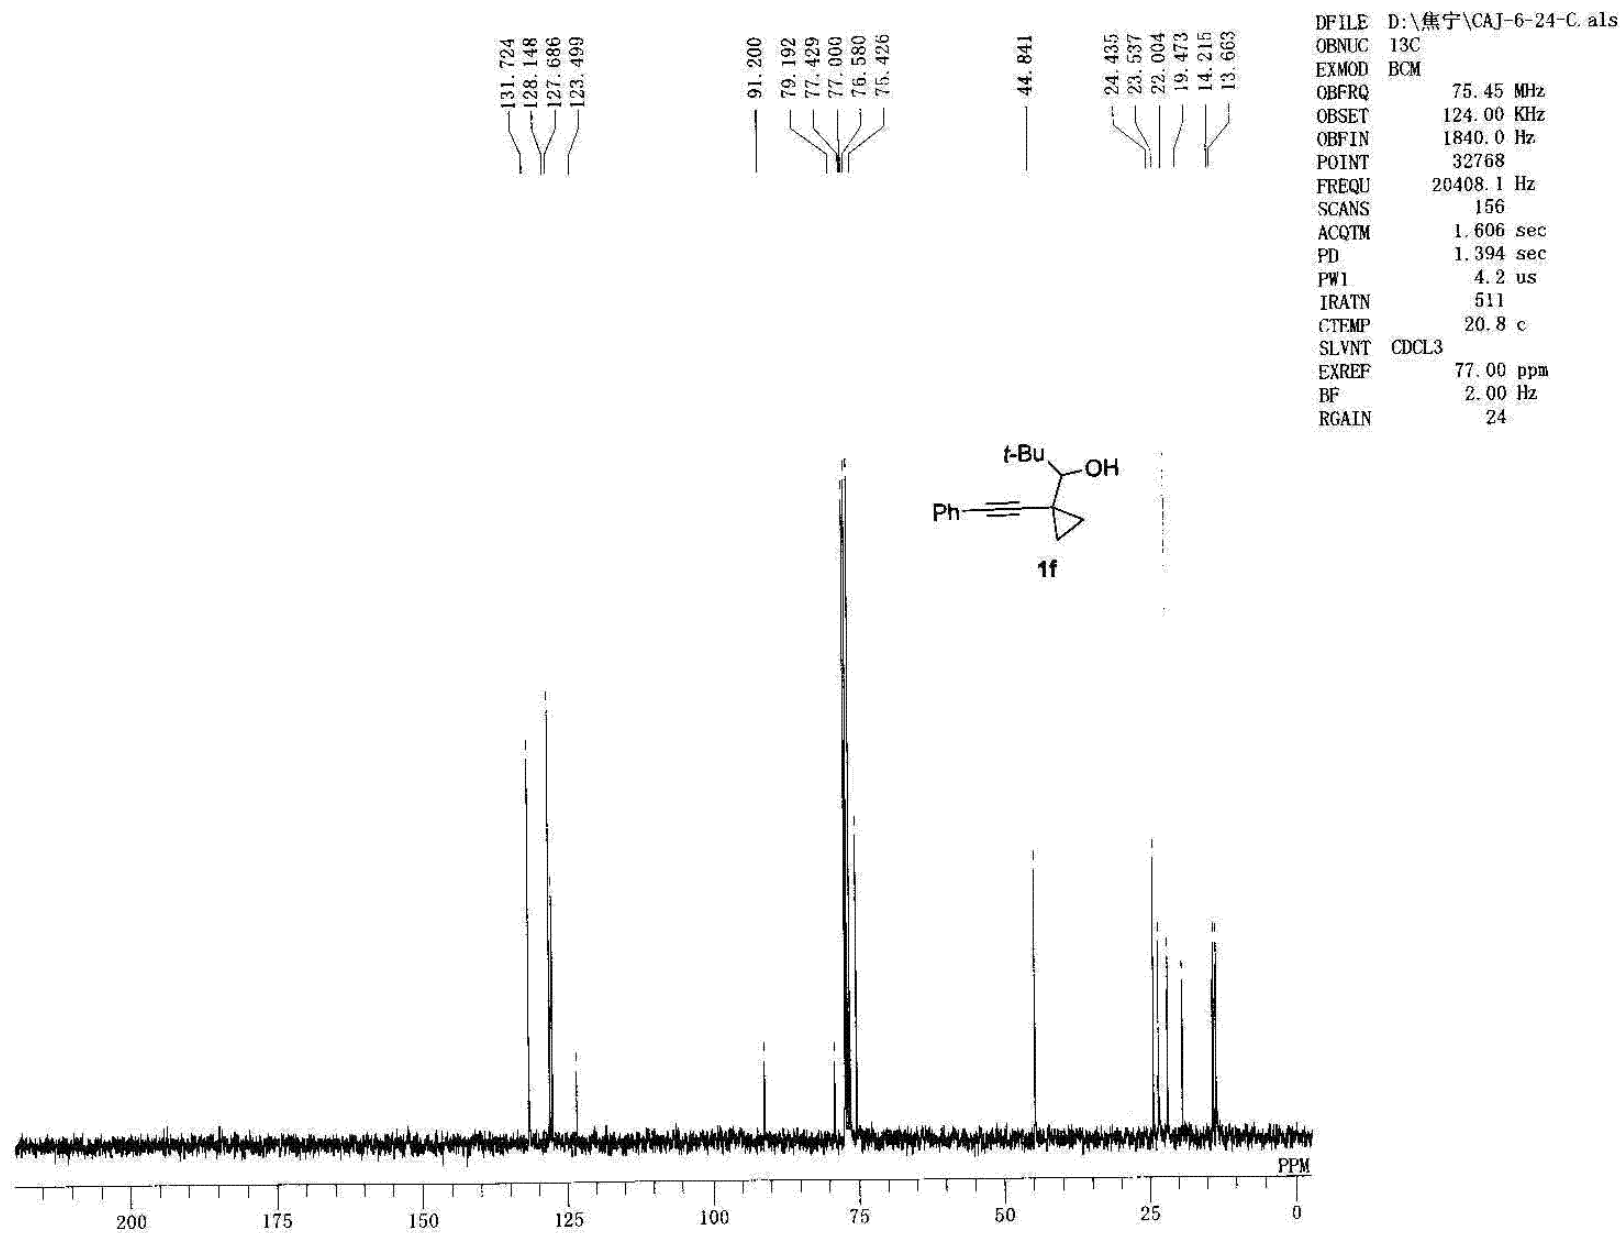

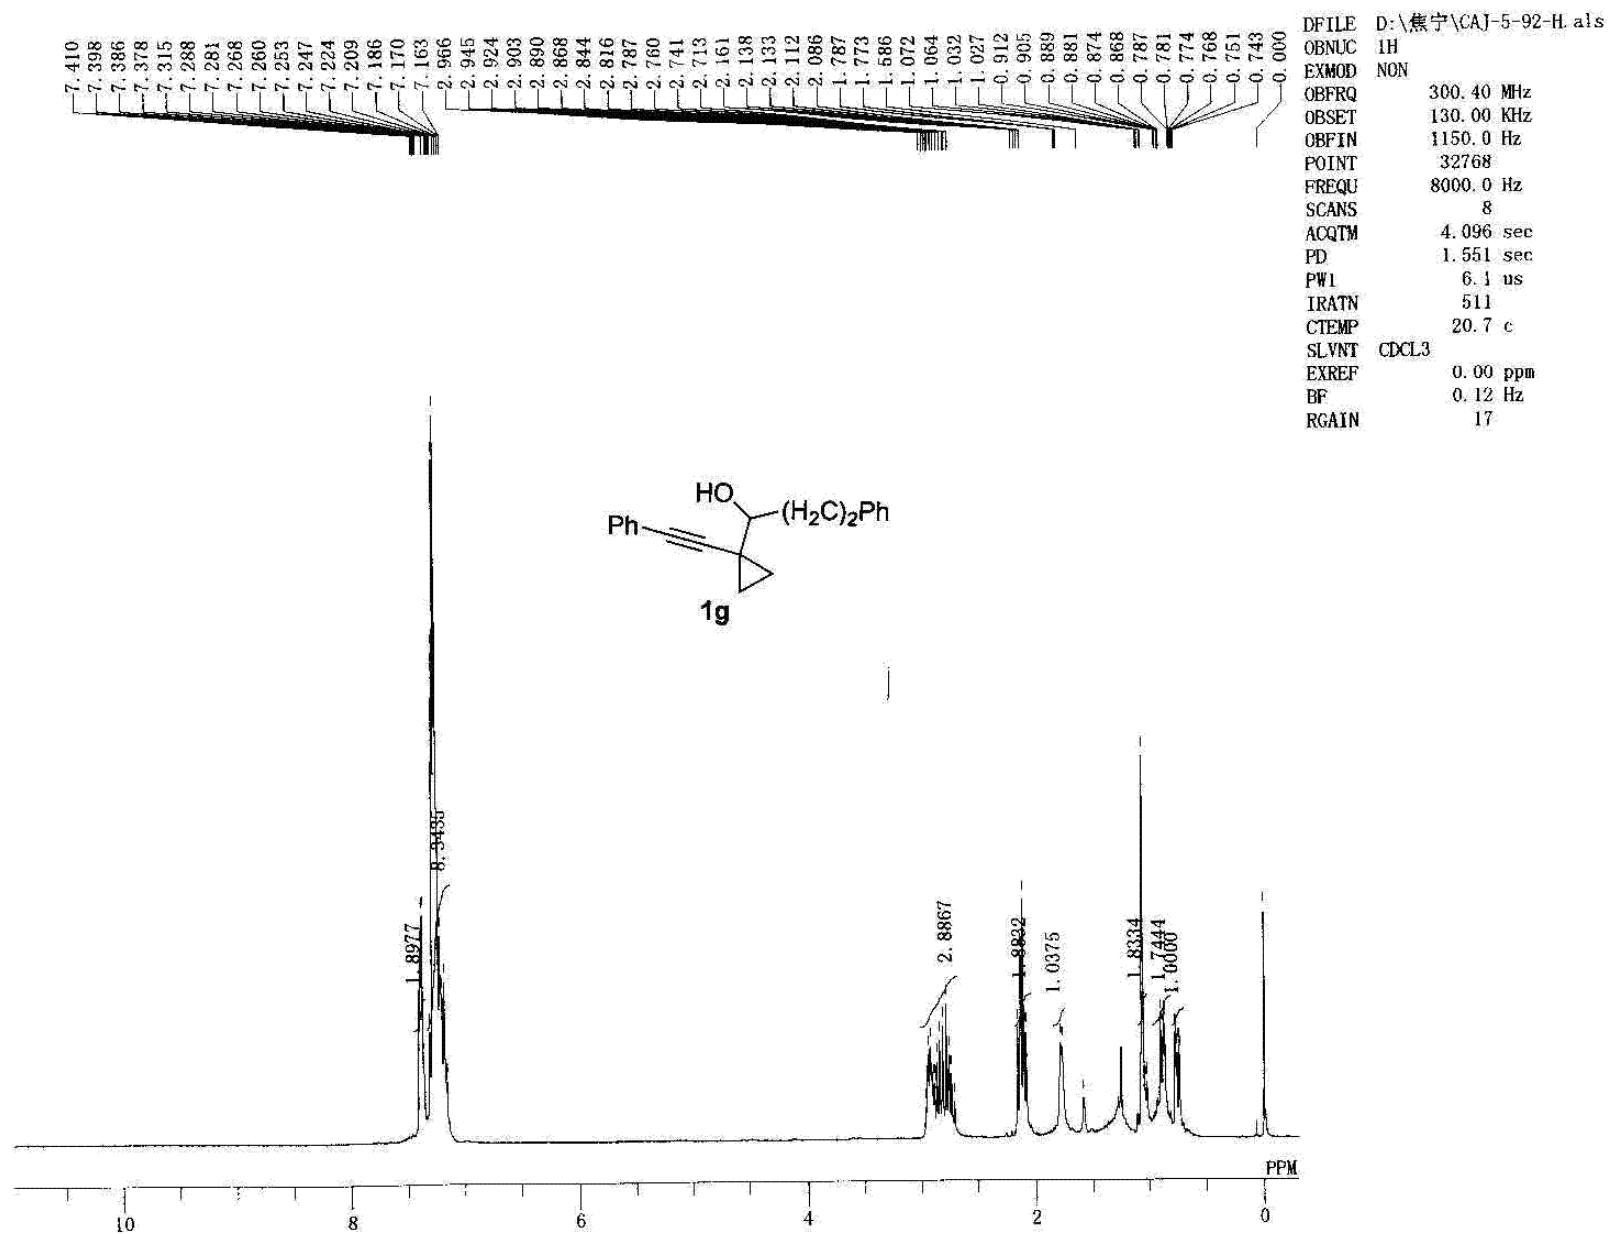

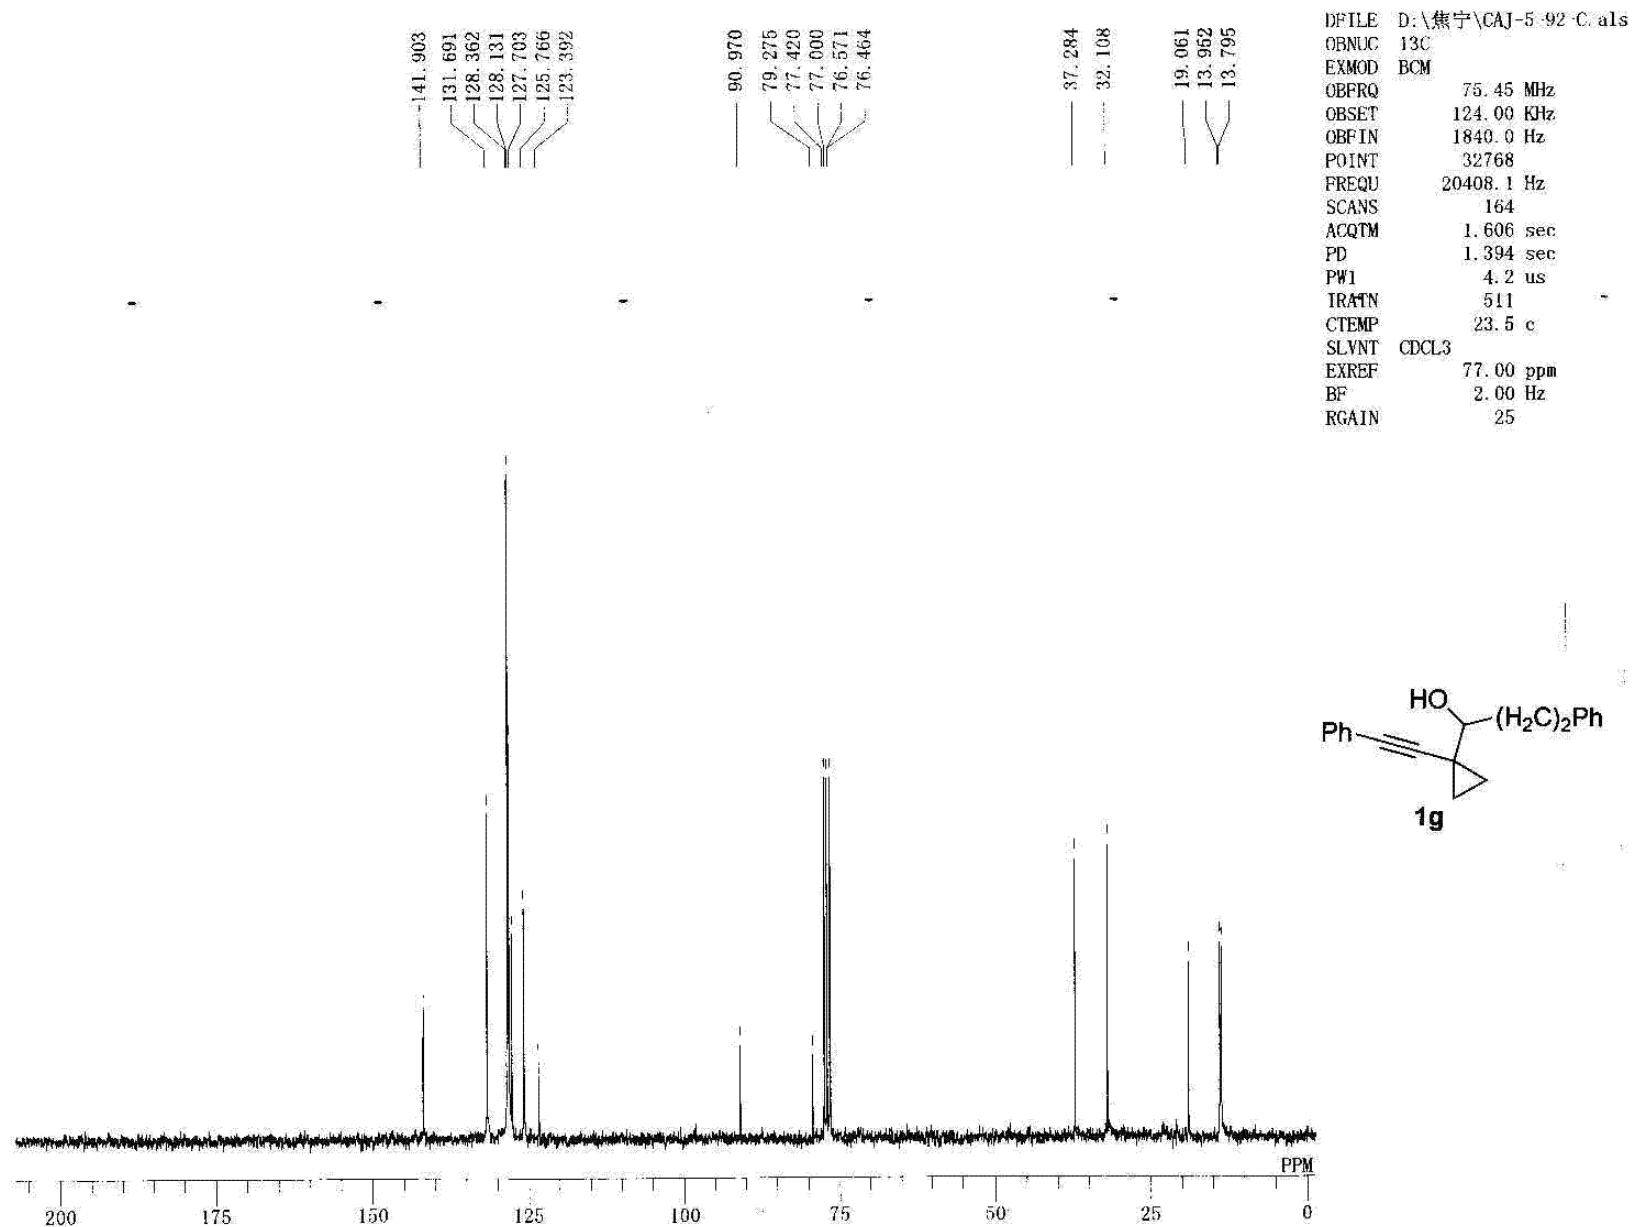

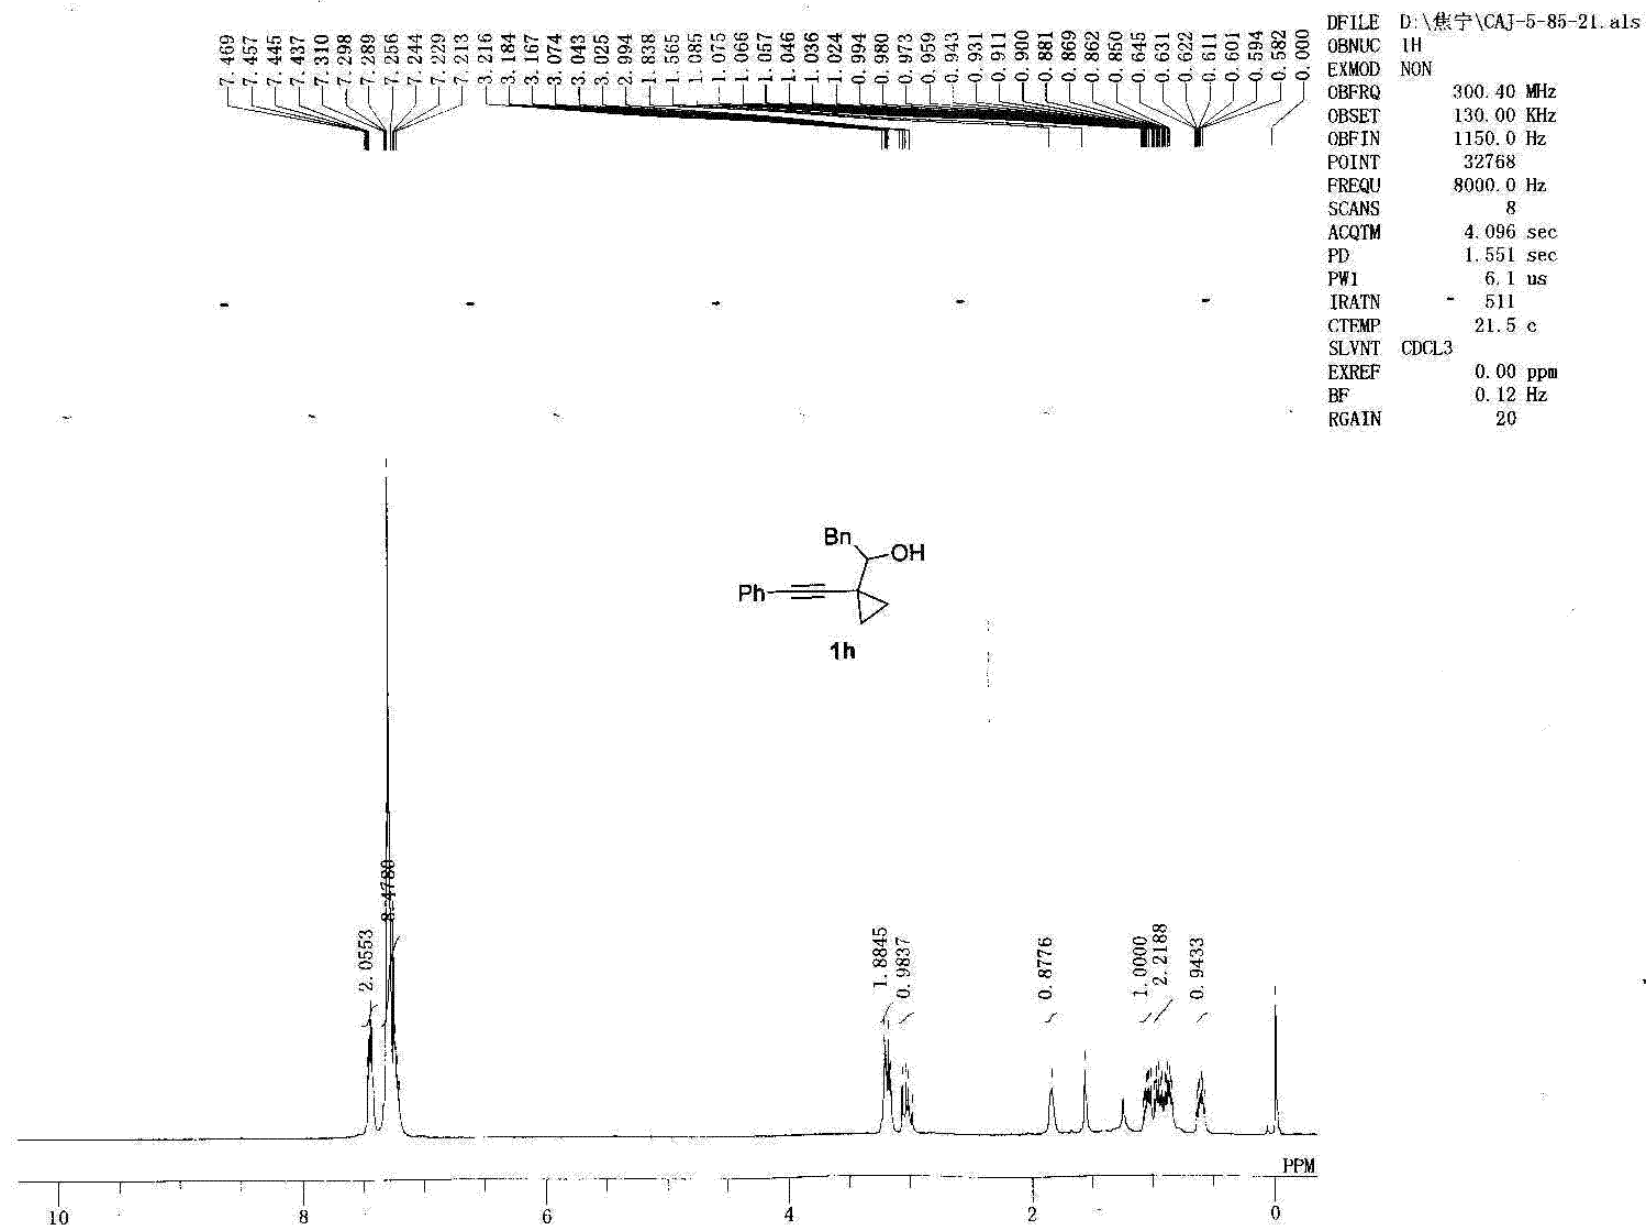

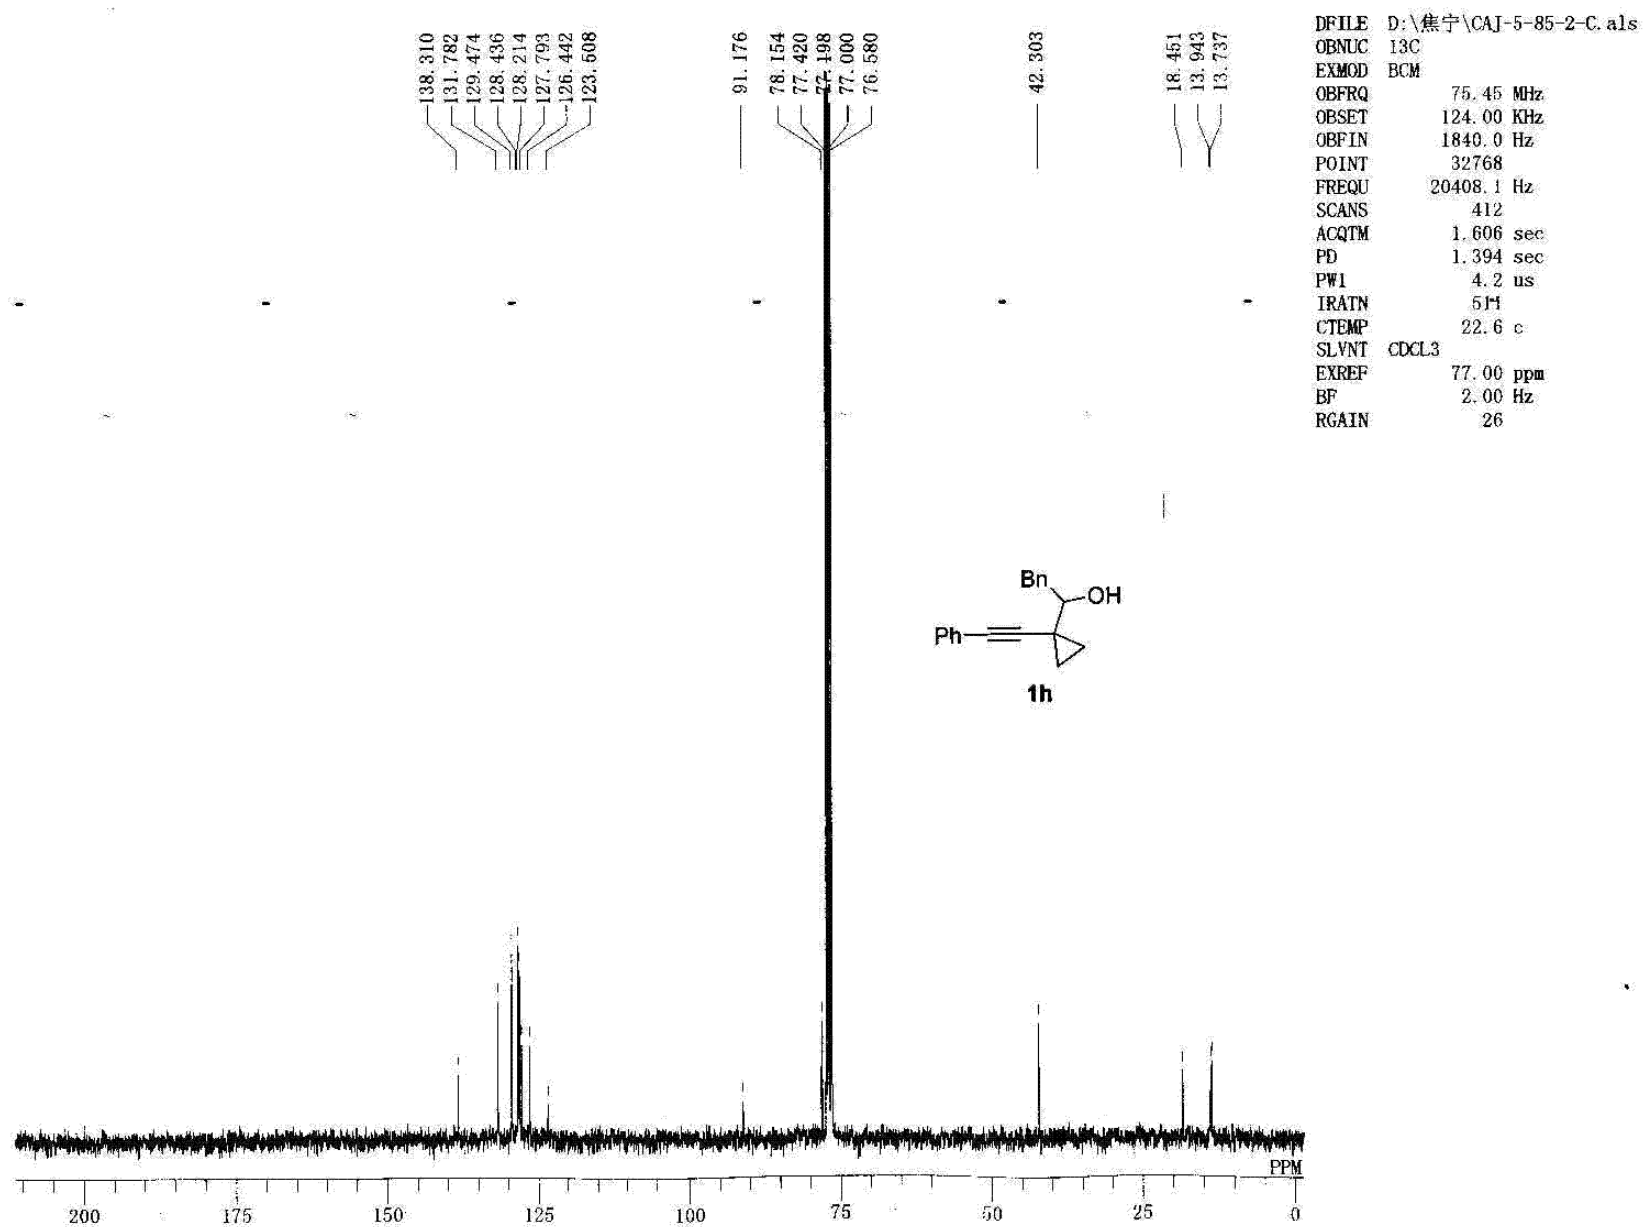



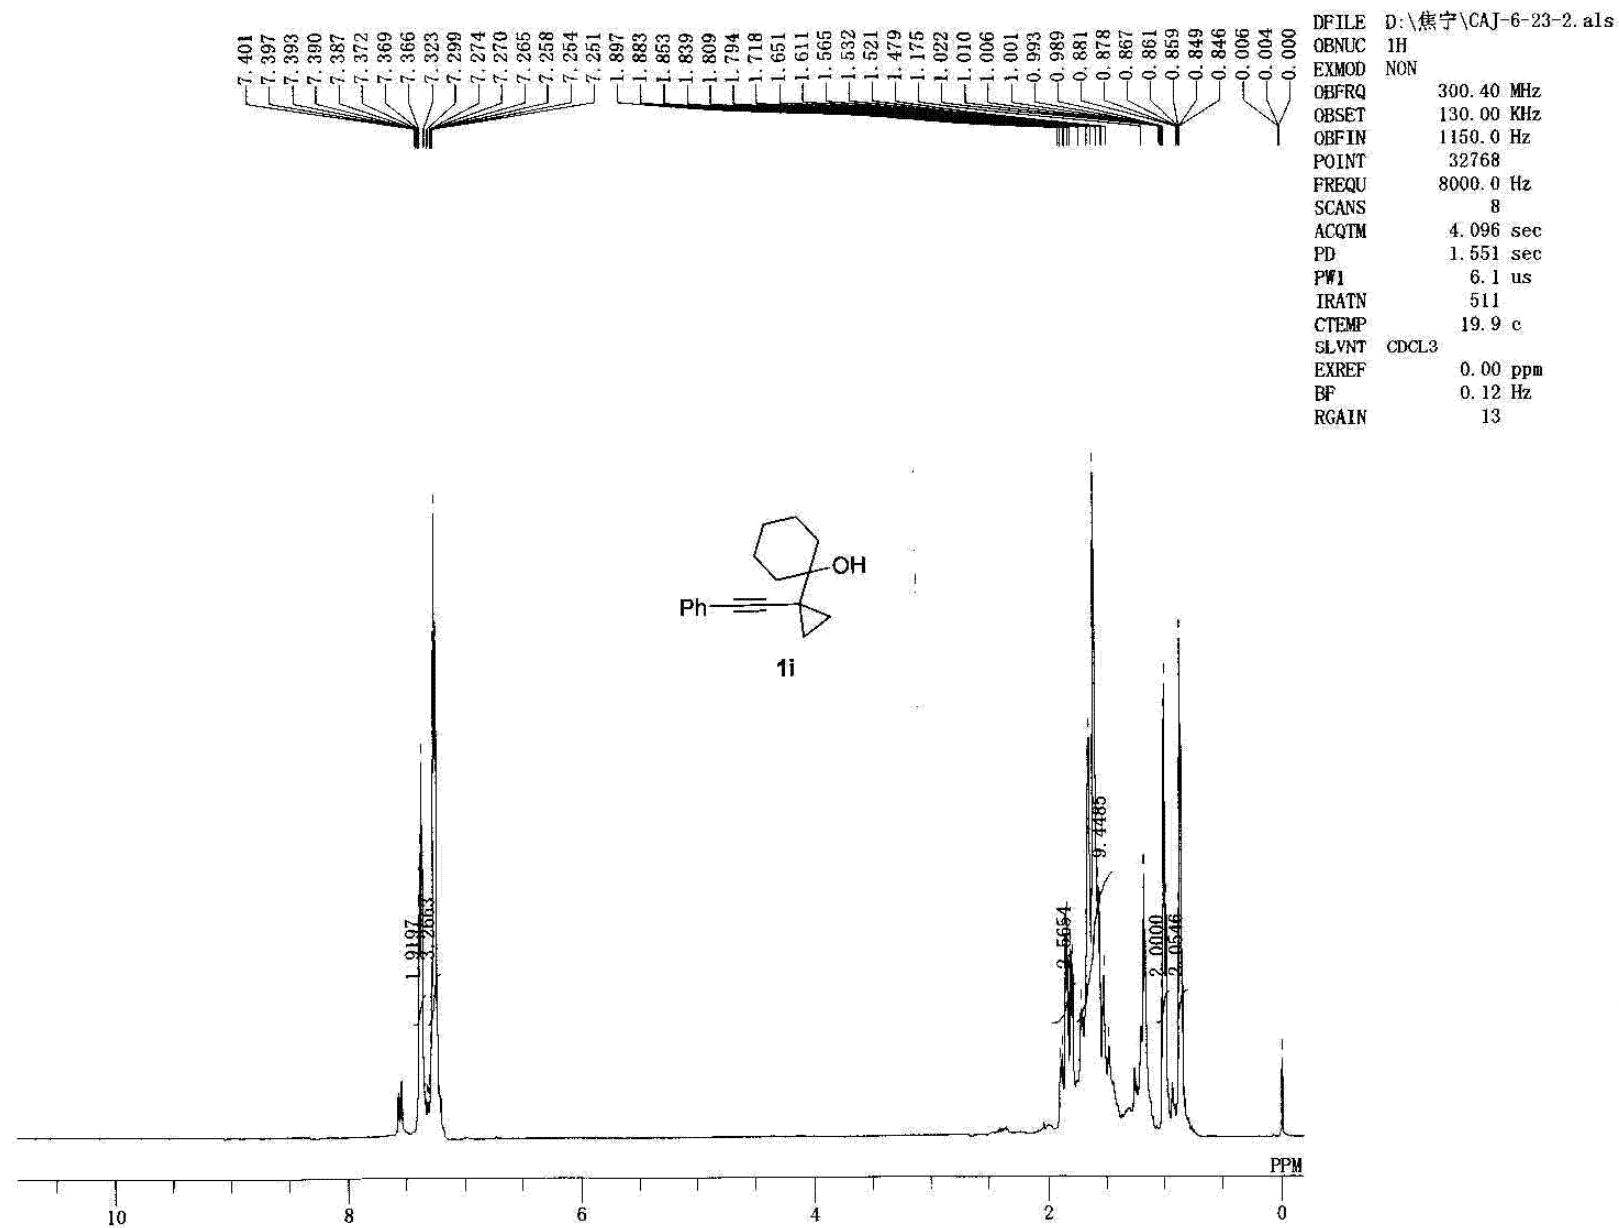

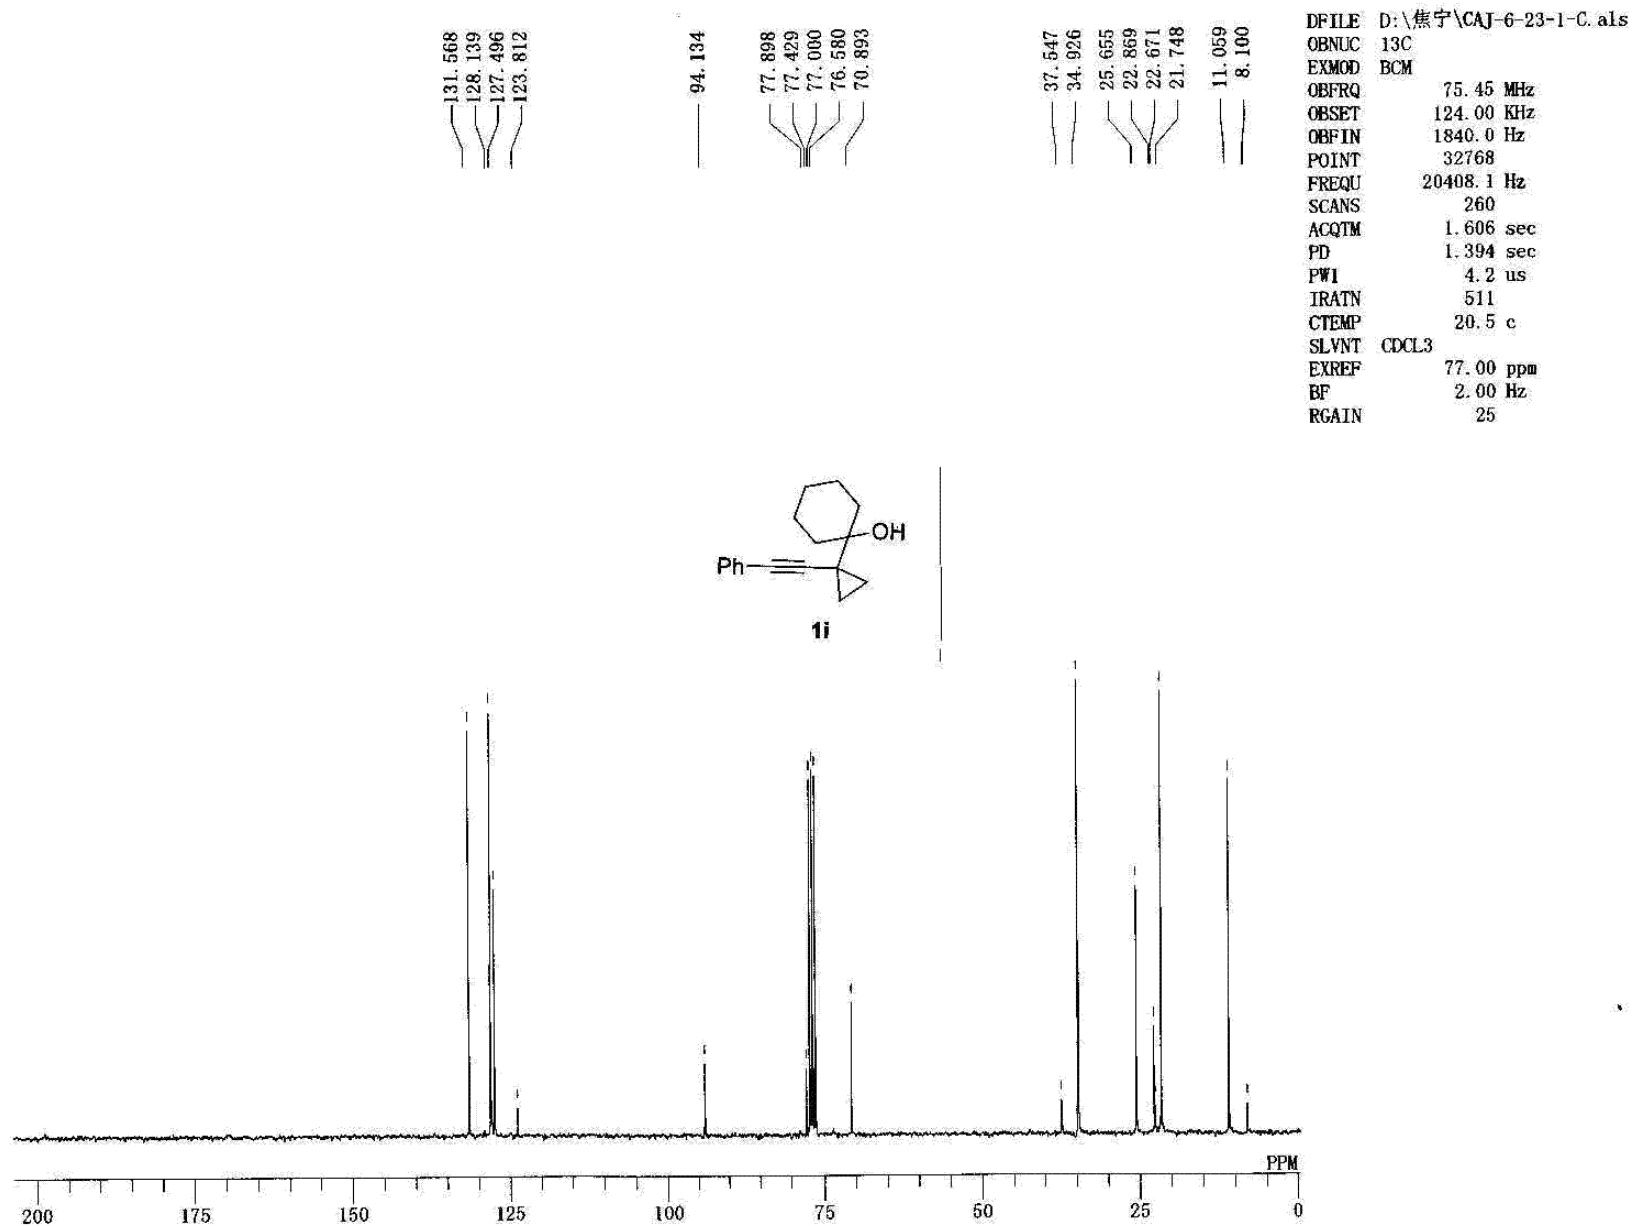

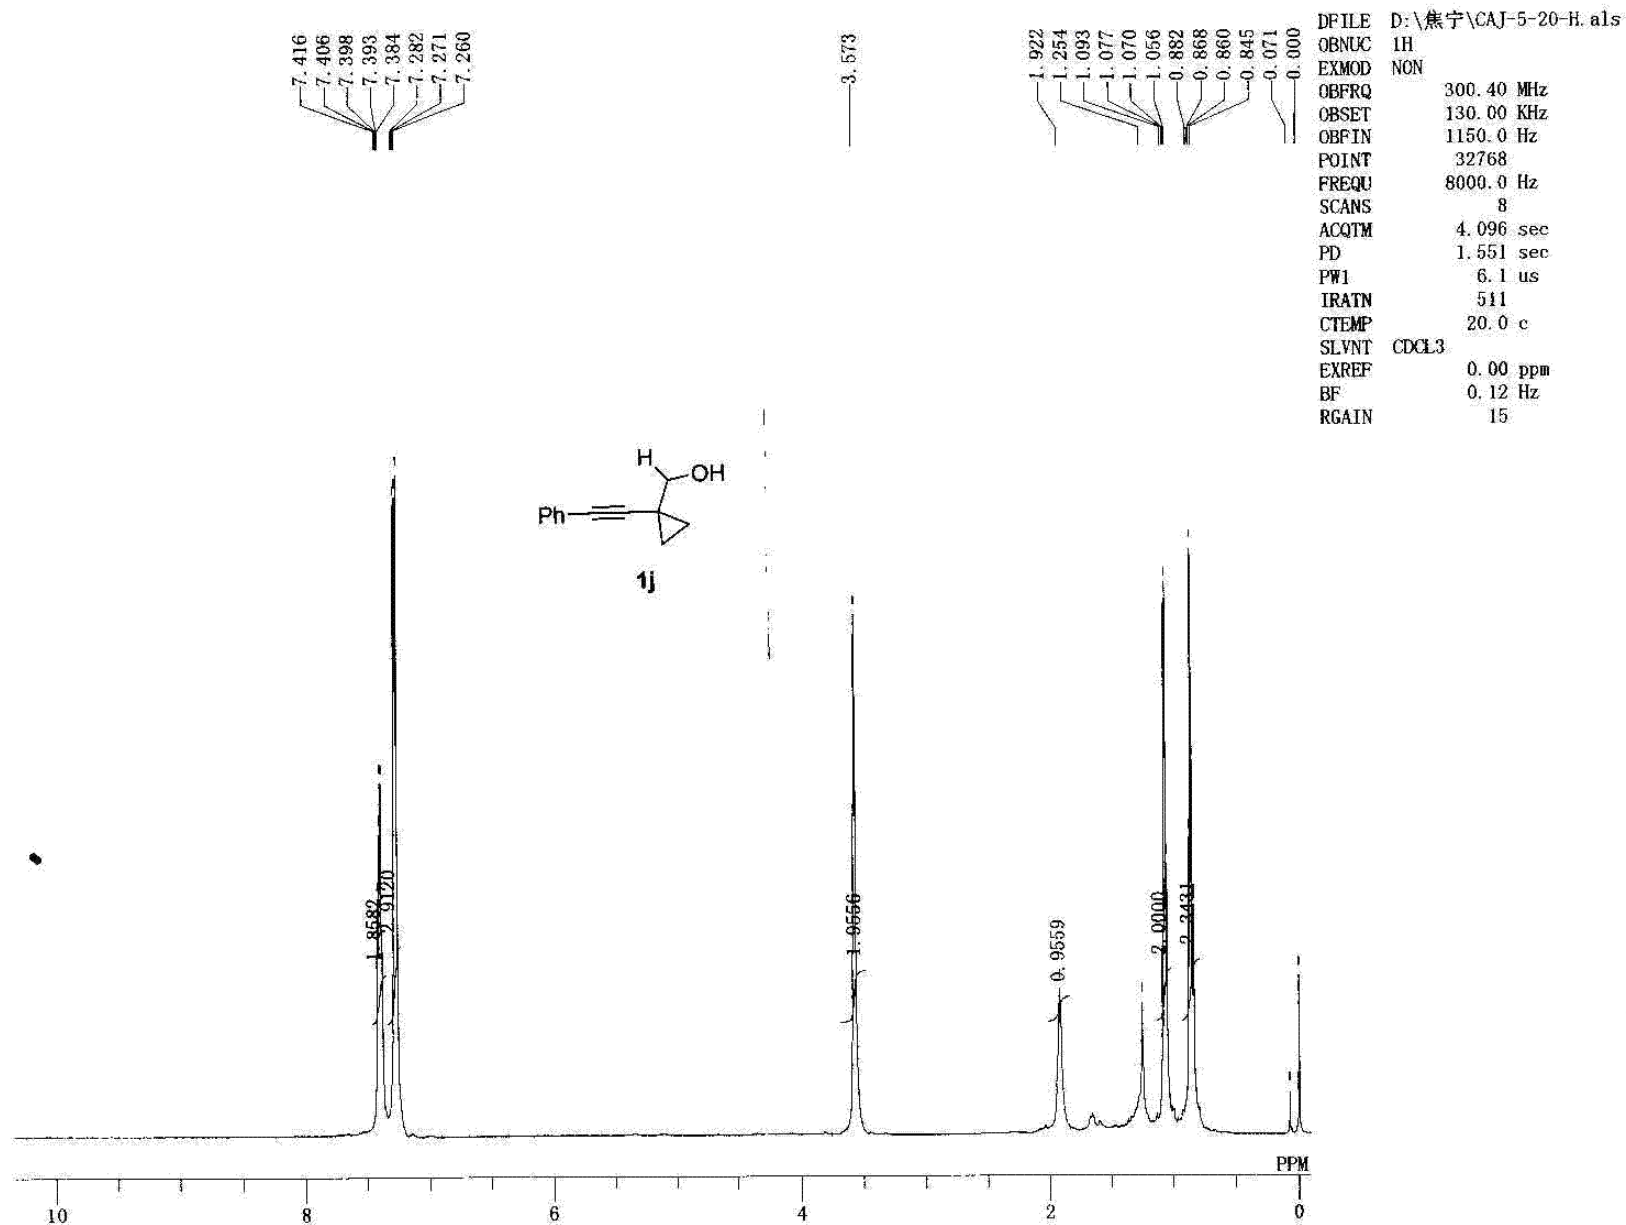

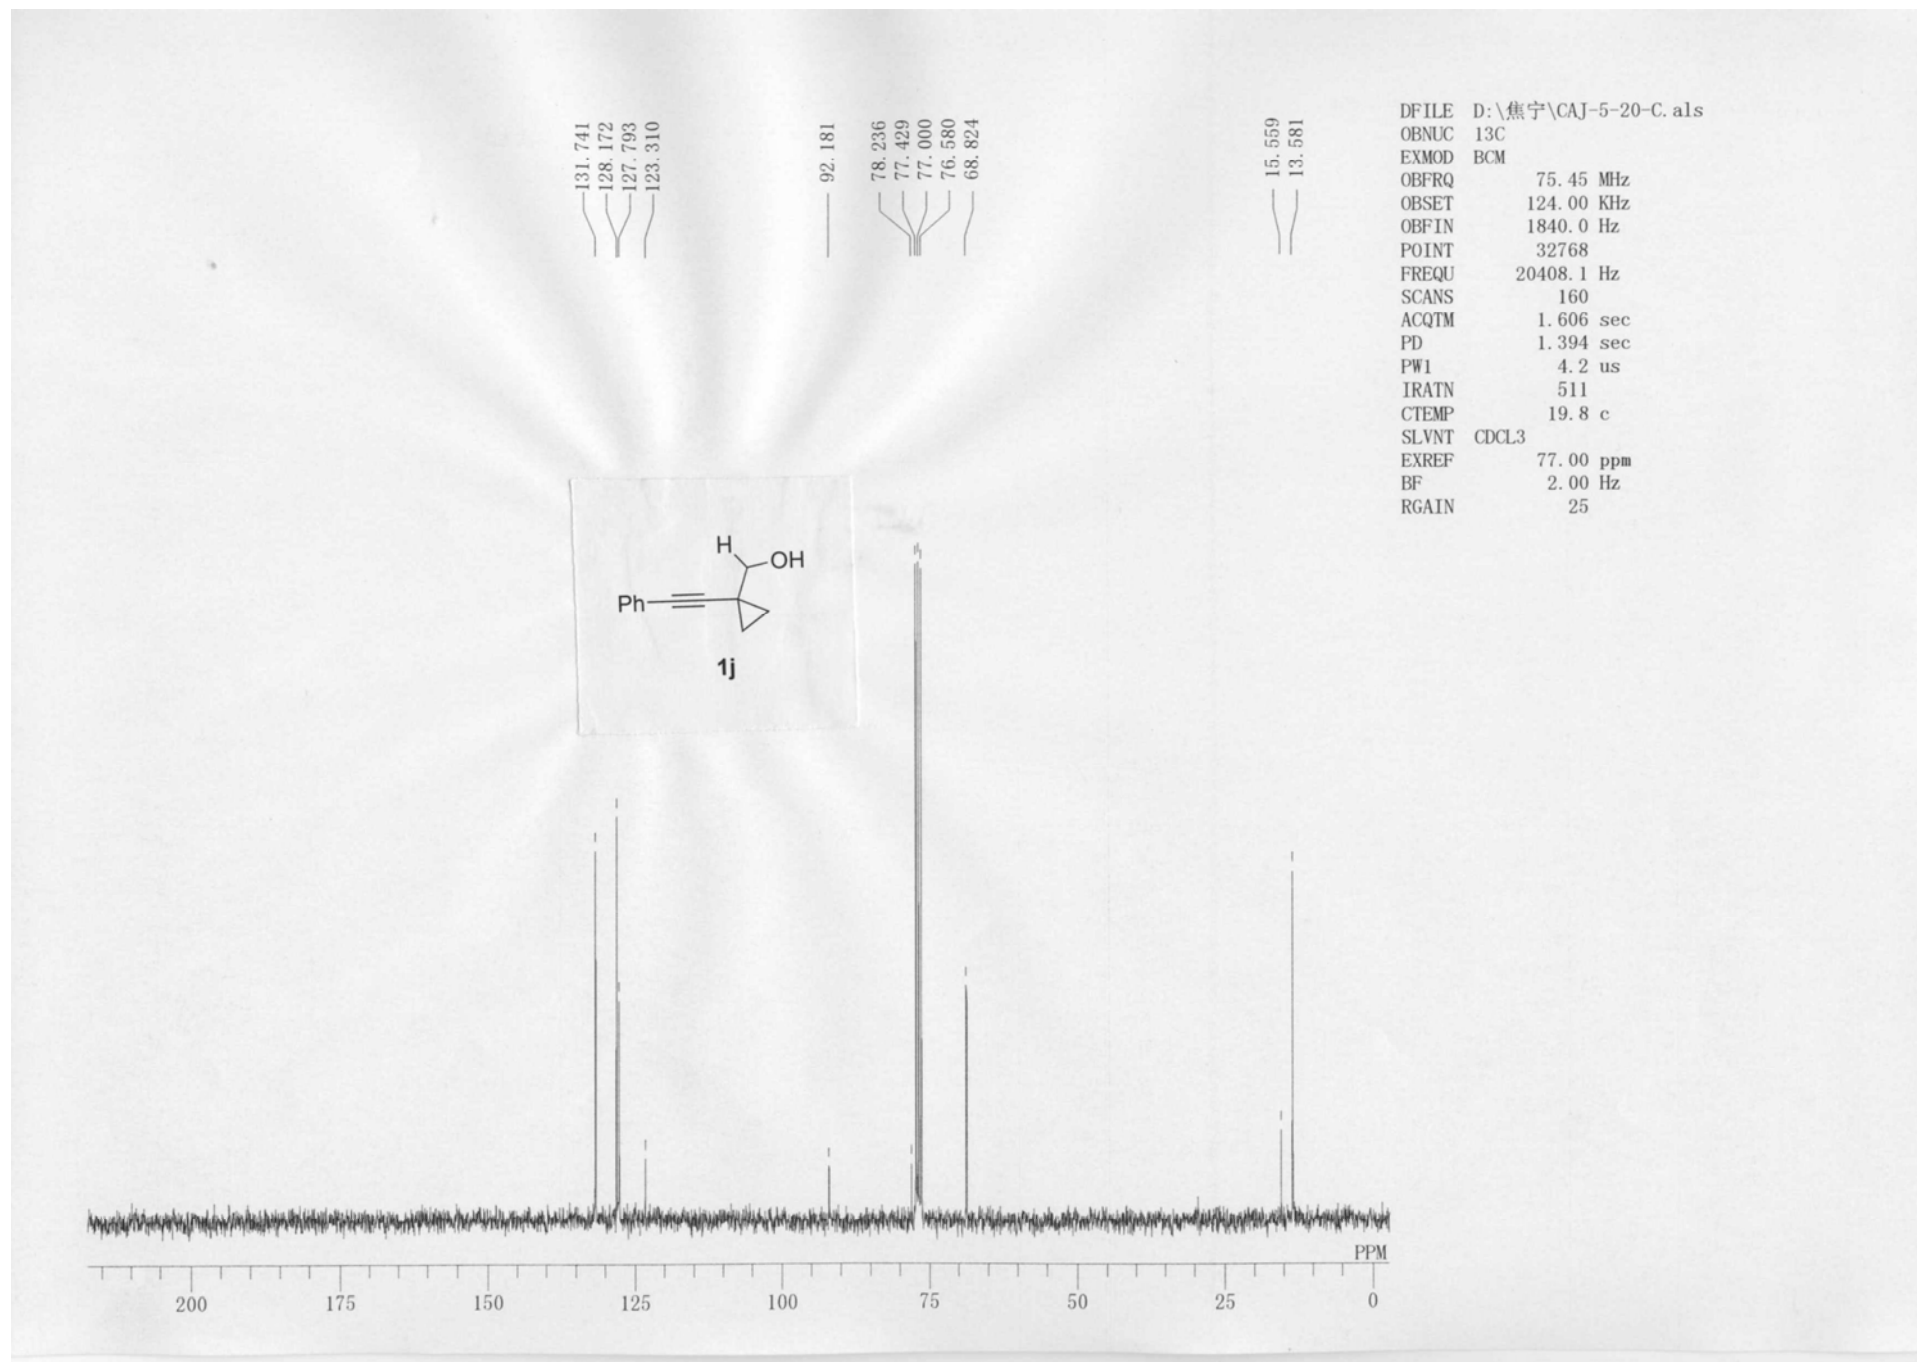

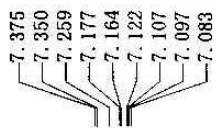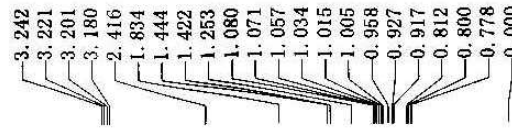

D:\焦宁\CAJ-5-124.als  
1H  
NON  
300.40 MHz  
130.00 KHz  
1150.0 Hz  
32768  
8000.0 Hz  
8  
4.096 sec  
1.551 sec  
6.1 us  
511  
22.9 c  
CDCL3  
0.00 ppm  
0.12 Hz  
15

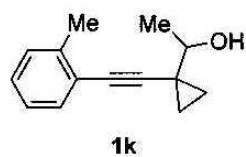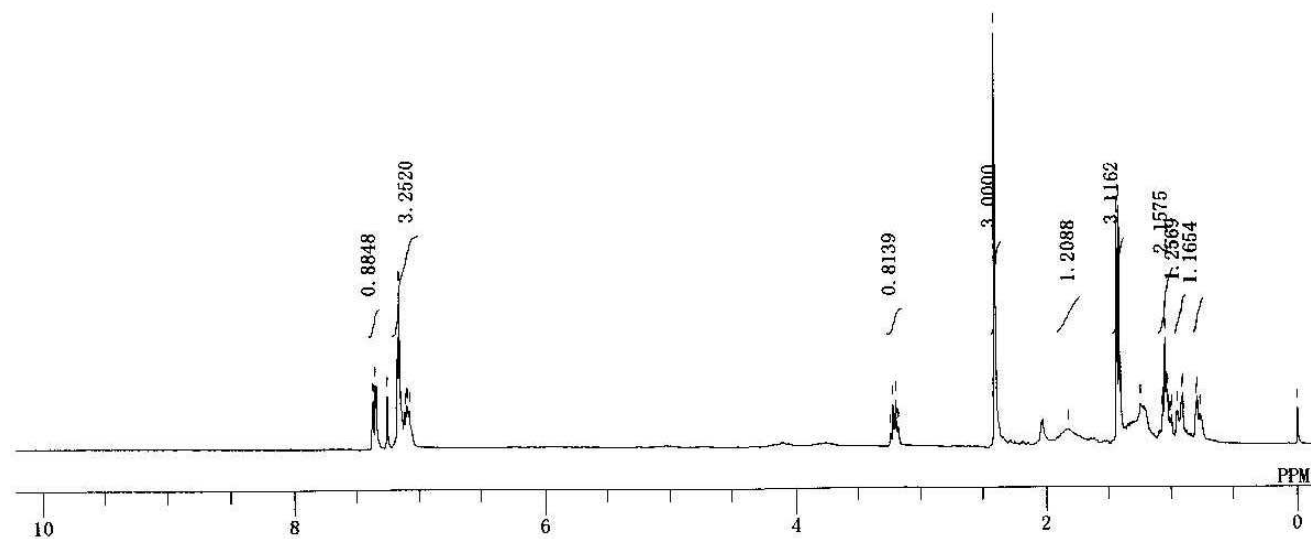

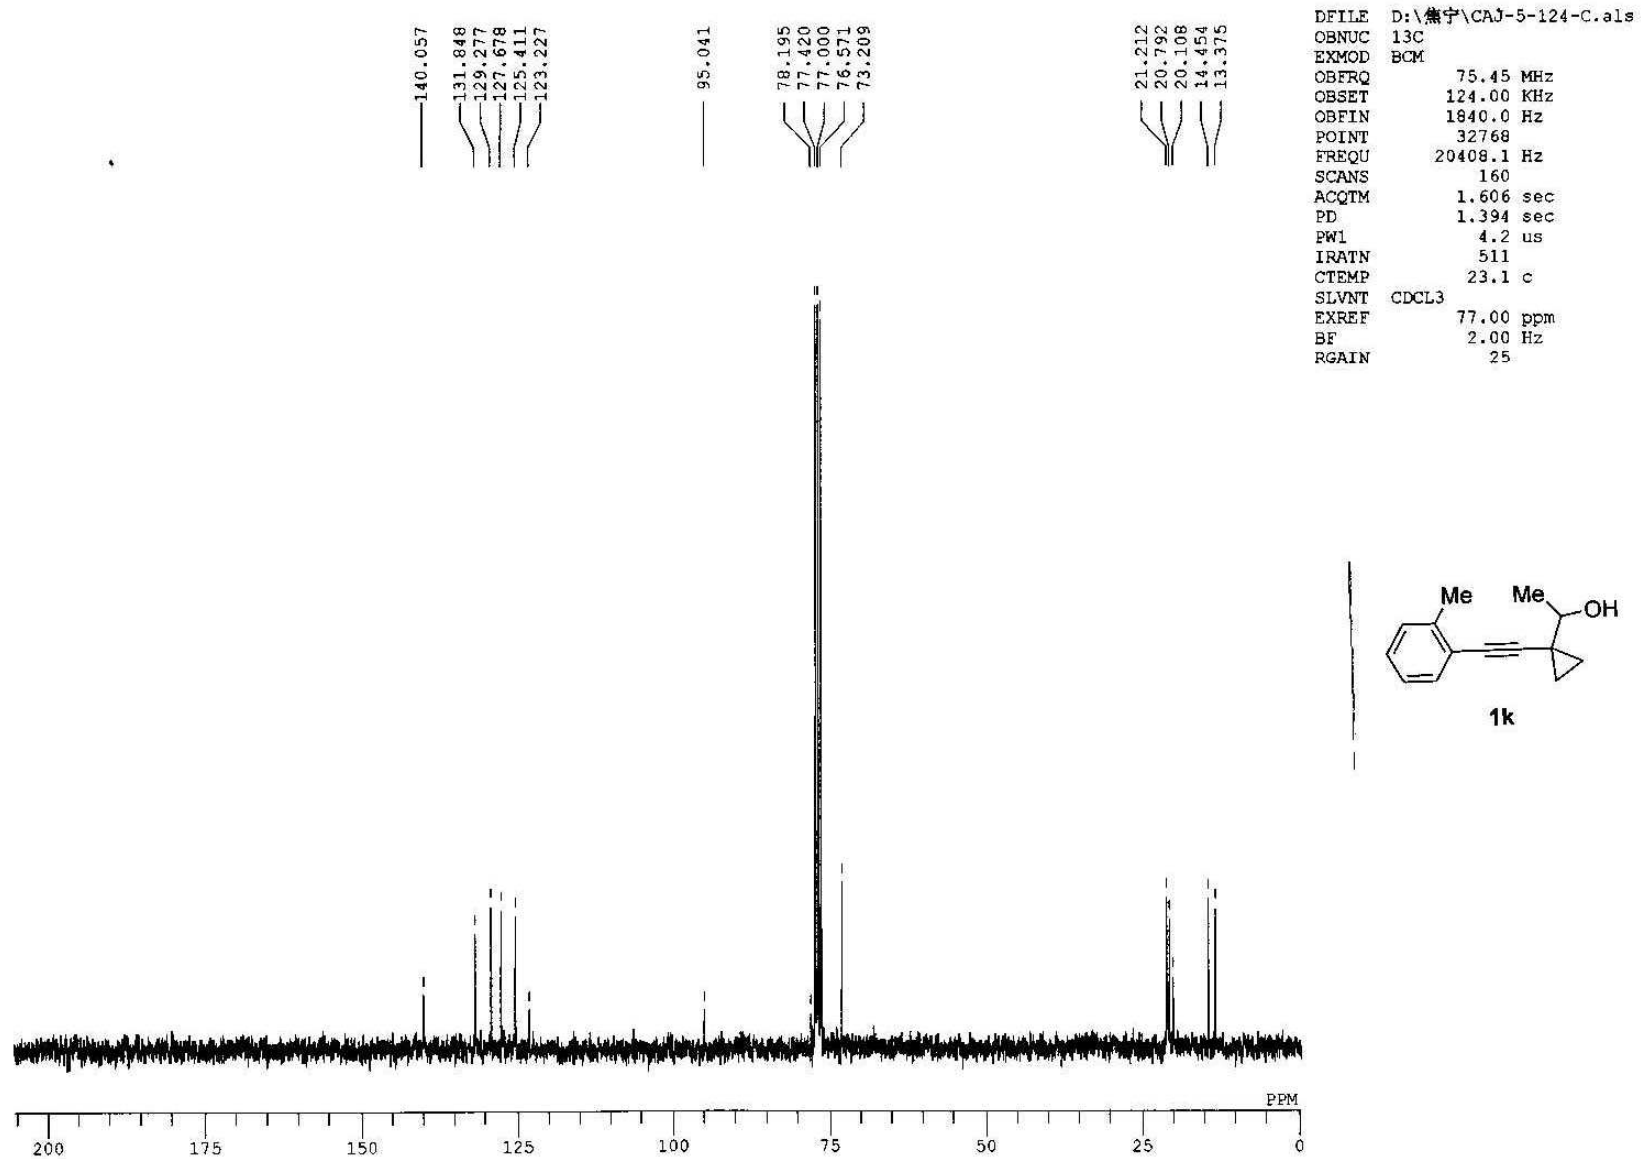

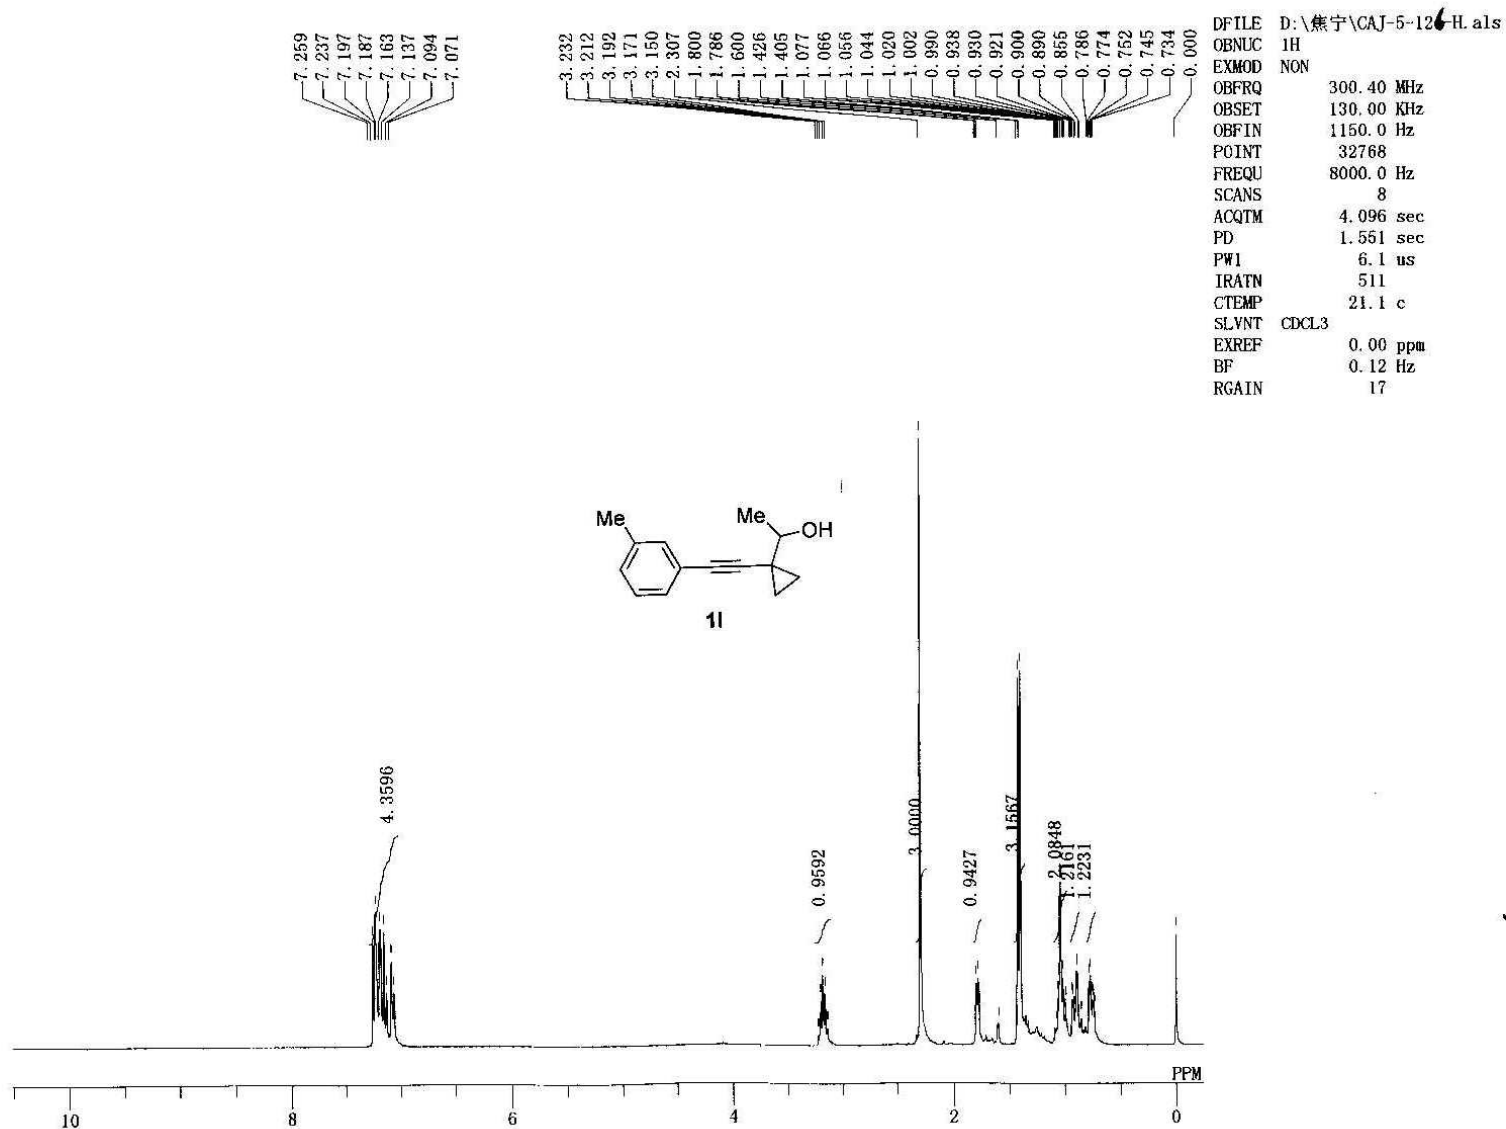

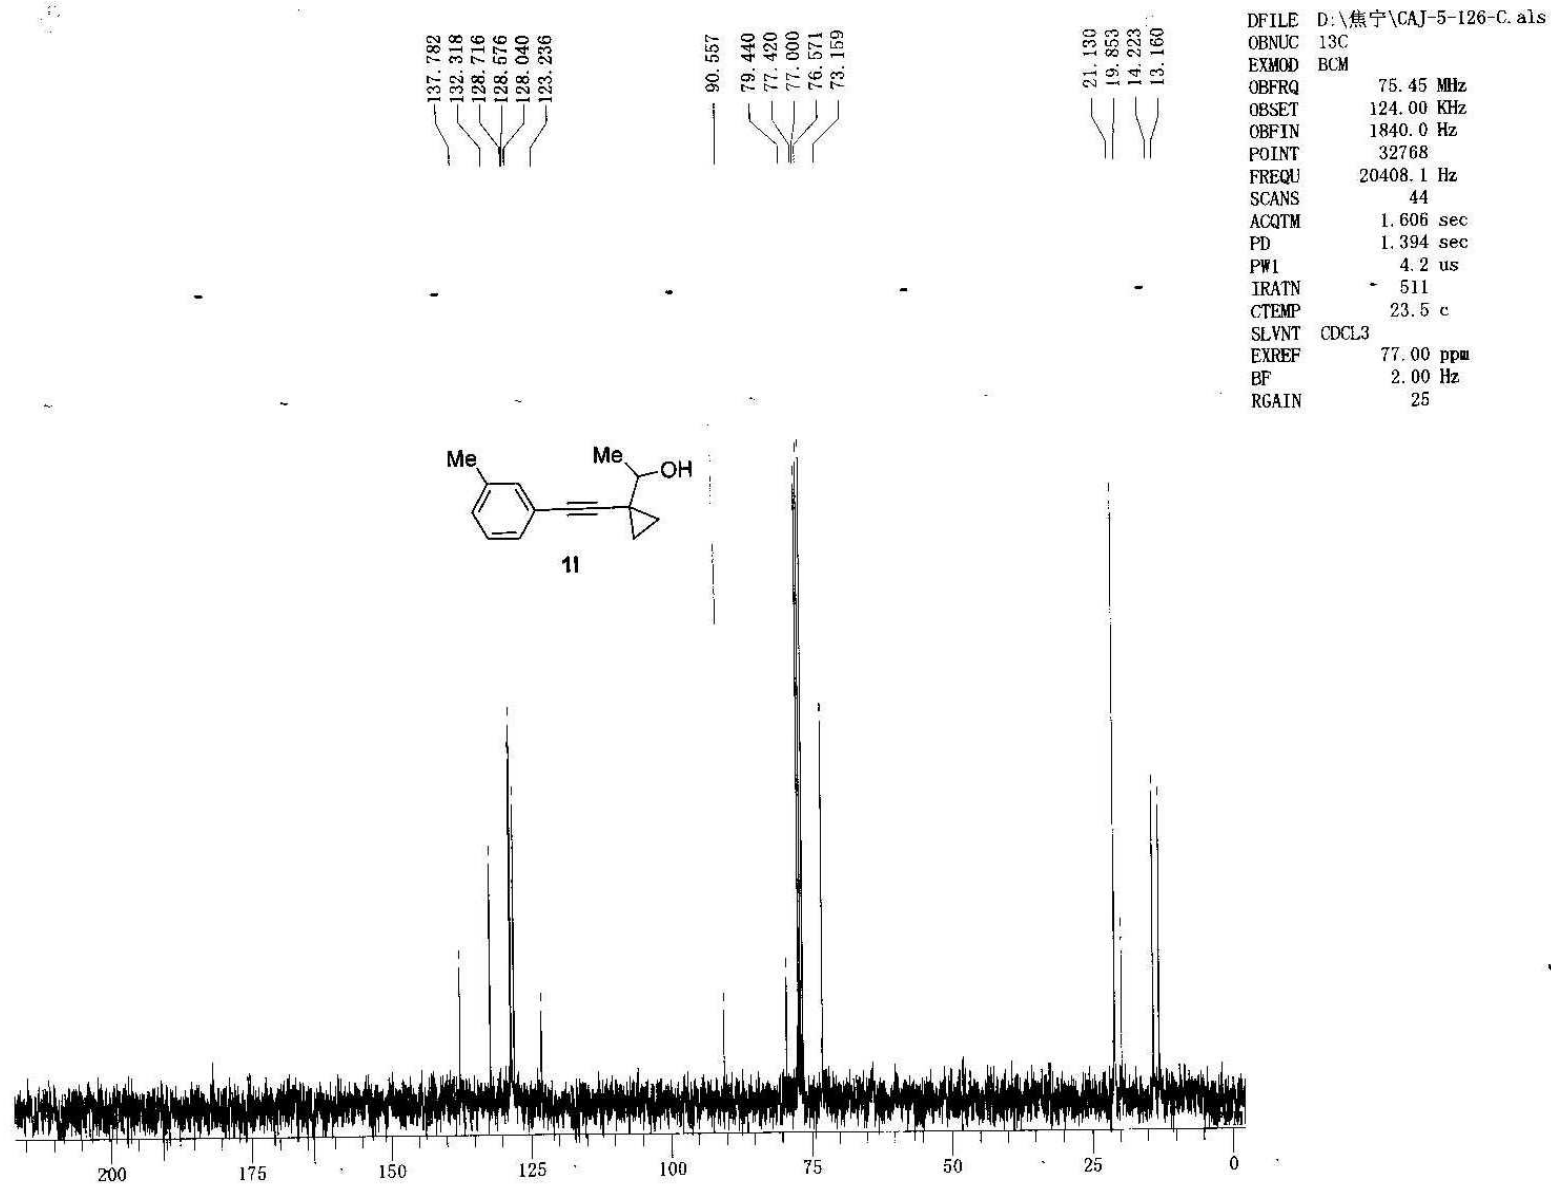



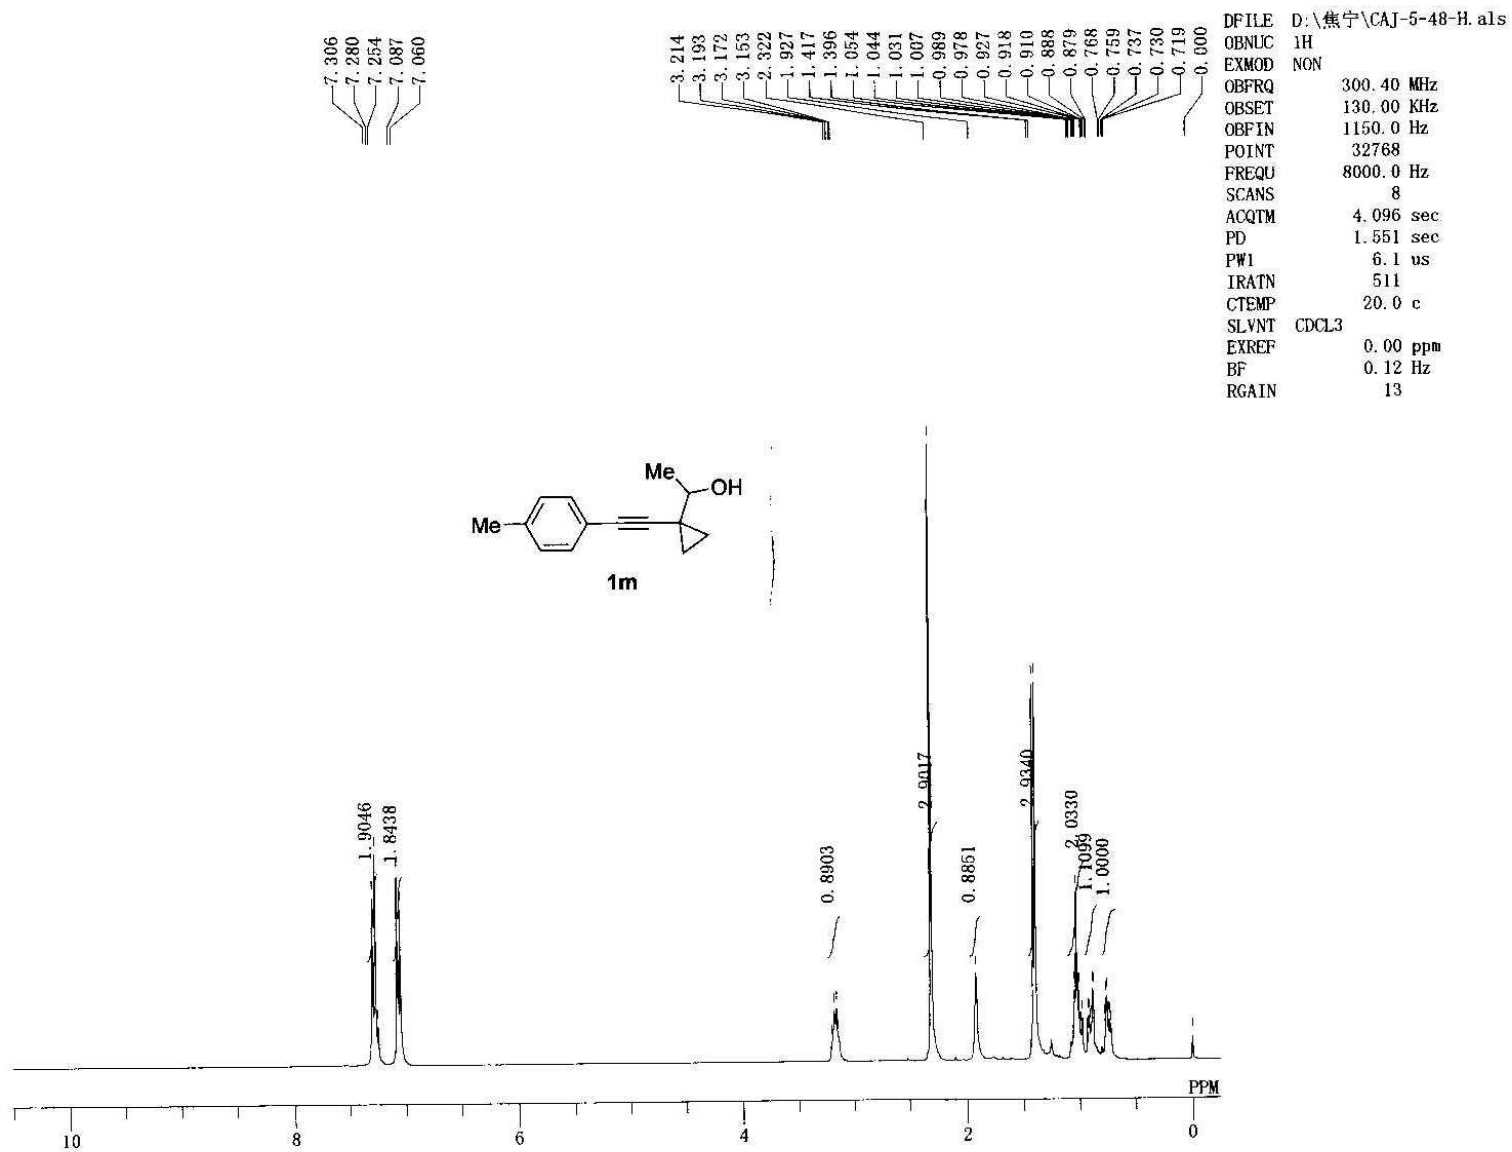

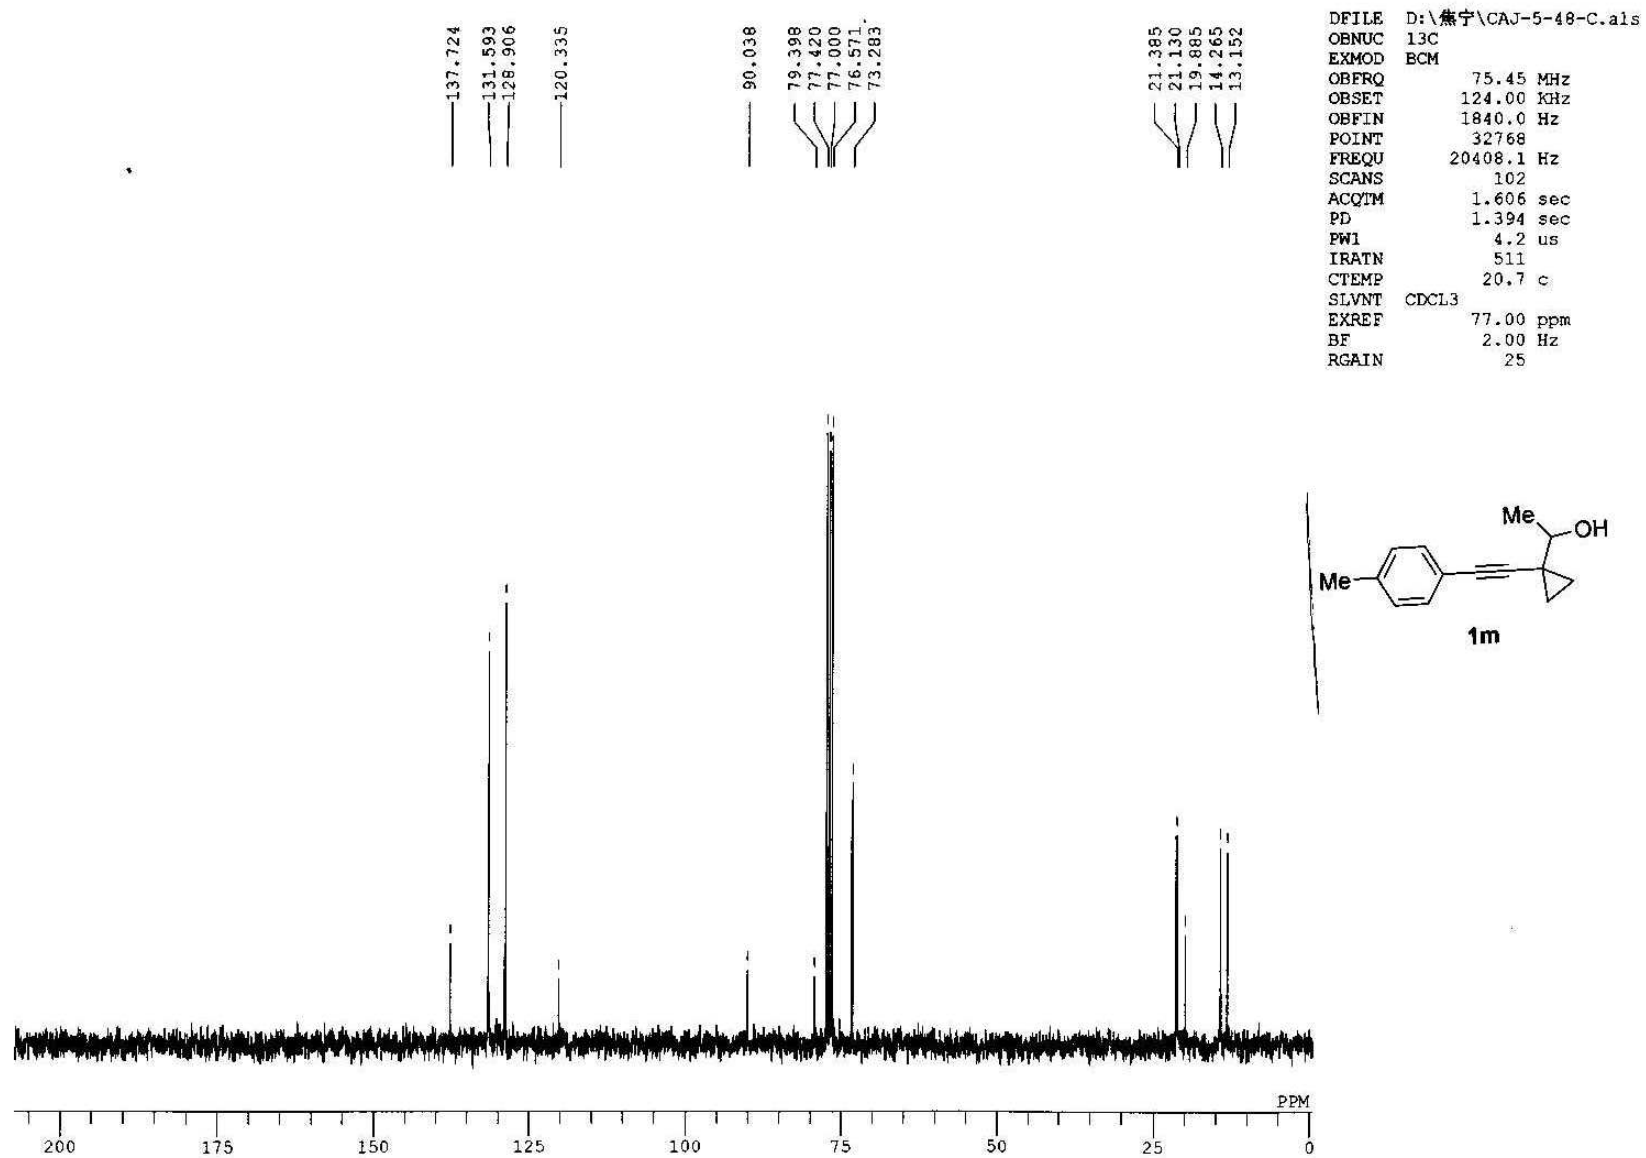

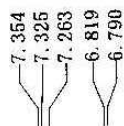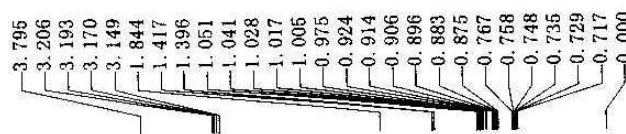

D:\焦宁\CAJ-5-108. als  
D:\焦宁\CAJ-5-108. als  
OBNUC 1H  
EXMOD NON  
OBFRQ 300.40 MHz  
OBSET 130.00 KHz  
OBFIN 1150.0 Hz  
POINT 32768  
FREQU 8000.0 Hz  
SCANS 8  
ACQTM 4.096 sec  
PD 1.551 sec  
PW1 6.1 us  
IRATN 511  
CTEMP 20.8 c  
SLVNT CDCL3  
EXREF 0.00 ppm  
BF 0.12 Hz  
RGAIN 15

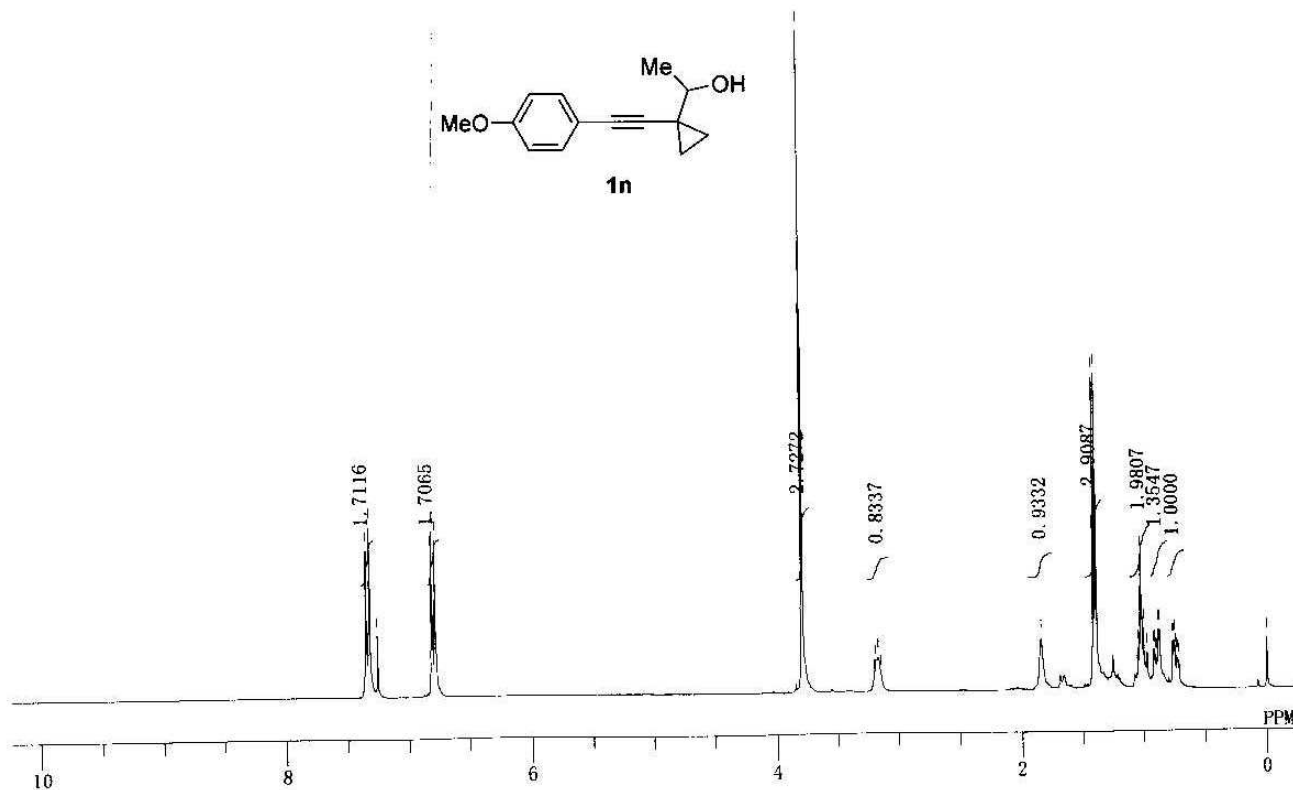

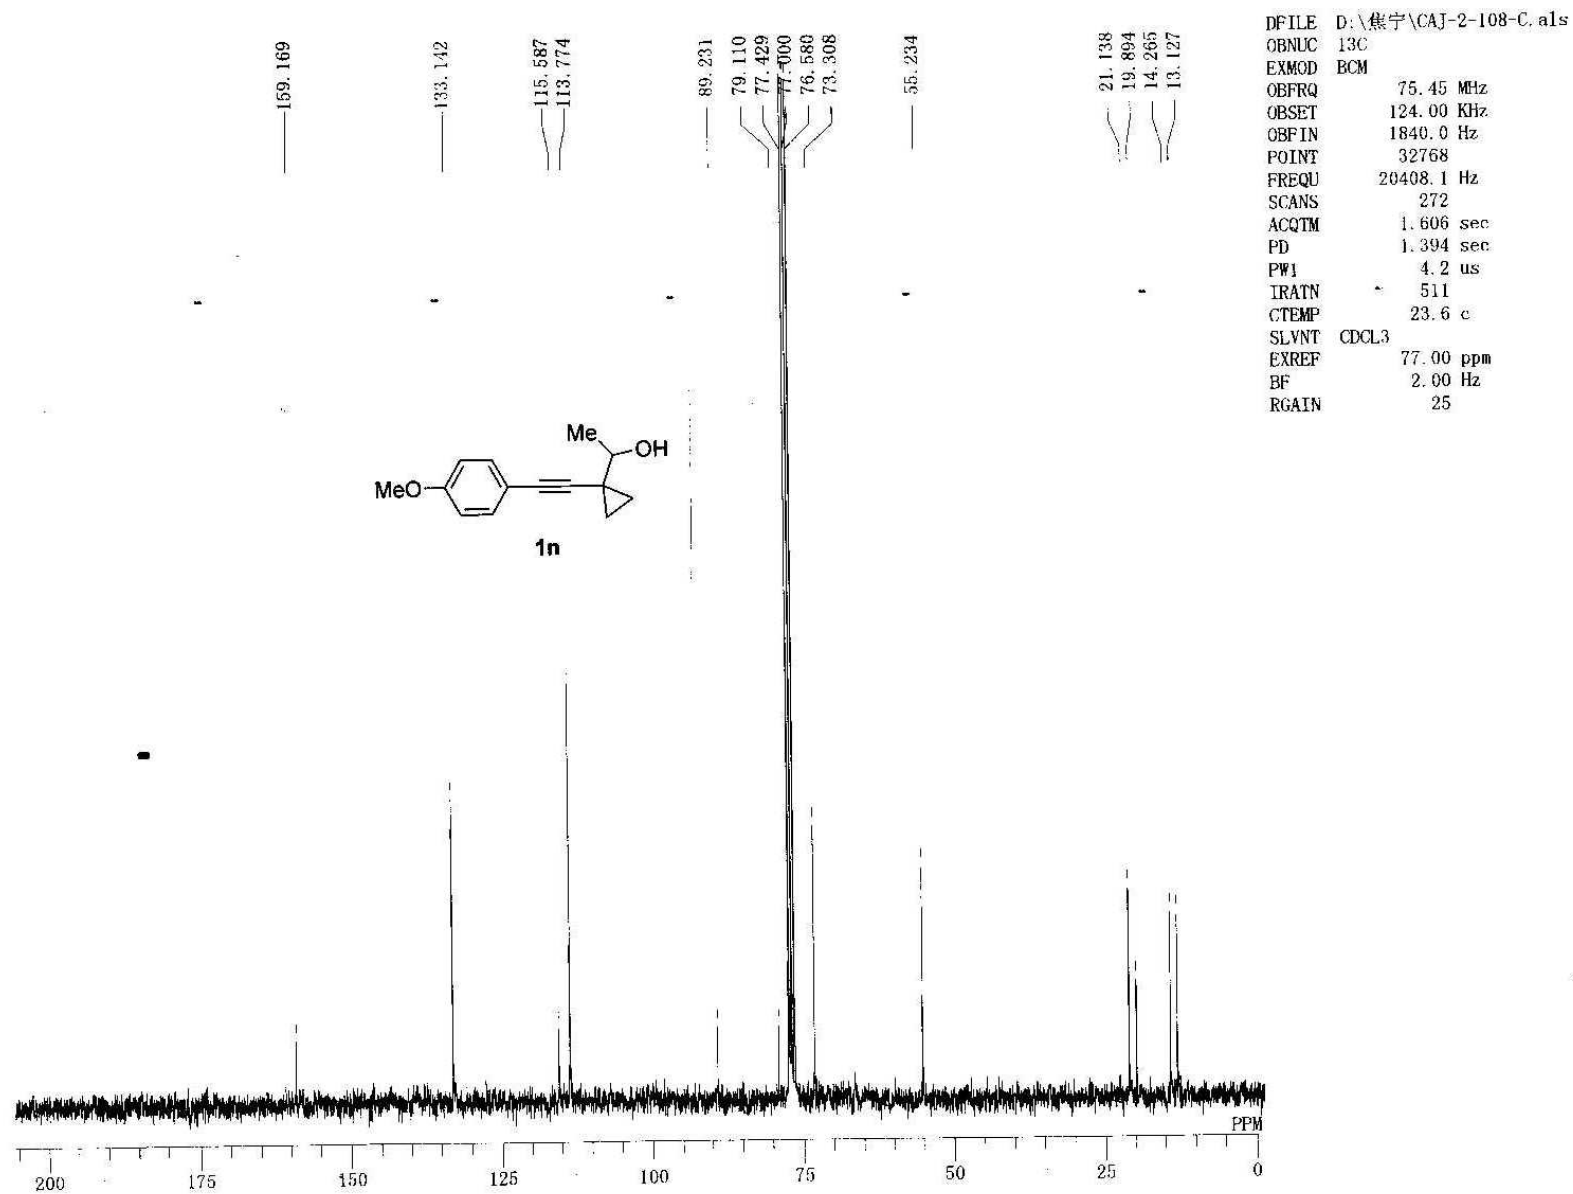

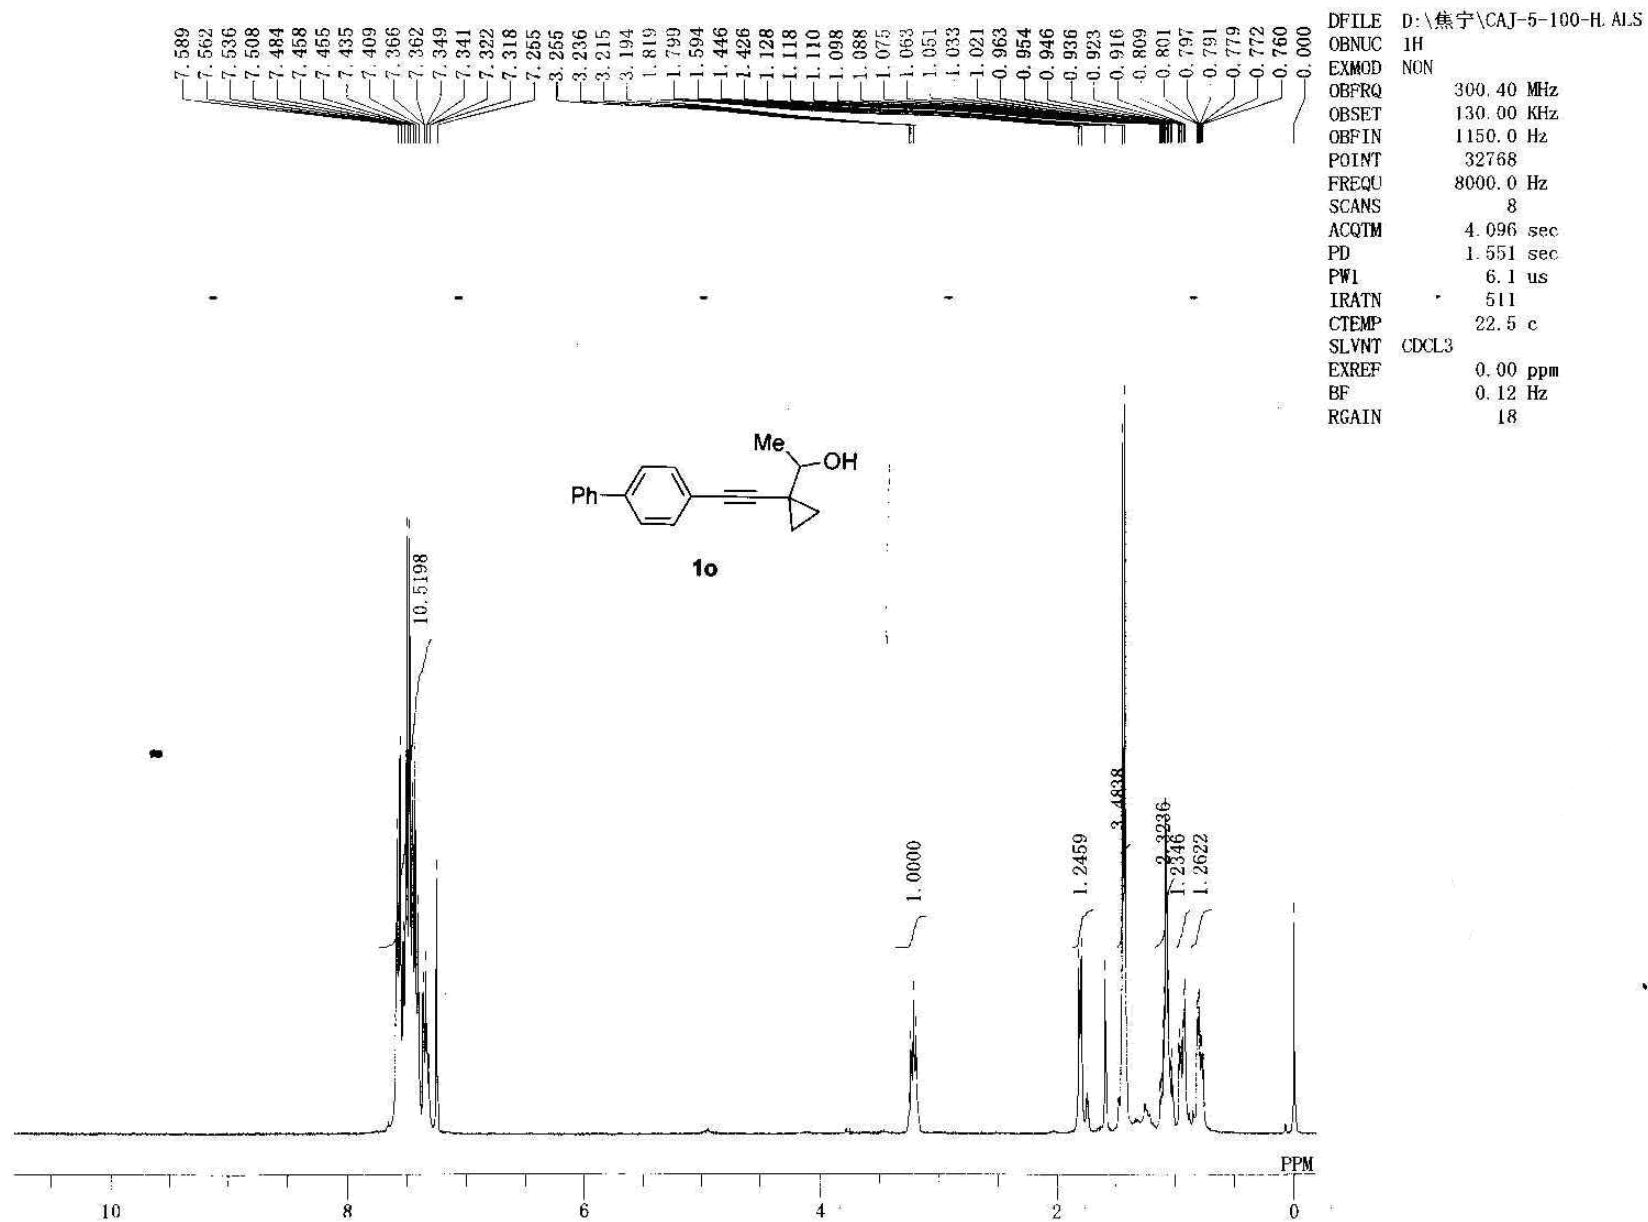

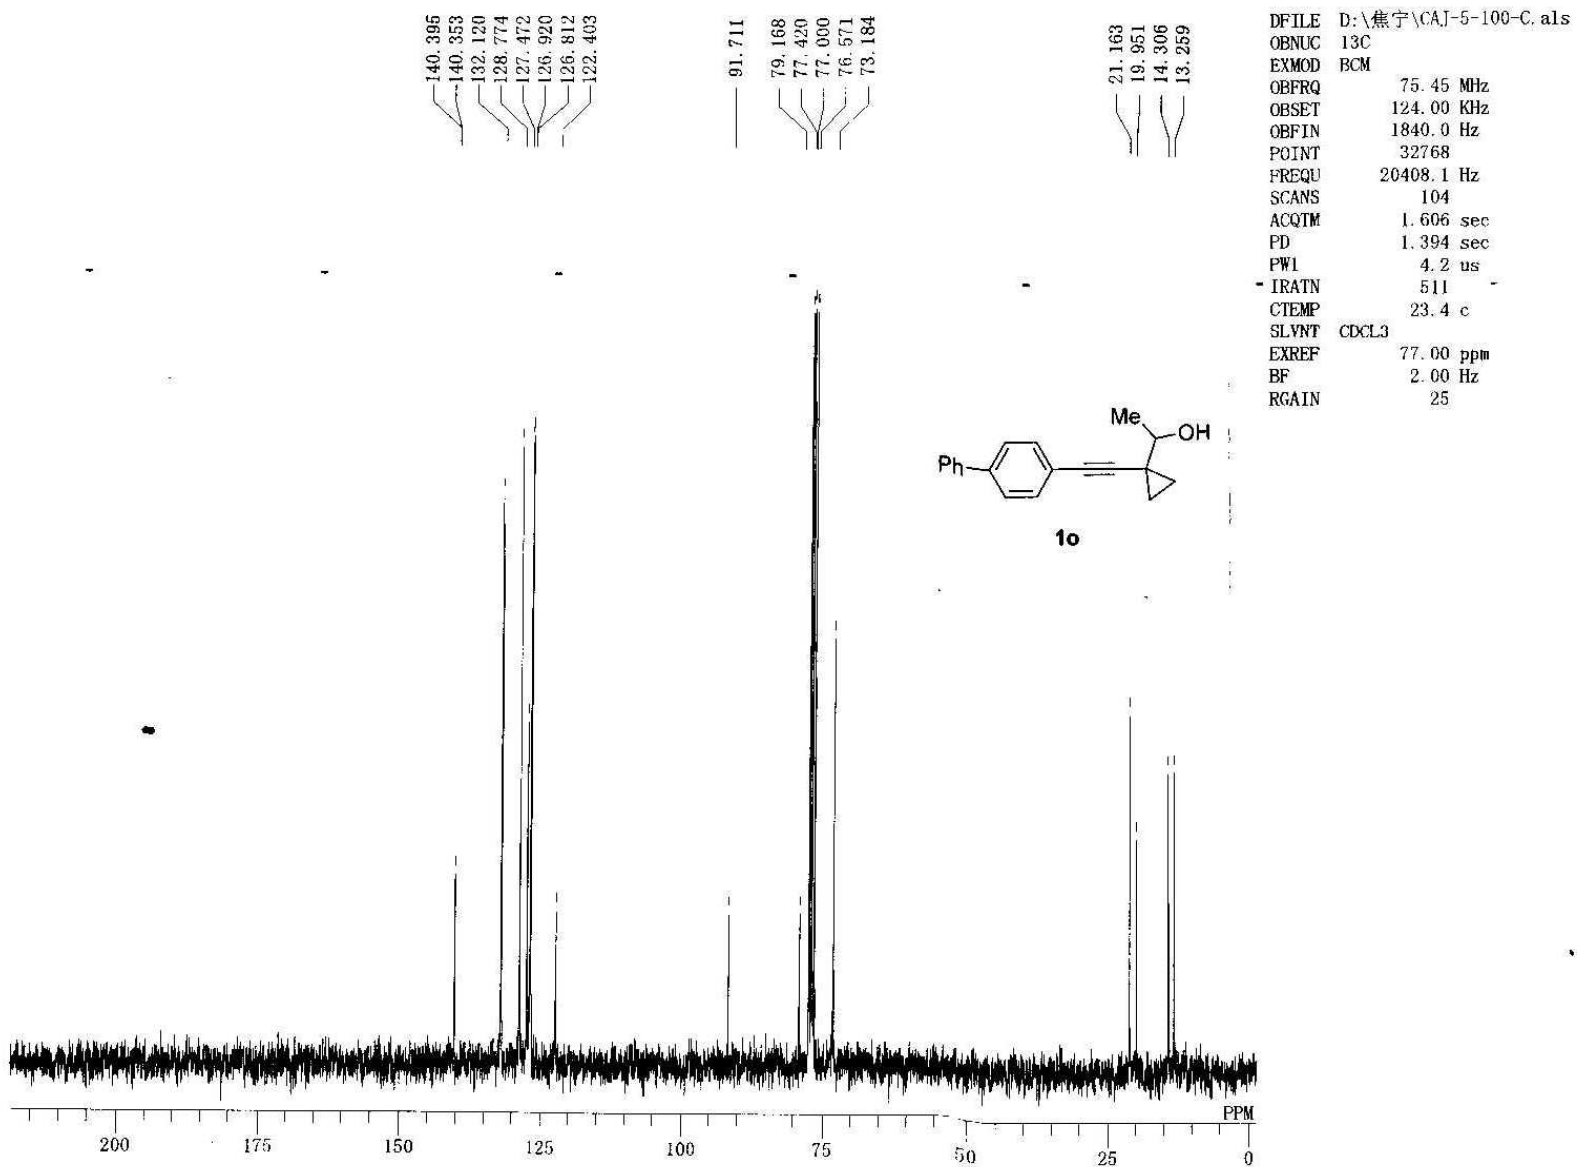

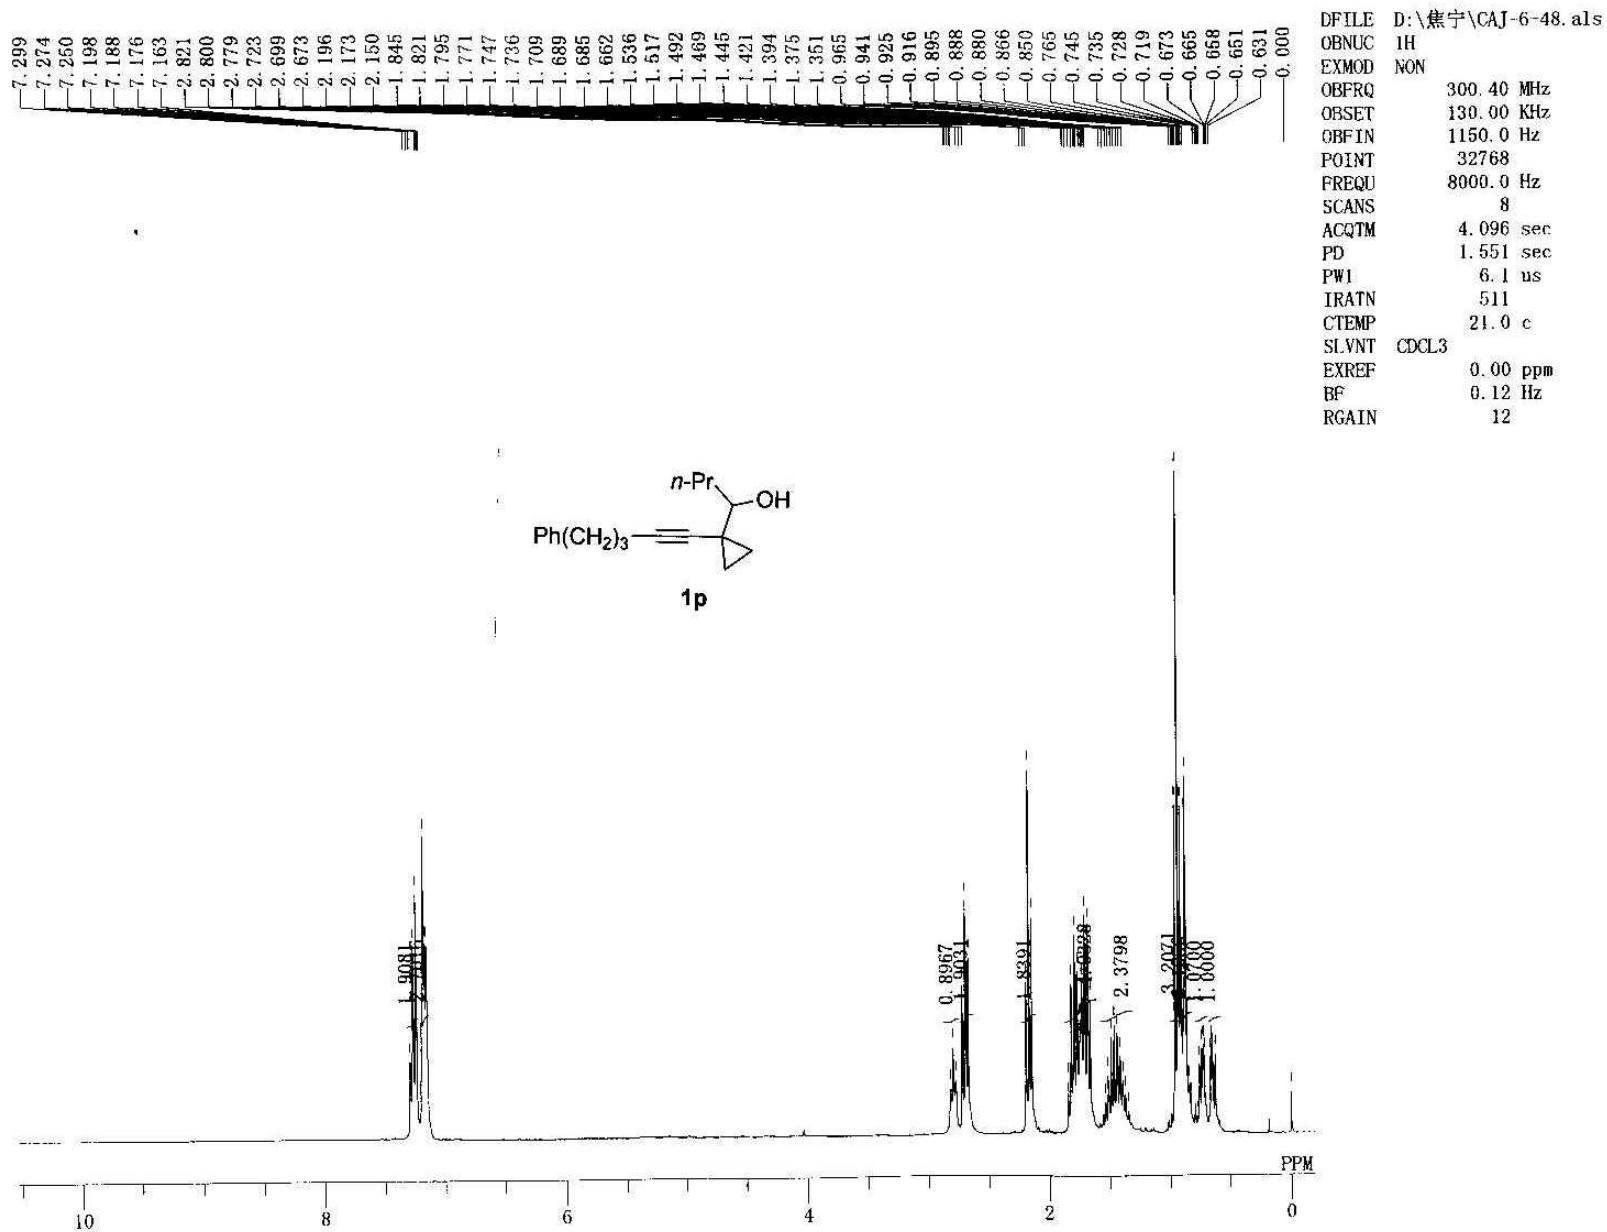

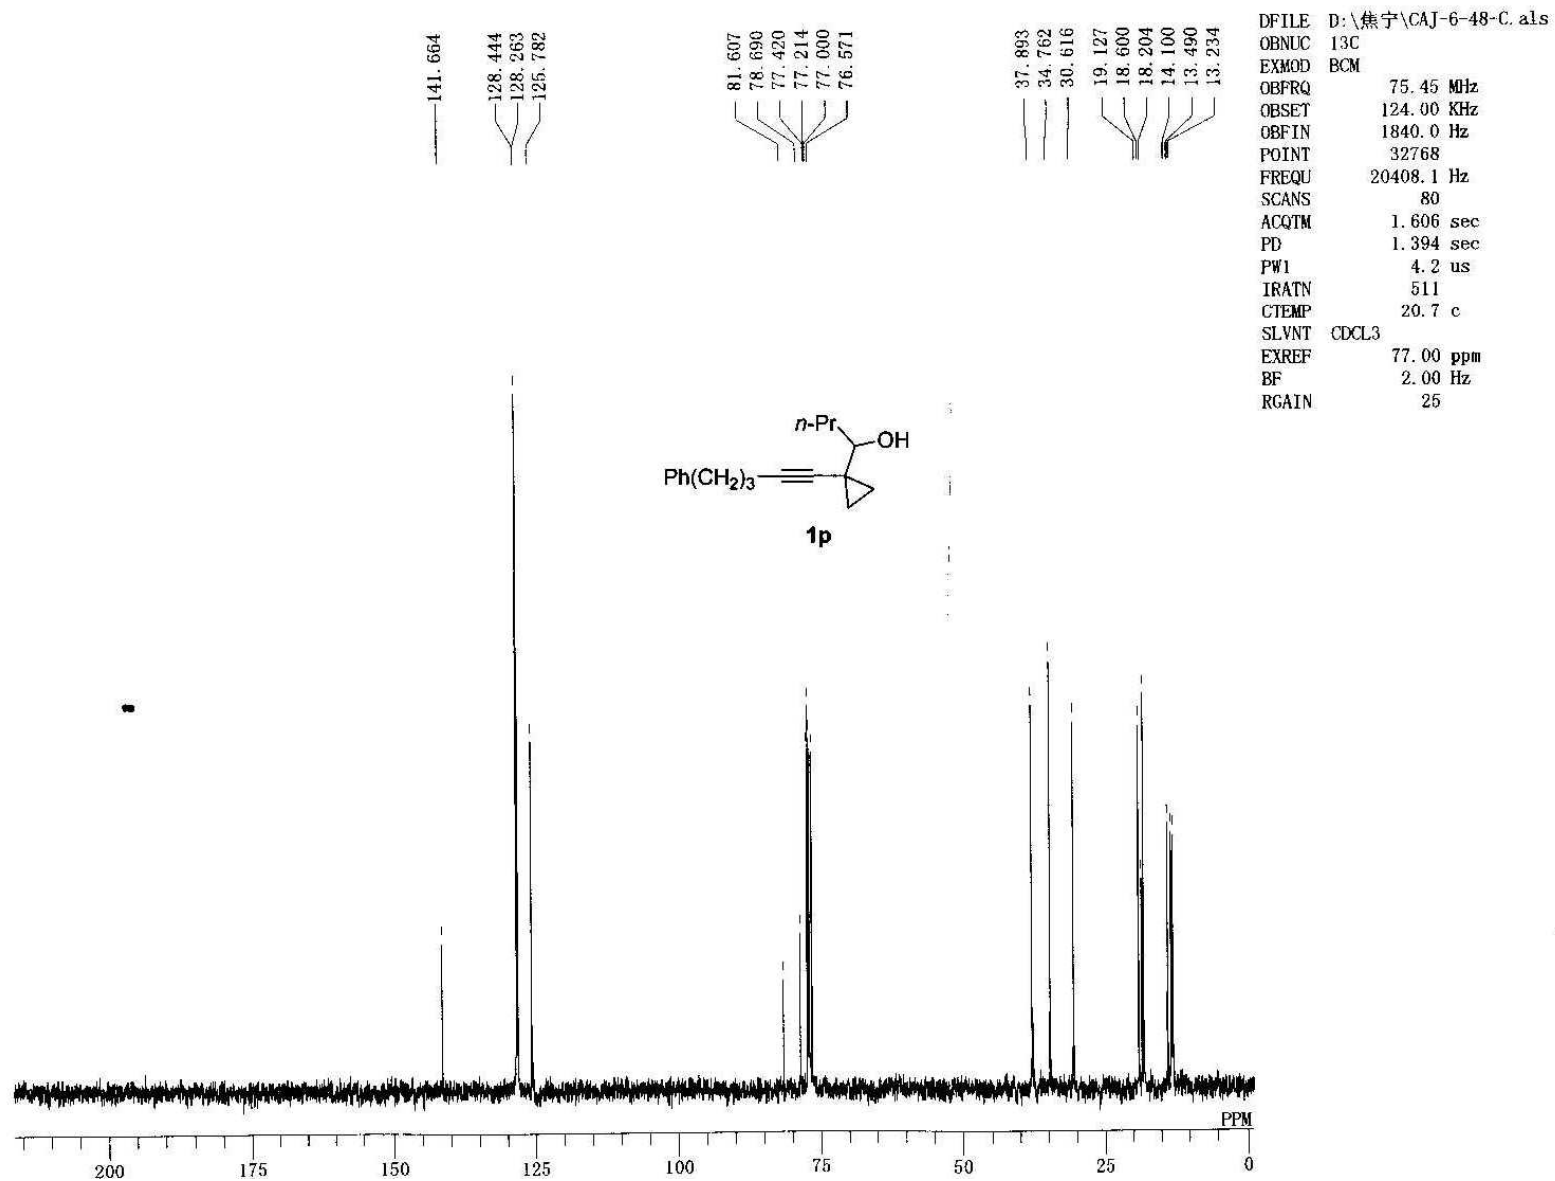



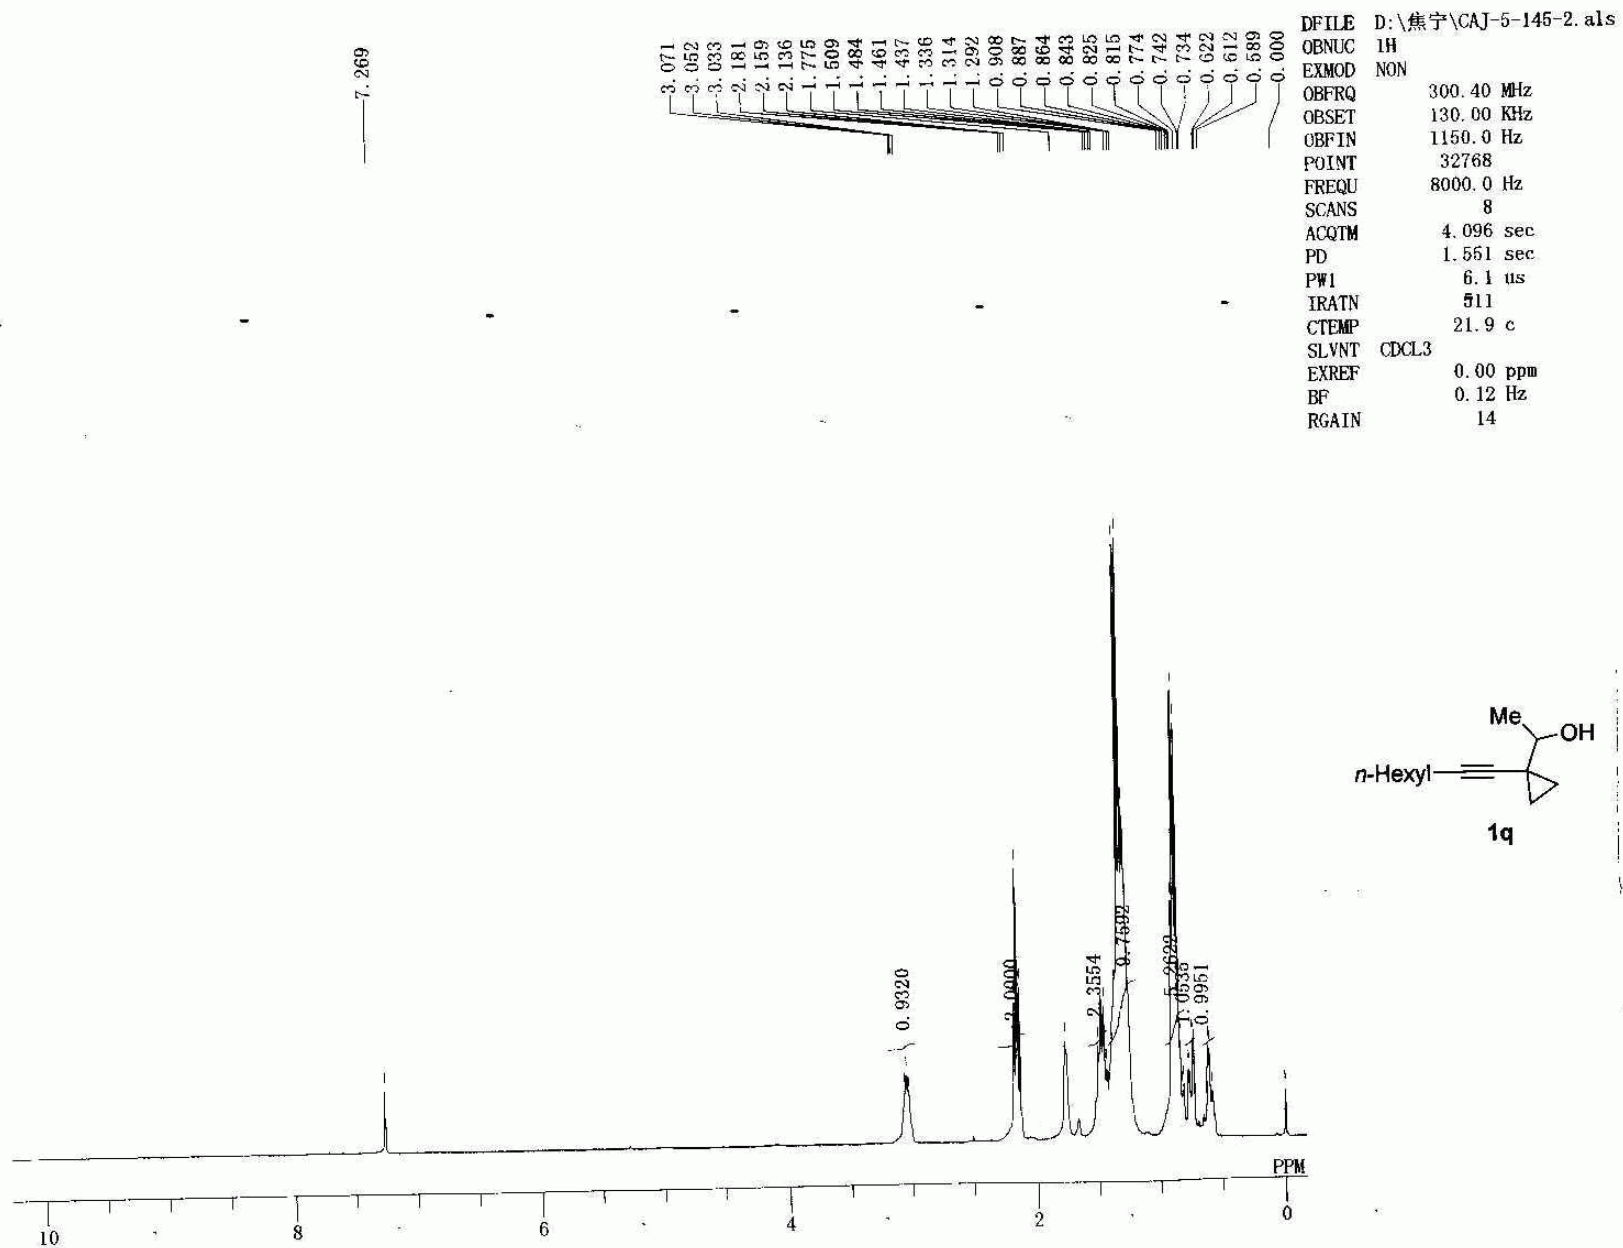

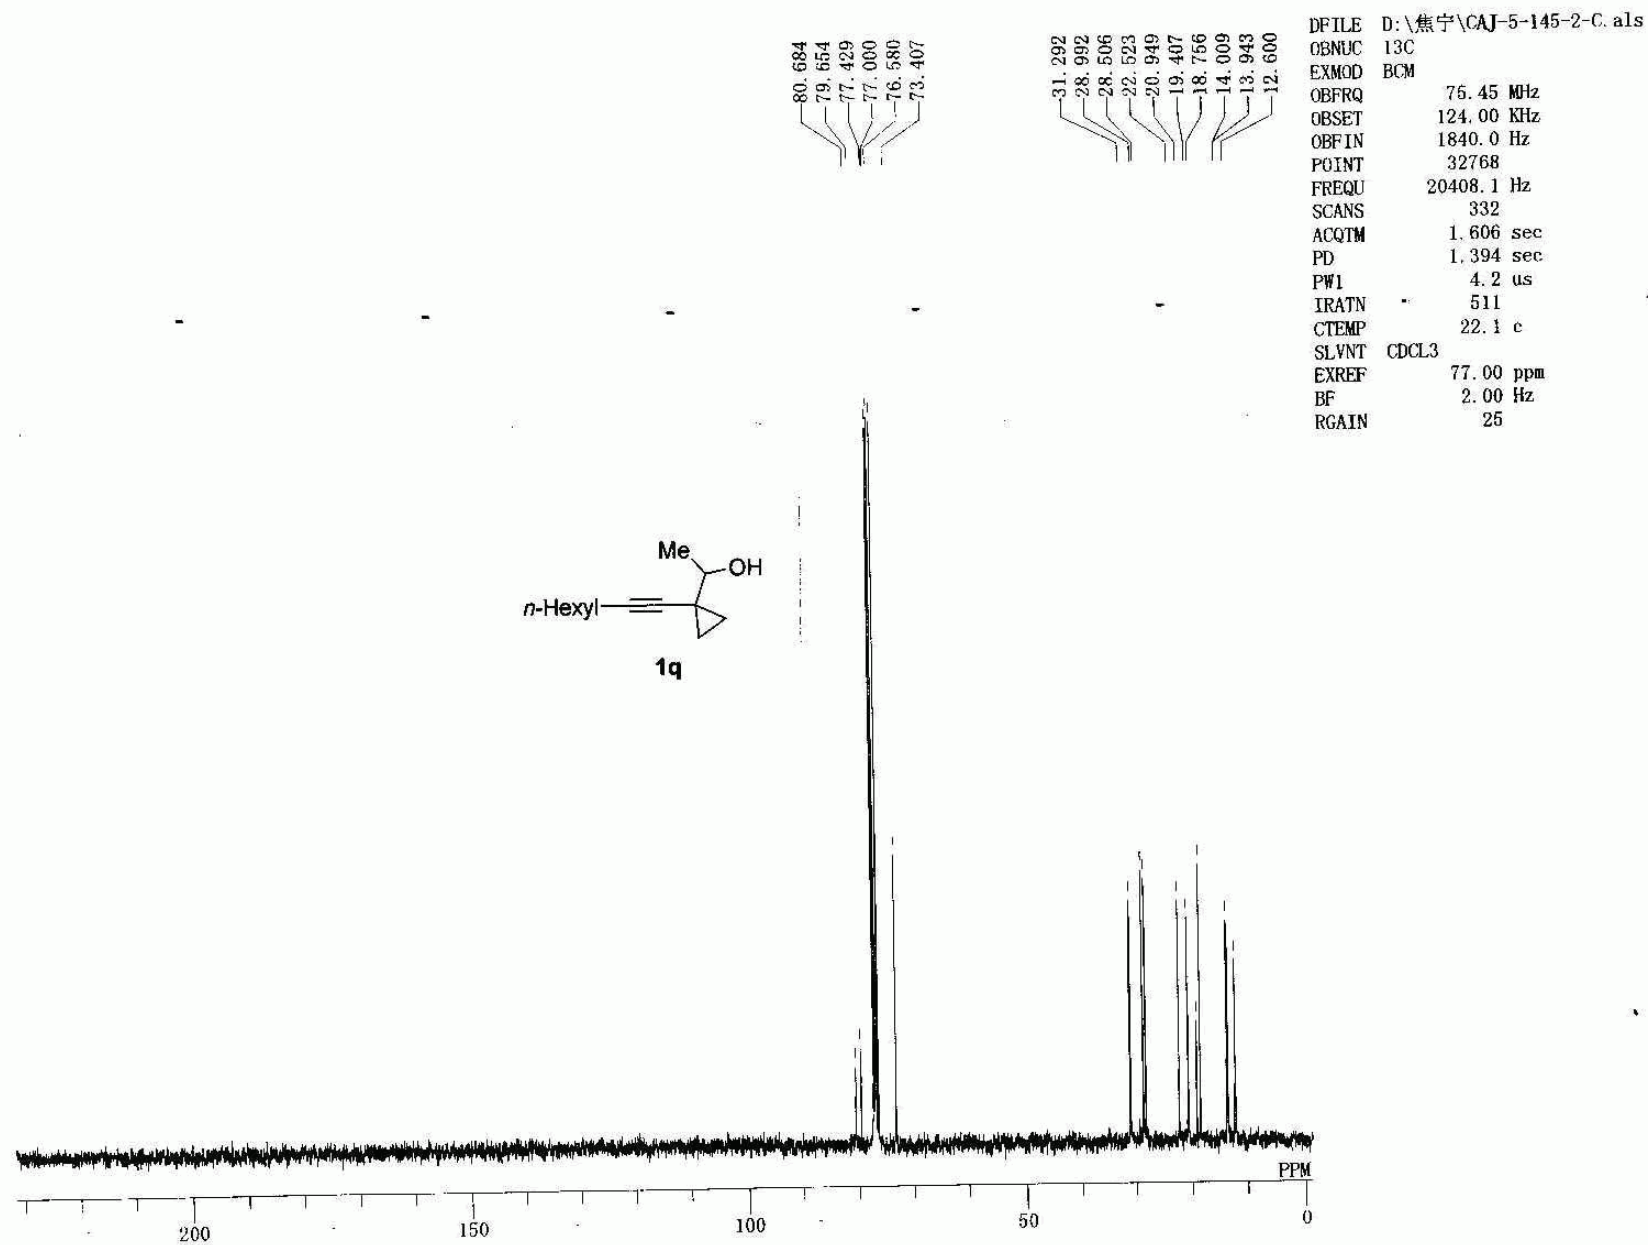

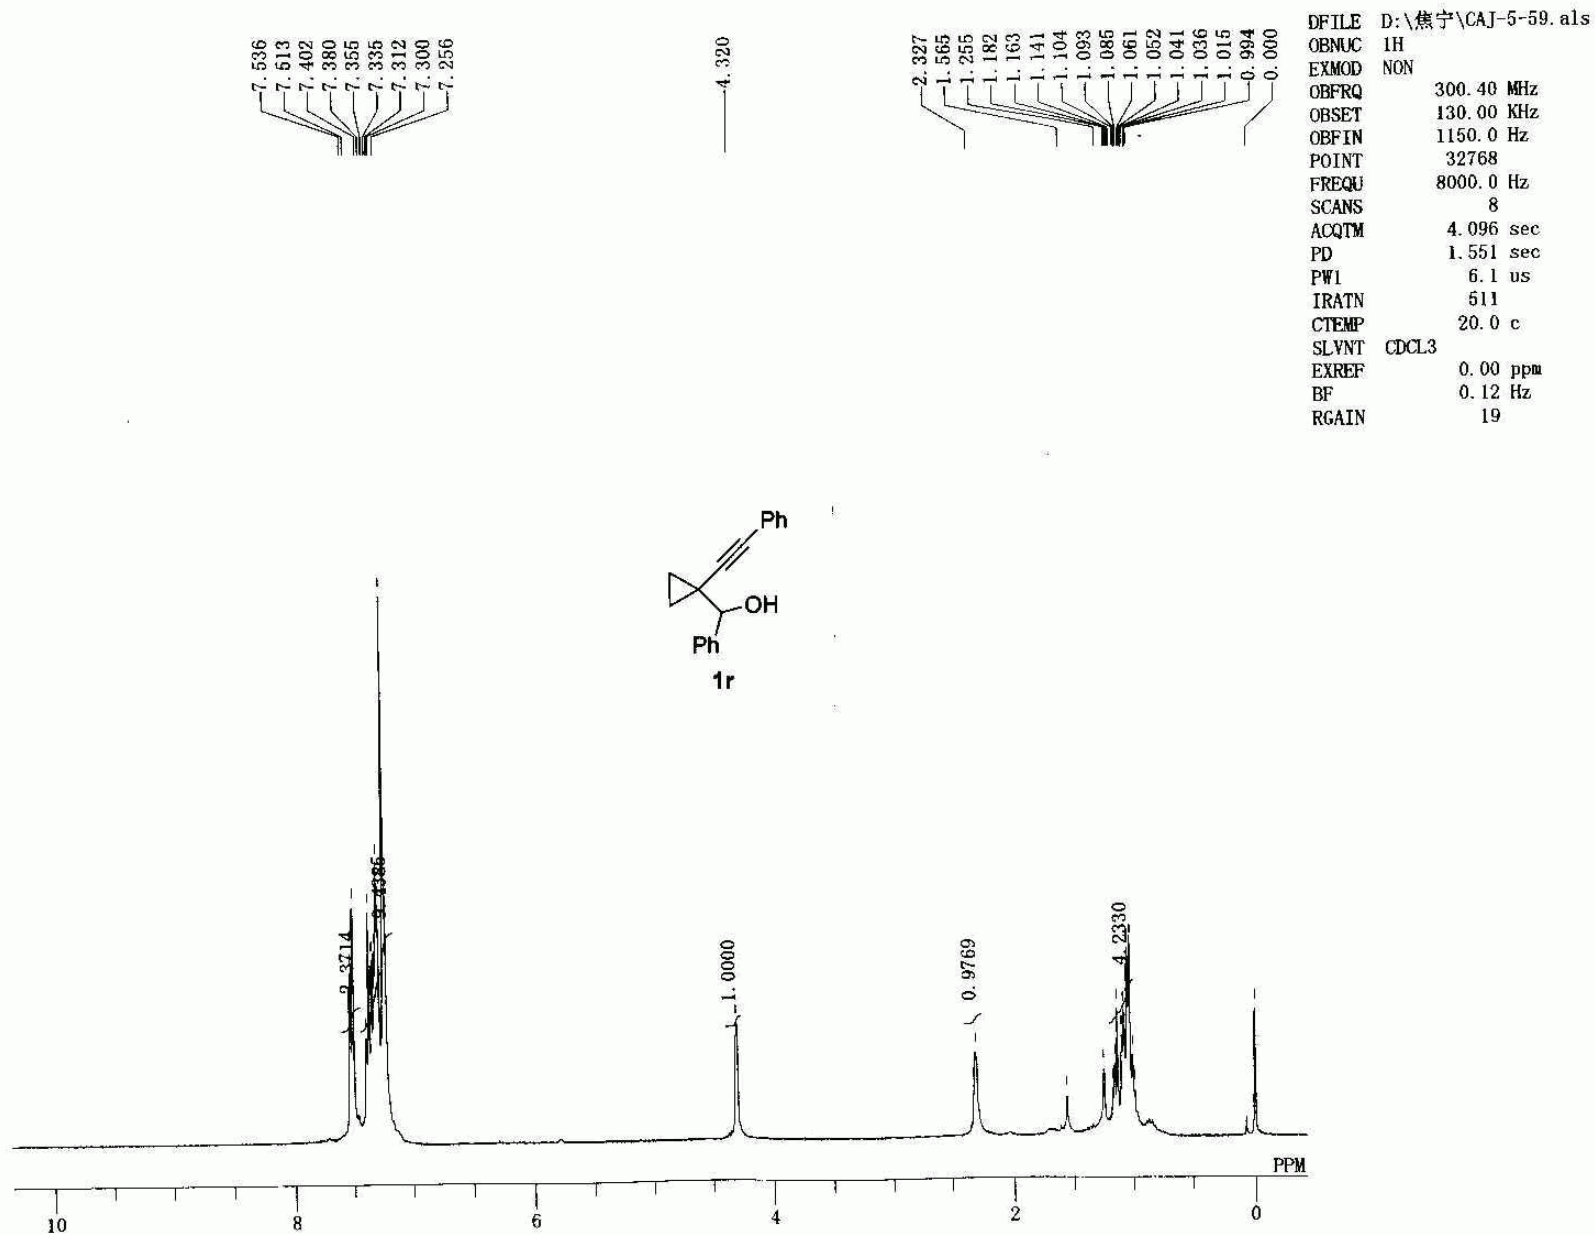

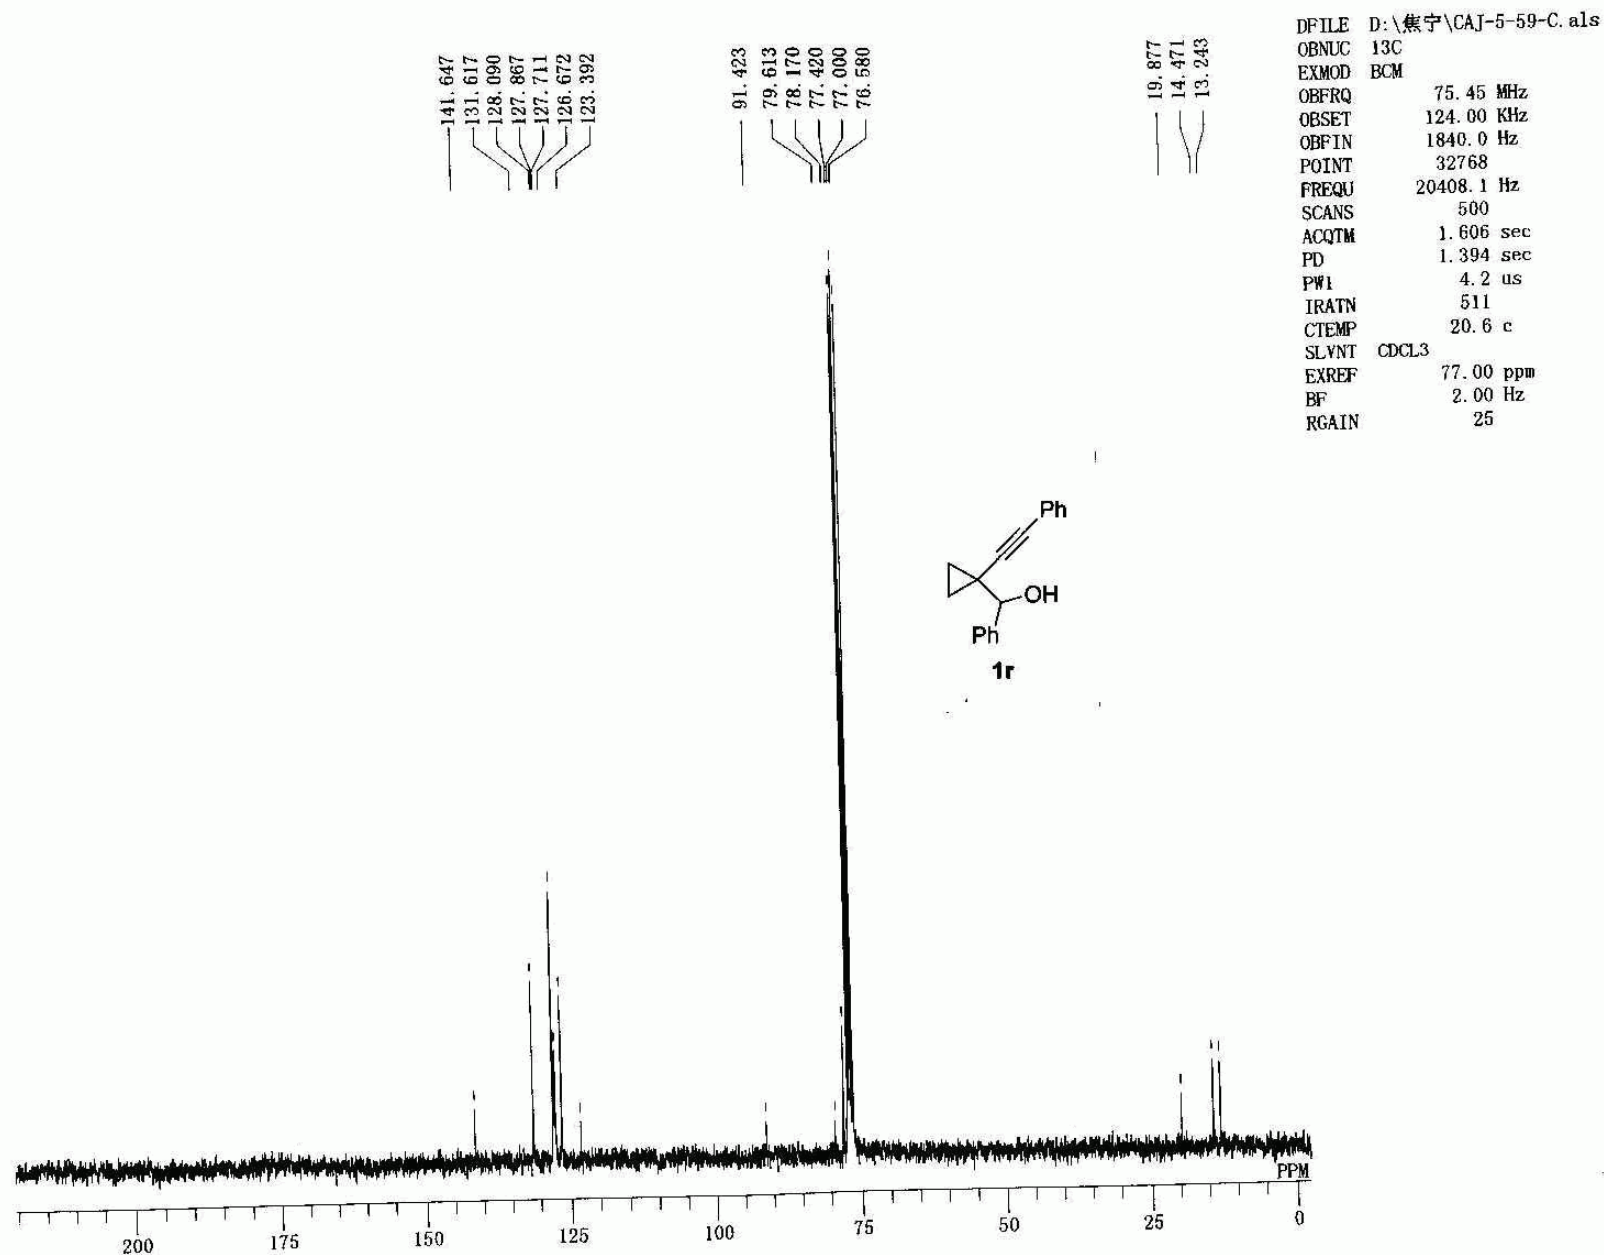

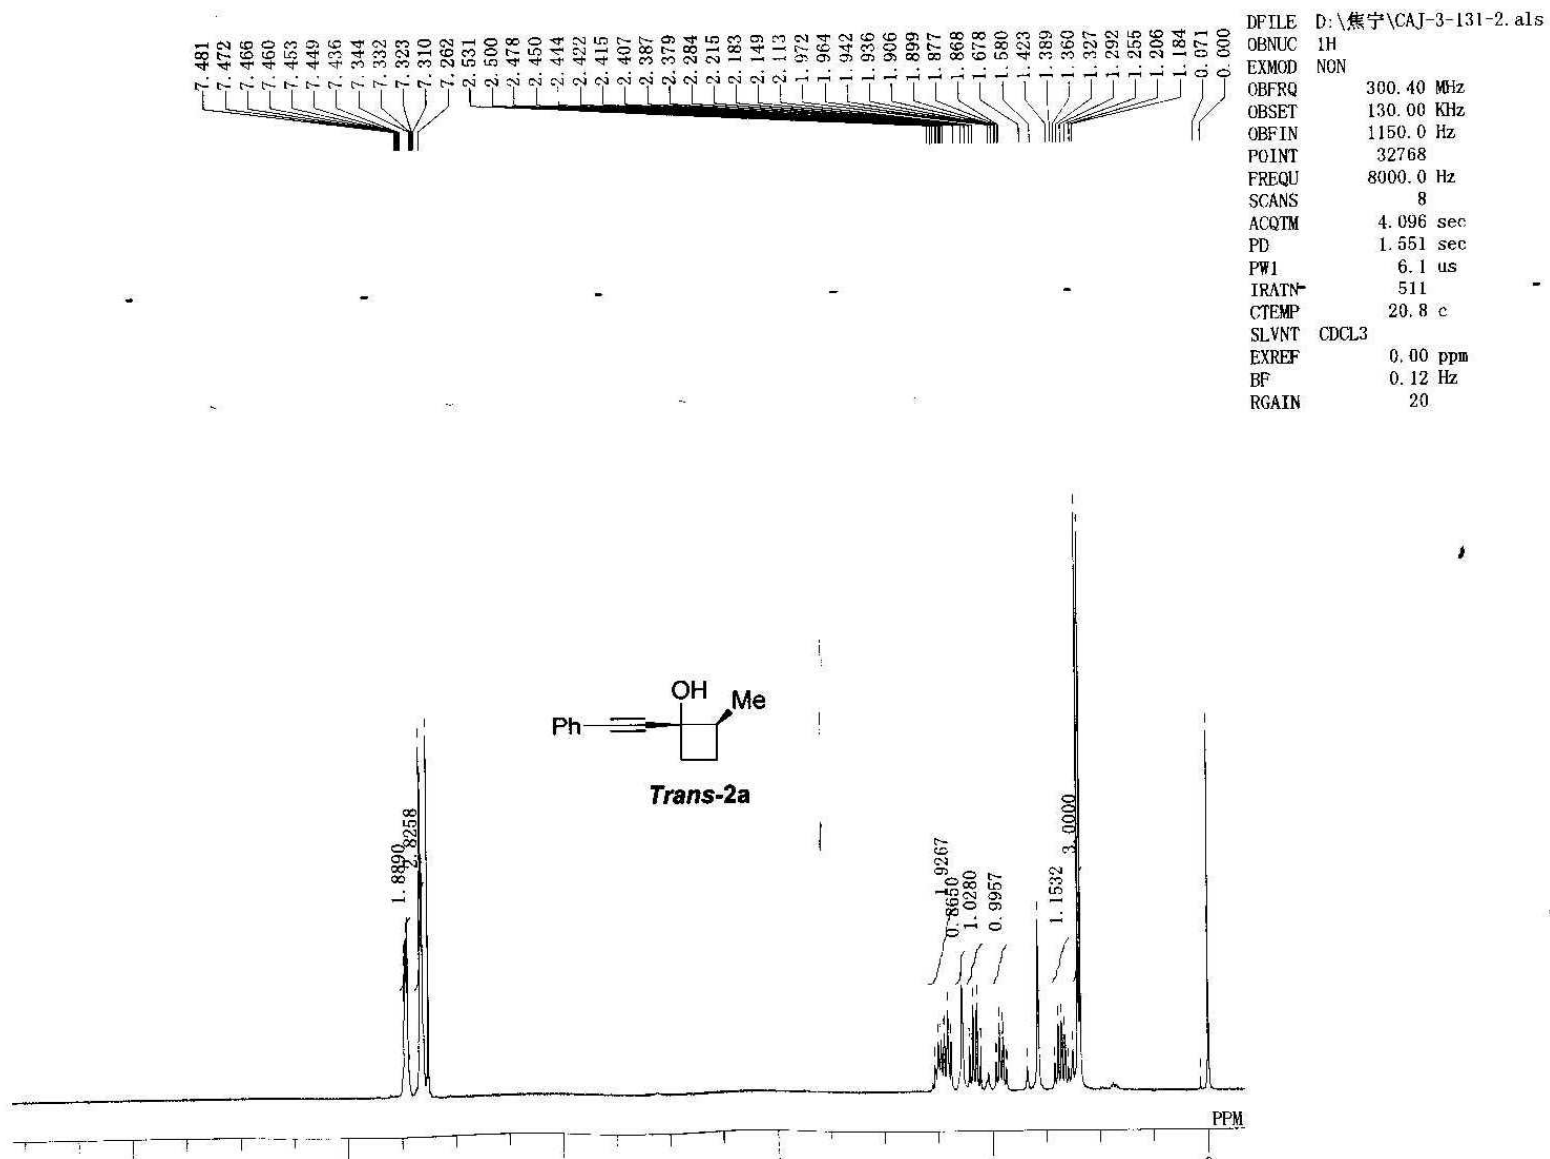

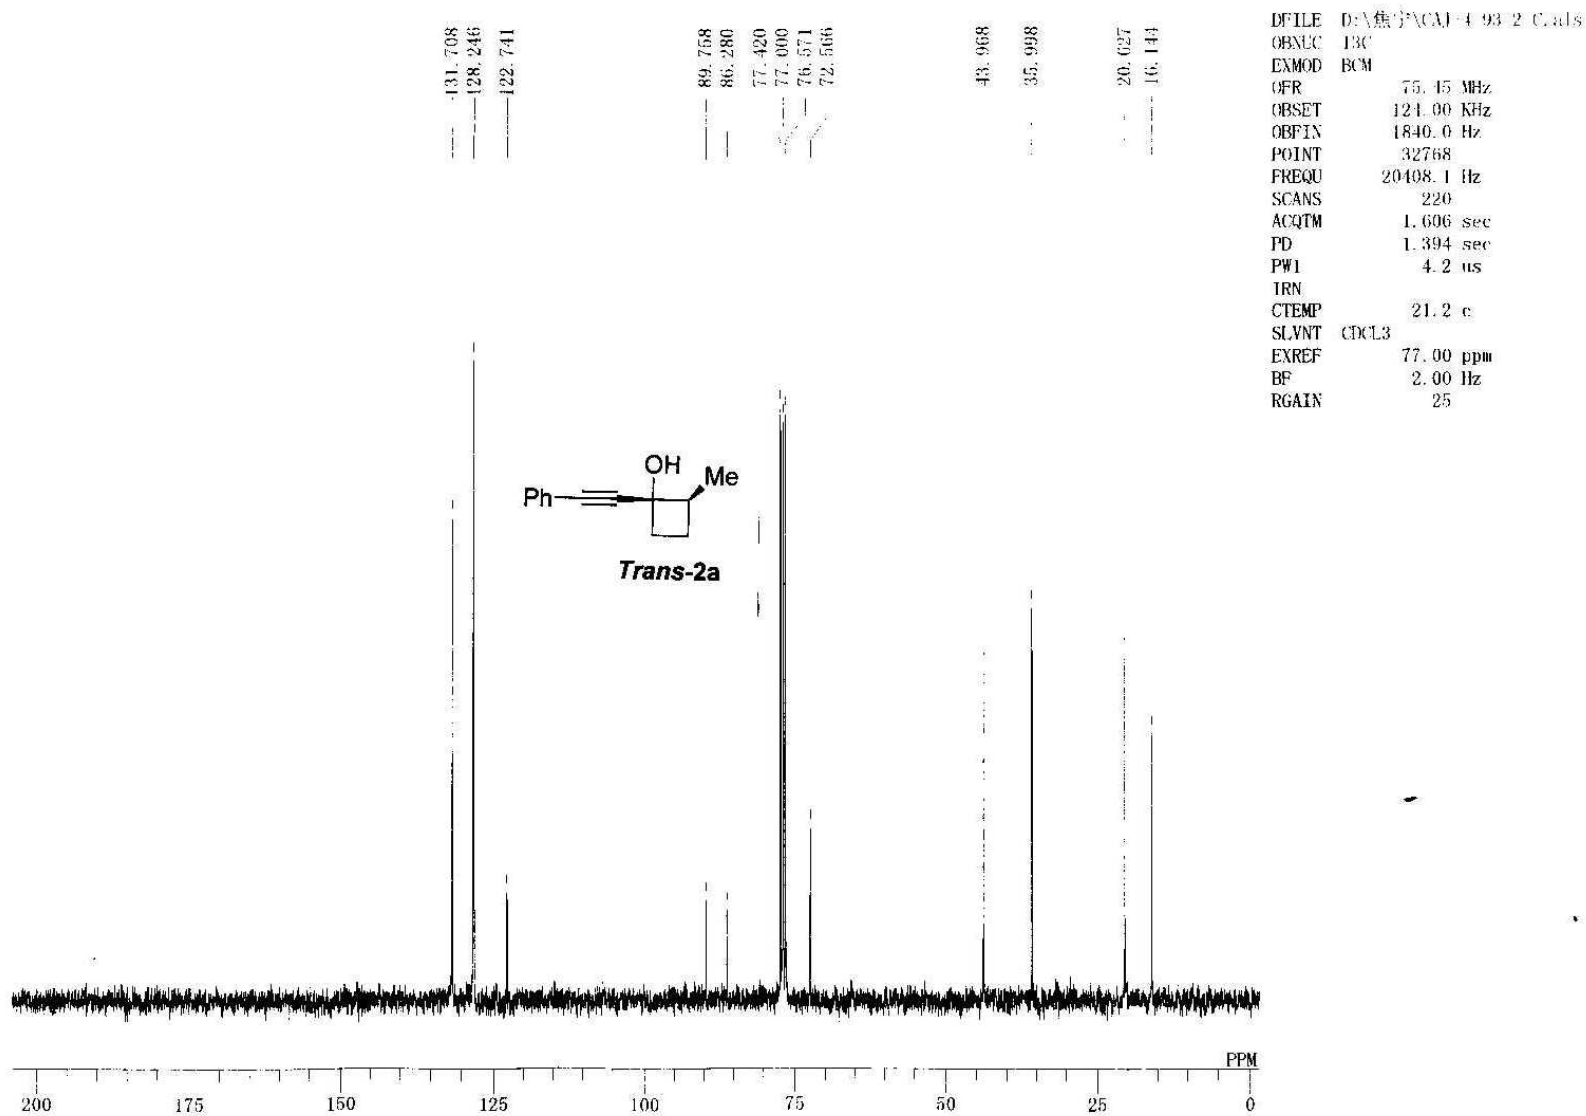

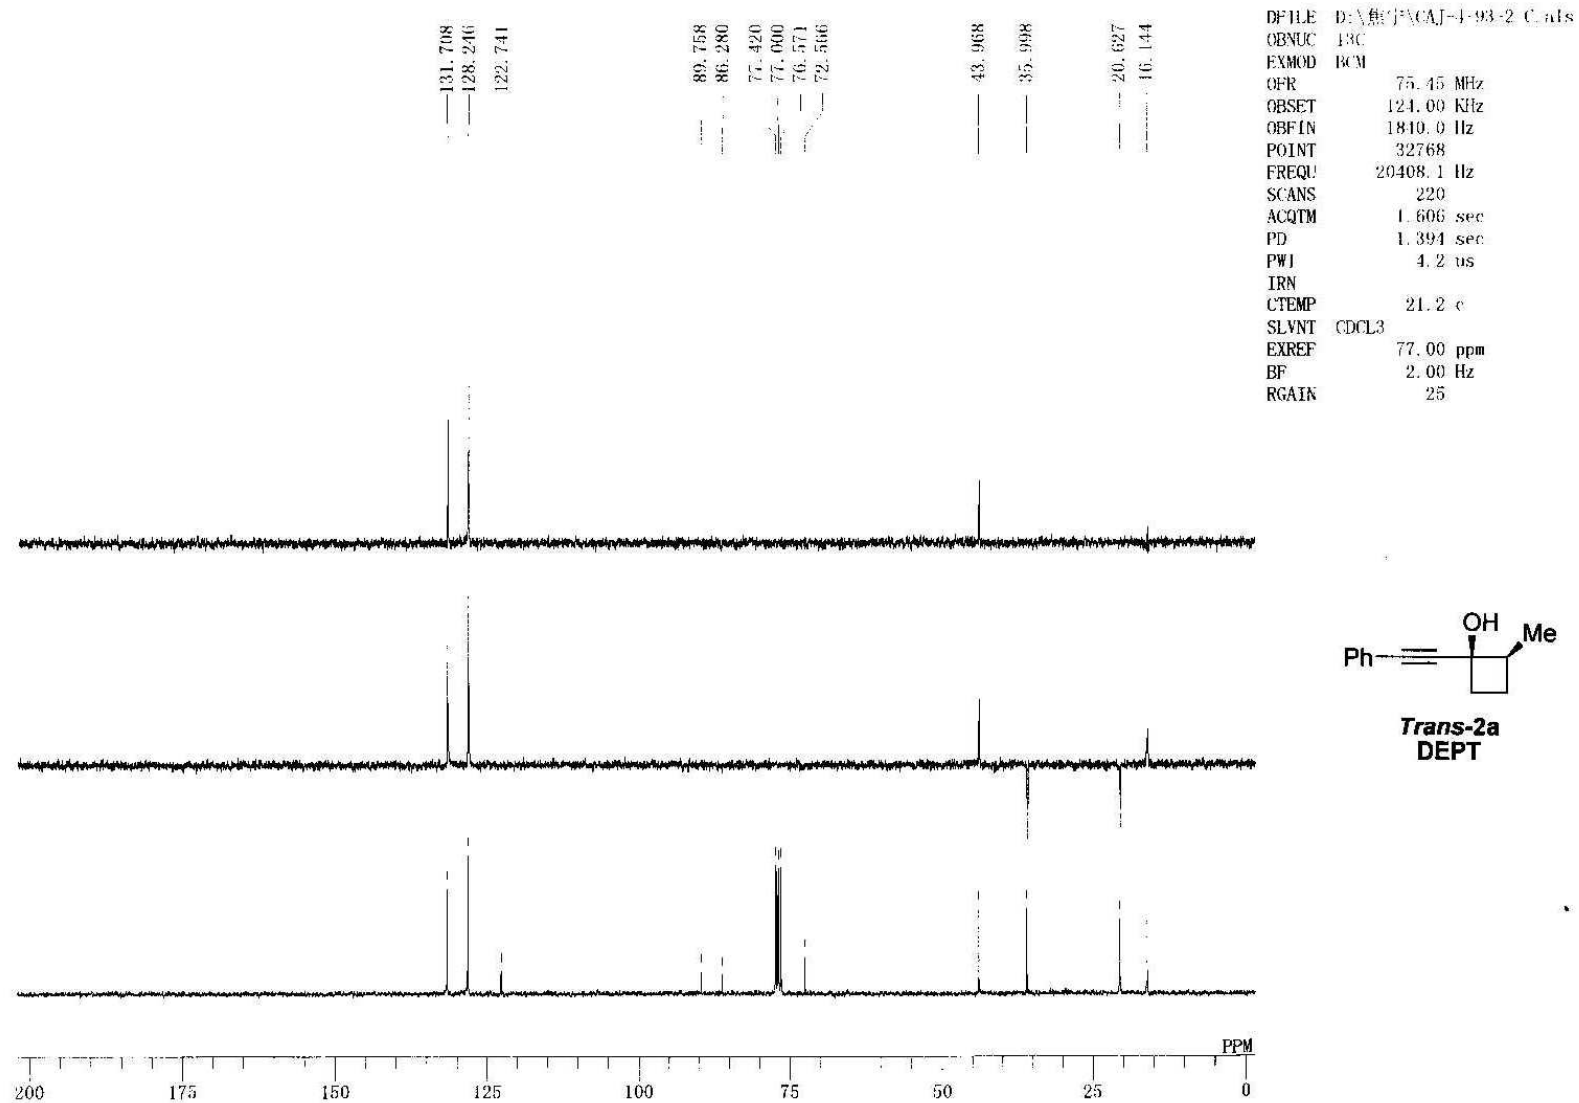

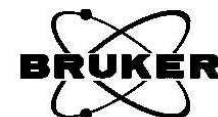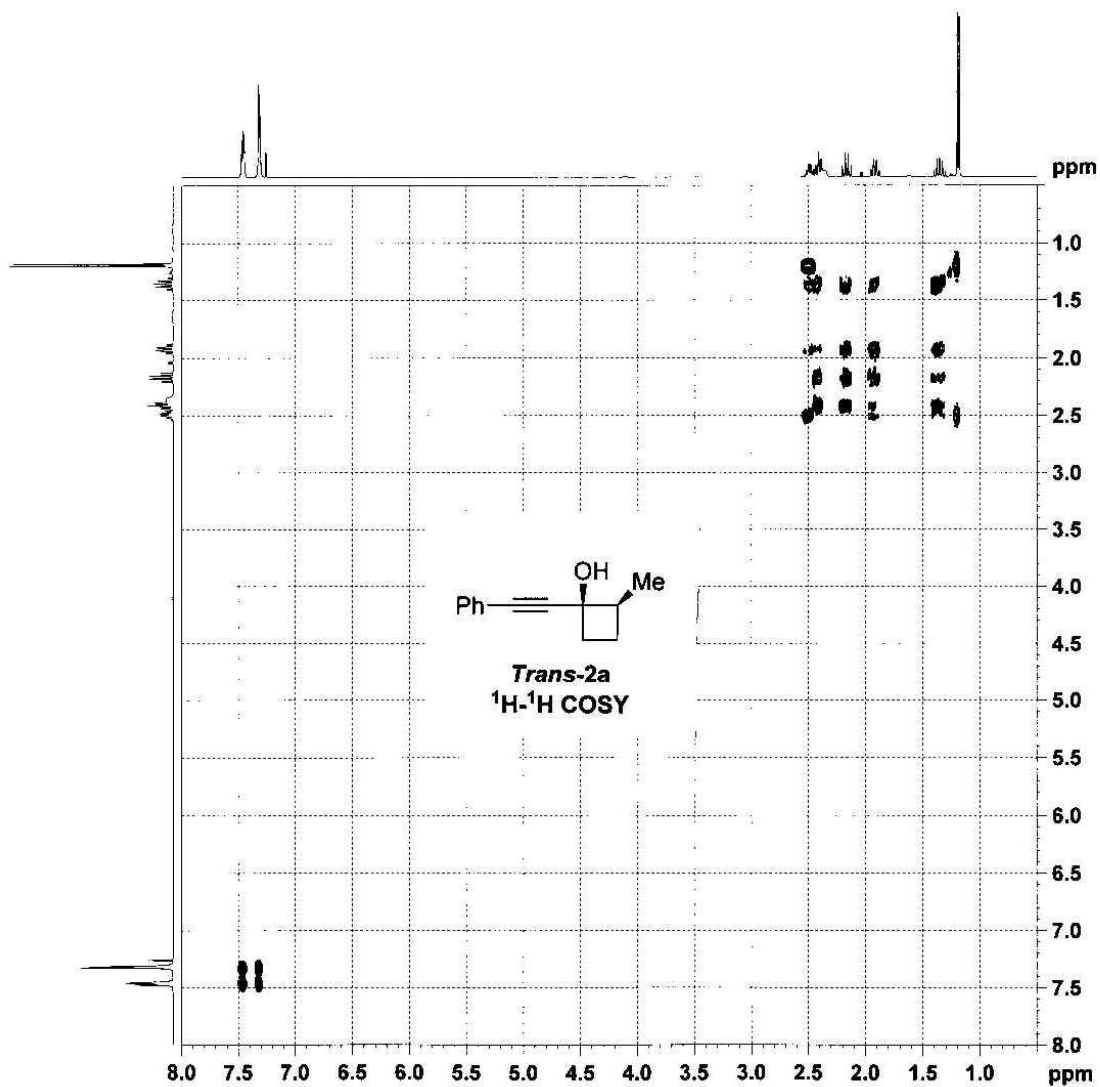

```
NAME CAJ-5-128-2
EXPNO 4
PROCNO 1
Date_ 20090212
Time_ 10.28
INSTRUM spect
PROBHD 5 mm PADUL 13C
PULPROG cosygpmfzf
TD 2048
SOLVENT CDCl3
NS 4
DS 16
SWH 4000.000 Hz
FIDRES 1.953125 Hz
AQ 0.2560500 sec
RG 2050
DW 125.000 usec
DE 6.50 usec
TE 296.7 K
D0 0.00000300 sec
D1 2.00000000 sec
D13 0.00000400 sec
D16 0.00020000 sec
IN0 0.00024990 sec
```

```
===== CHANNEL f1 =====
NUC1 1H
P1 12.43 usec
PL1 -1.00 dB
PL1W 11.92178631 W
SF01 400.1520000 MHz
```

```
===== GRADIENT CHANNEL =====
GPNAM1 SINE.100
GPNAM2 SINE.100
GPNAM3 SINE.100
GPZ1 16.00 %
GPZ2 12.00 %
GPZ3 40.00 %
P16 1000.00 usec
ND0 1
TD 128
SF01 400.152 MHz
FIDRES 31.261875 Hz*
SW 10.000 ppm
FMODE QF
SI 1024
SF 400.1500000 MHz
WDW SINE
SSB 0
LB 0.00 Hz
GB 0
PC 1.40
SI 1024
MC2 QF
SF 400.1500000 MHz
WDW SINE
SSB 0
```



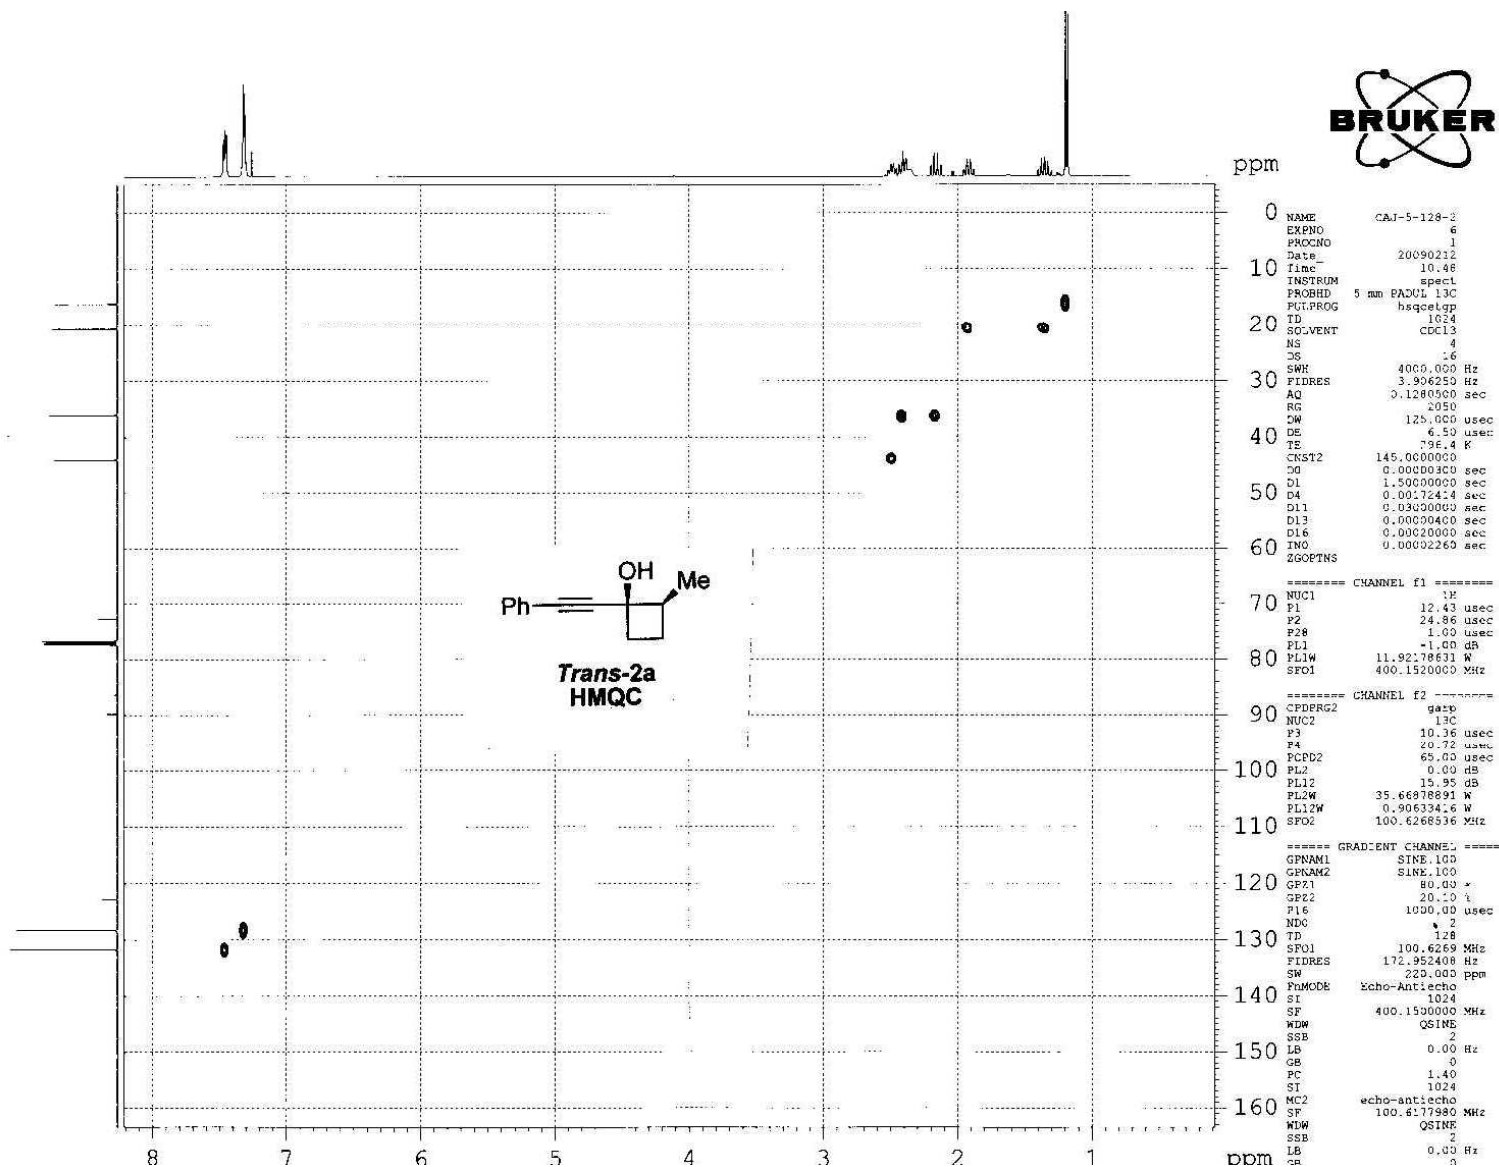

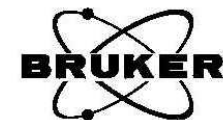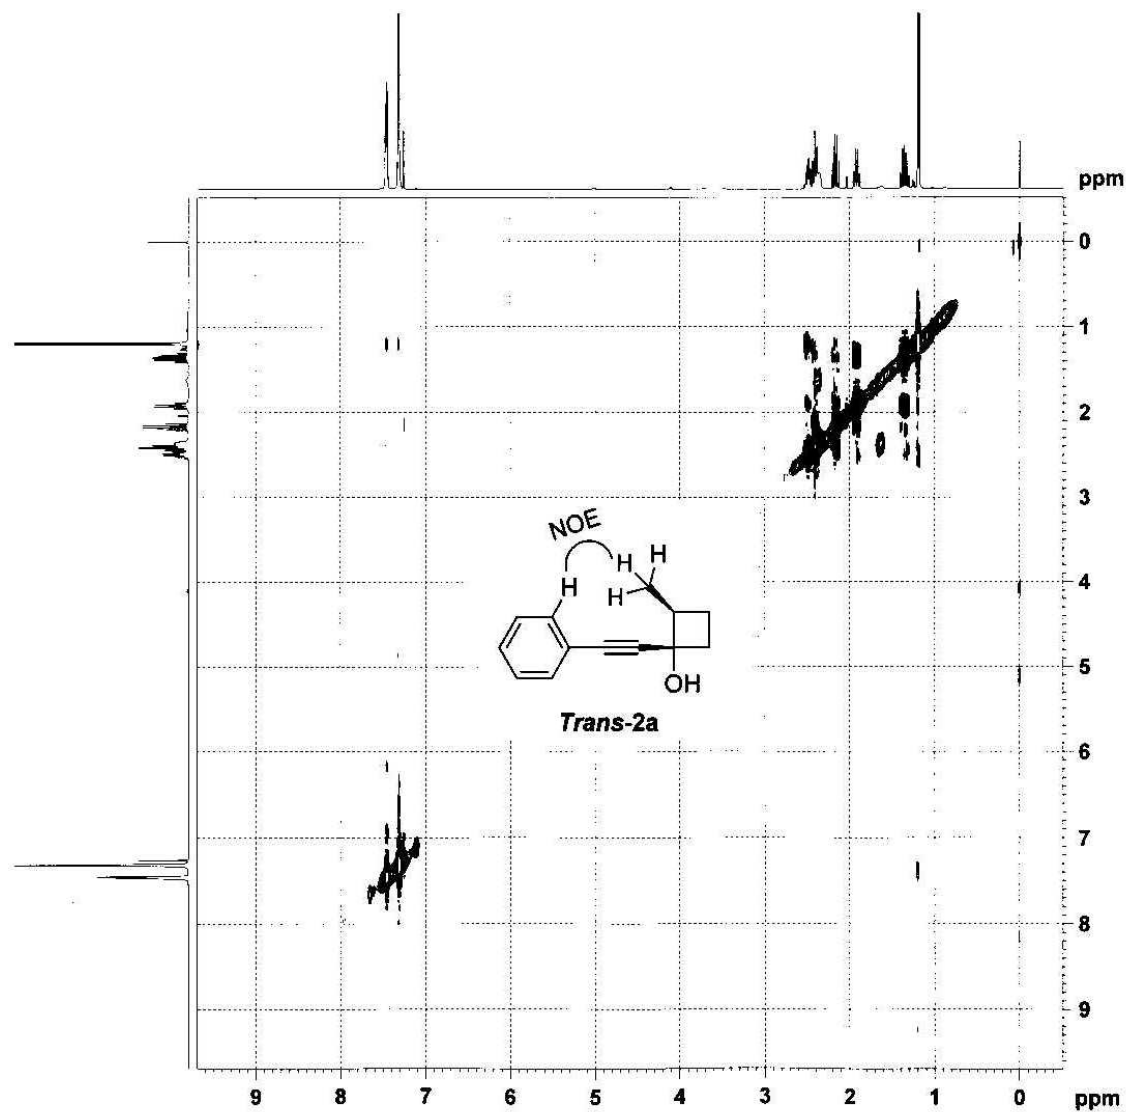

NAME CAJ-5-128-2  
EXPNO 51  
PROCNO 1  
Date\_ 20090212  
Time 16.11  
INSTRUM spect  
PROBHD 5 mm PADUL 13C  
PULPROG noesyph  
TD 2048  
SOLVENT CDC13  
NS 160  
DS 16  
SWH 4084.967 Hz  
FIDRES 1.994613 Hz  
AQ 0.2507252 sec  
RG 128  
DW 122.400 usec  
DE 6.50 usec  
TE 295.9 K  
D0 0.00010657 sec  
D1 1.00000000 sec  
DS 0.69999999 sec  
IN0 0.00024480 sec

----- CHANNEL f1 -----  
NUC1 1H  
P1 12.43 usec  
PL1 -1.00 dB  
PL1W 11.92178631 W  
SFO1 400.1518420 MHz  
ND0 1  
TD 128  
SFO1 400.1518 MHz  
FIDRES 31.915401 Hz  
SW 10.209 ppm  
FnMODE States-TPPI  
SI 1024  
SF 400.1500049 MHz  
WDW QSINE  
SSB 2  
LB 0.00 Hz  
GB 0  
PC 1.00  
SI 1024  
MC2 States-TPPI  
SF 400.1500044 MHz  
WDW QSINE  
SSB 2  
LB 0.00 Hz  
GB 0

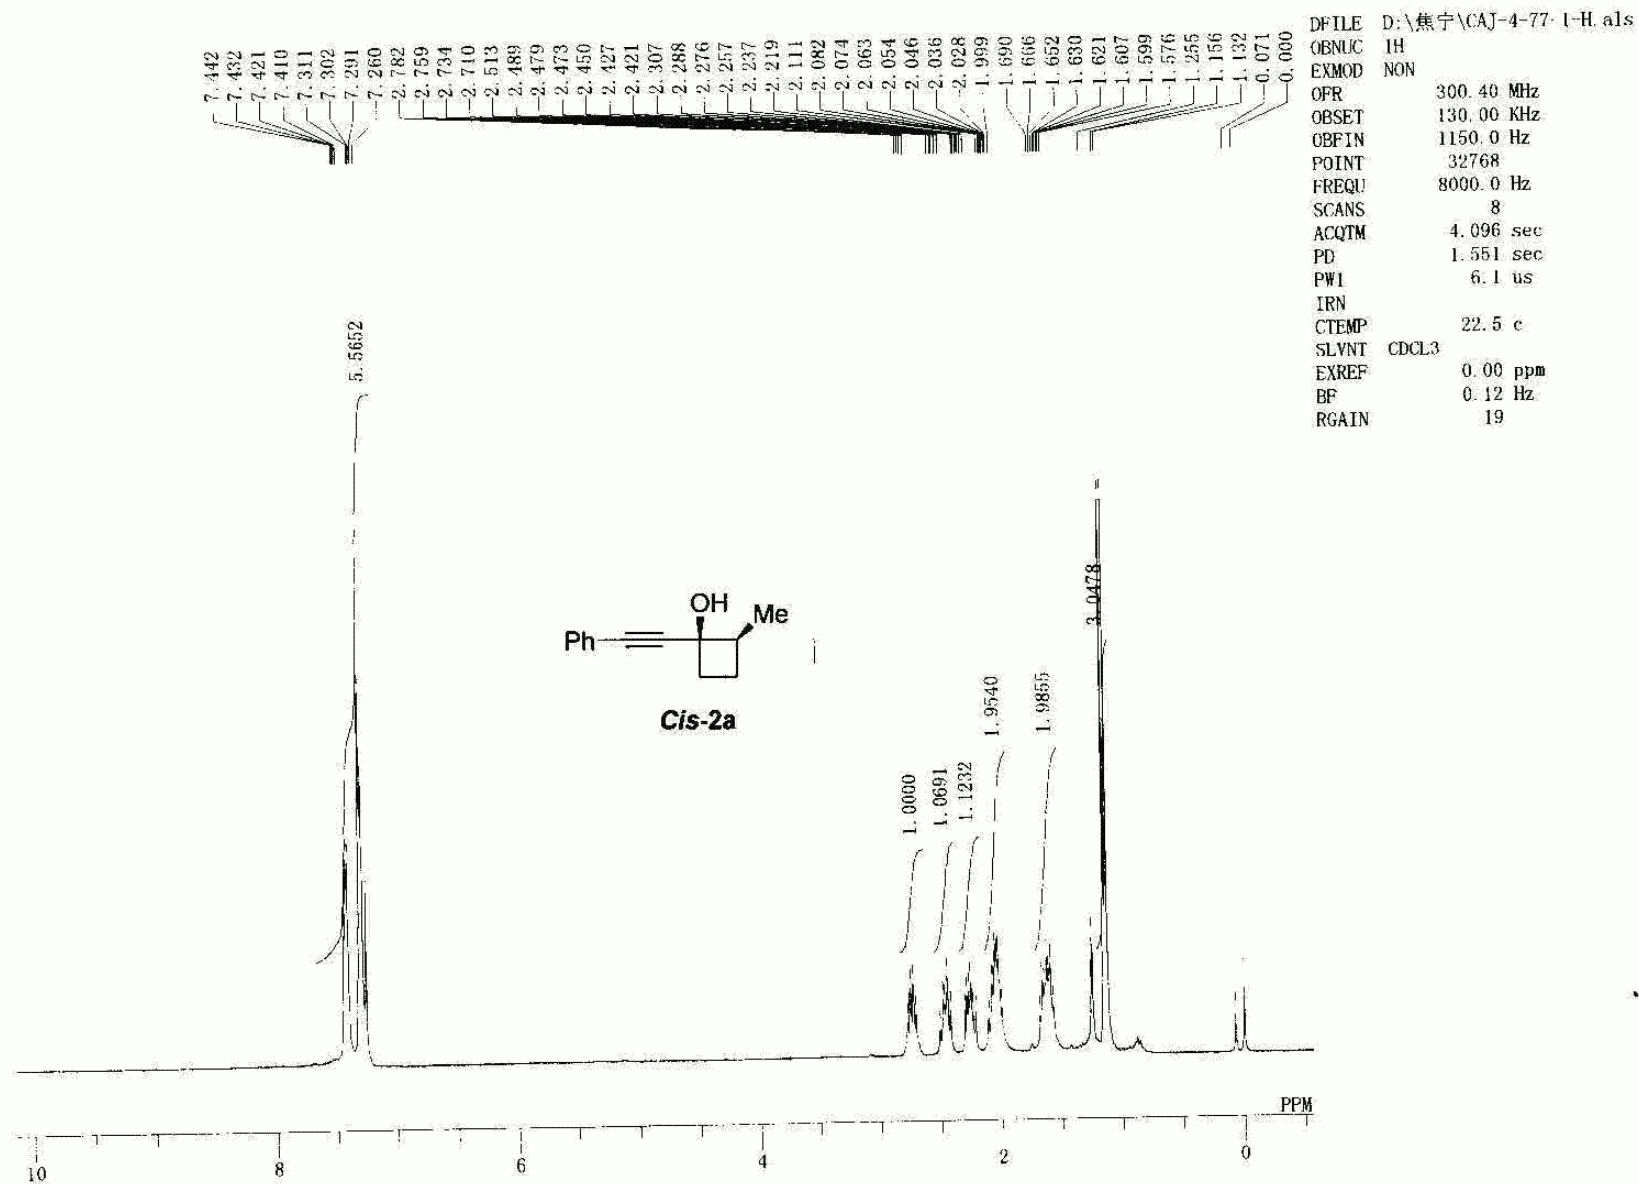

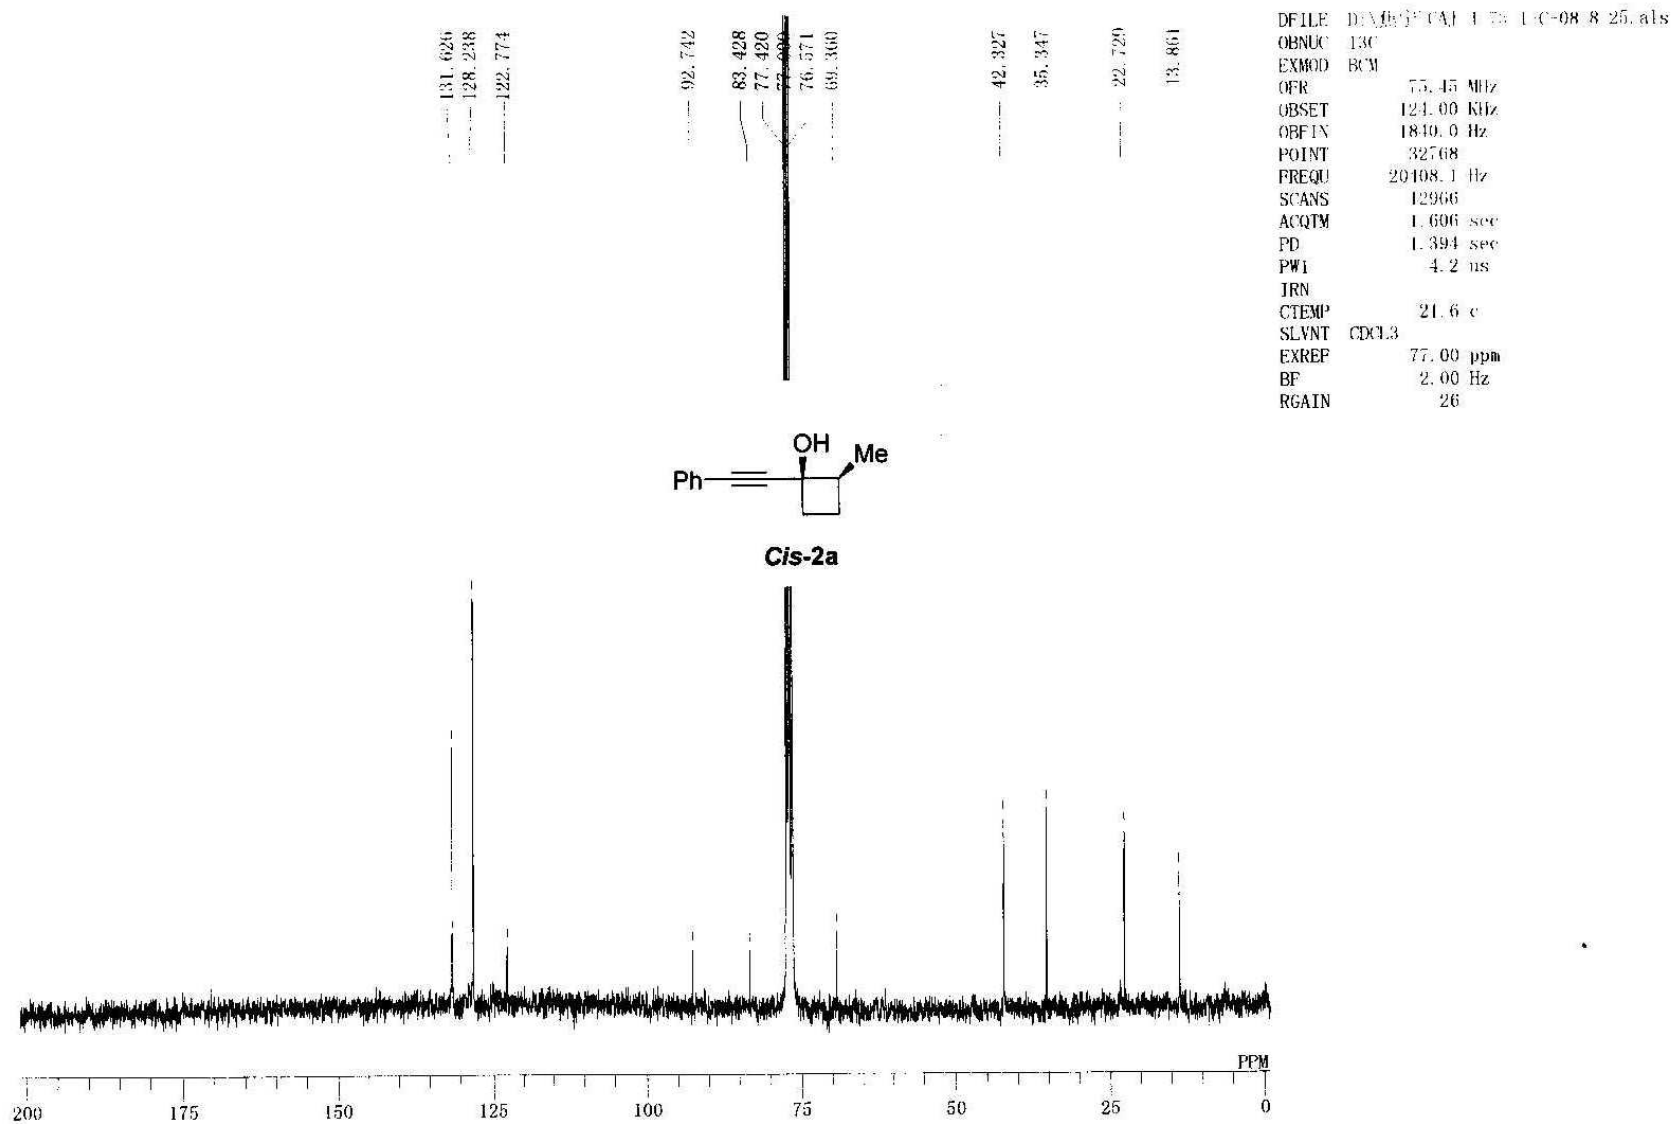

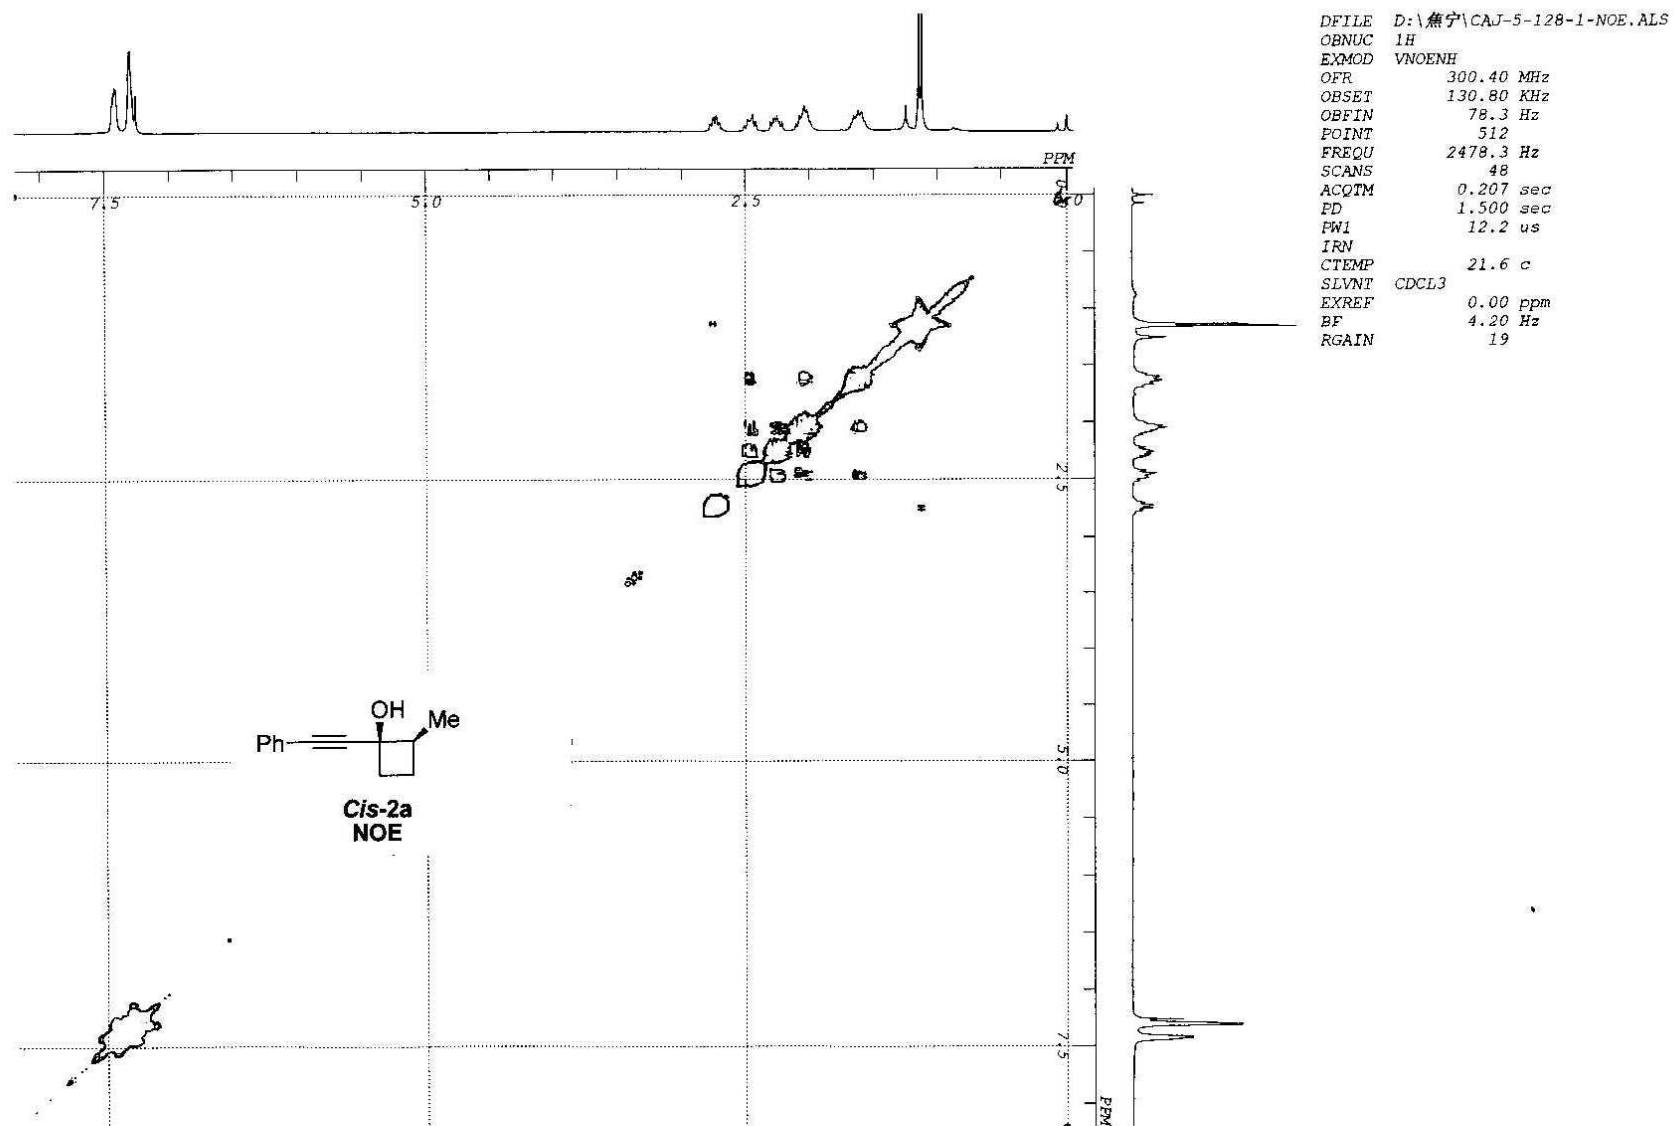

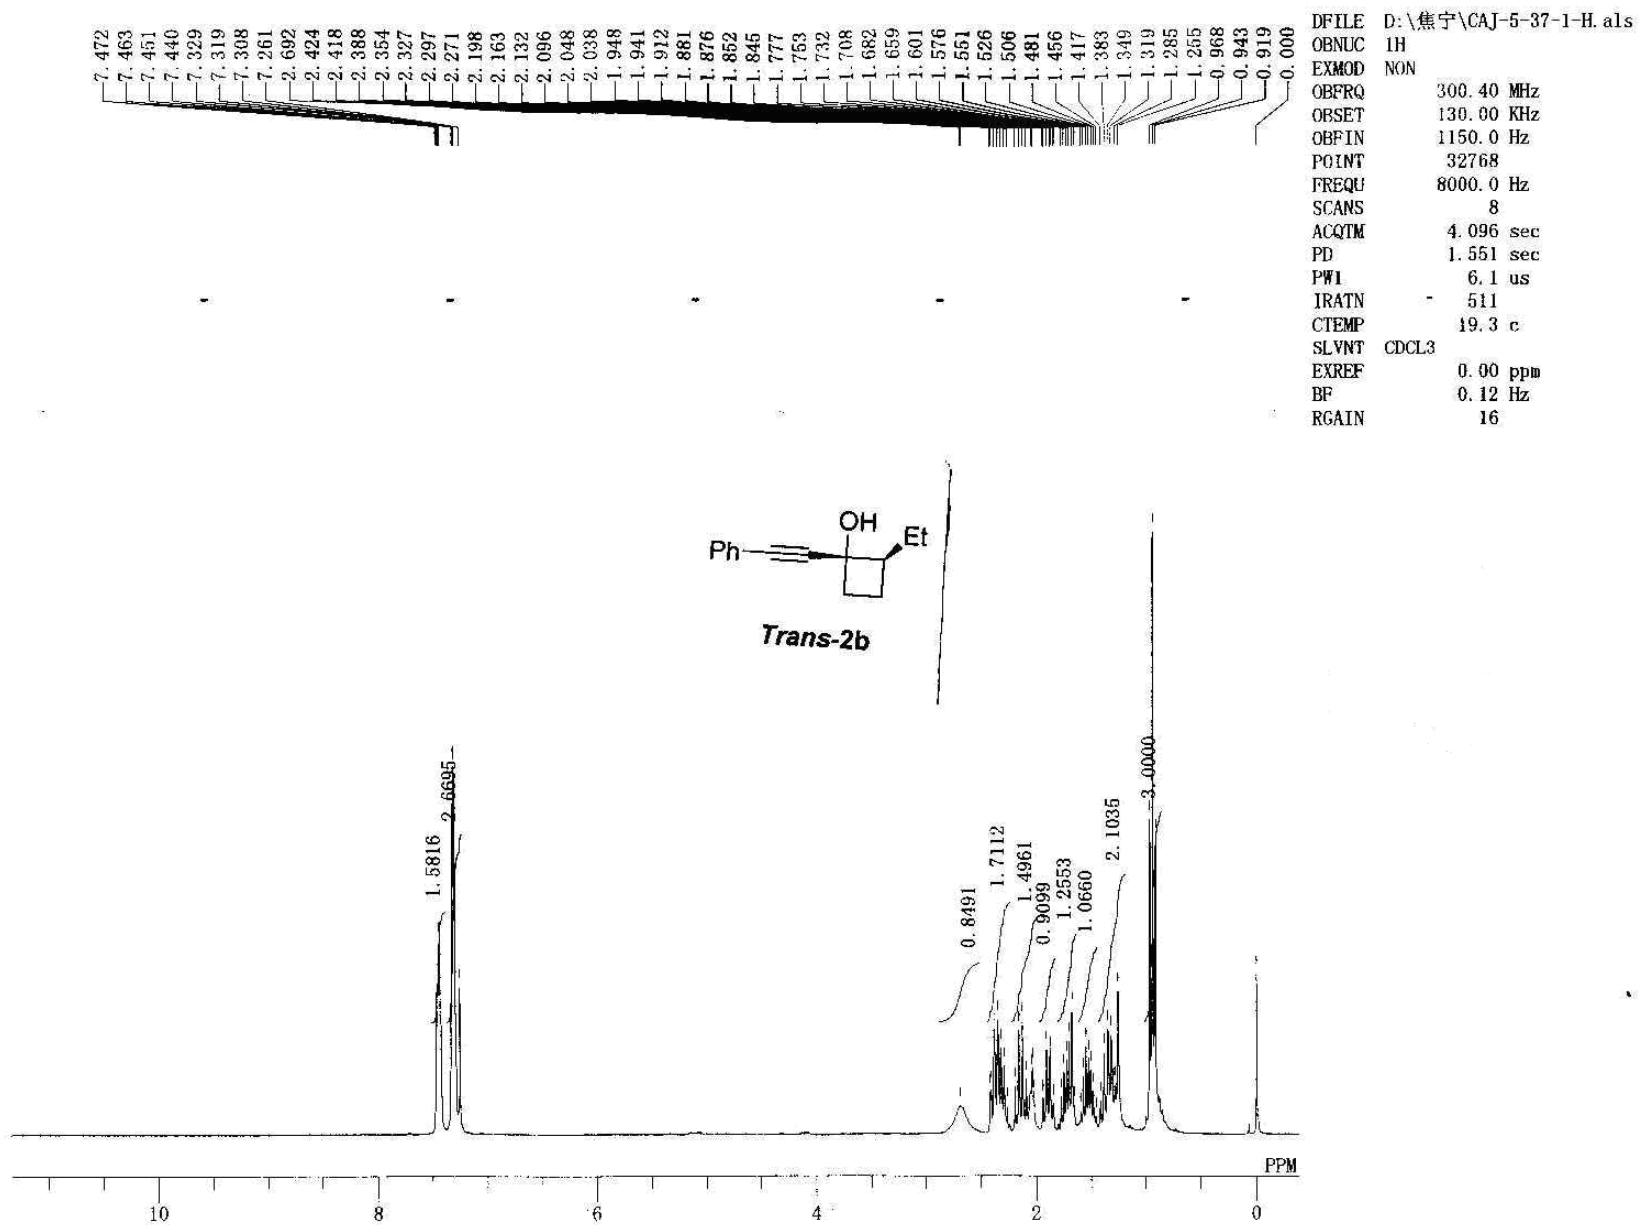

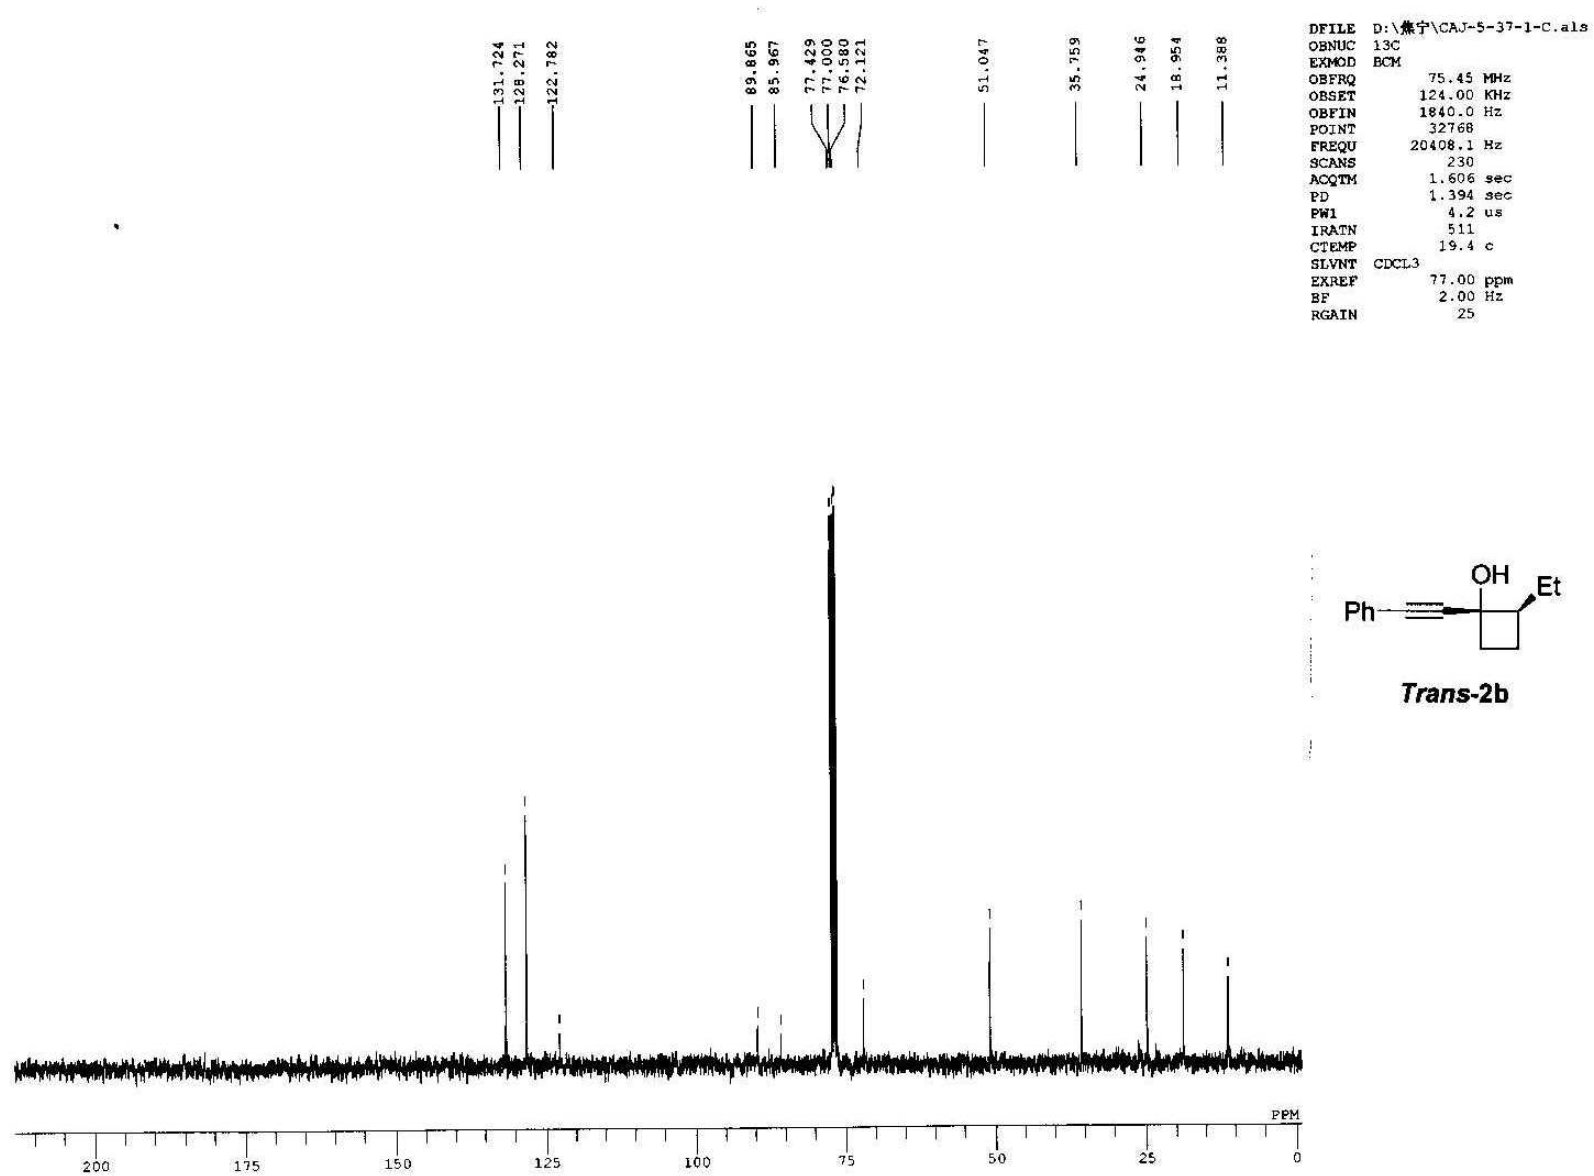

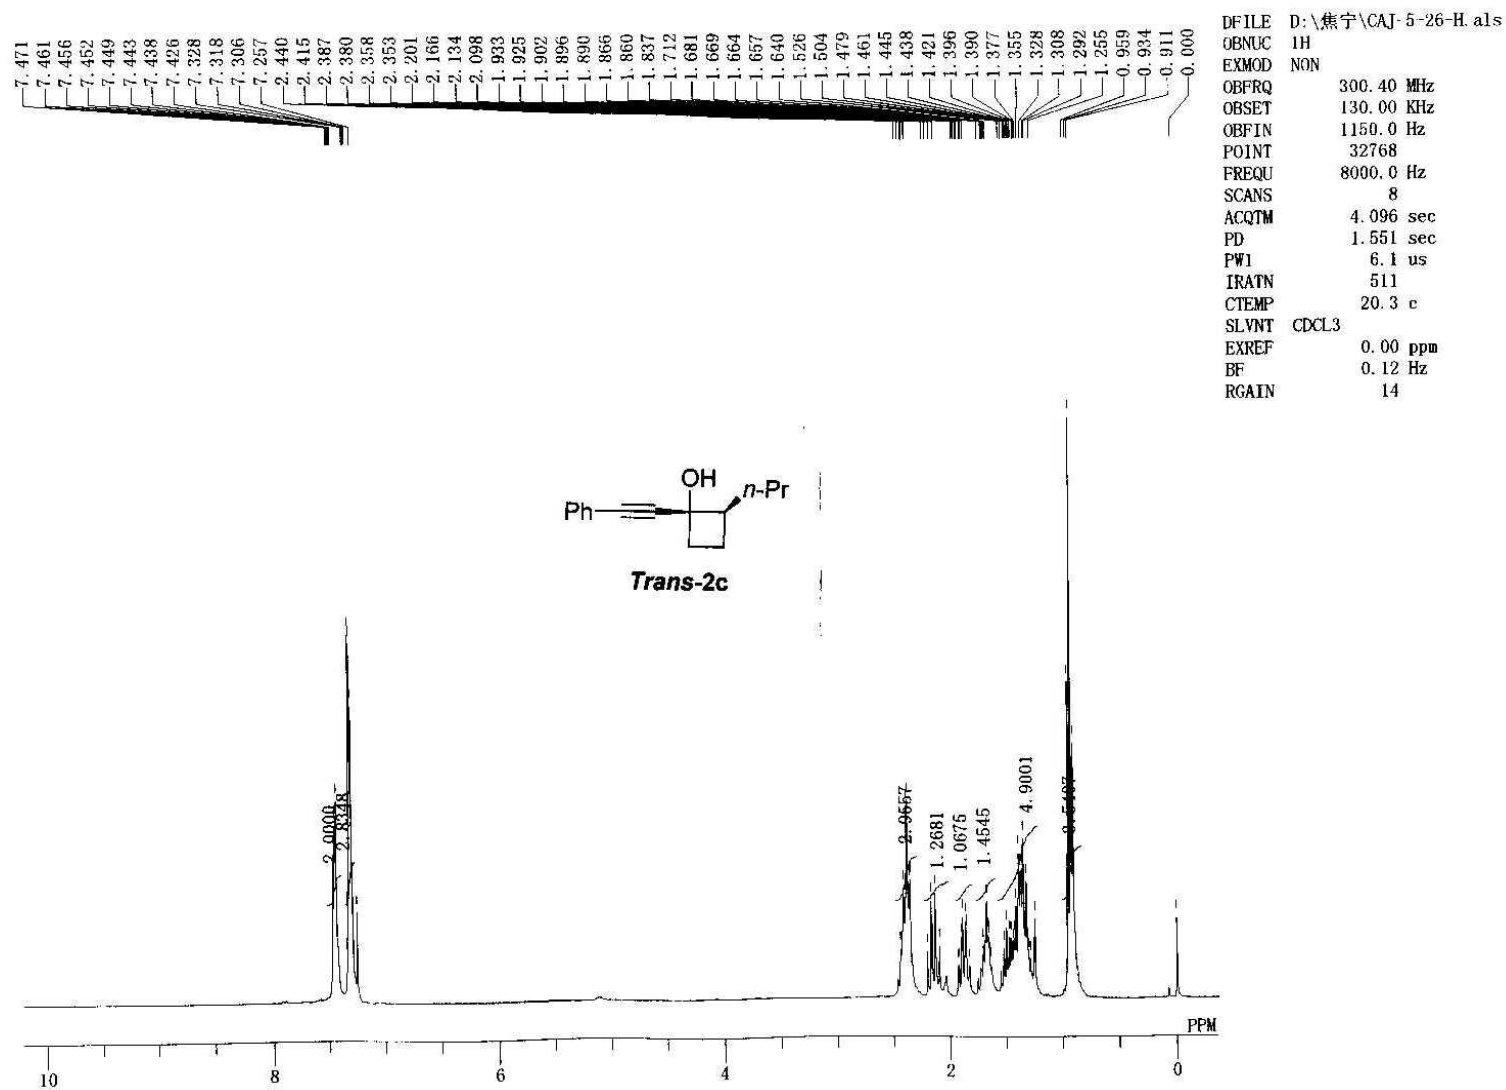



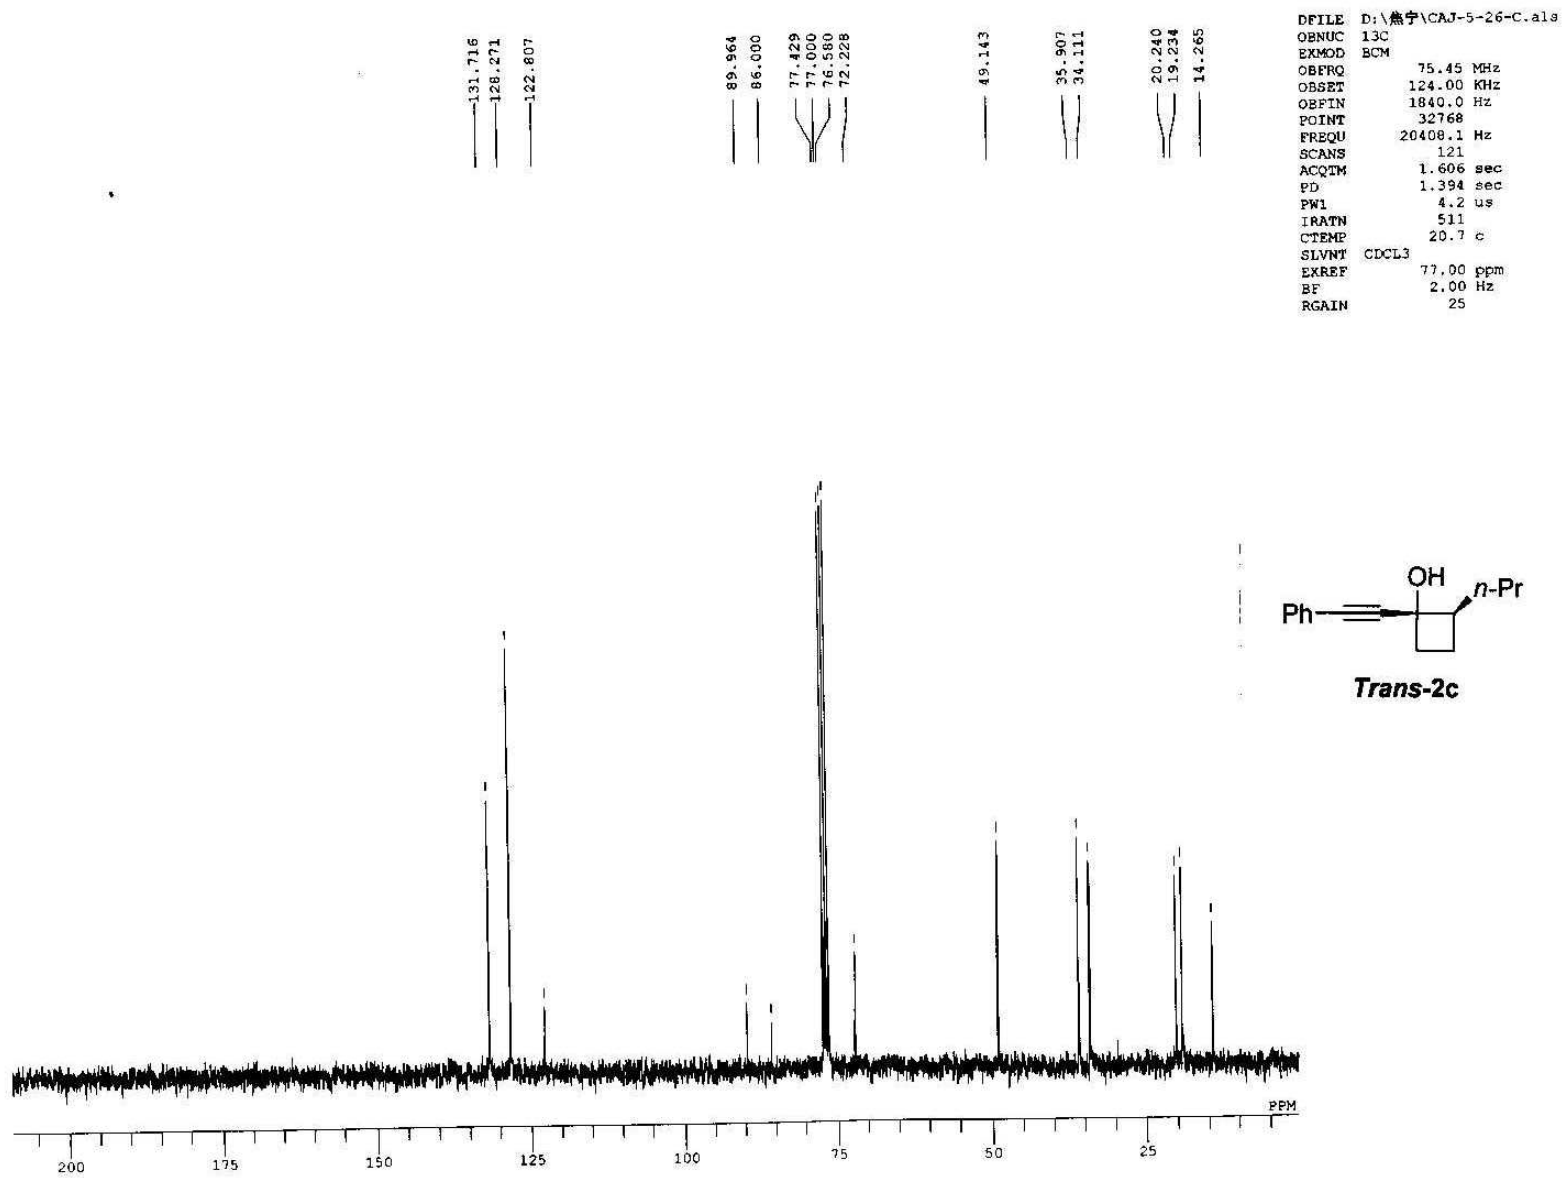

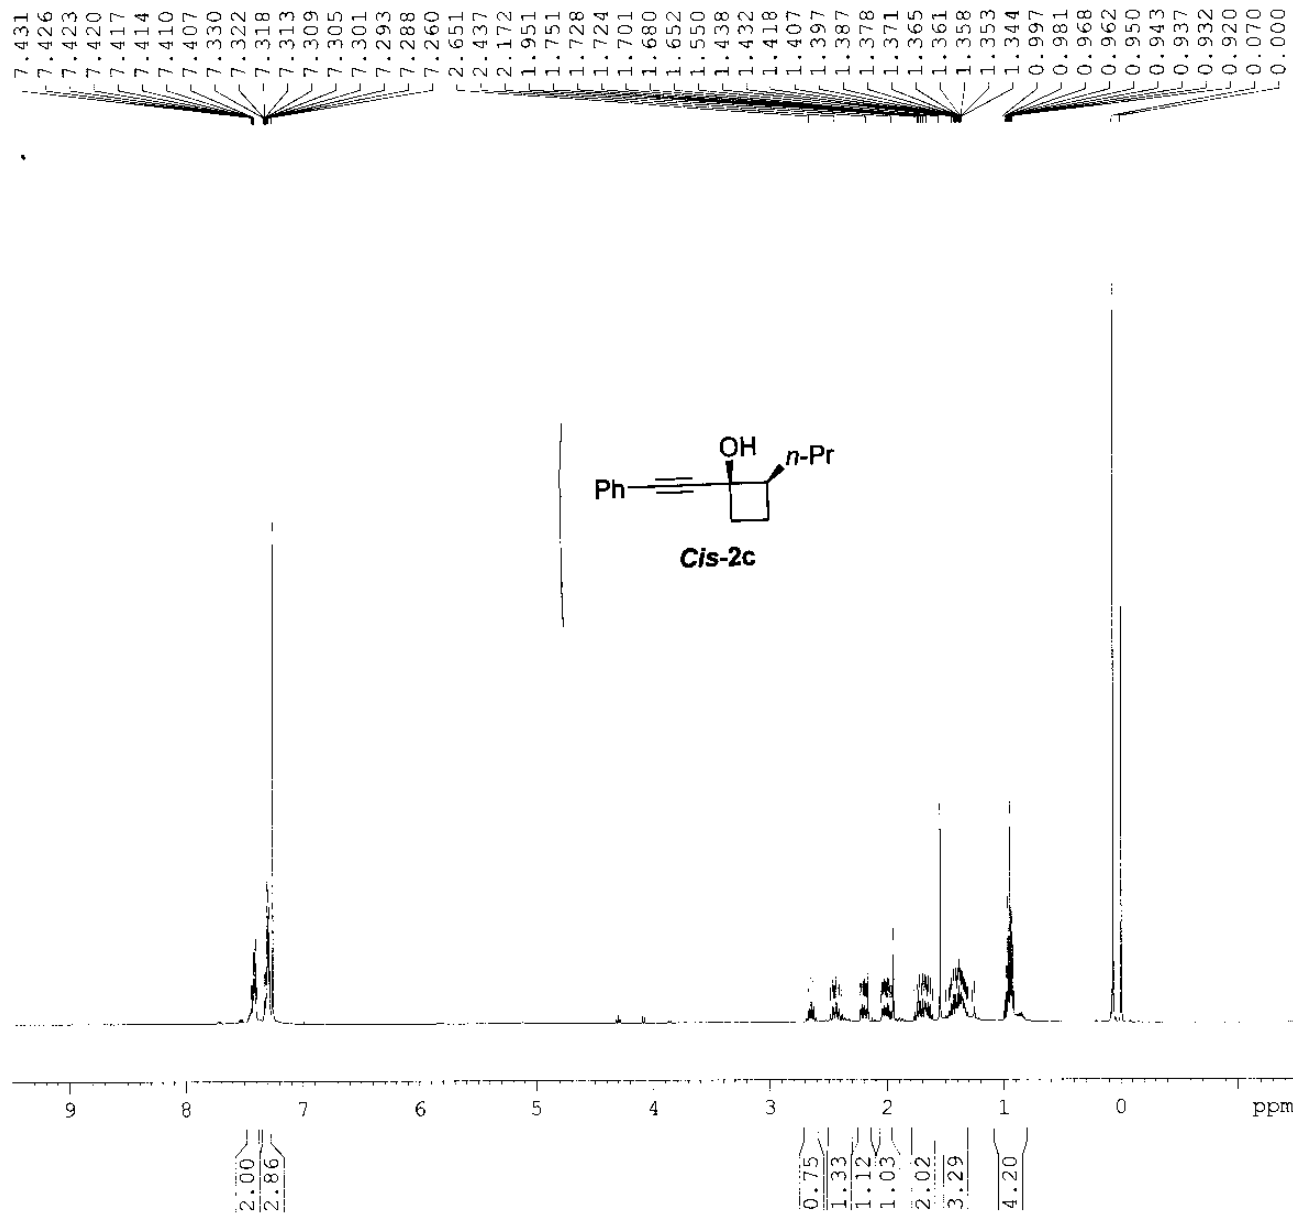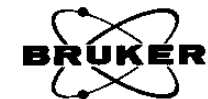

```

NAME          CAJ-6-70-1
EXPNO         1
PROCNO        1
Date_         20090428
Time          11.06
INSTRUM       spect
PROBHD        5 mm PADUL 13C
PULPROG       zg30
TD            65536
SOLVENT       CDCl3
NS            64
DS            0
SWH           8223.685 Hz
FIDRES        0.125483 Hz
AQ            3.9846387 sec
RG            362
DW            60.800 usec
DE            6.50 usec
TE            293.1 K
D1            1.00000000 sec
TD0           1
    
```

```

===== CHANNEL f1 =====
NUC1          1H
P1            14.16 usec
PL1           0.00 dB
PL1W          9.46981144 W
SFO1          400.1524711 MHz
SI            32768
SF            400.1500037 MHz
WDW           EM
SSB           0
LB            0.30 Hz
GB            0
PC            1.00
    
```

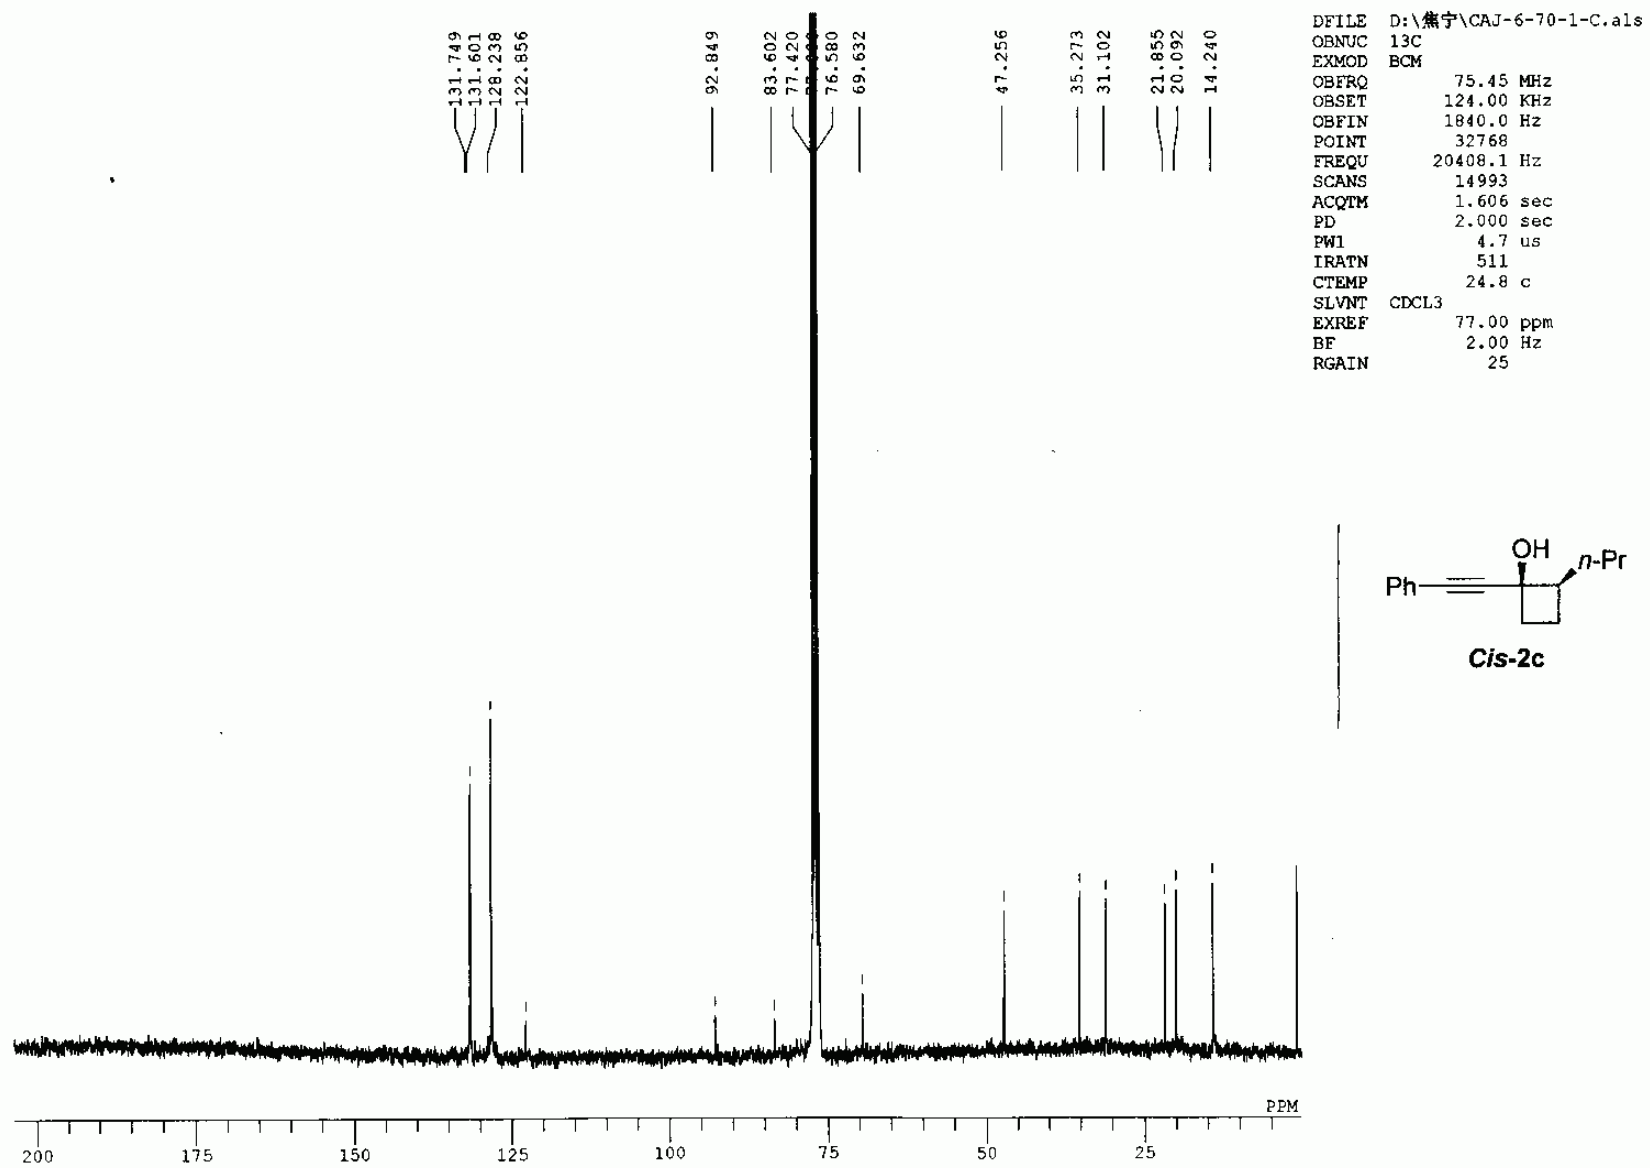

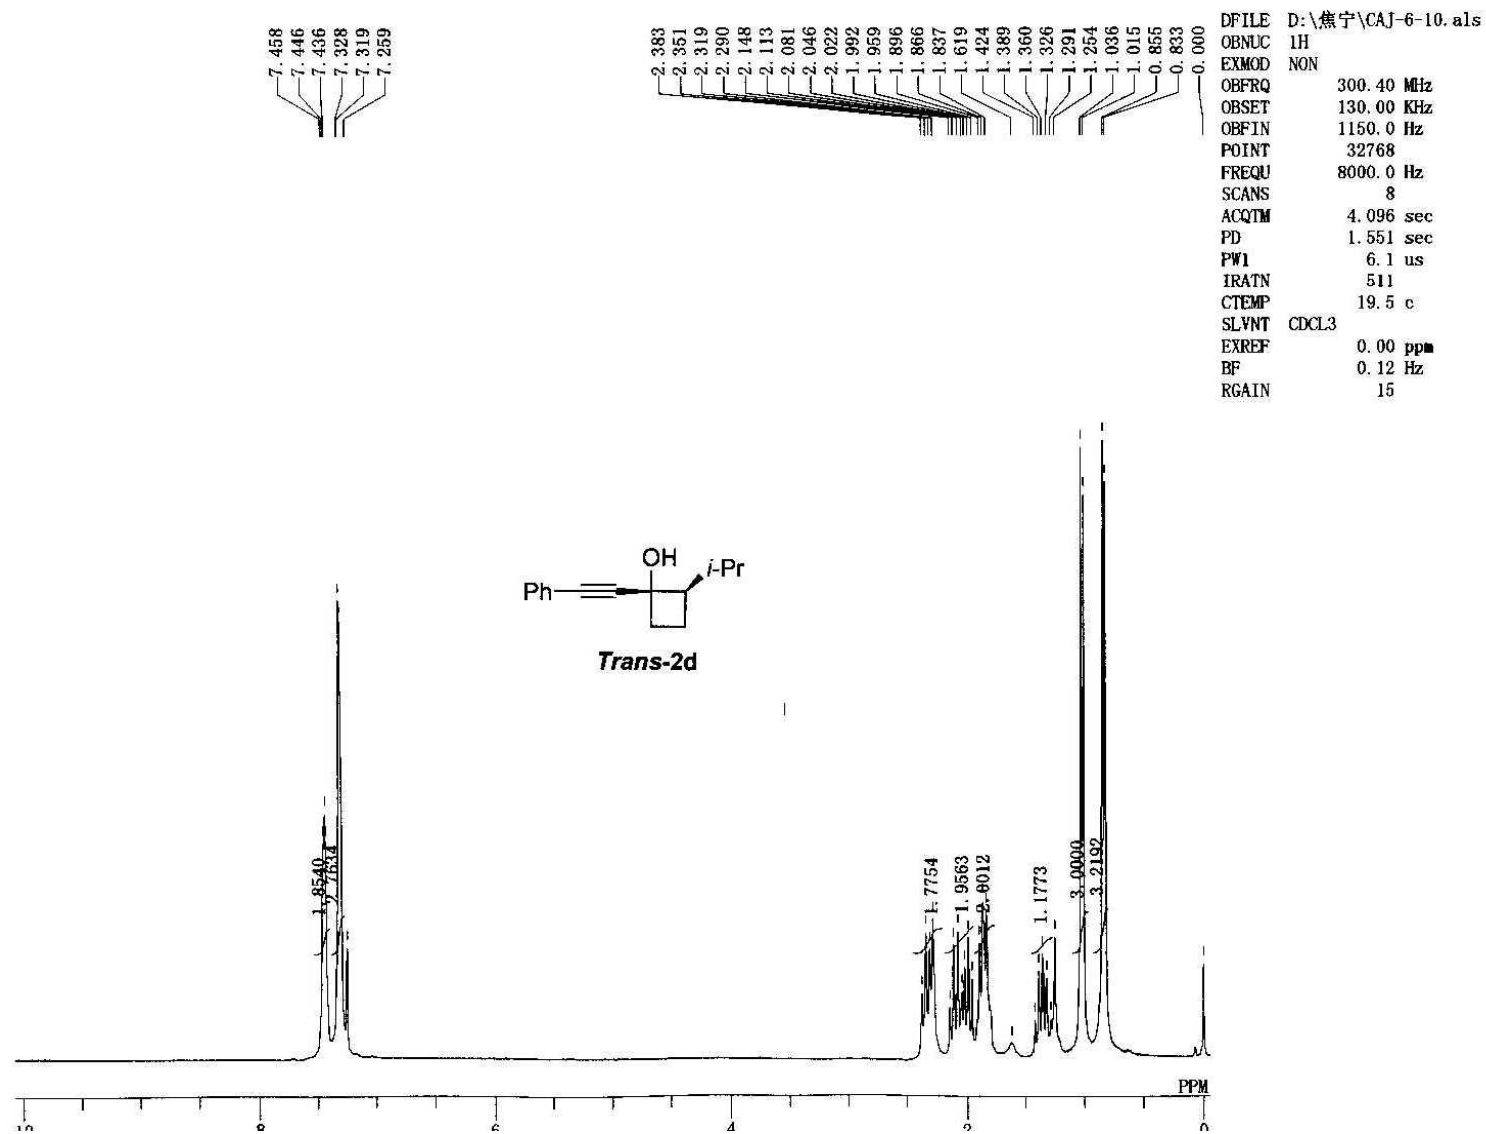

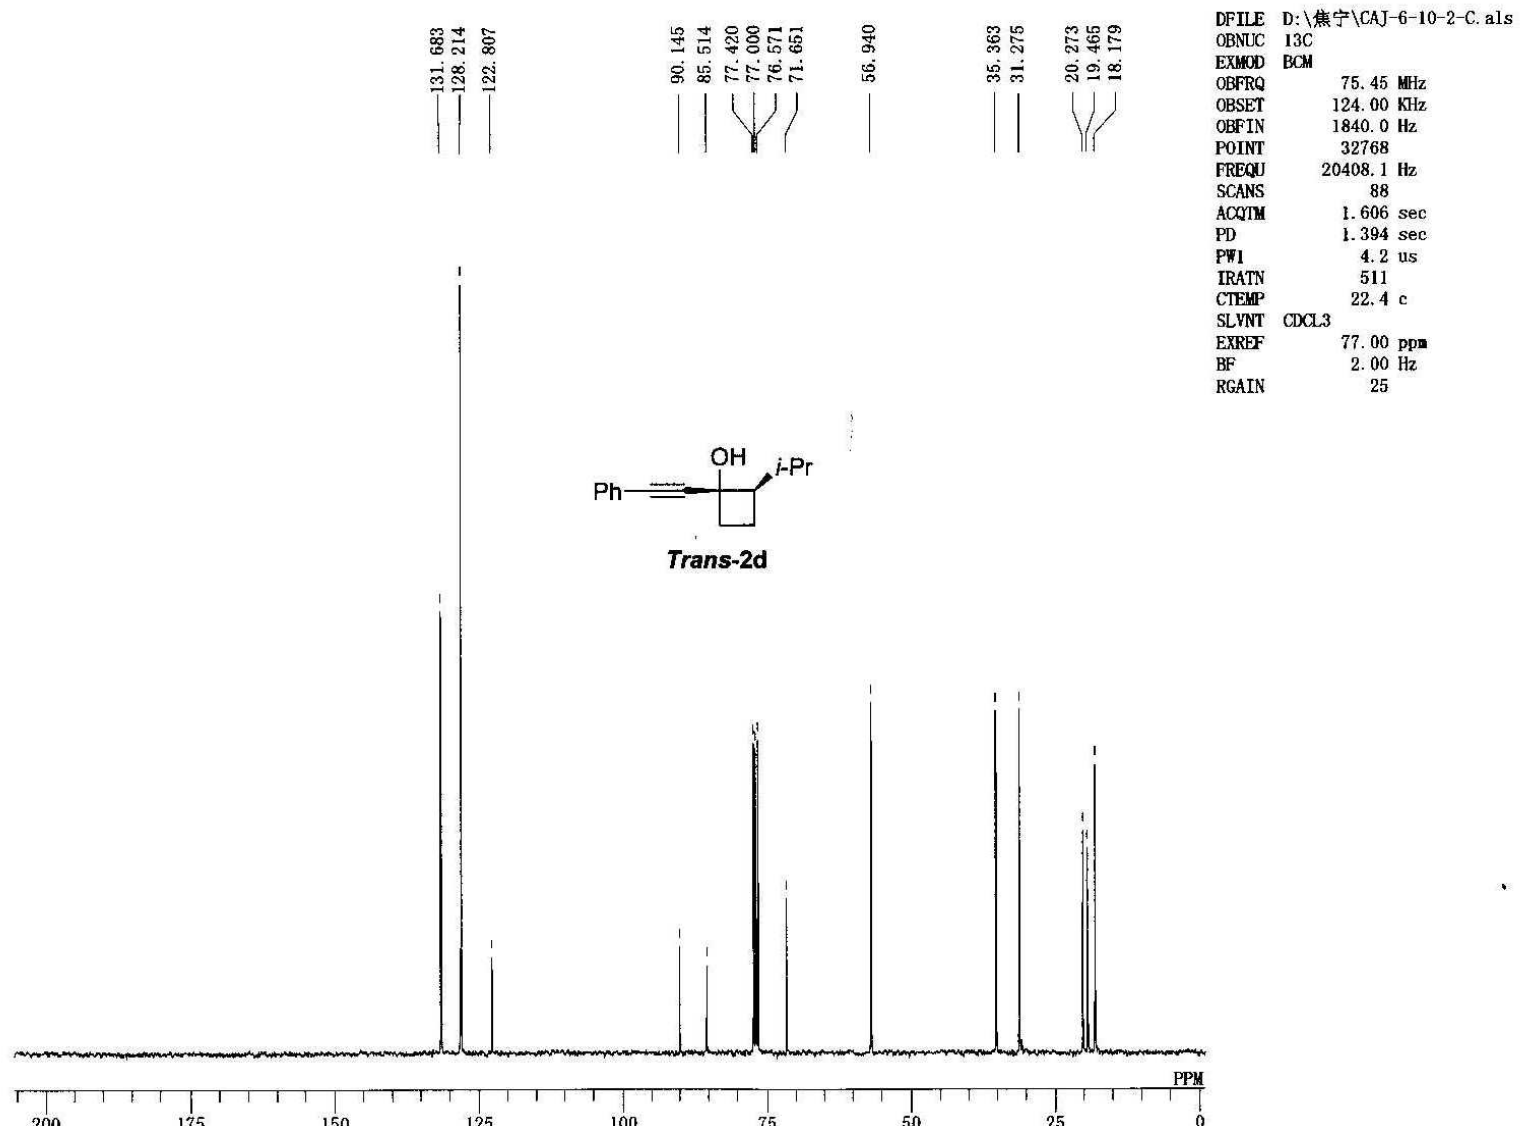

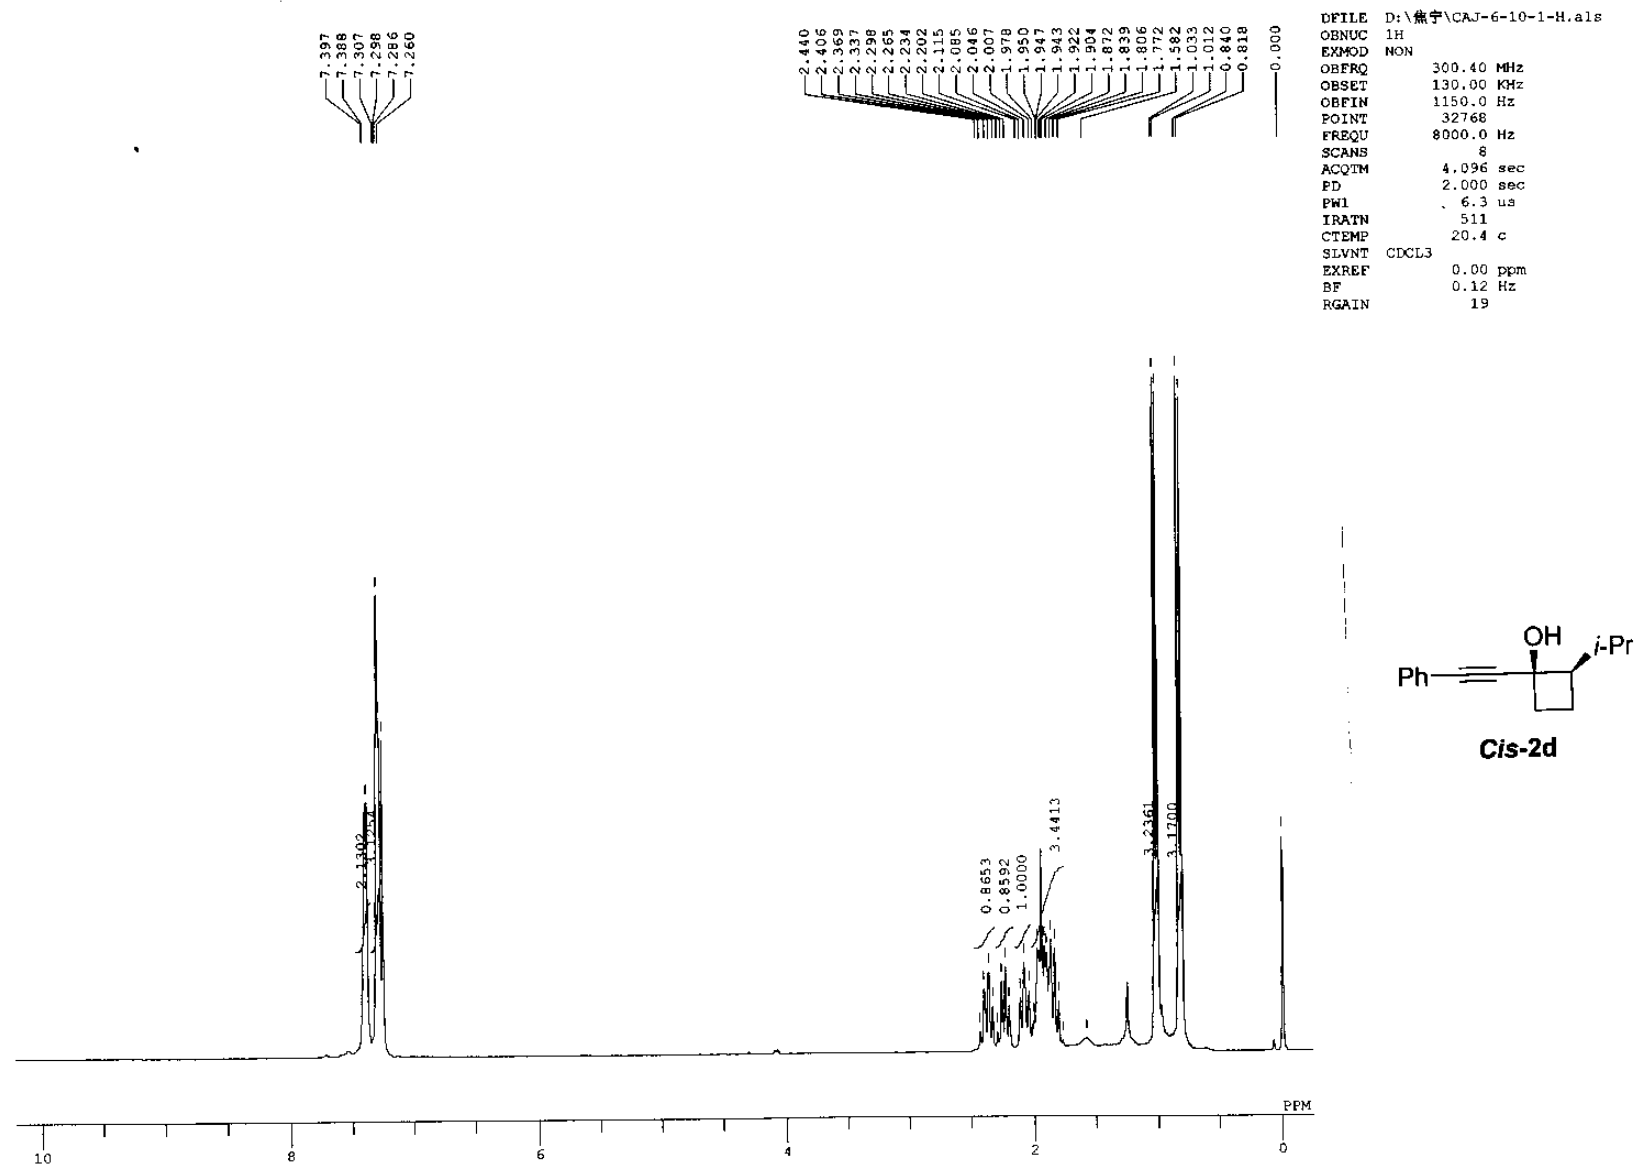

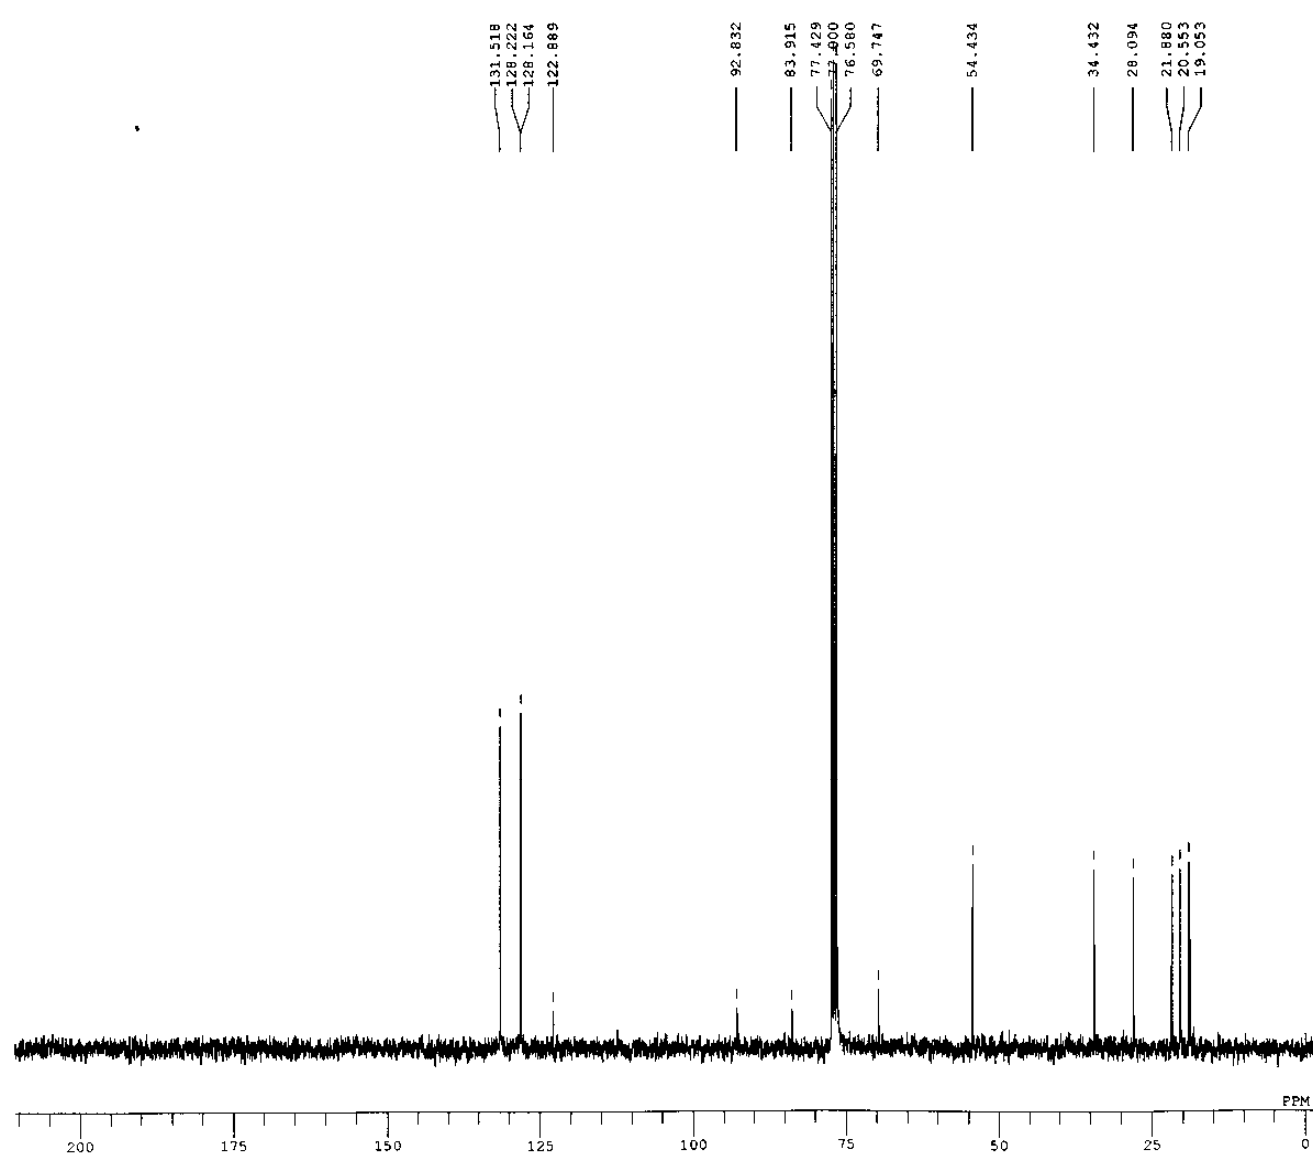

DFILE D:\燕宁\CAJ-6-10-1-C.als  
QENUC 13C  
EXMOD BCM  
OBFRQ 75.45 MHz  
OBSEF 124.00 KHz  
OBFIN 1840.0 Hz  
POINT 32768  
FREQU 20408.1 Hz  
SCANS 464  
ACQTM 1.606 sec  
PD 2.000 sec  
PW1 4.7 us  
IRATN 511  
CTEMP 20.5 c  
SLVNT CDCL3  
EXREF 77.00 ppm  
BF 2.00 Hz  
RGAIN 24

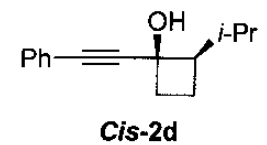

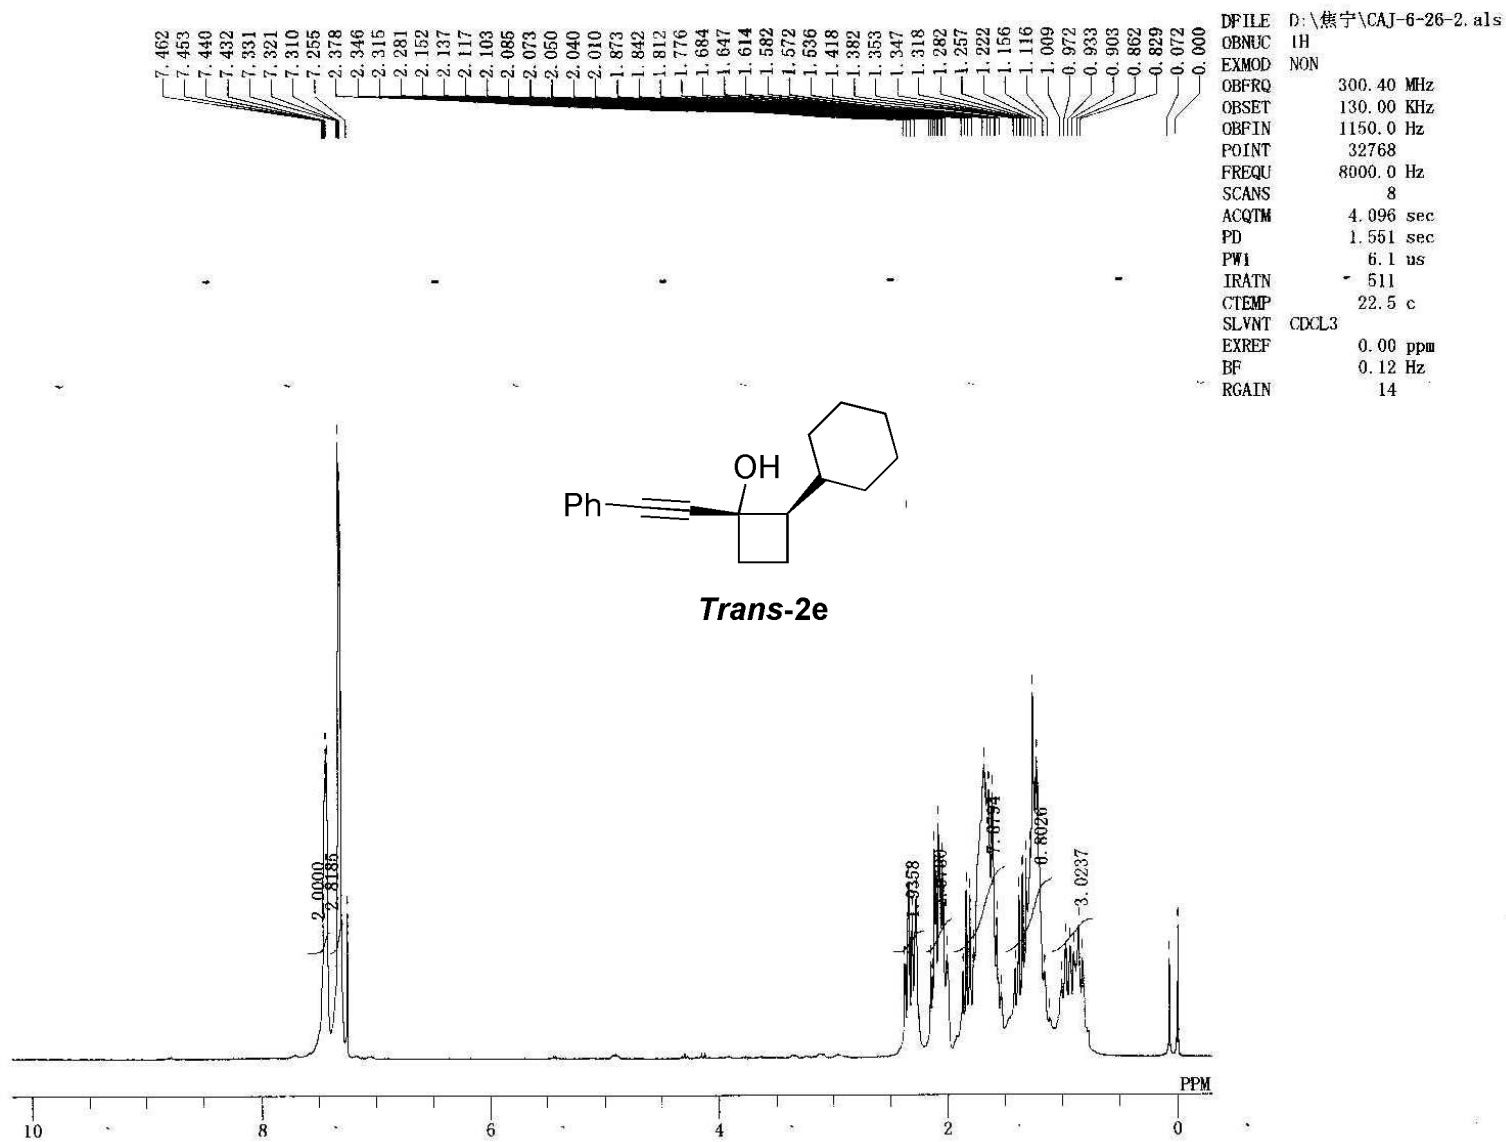



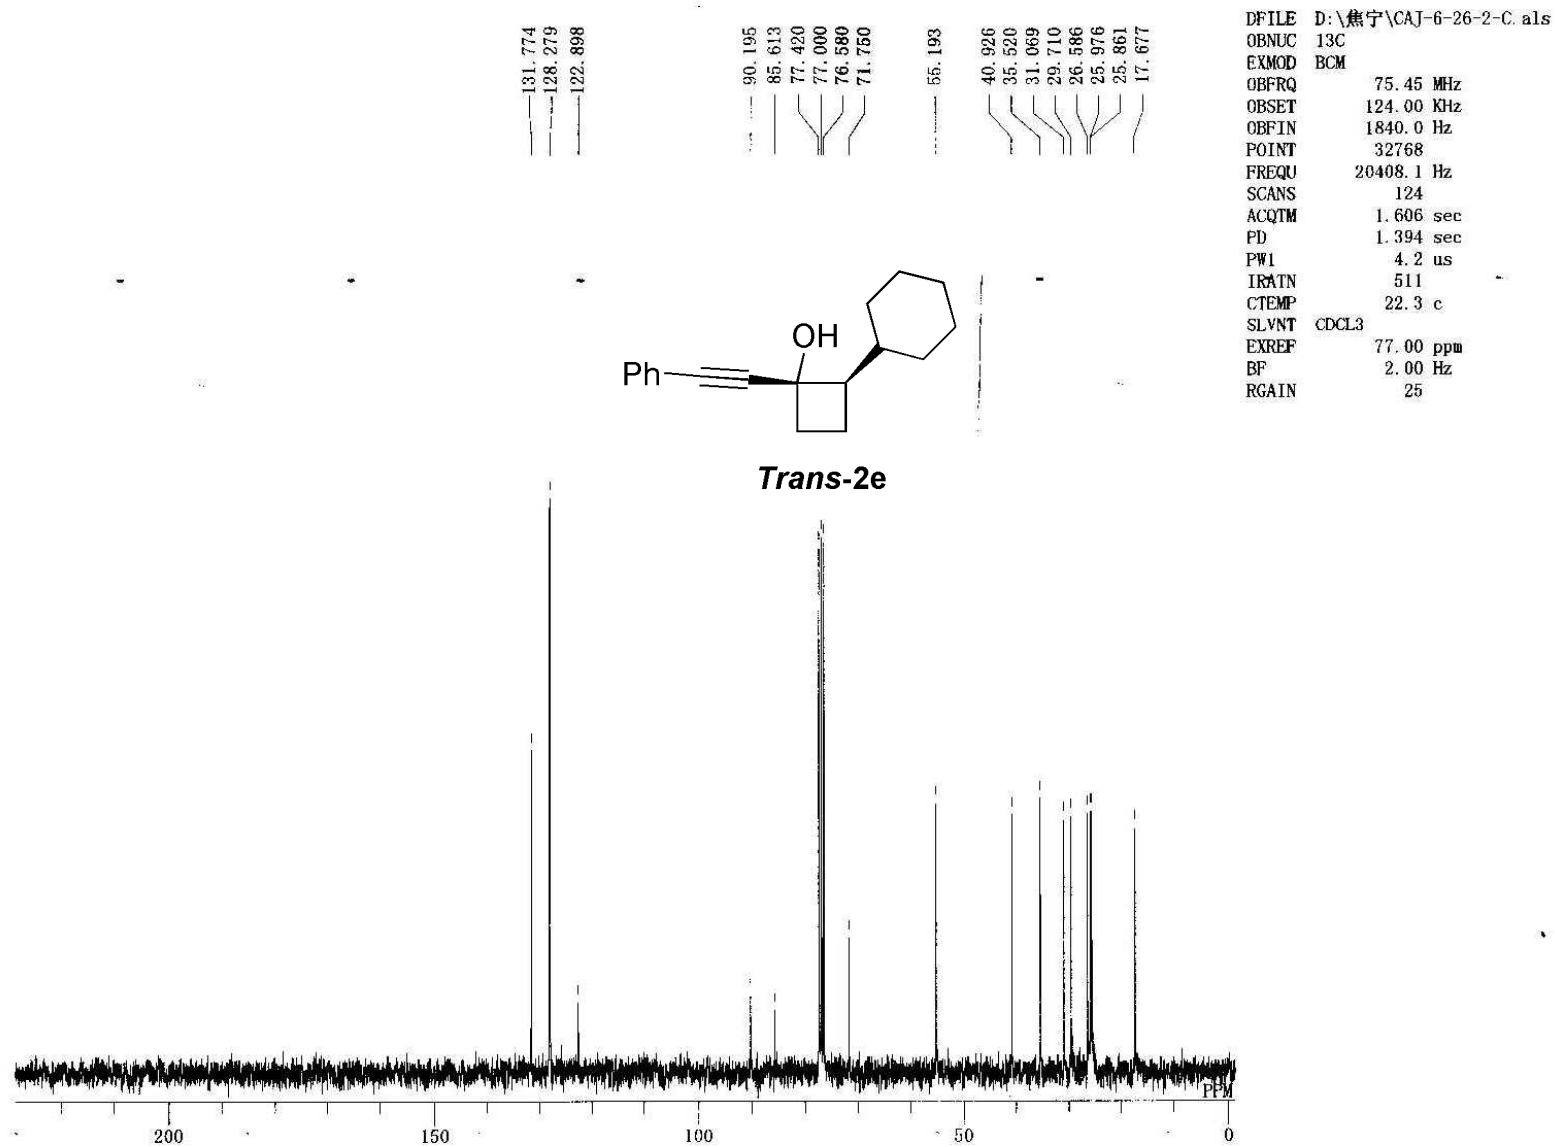

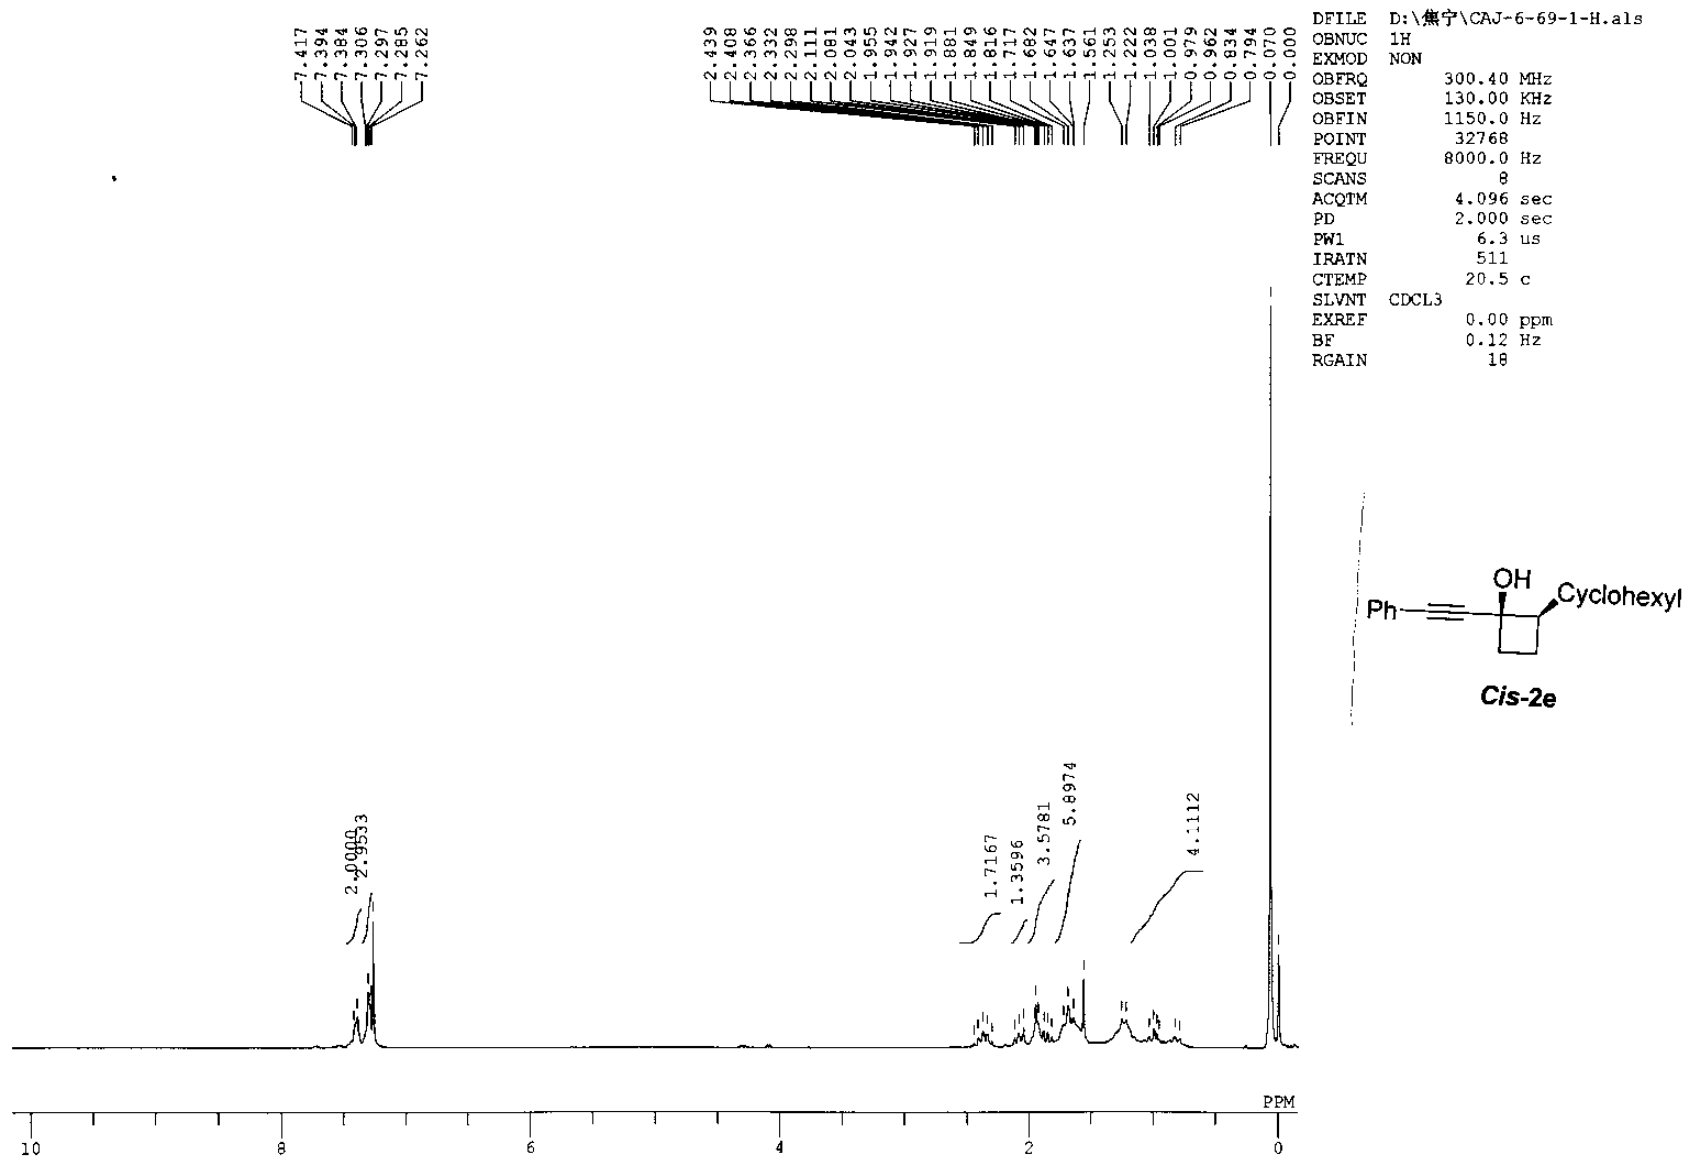

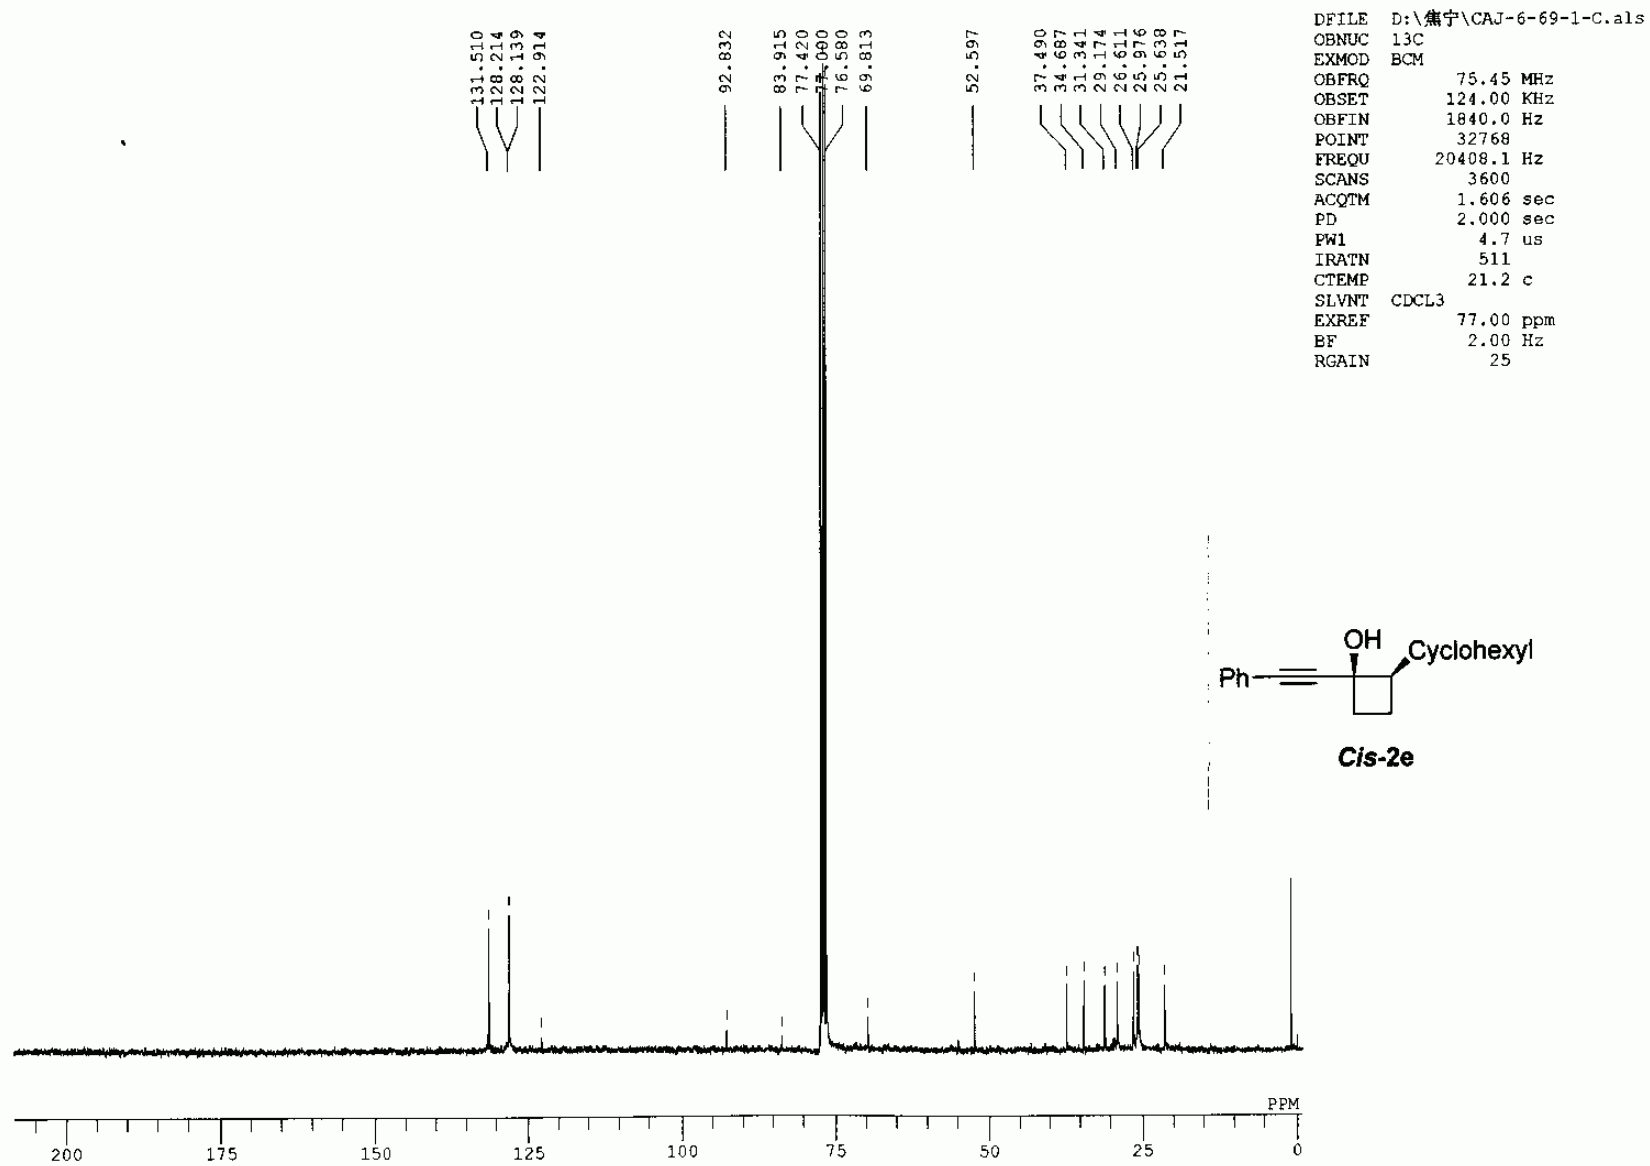

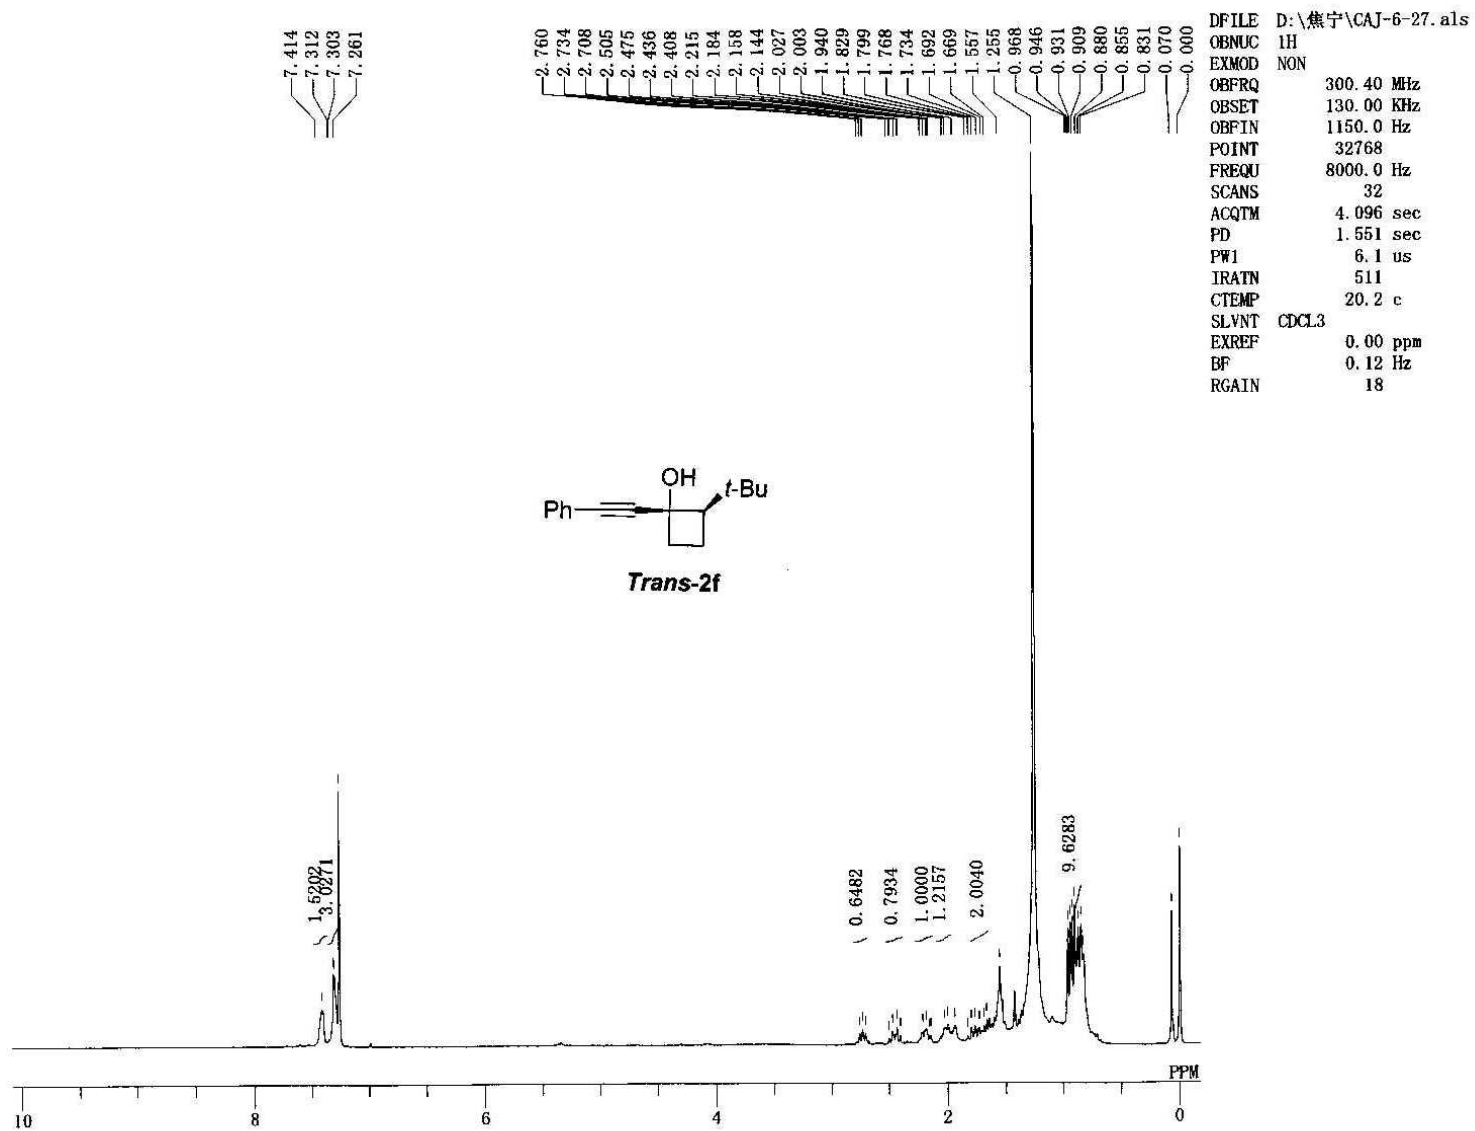

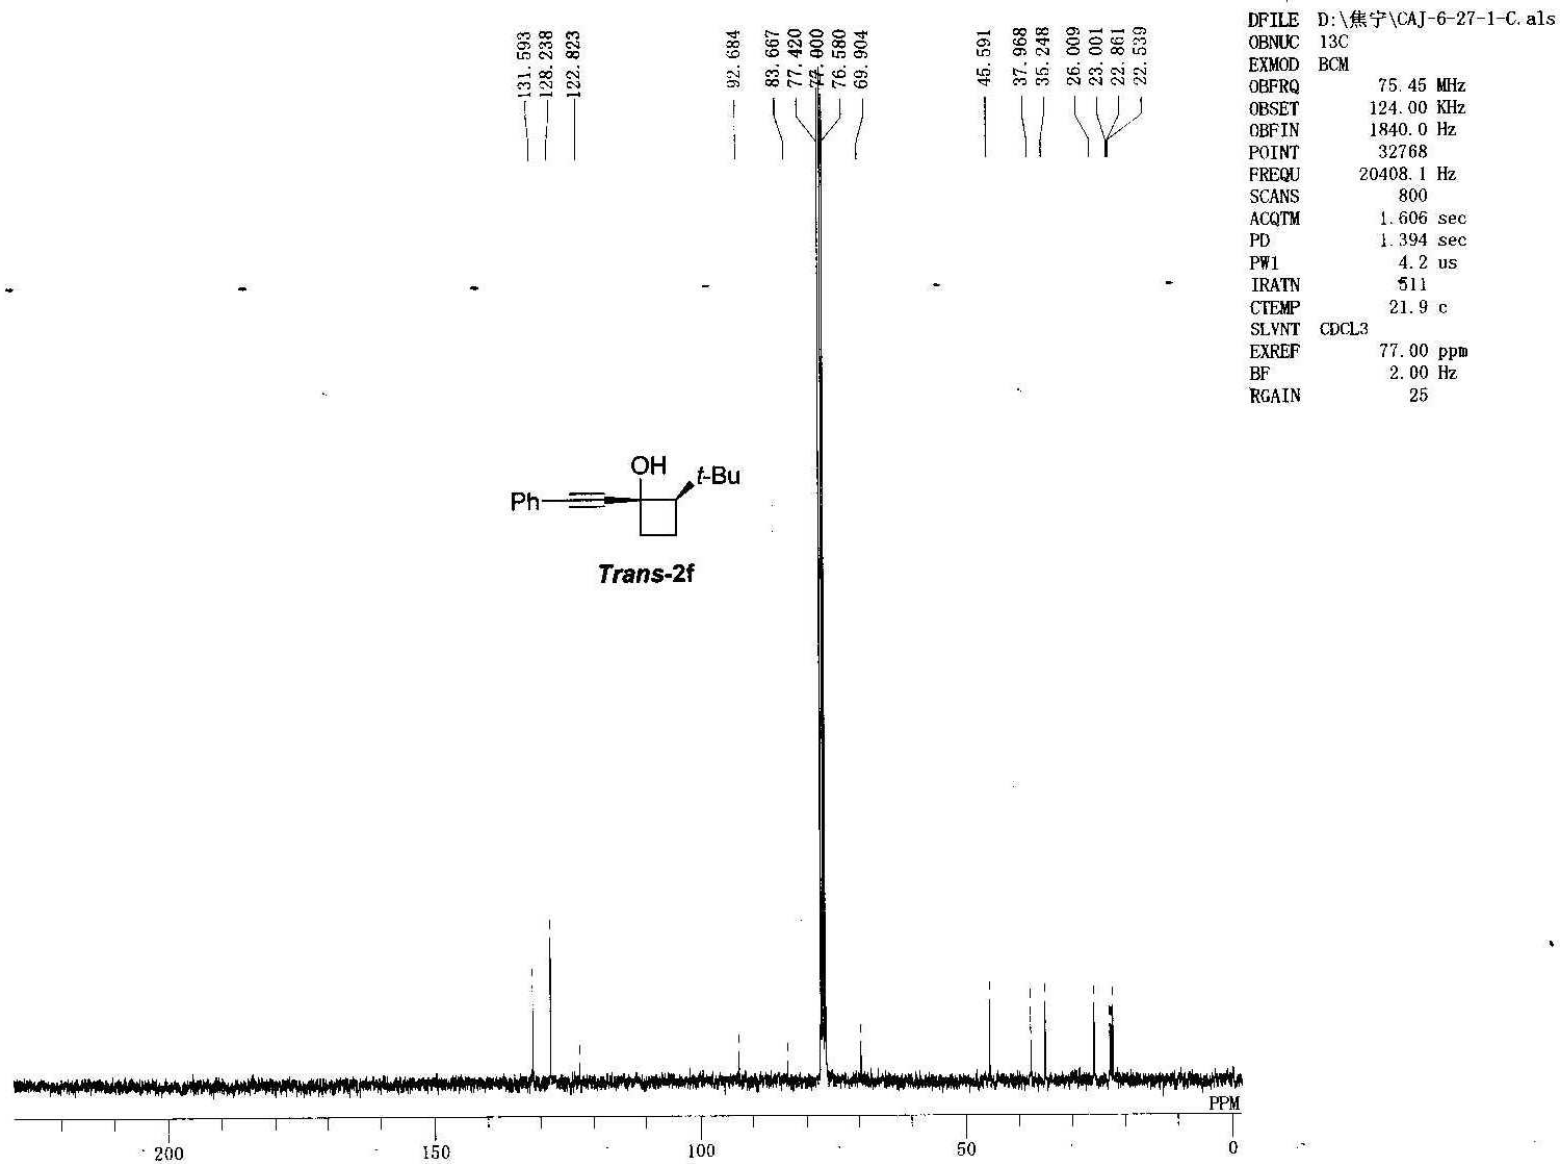

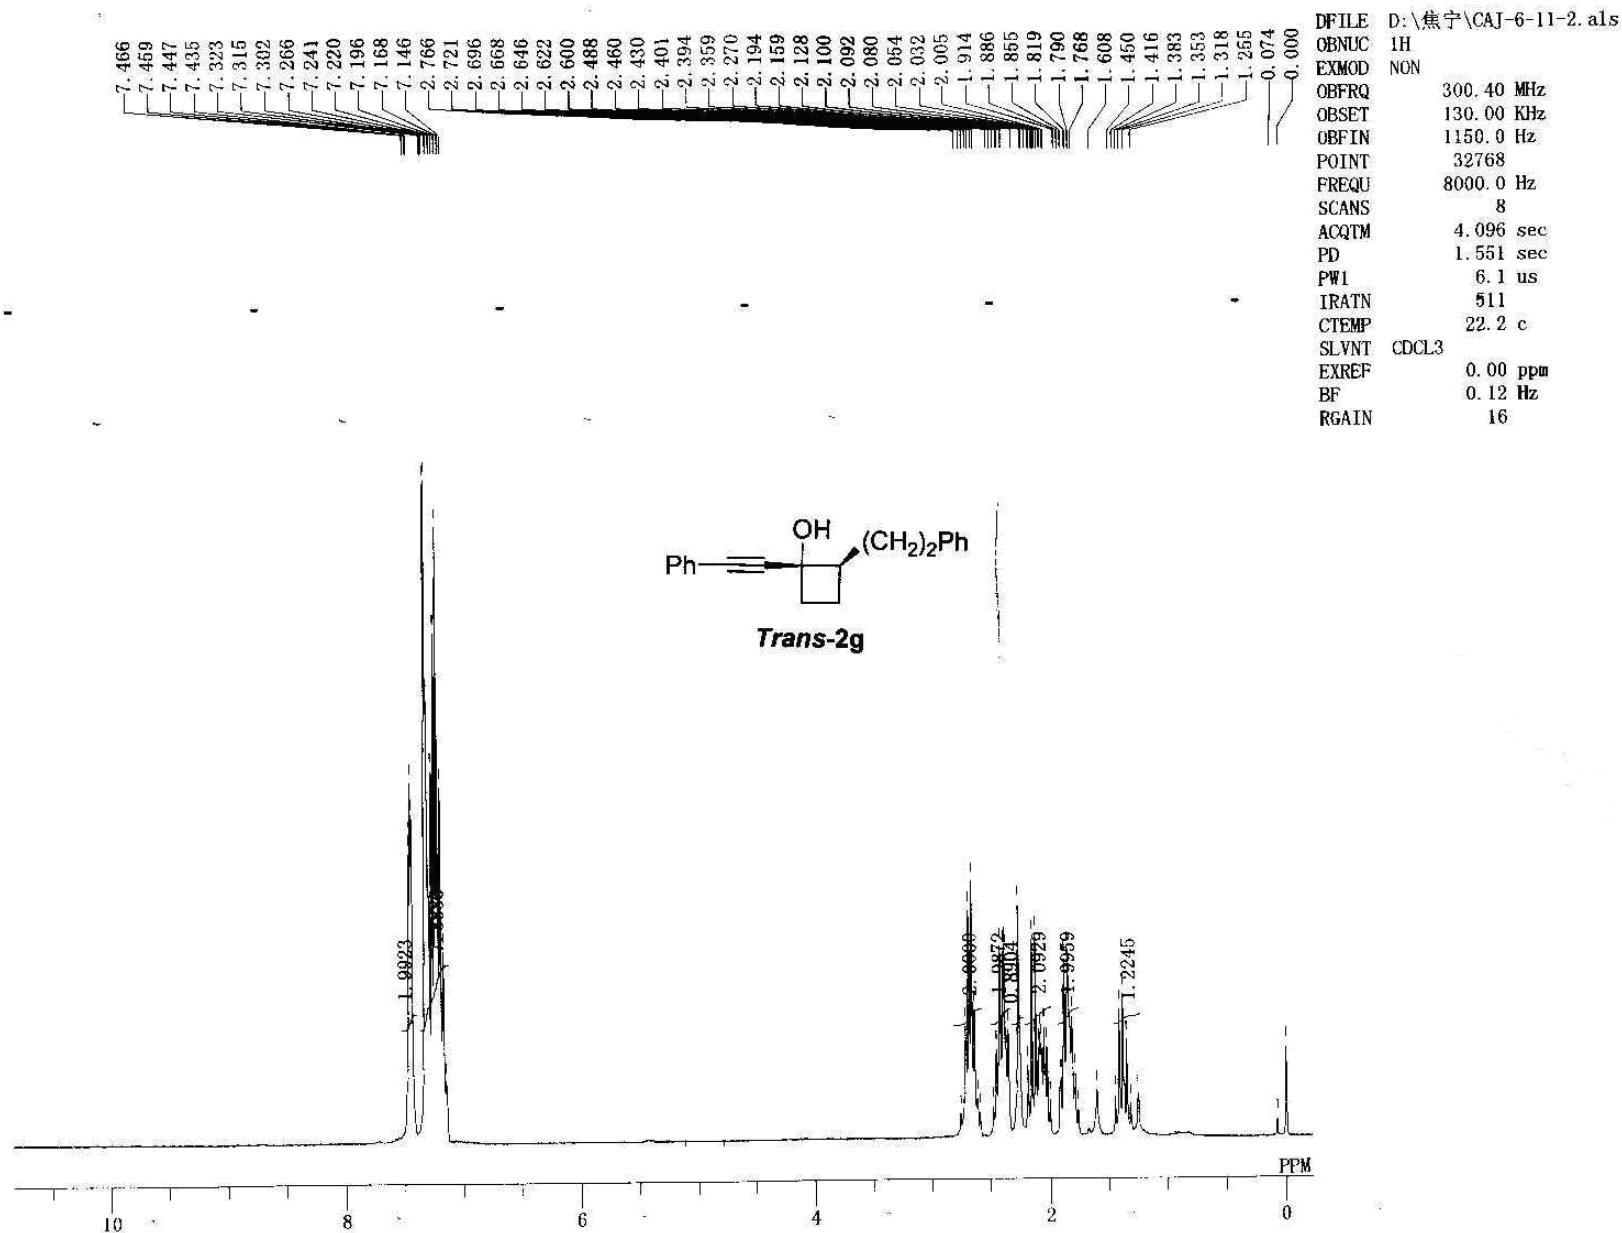

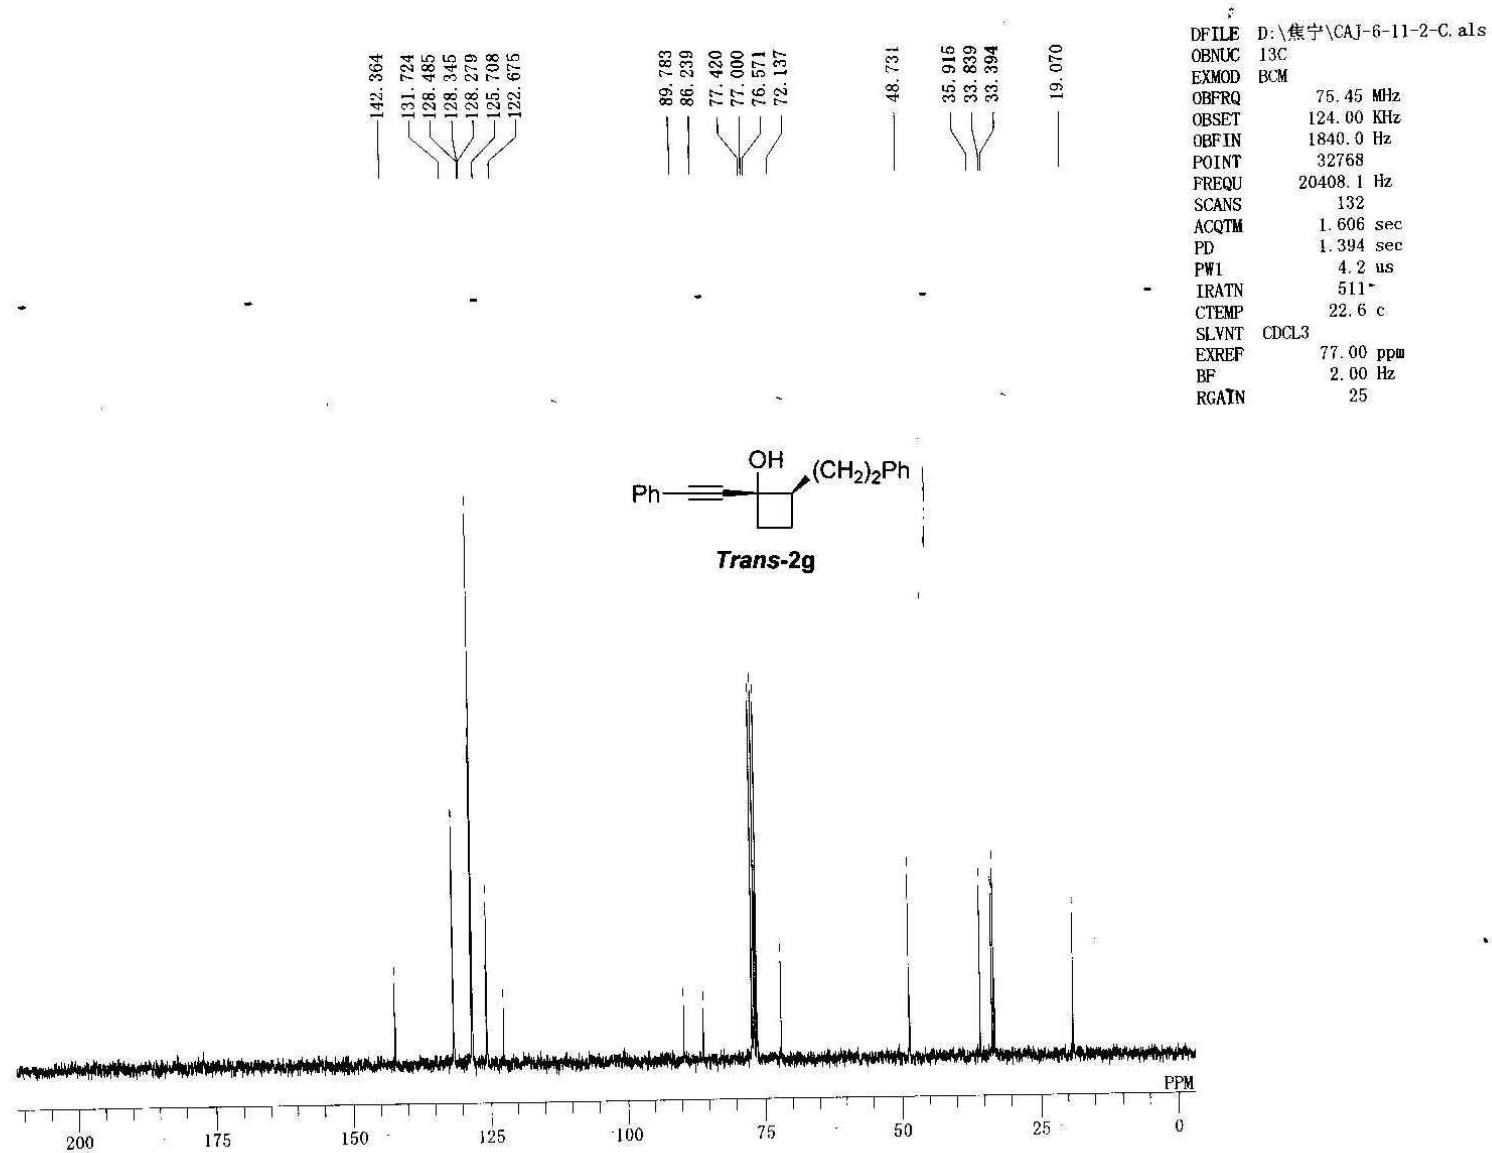

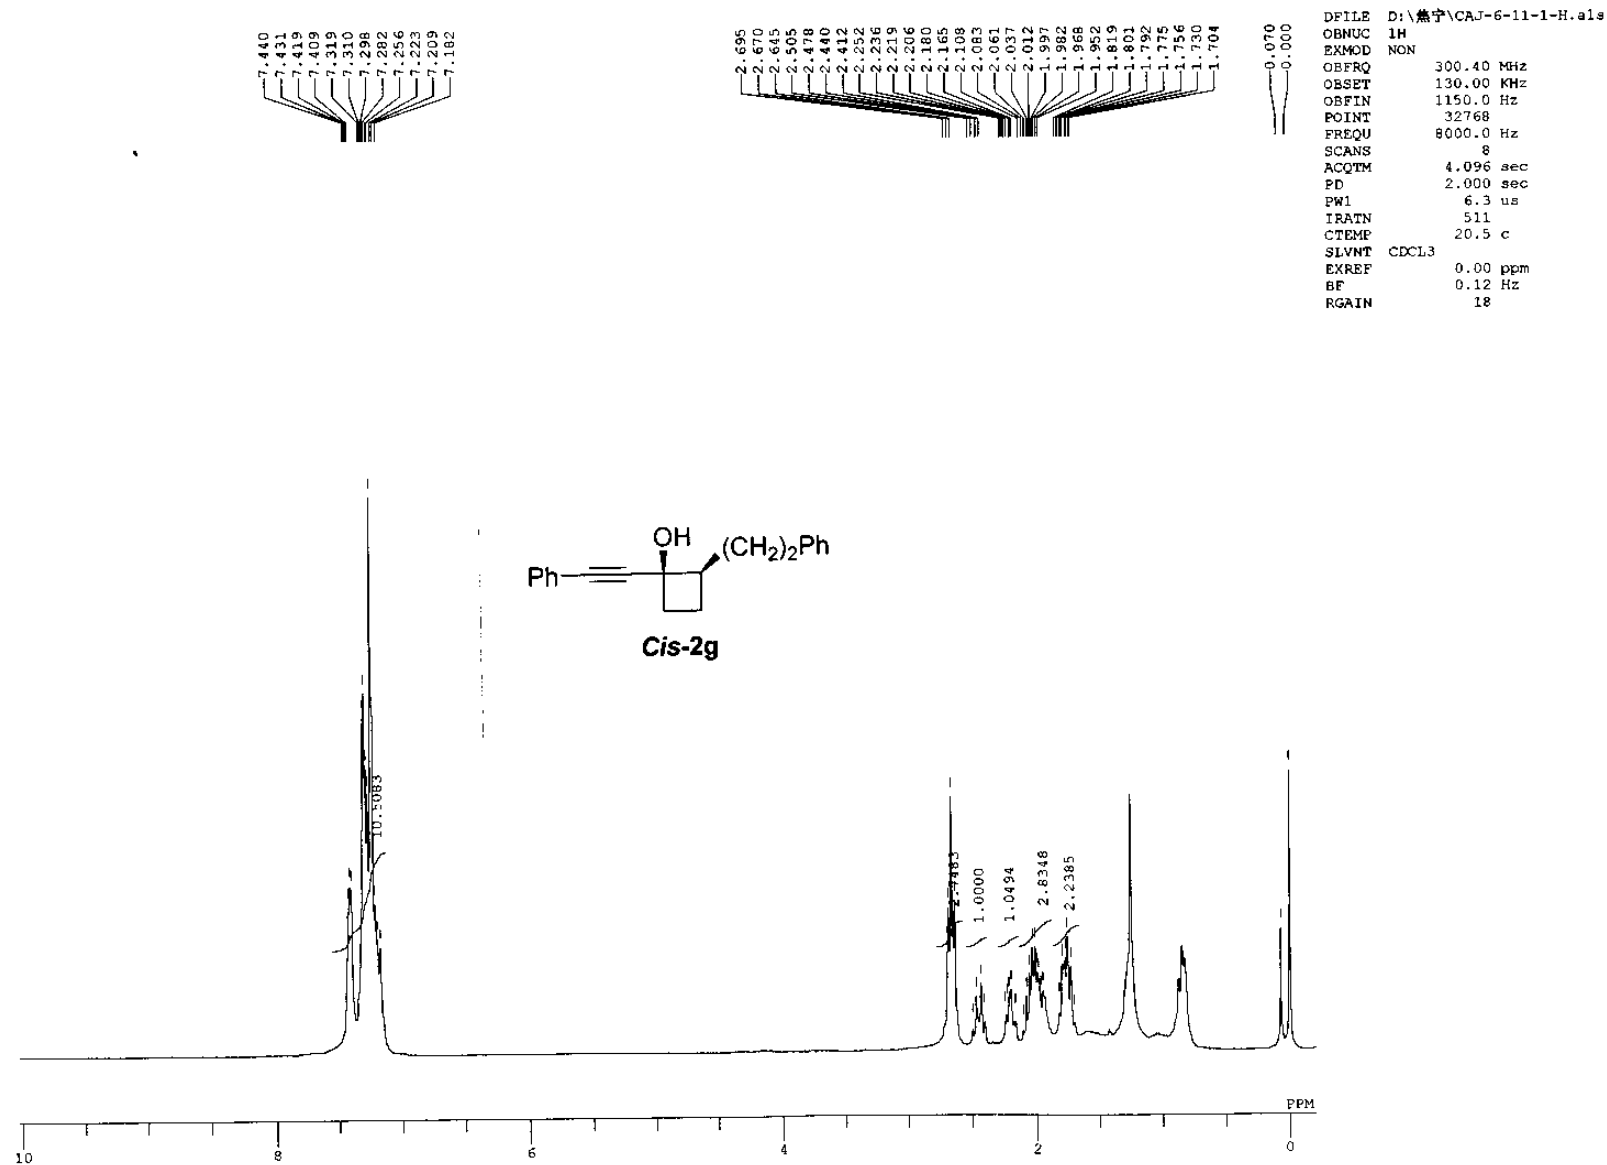



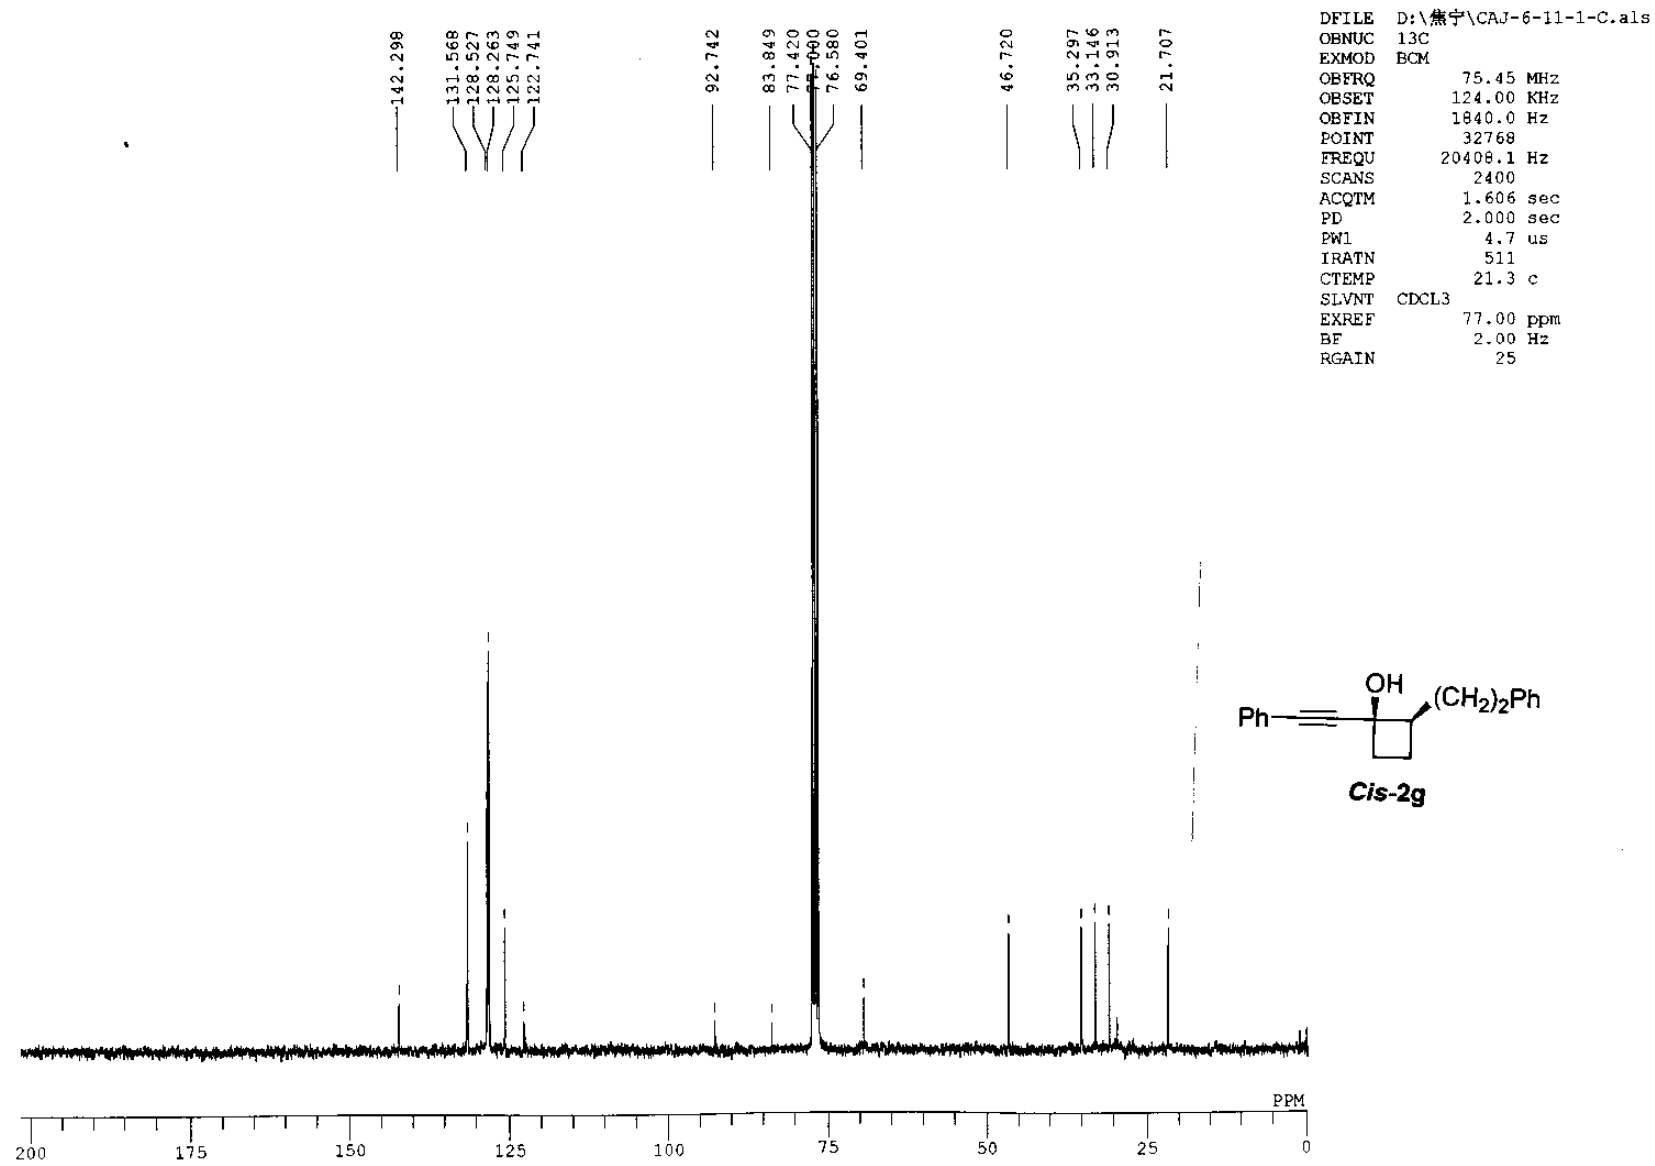

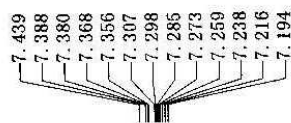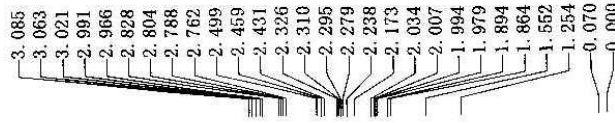

D:\焦宇\CAJ-5-85-11. als  
DFILE  
OBNUC 1H  
EXMOD NON  
OBFRQ 300.40 MHz  
OBSET 130.00 KHz  
OBFIN 1150.0 Hz  
POINT 32768  
FREQU 8000.0 Hz  
SCANS 8  
ACQTM 4.096 sec  
PD 1.551 sec  
PW1 6.1 us  
IRATN 511  
CTEMP 21.9 c  
SLVNT CDCL3  
EXREF 0.00 ppm  
BF 0.12 Hz  
RGAIN 23

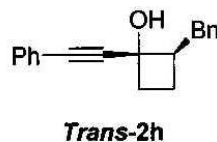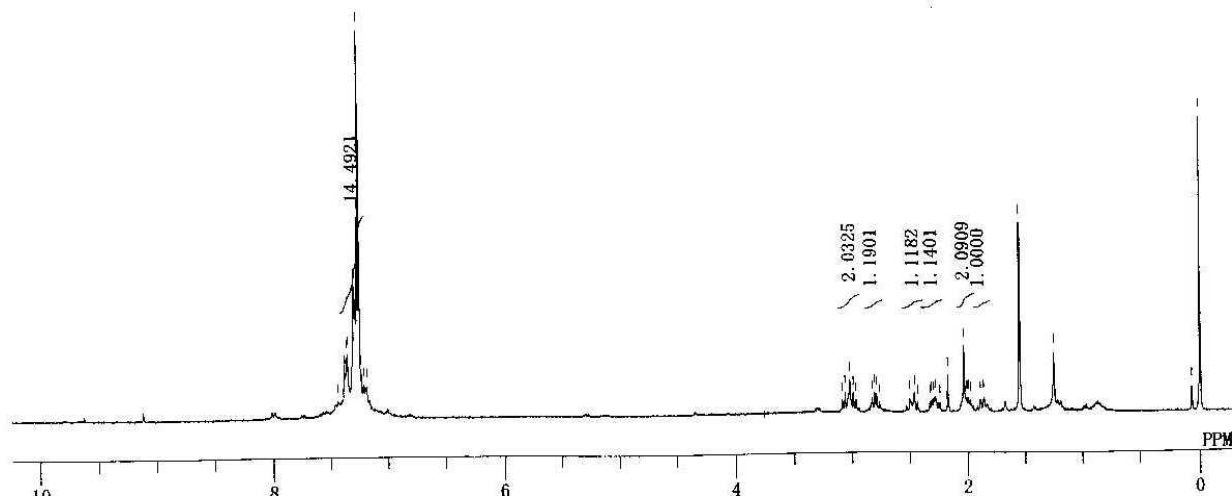

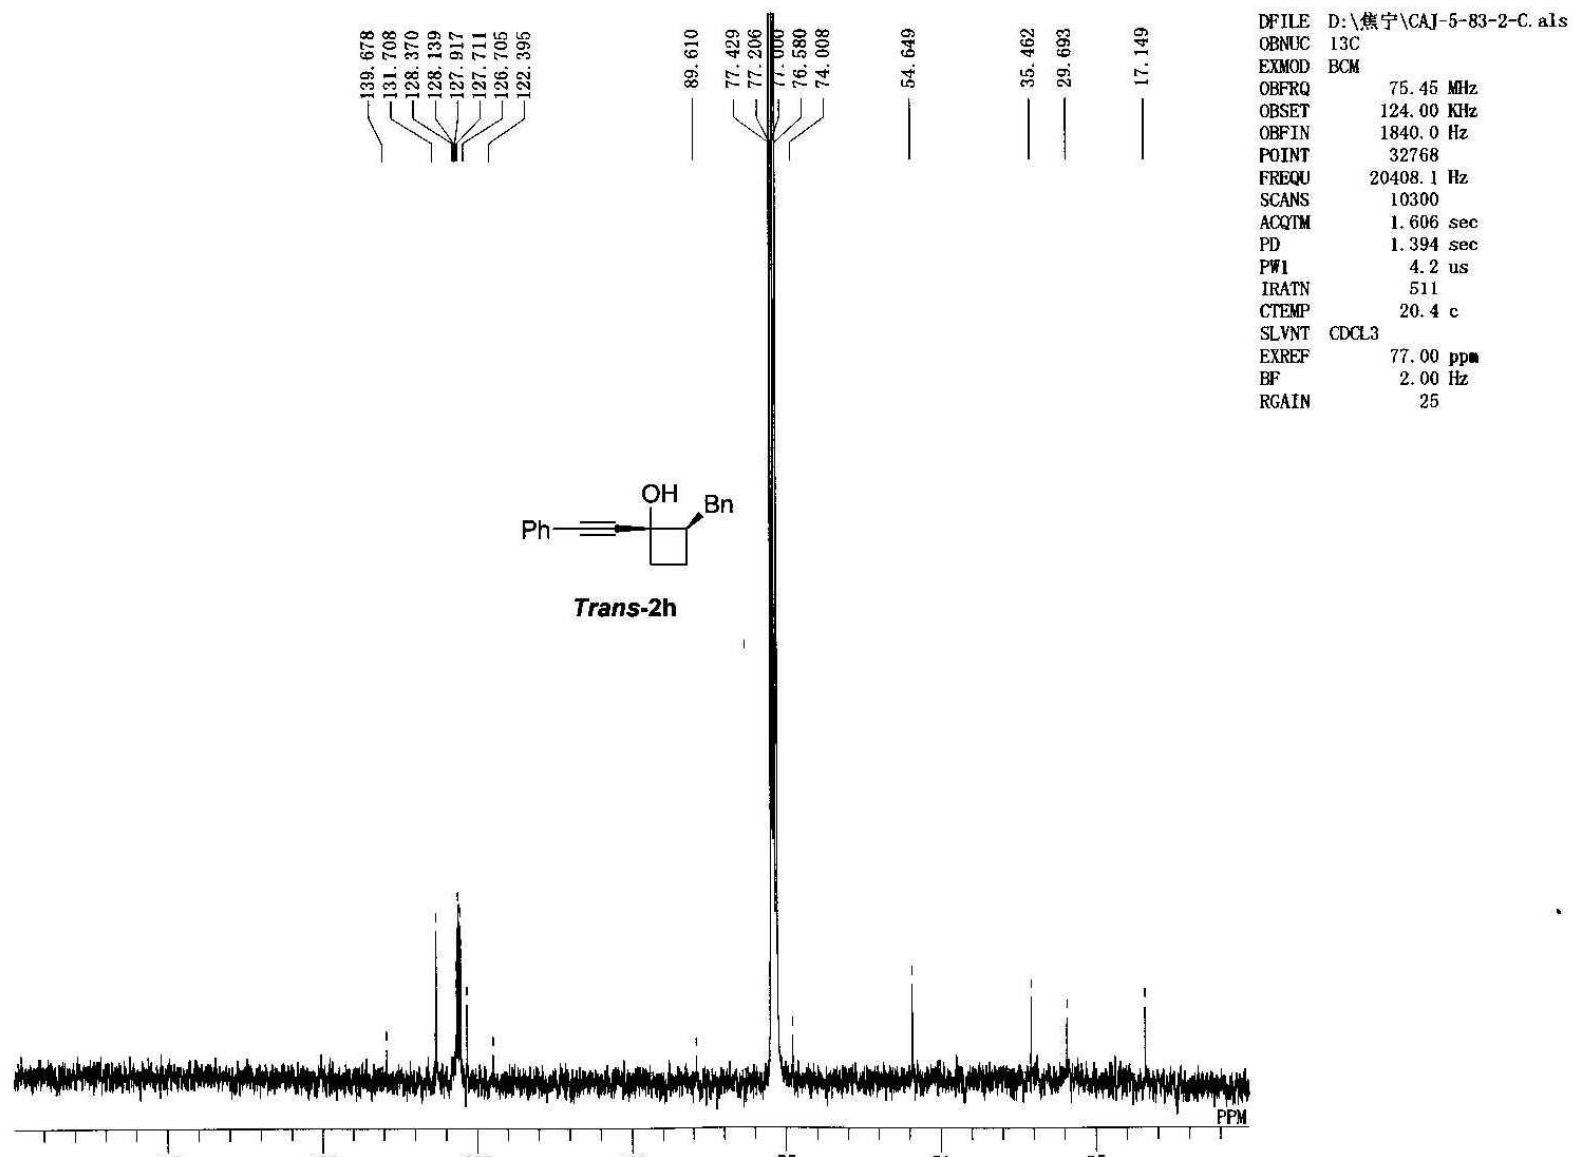

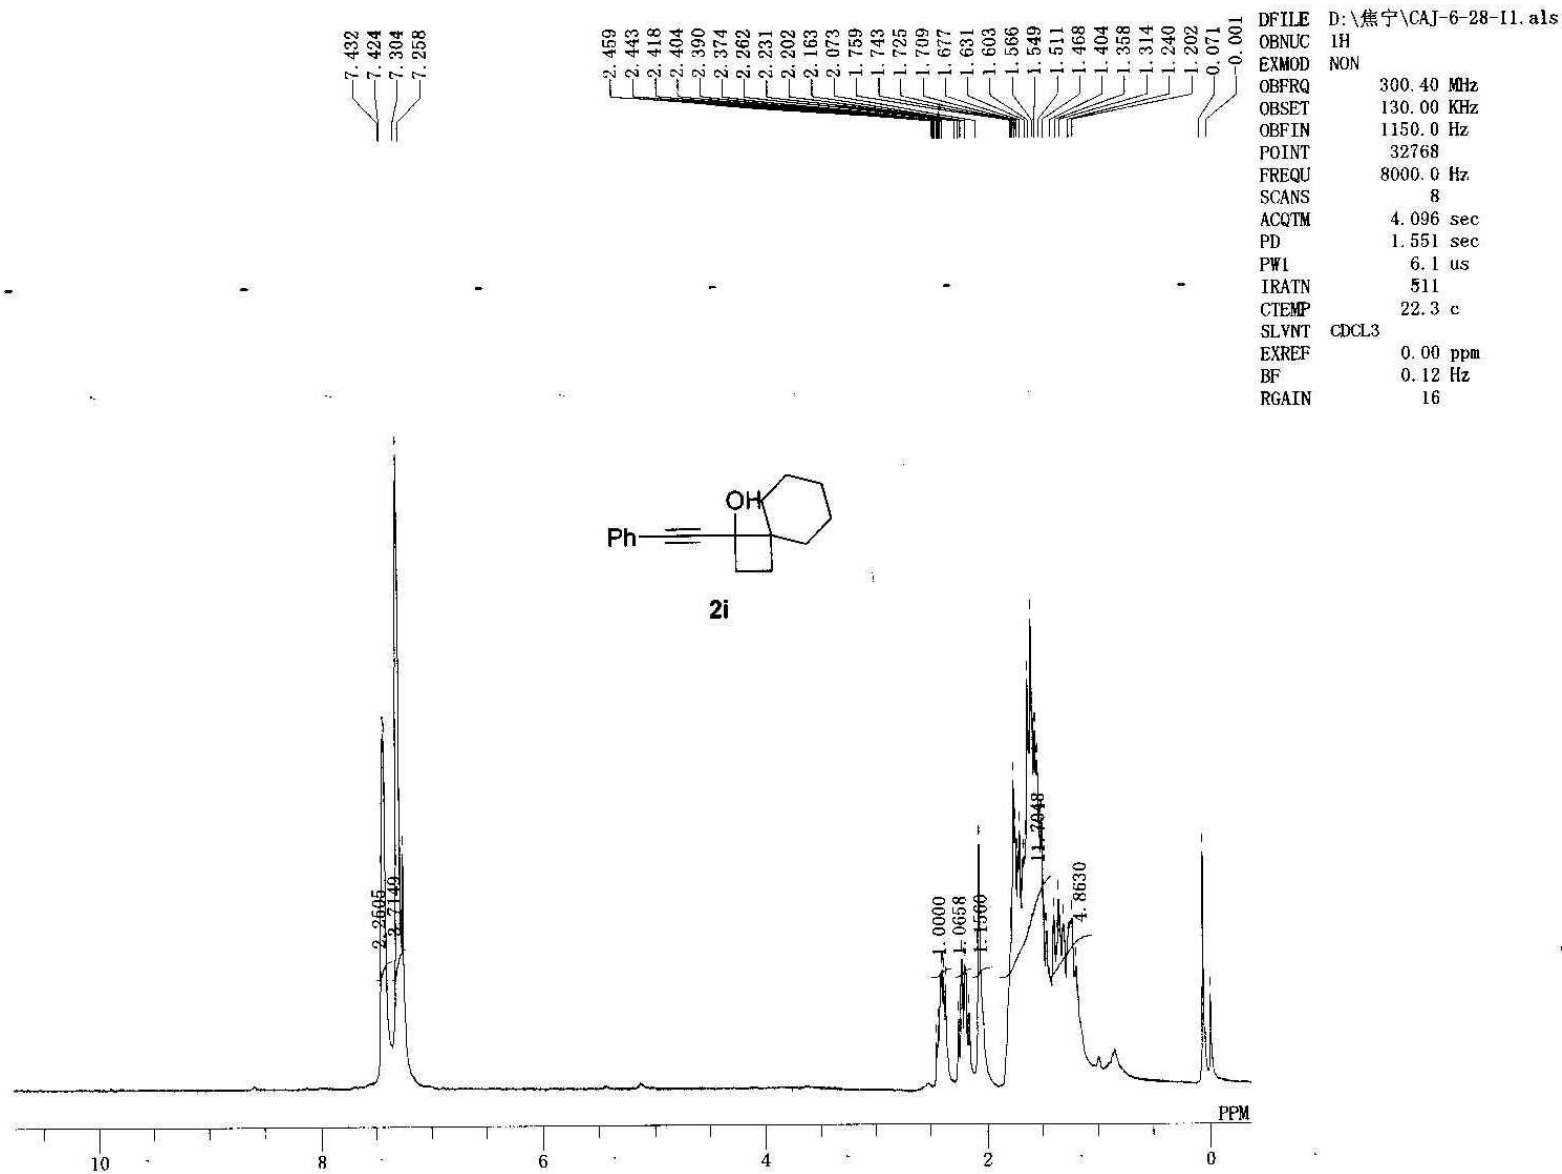

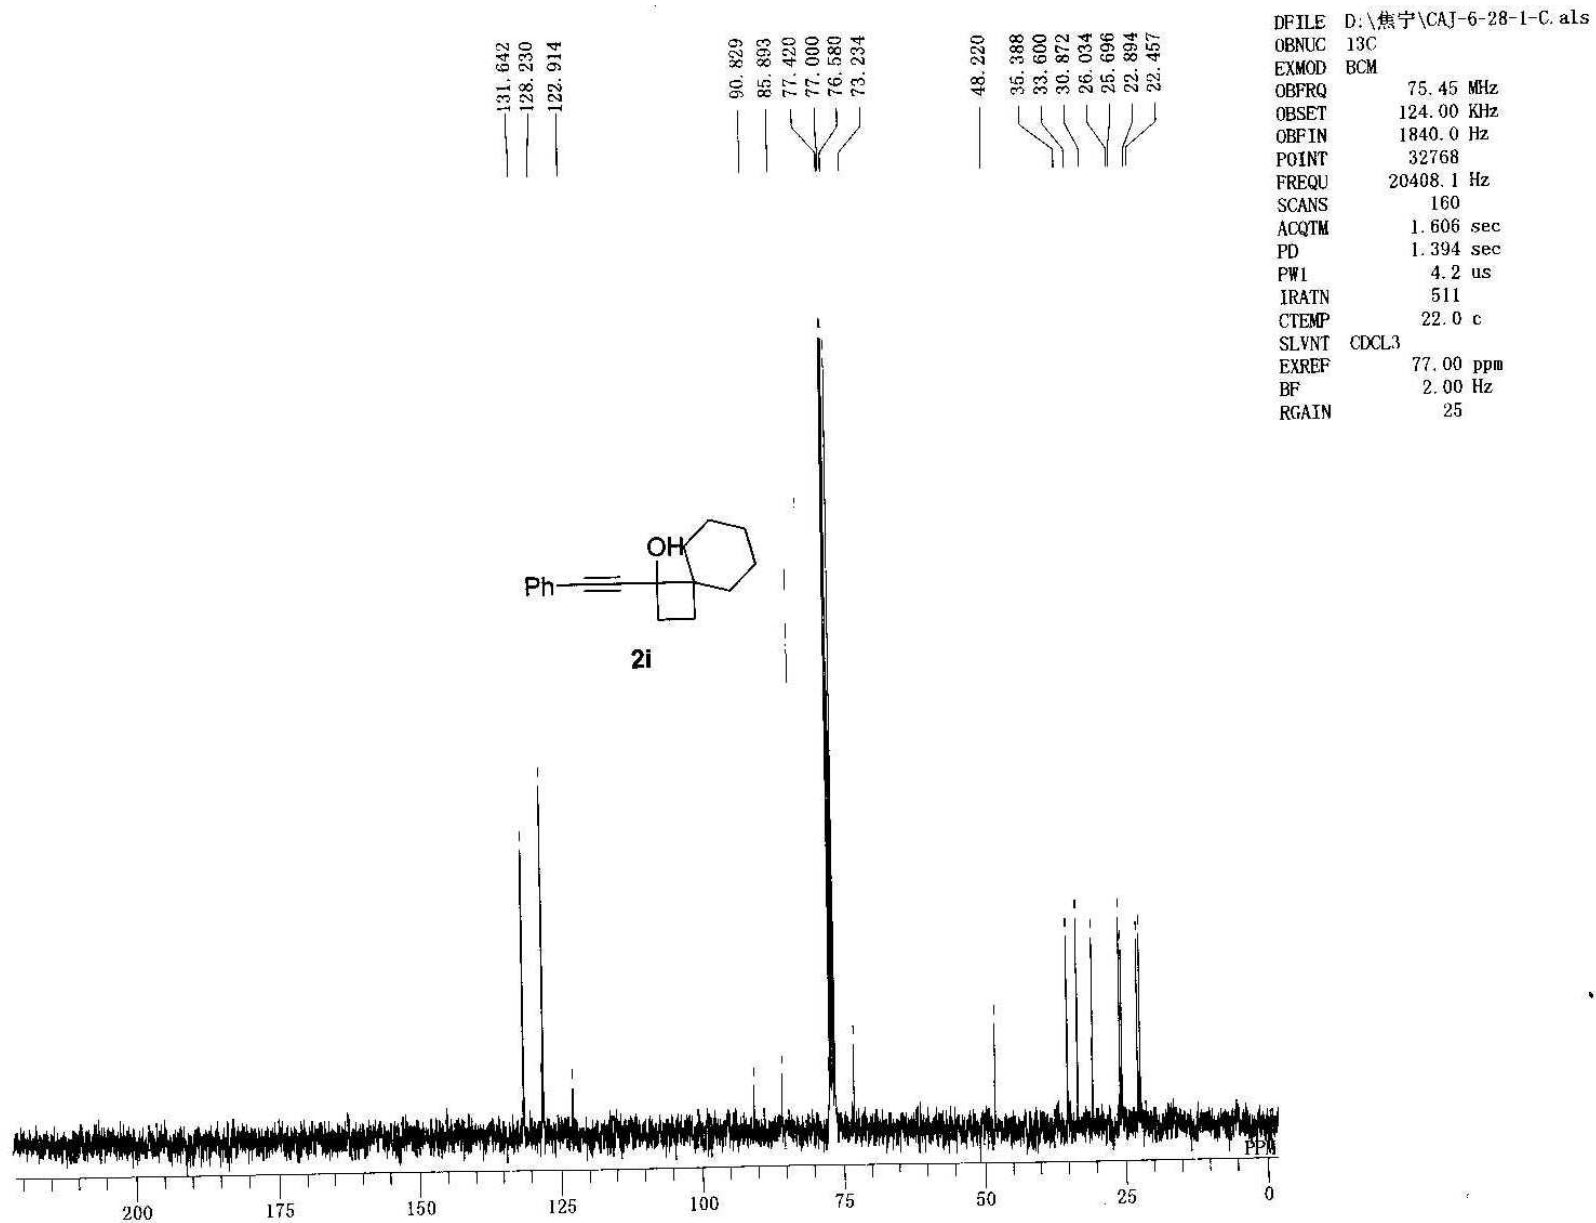

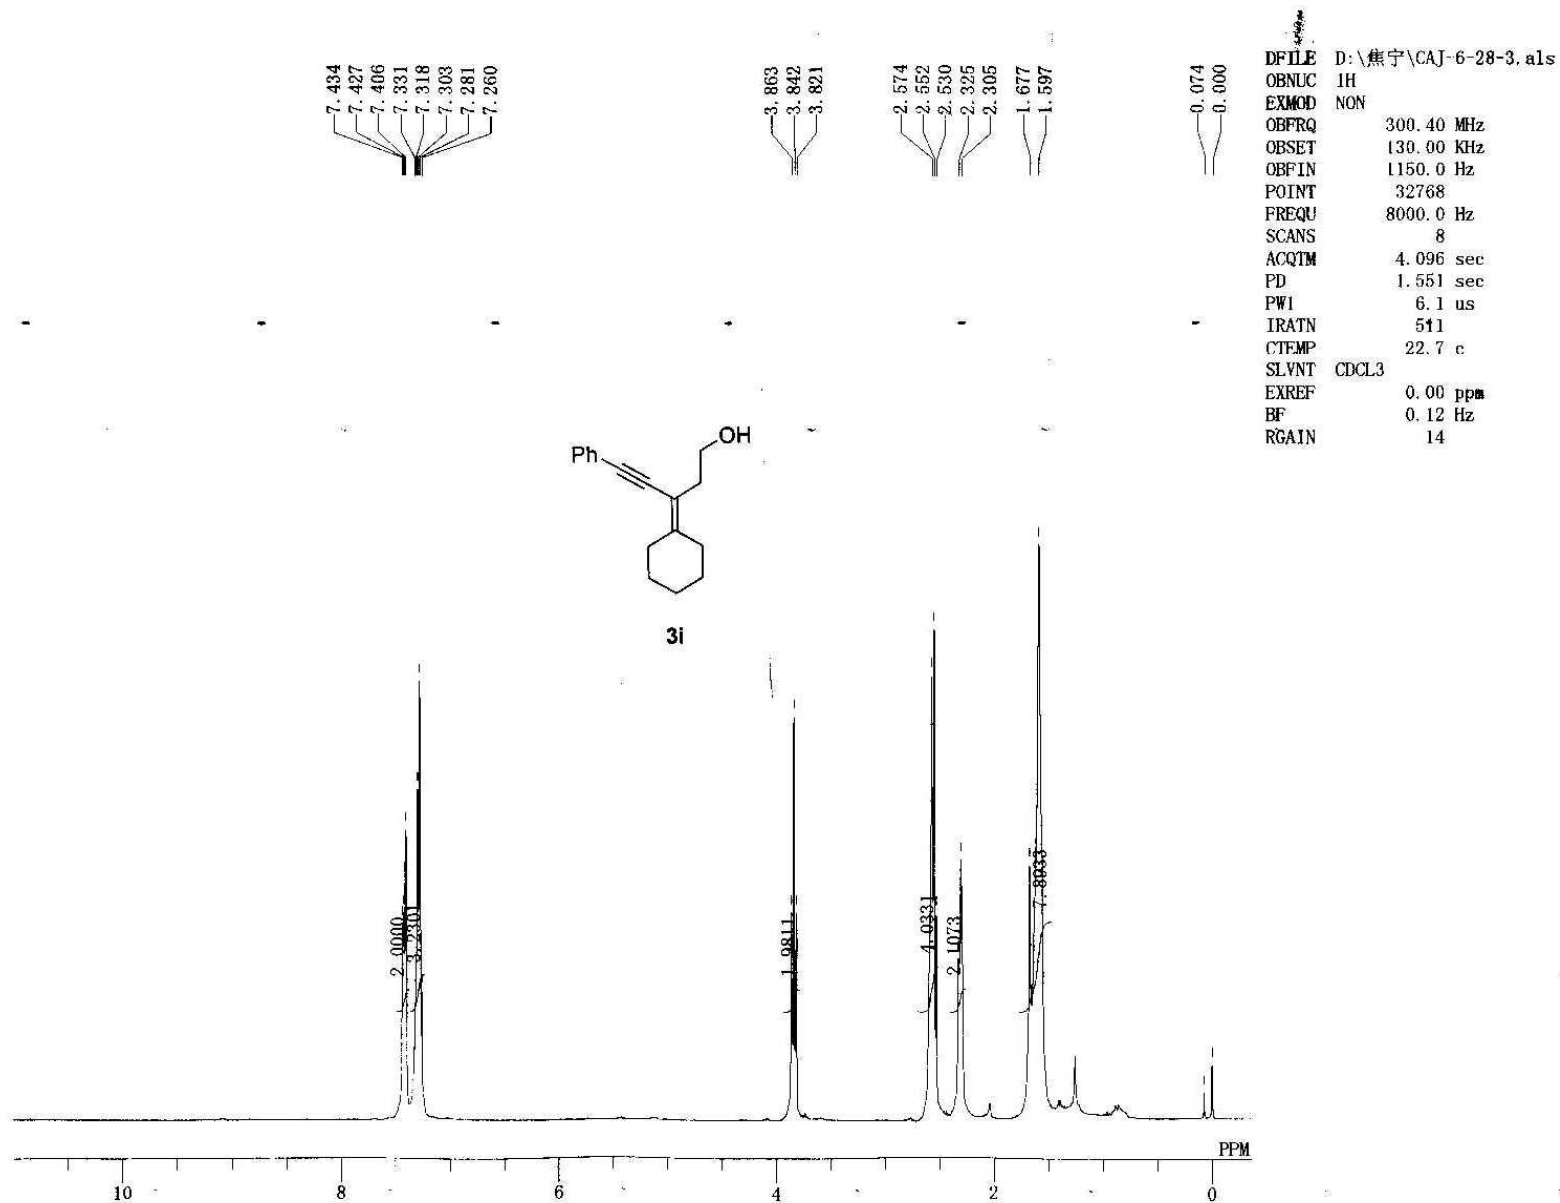

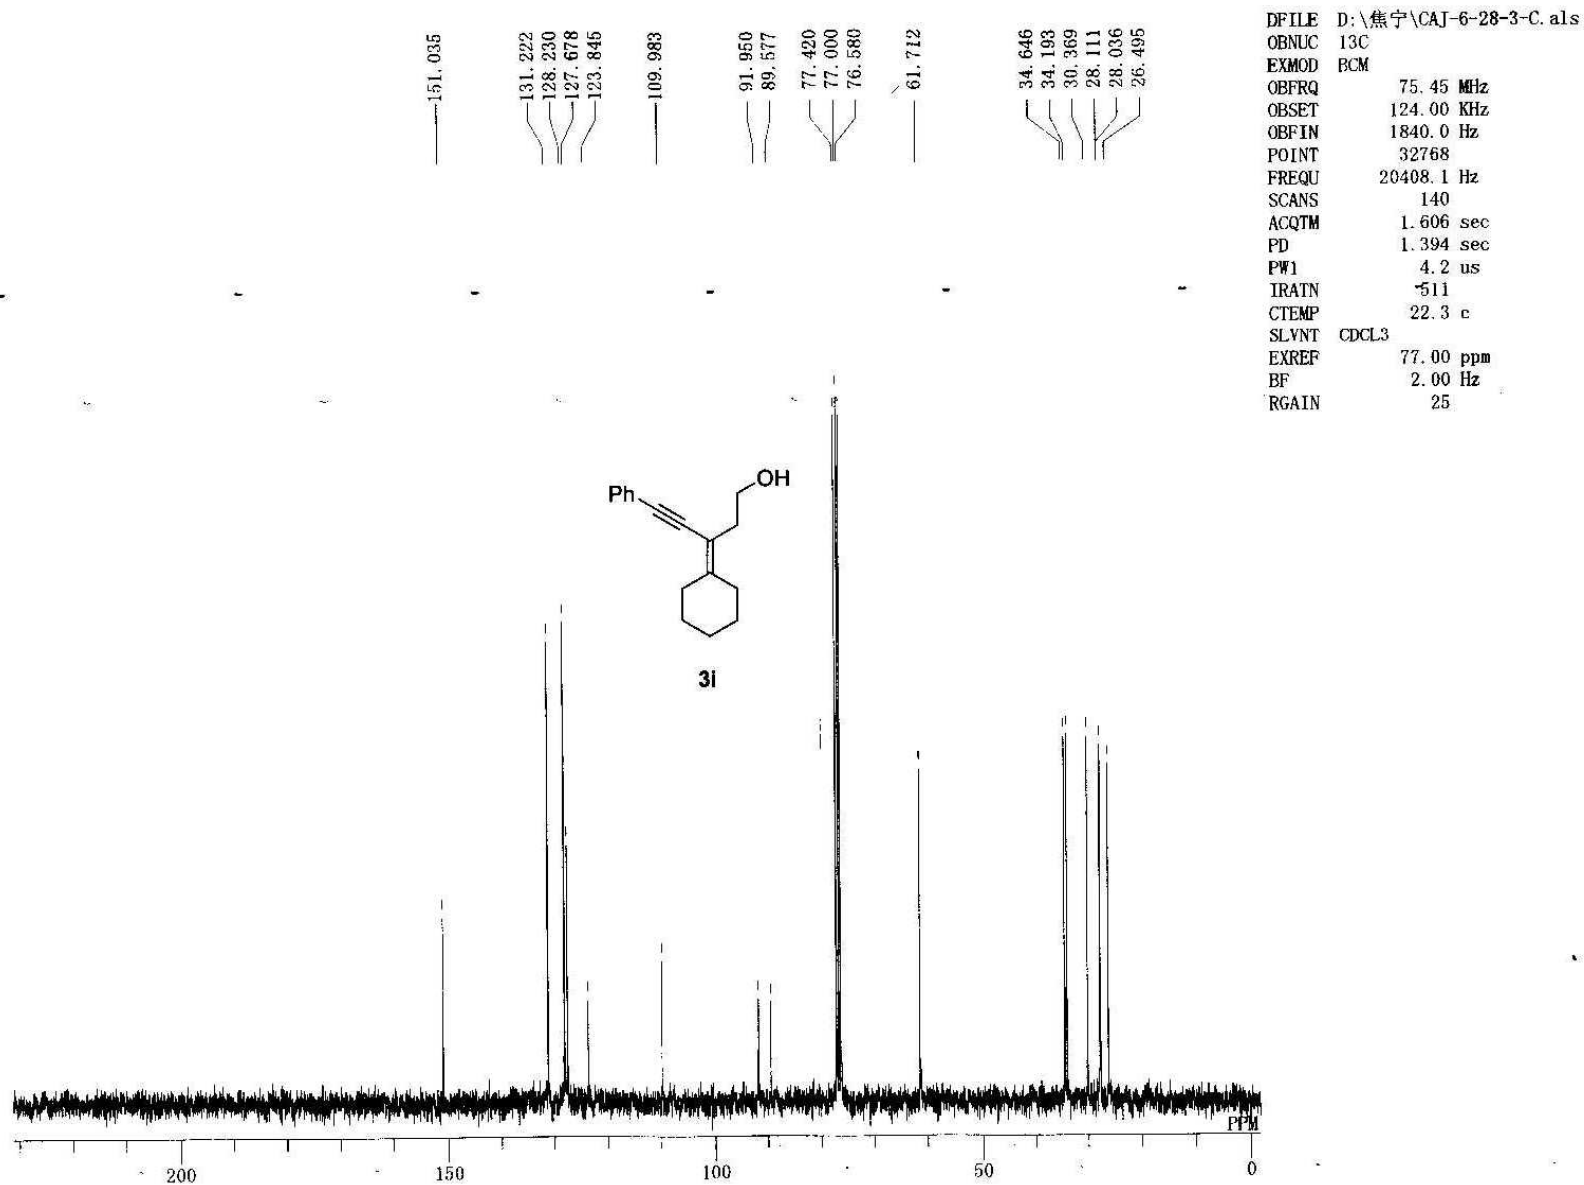

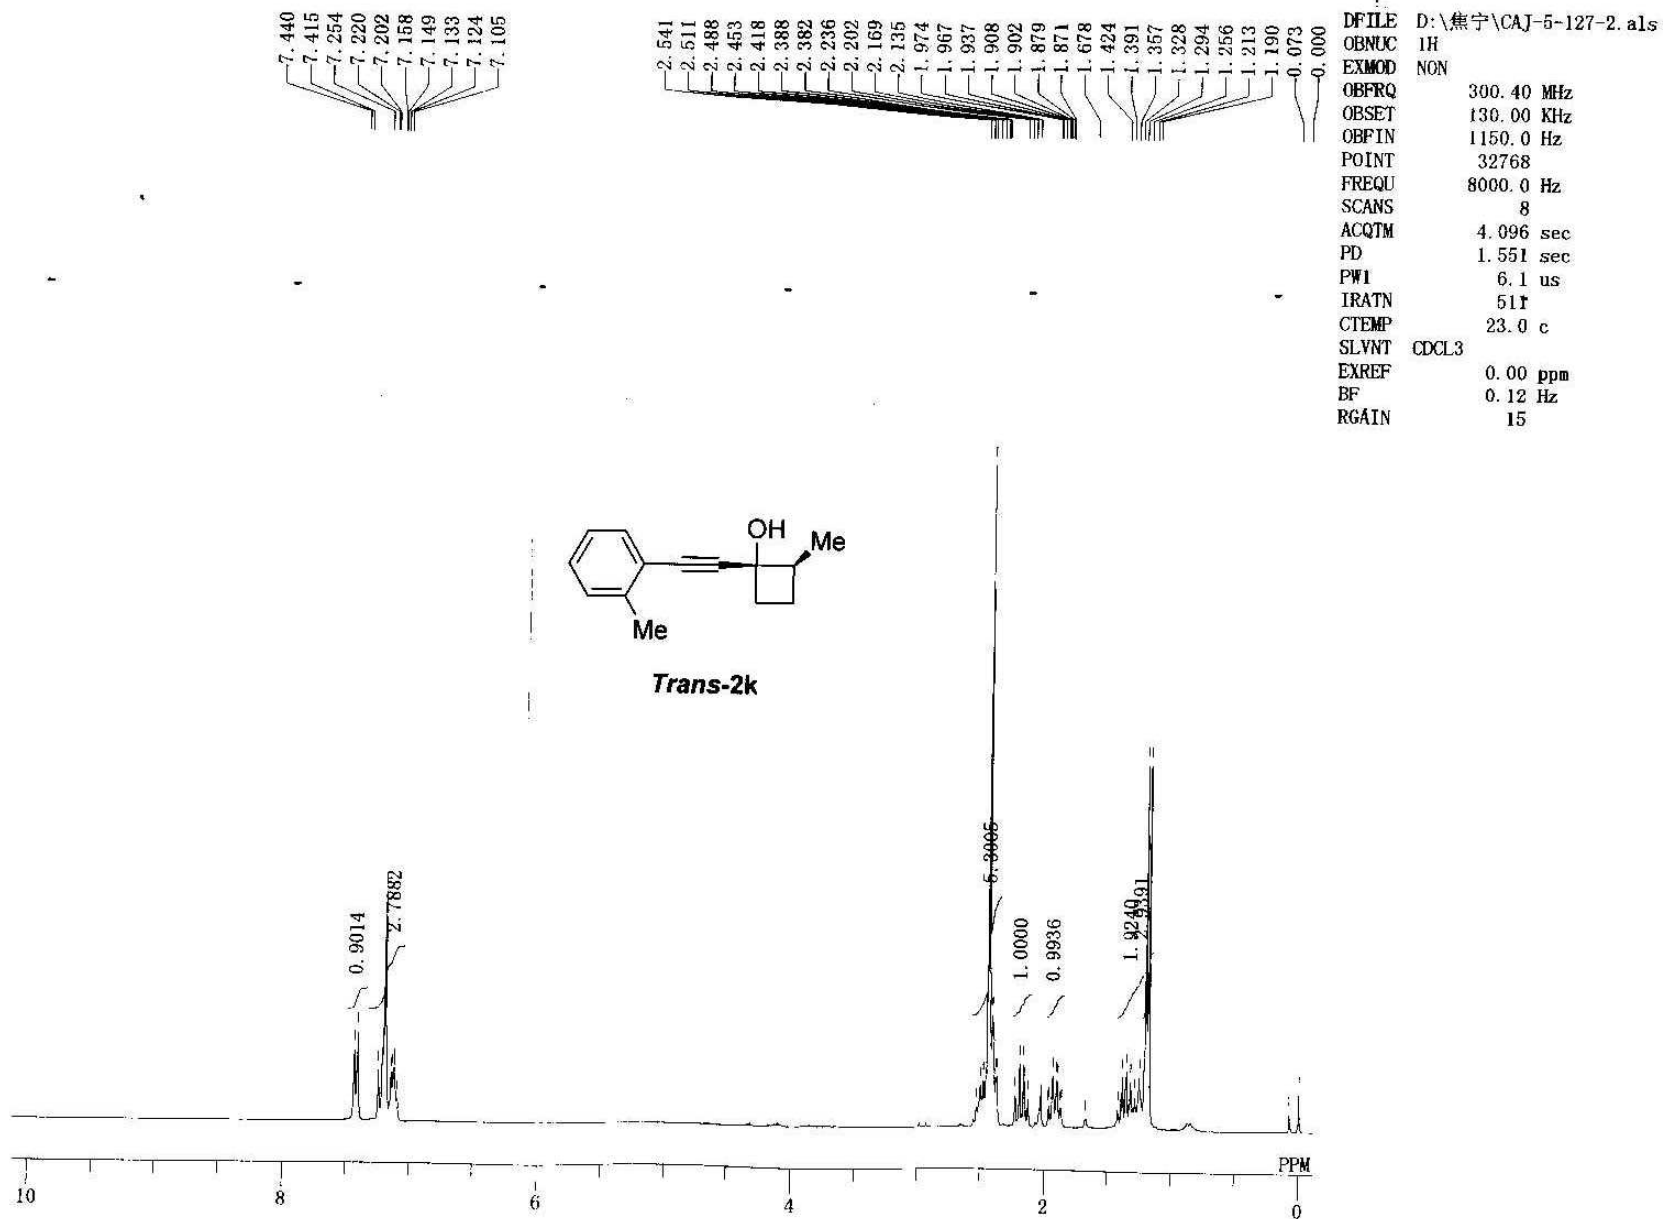



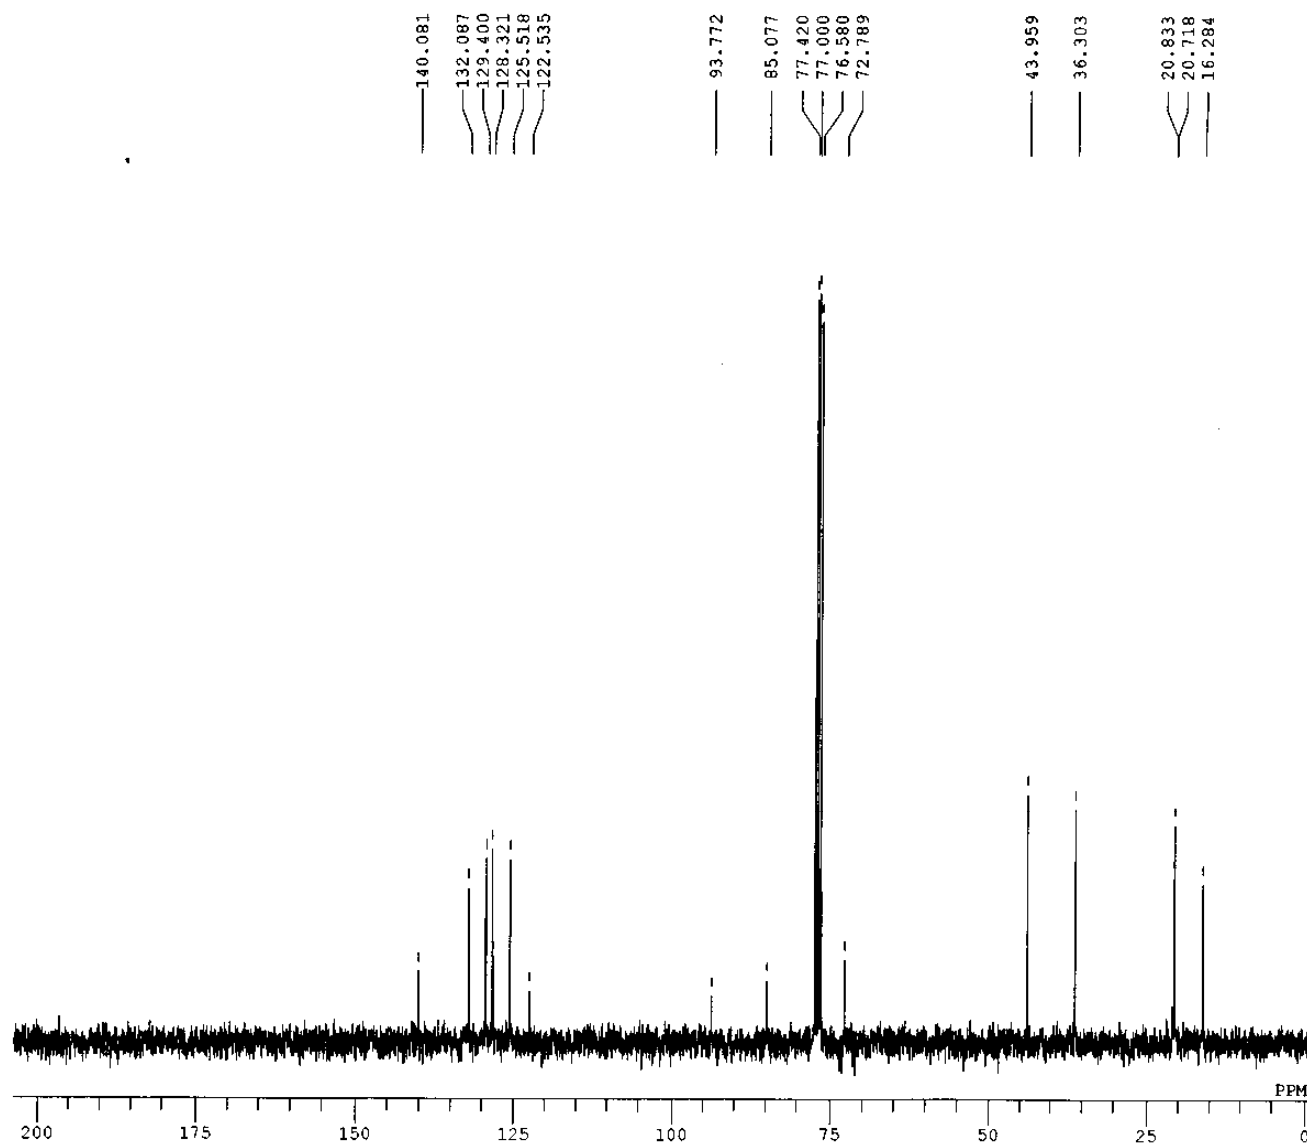

D:\...\\CAJ-5-127-2-C.als  
DFILE D:\...\\CAJ-5-127-2-C.als  
OBNUC 13C  
EXMOD BCM  
OBFRQ 75.45 MHz  
OBSET 124.00 KHz  
OBFIN 1840.0 Hz  
POINT 32768  
FREQU 20408.1 Hz  
SCANS 91  
ACQTM 1.606 sec  
PD 1.394 sec  
PWL 4.2 us  
IRATN 511  
CTEMP 22.5 c  
SLVNT CDCL3  
EXREF 77.00 ppm  
BF 2.00 Hz  
RGAIN 25

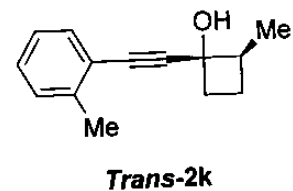

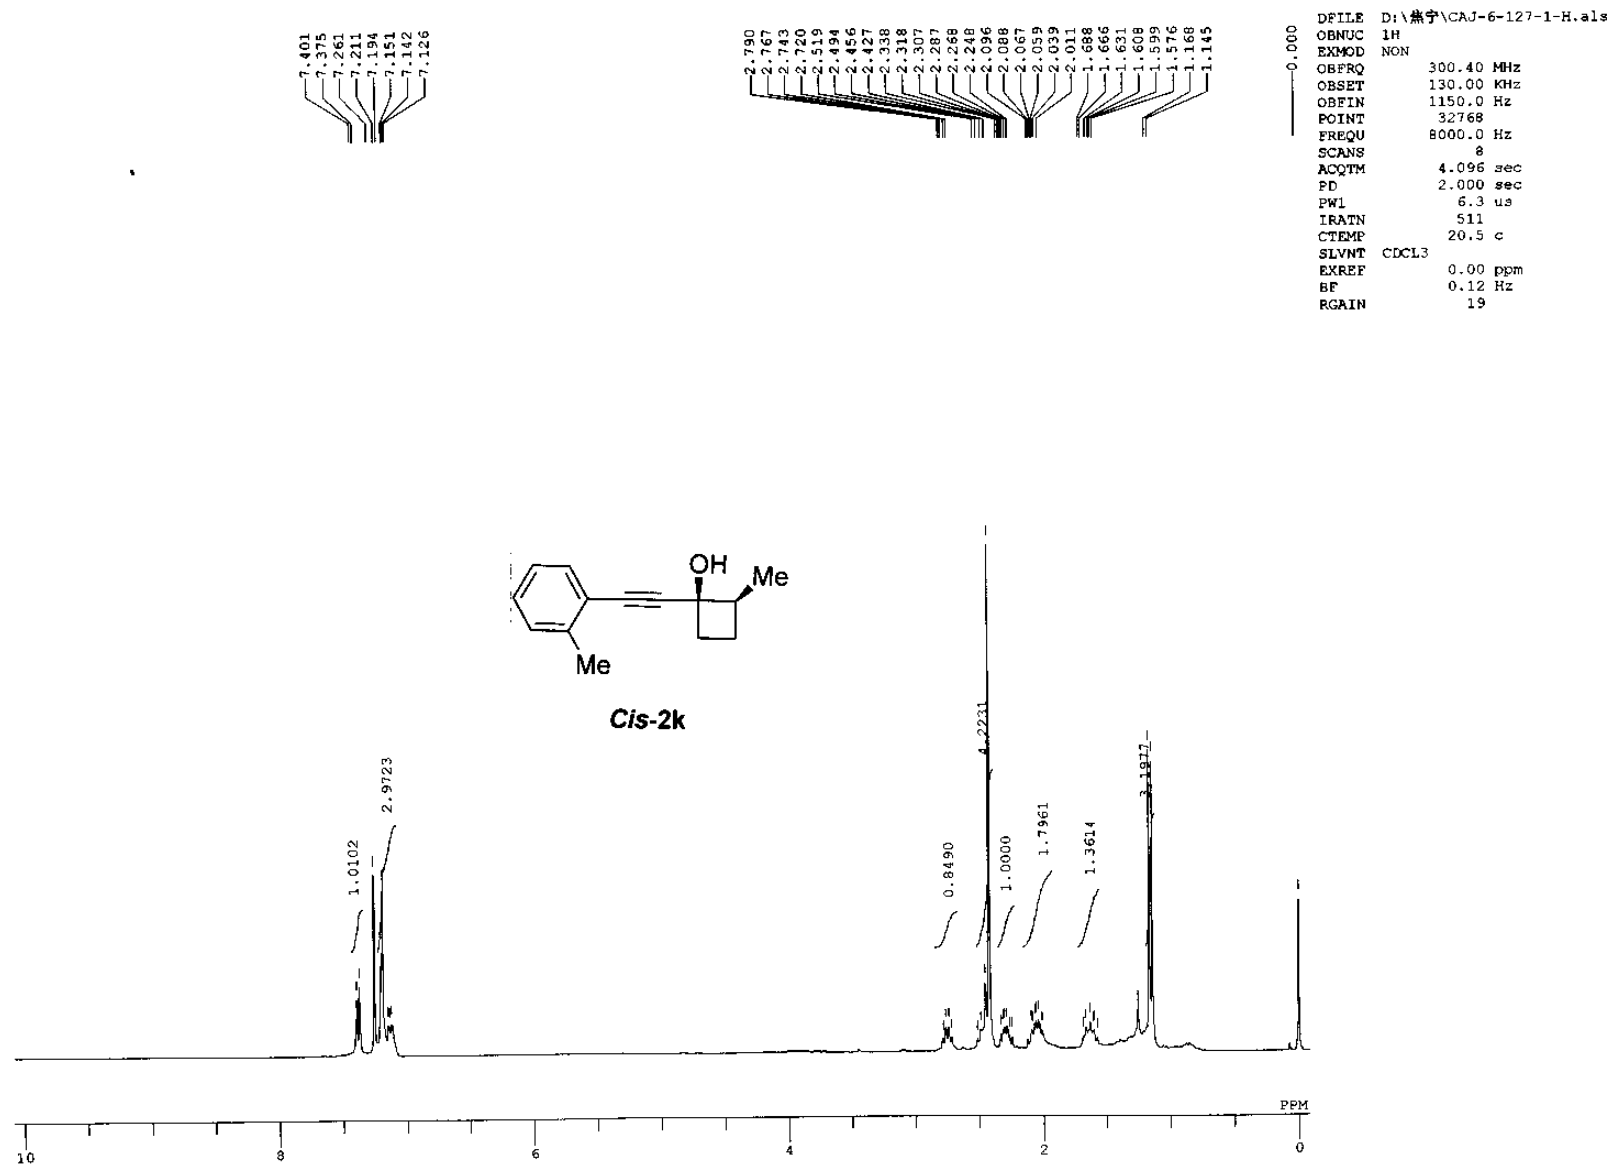

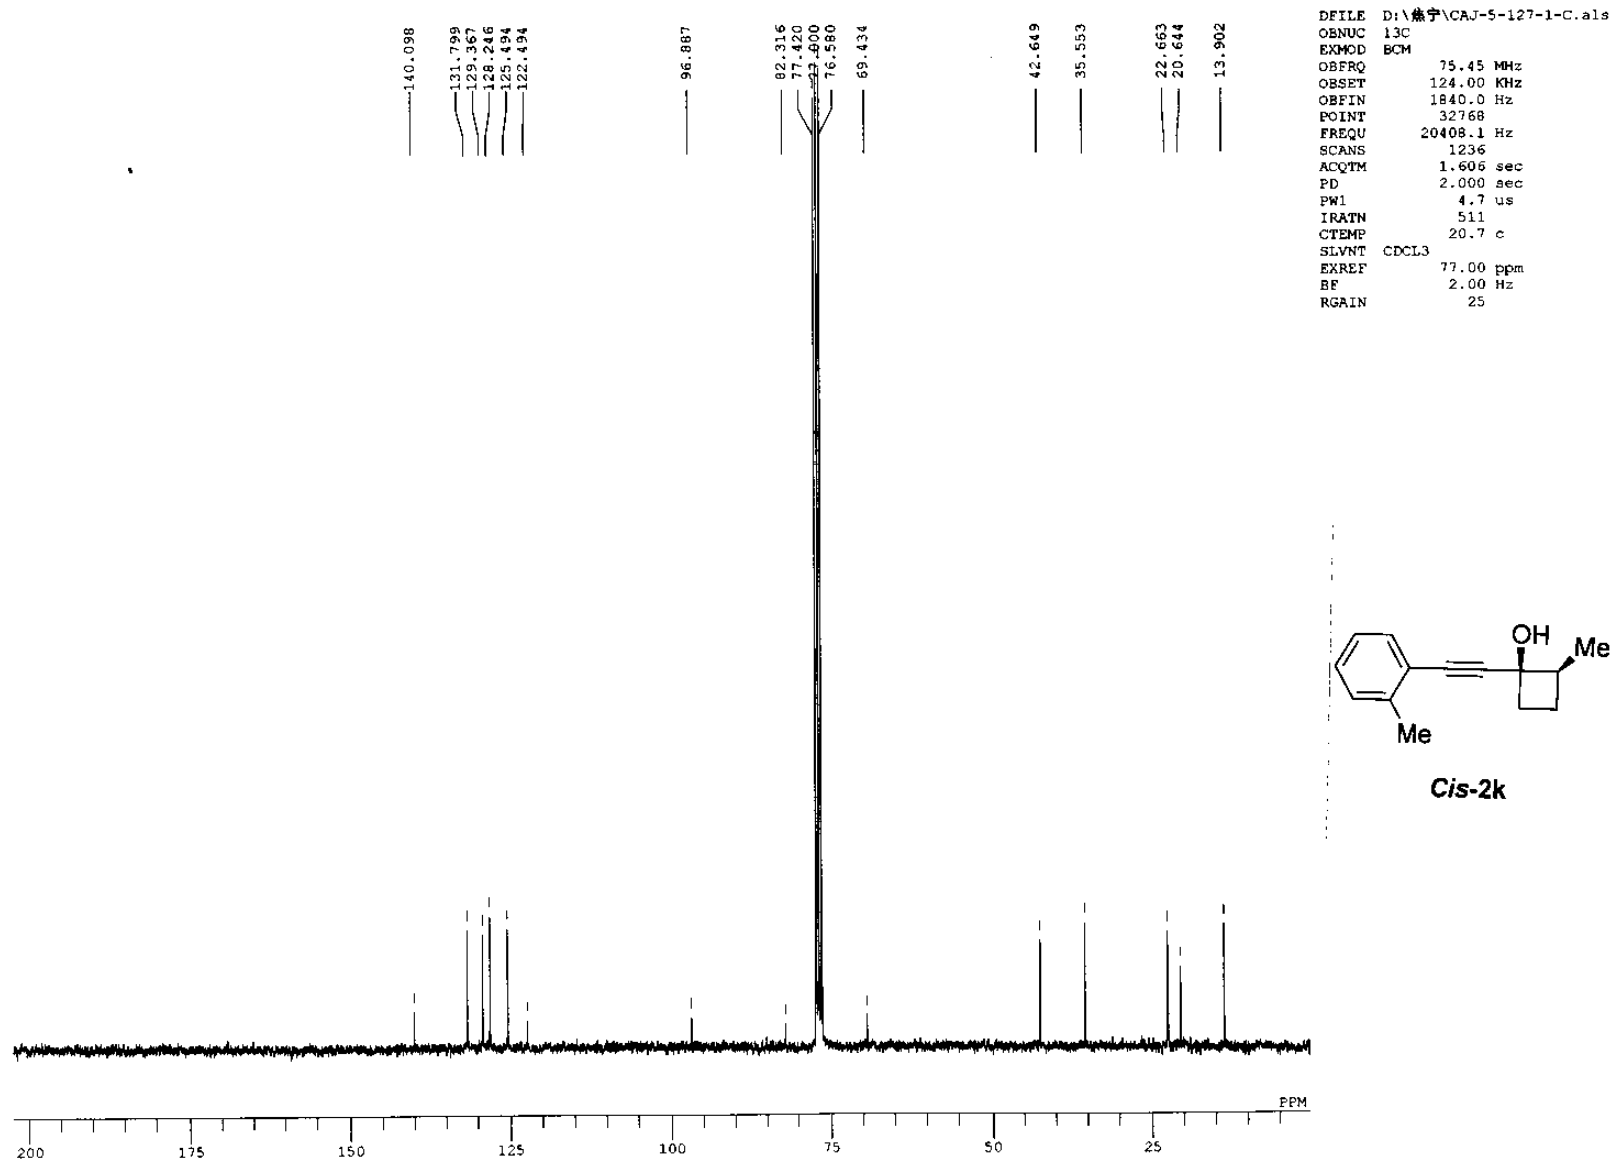

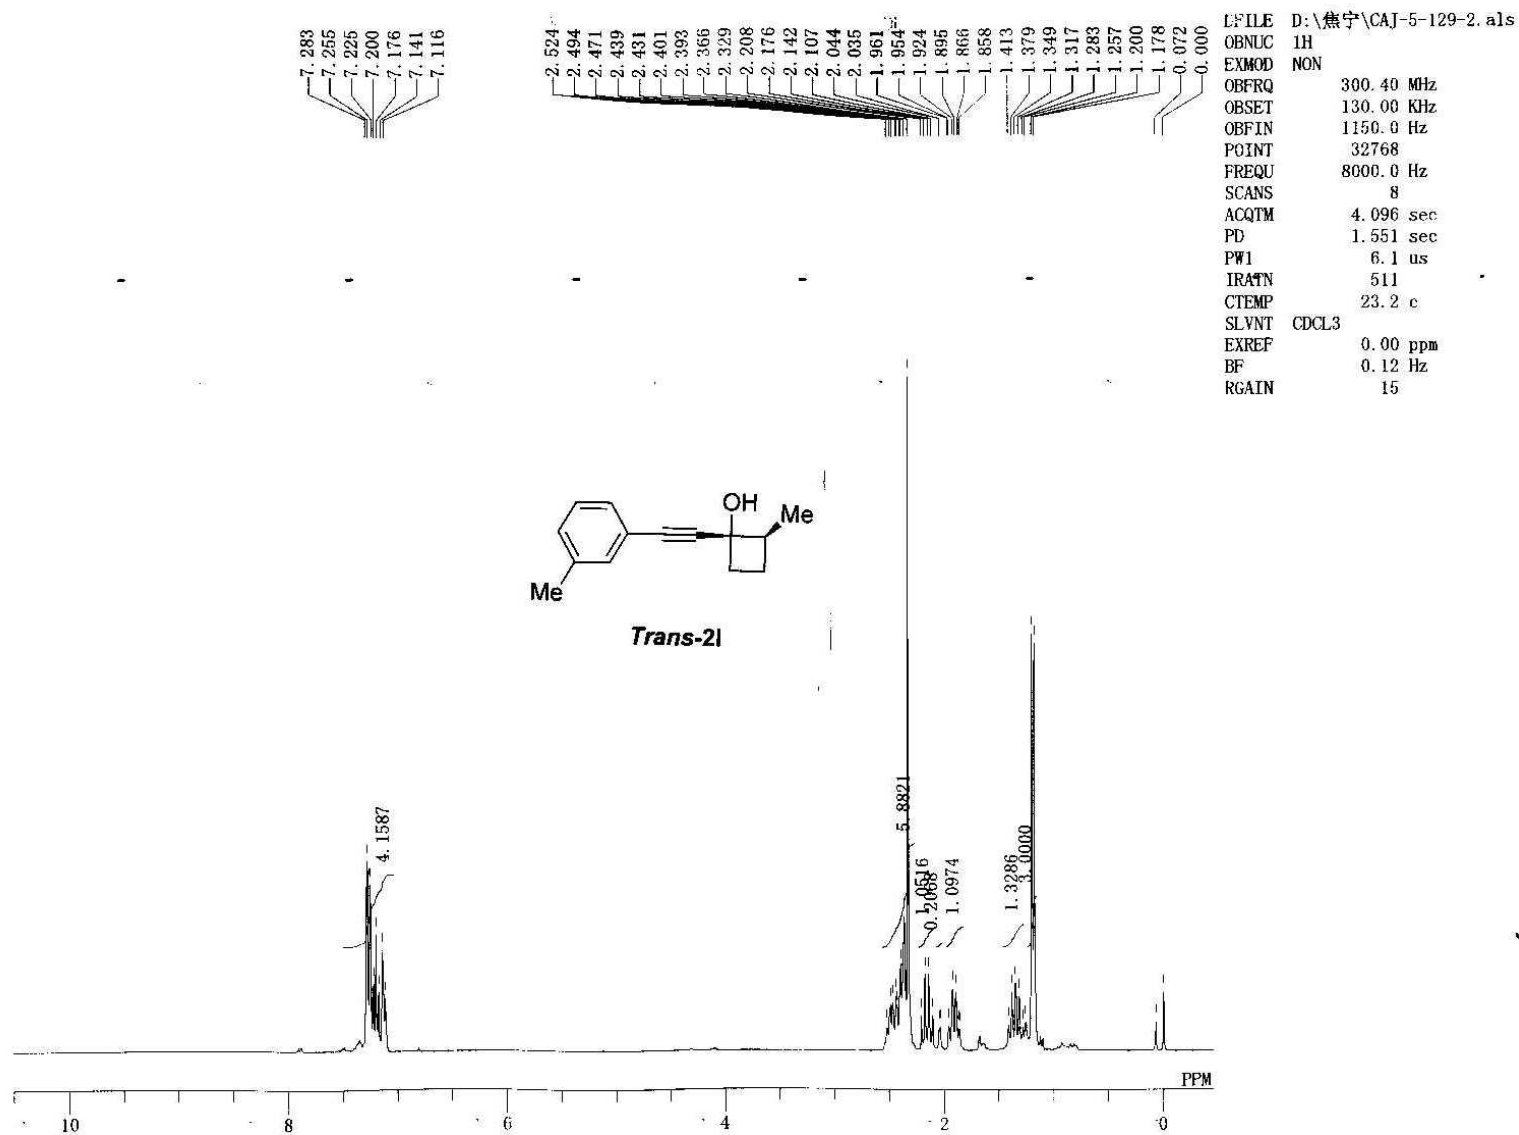

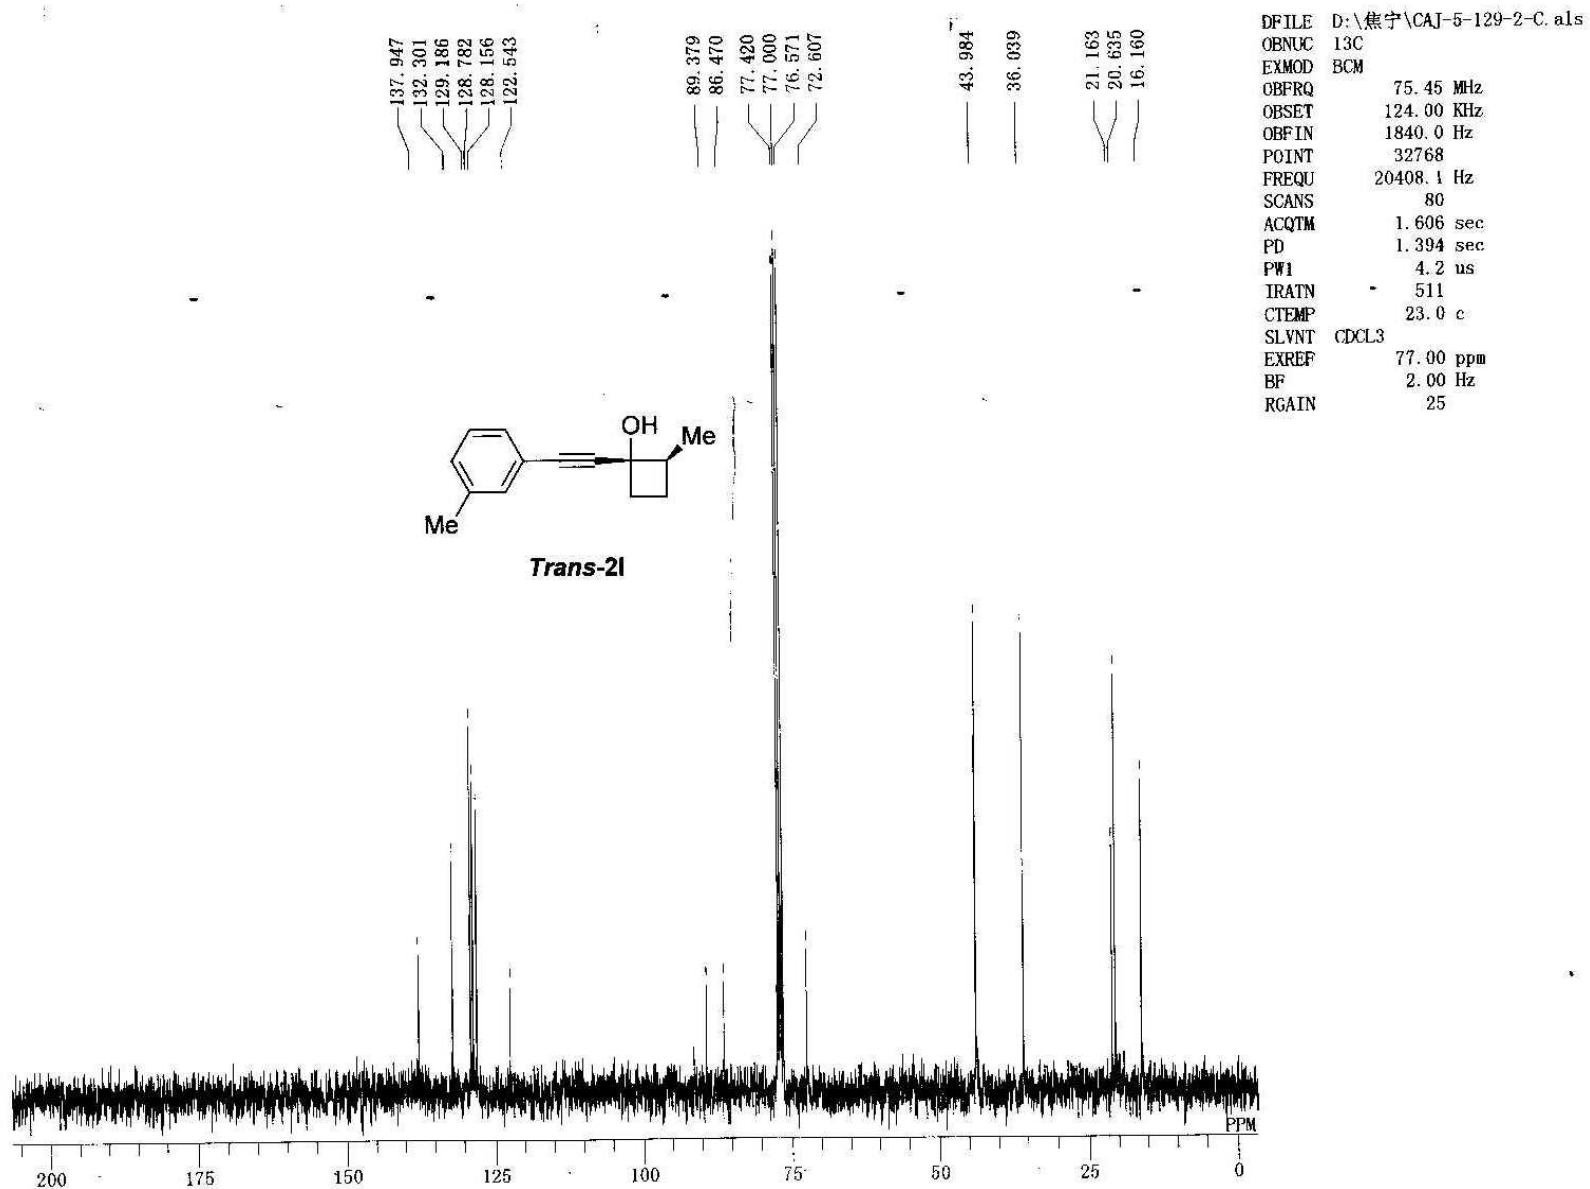

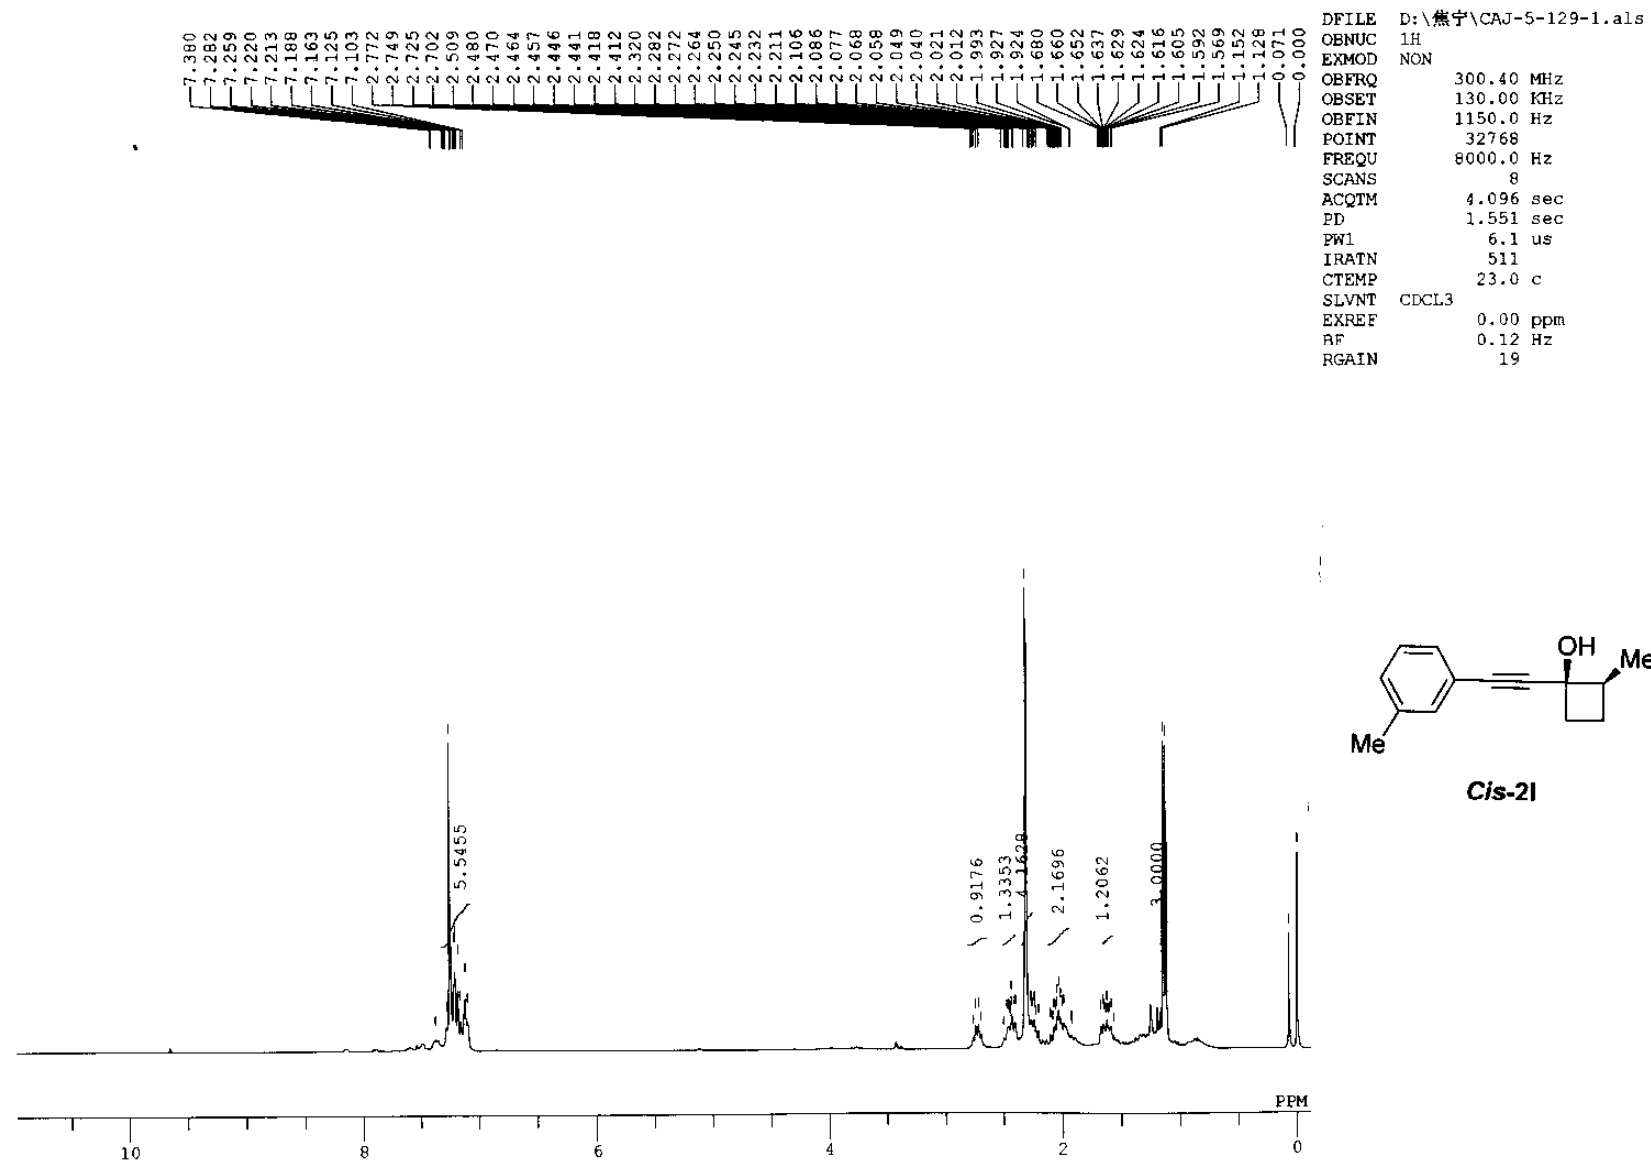

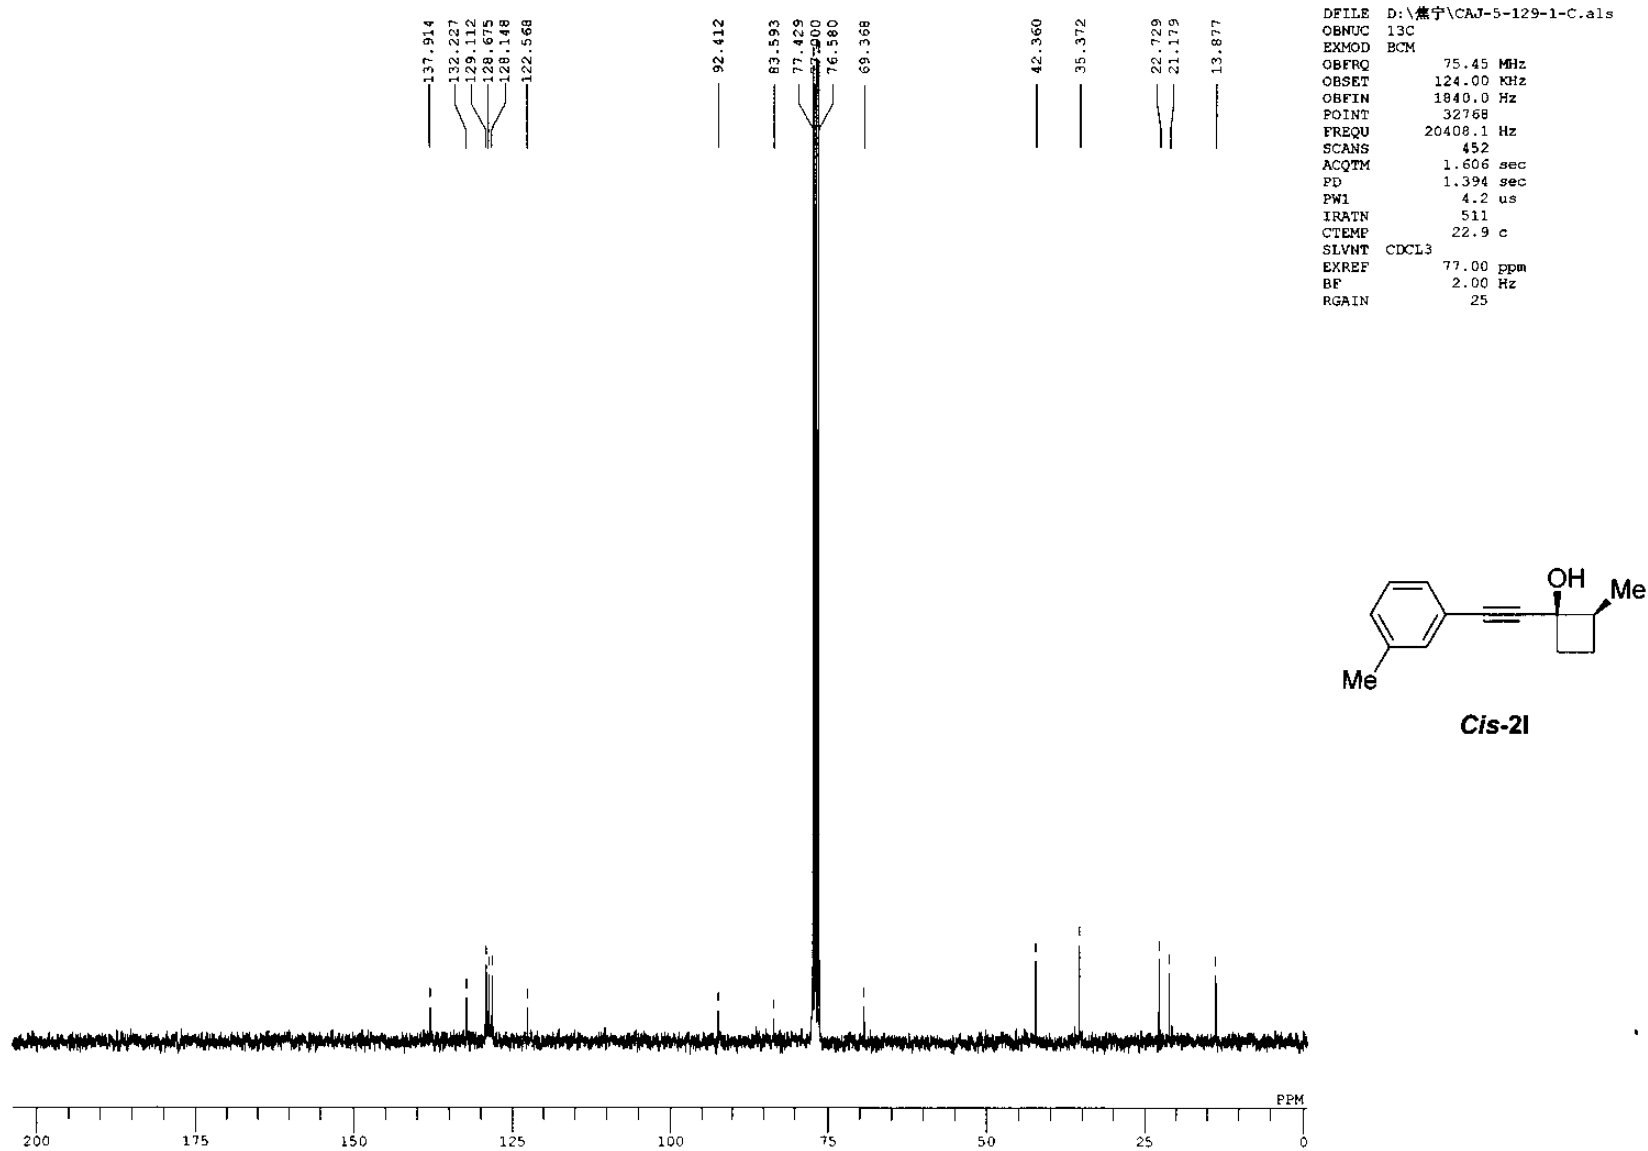

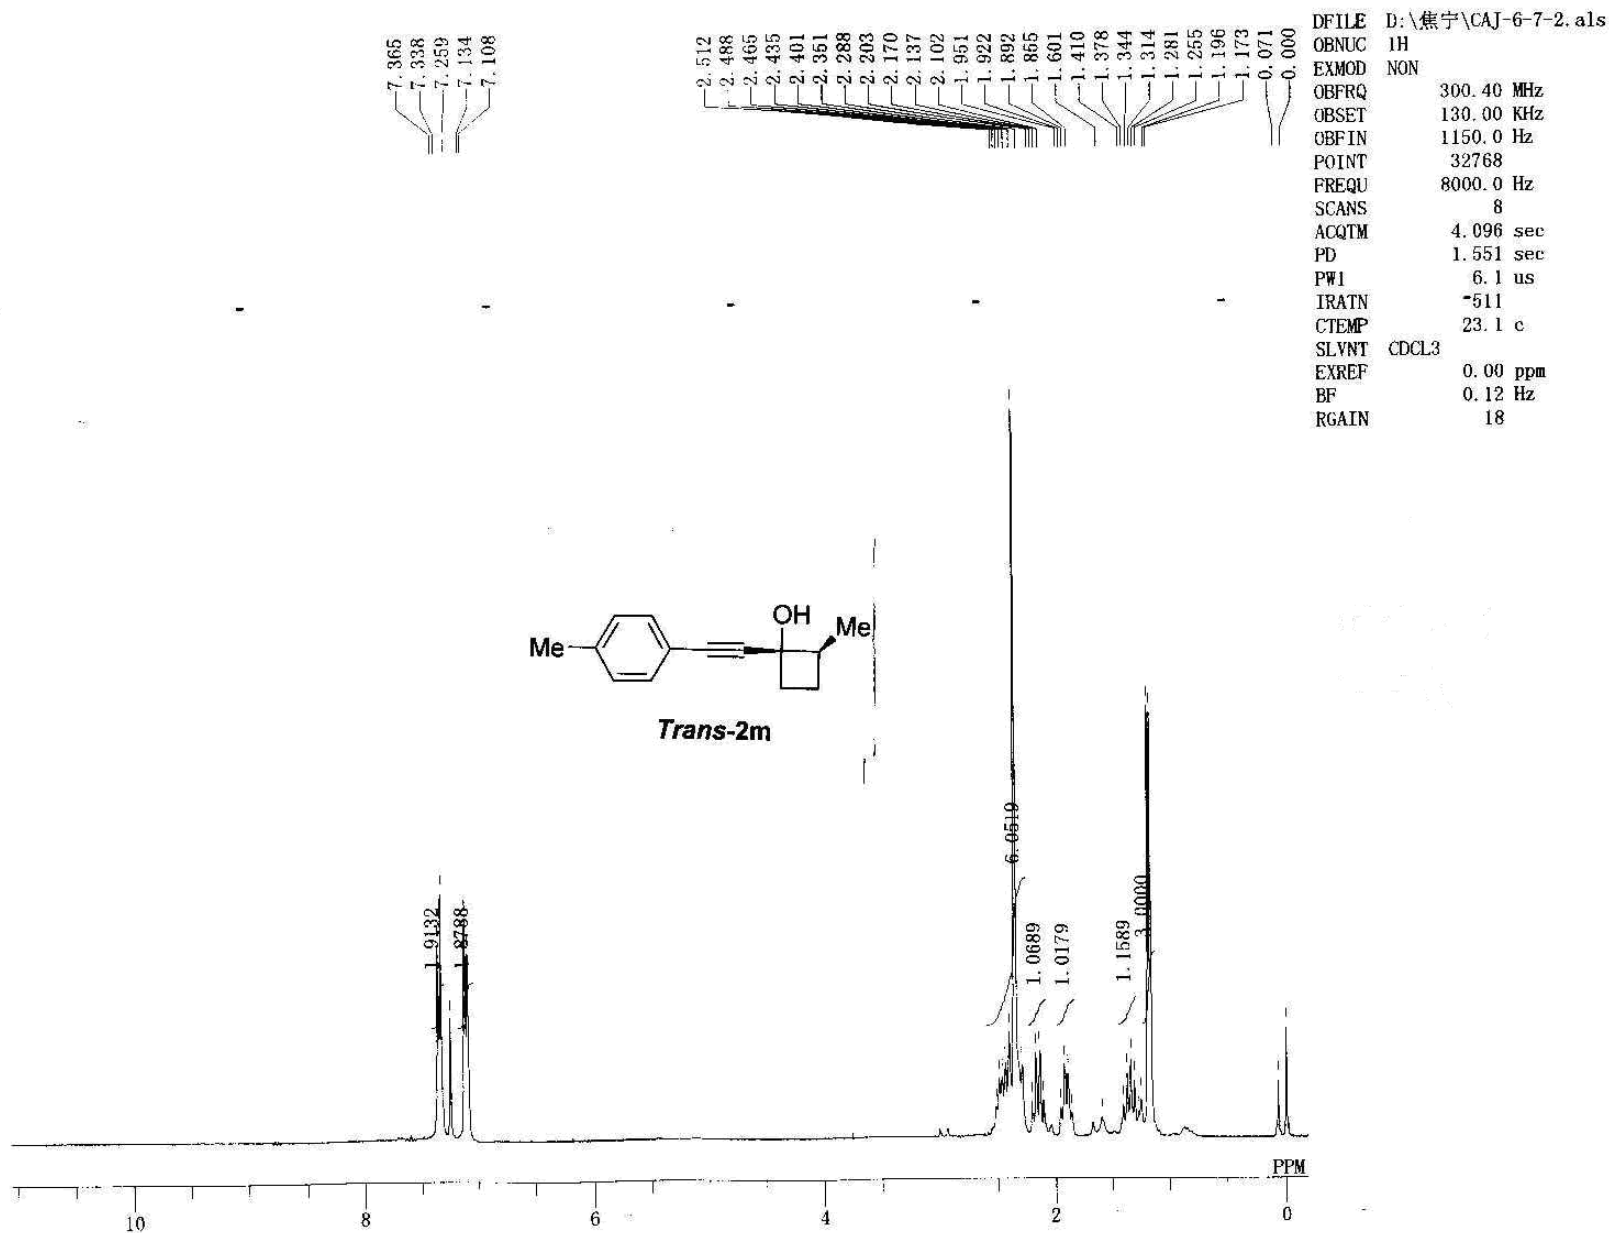



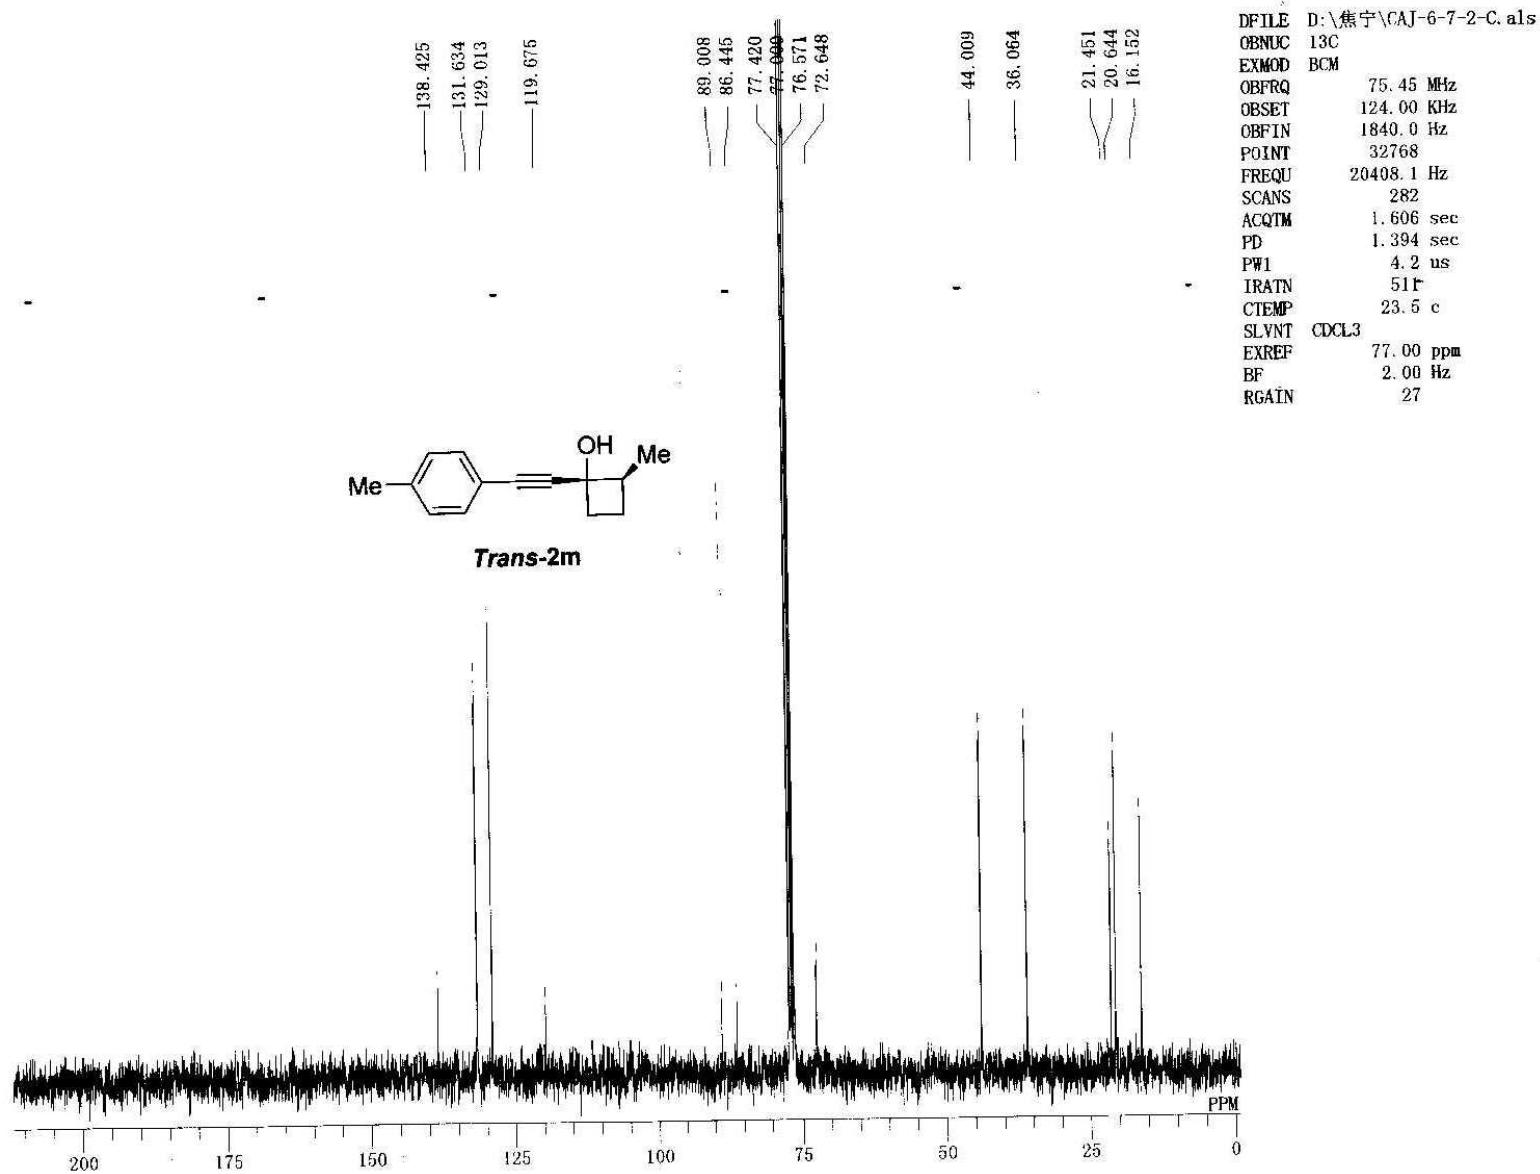

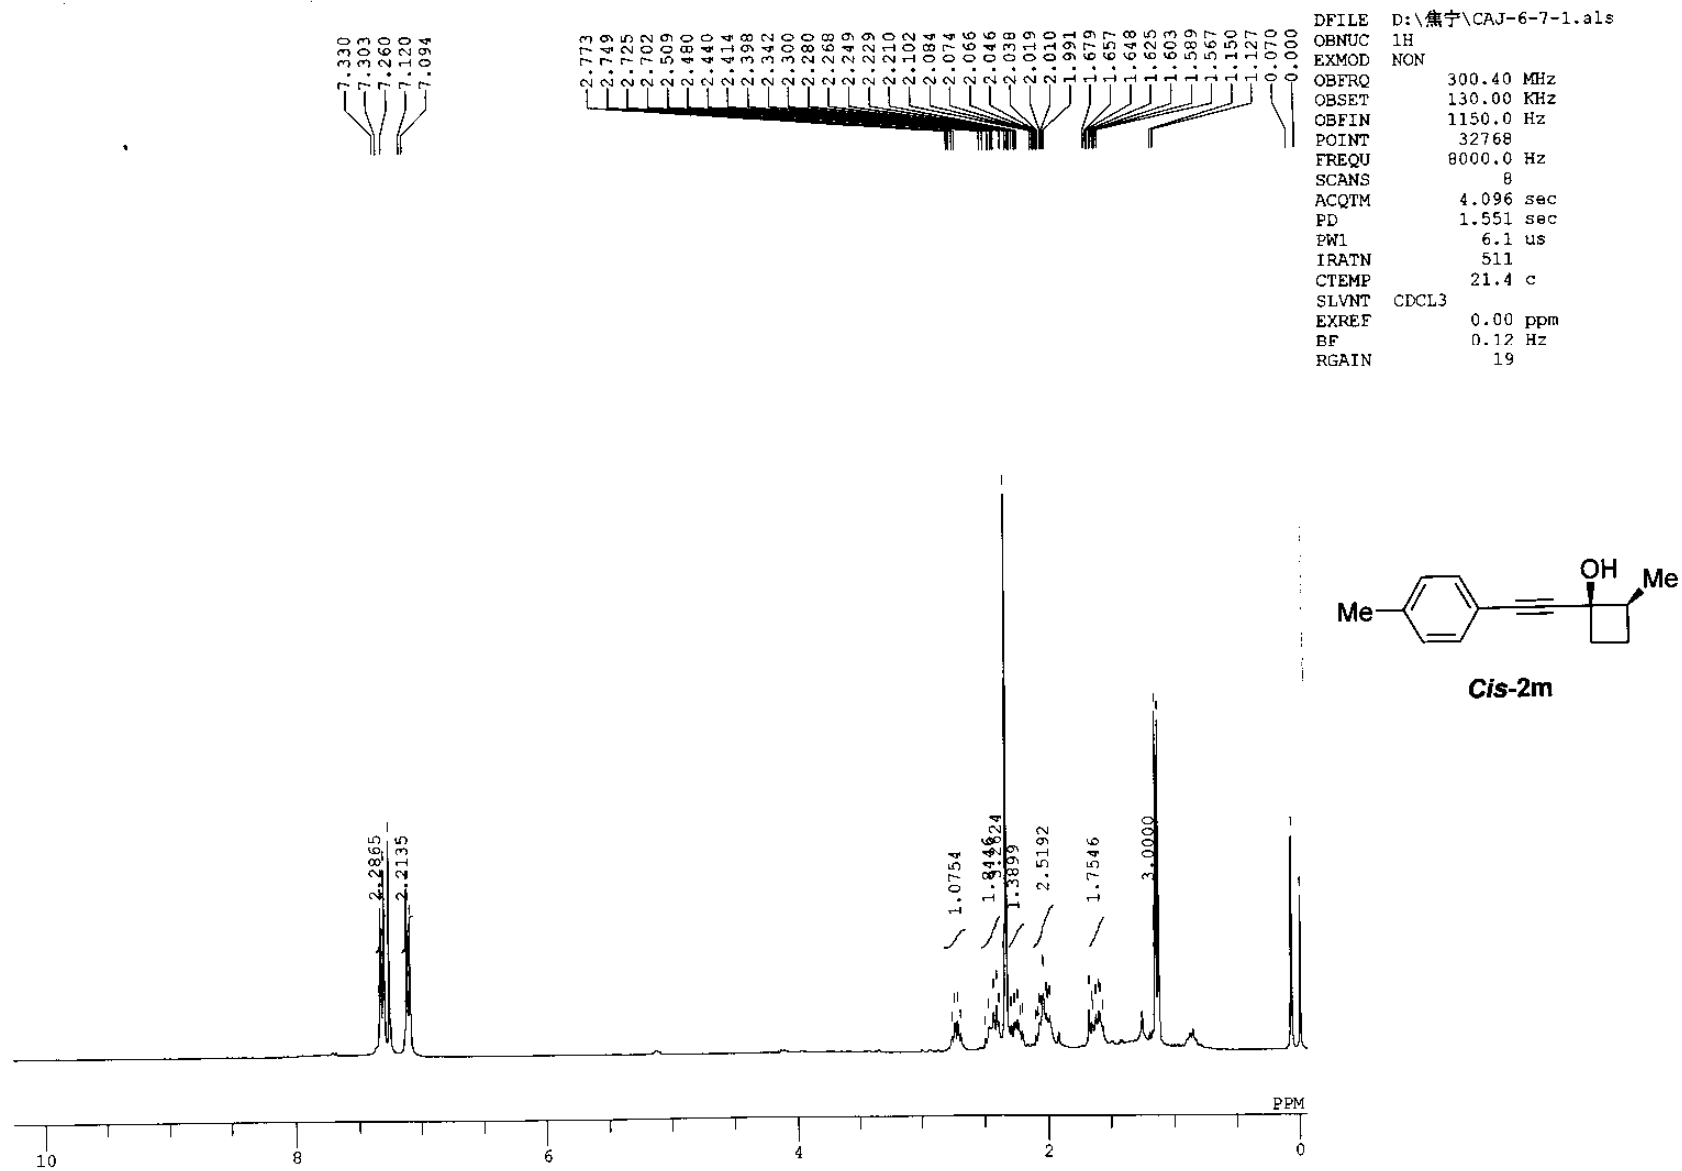

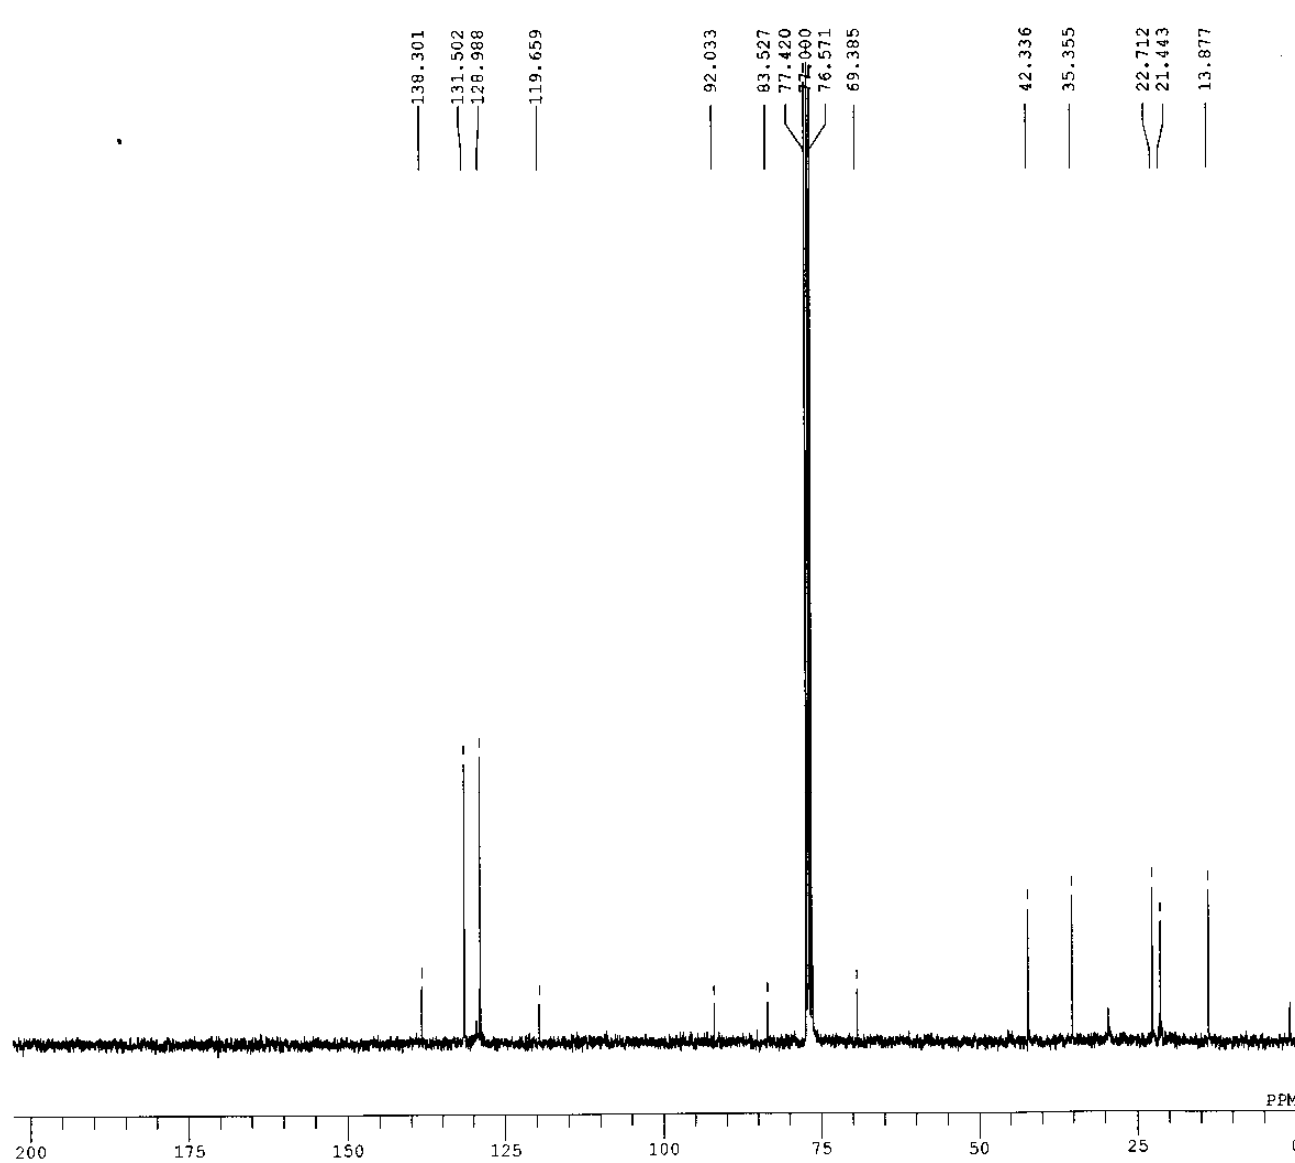

D:\焦宁\CAJ-6-7-1-C.als  
DFILE  
OBNUC 13C  
EXMOD BCM  
OBFRQ 75.45 MHz  
OBSET 124.00 KHz  
OBFIN 1840.0 Hz  
POINT 32768  
FREQU 20408.1 Hz  
SCANS 932  
ACQTM 1.606 sec  
PD 2.000 sec  
PWI 4.7 us  
IRATN 511  
CTEMP 20.6 c  
SLVNT CDCL3  
EXREF 77.00 ppm  
BF 2.00 Hz  
RGAIN 25

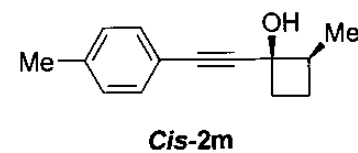

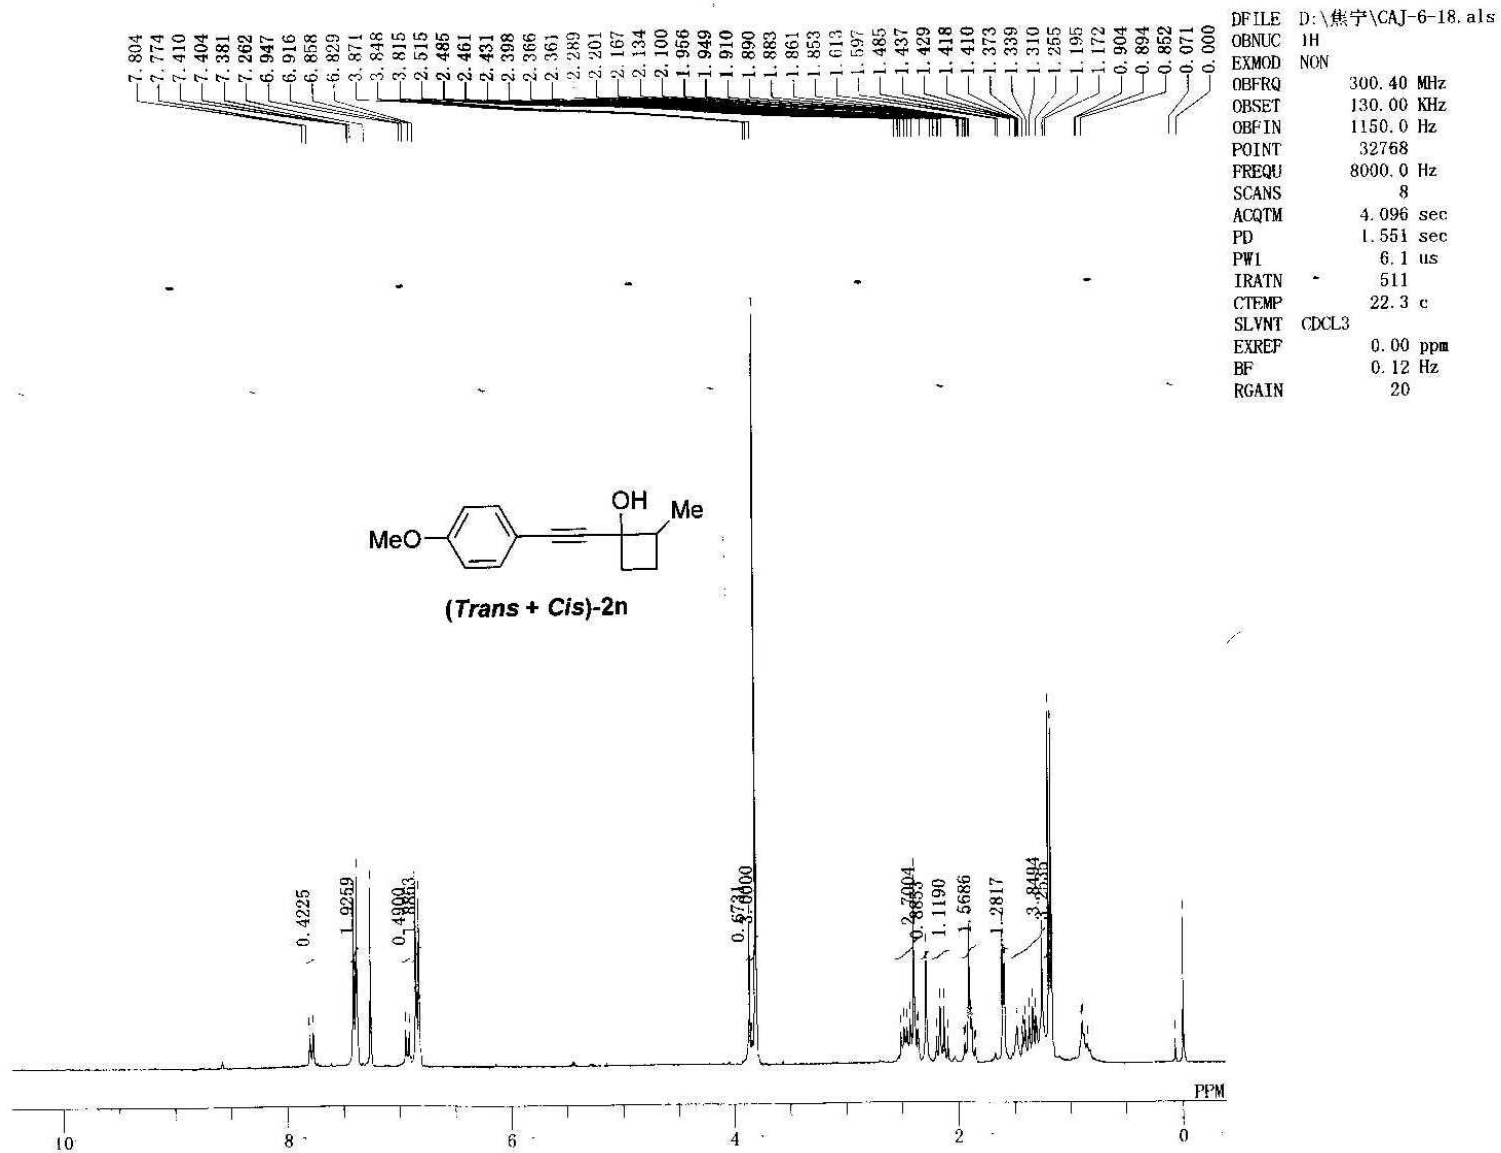

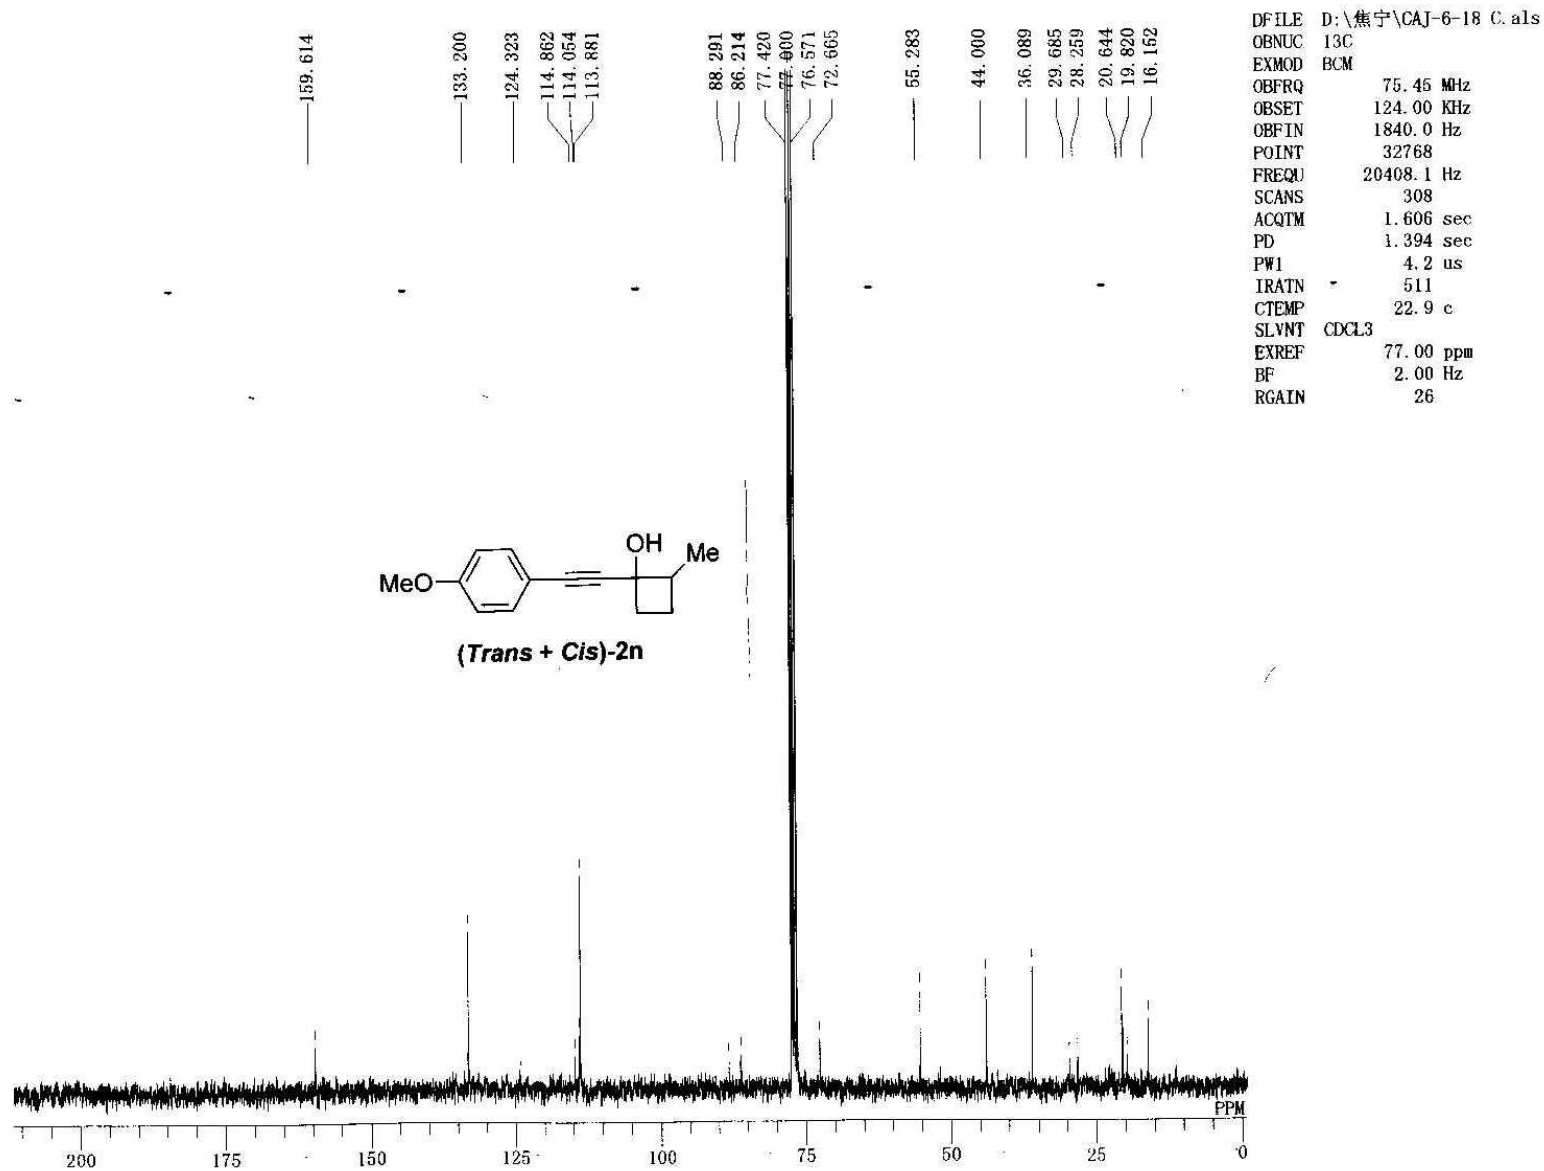

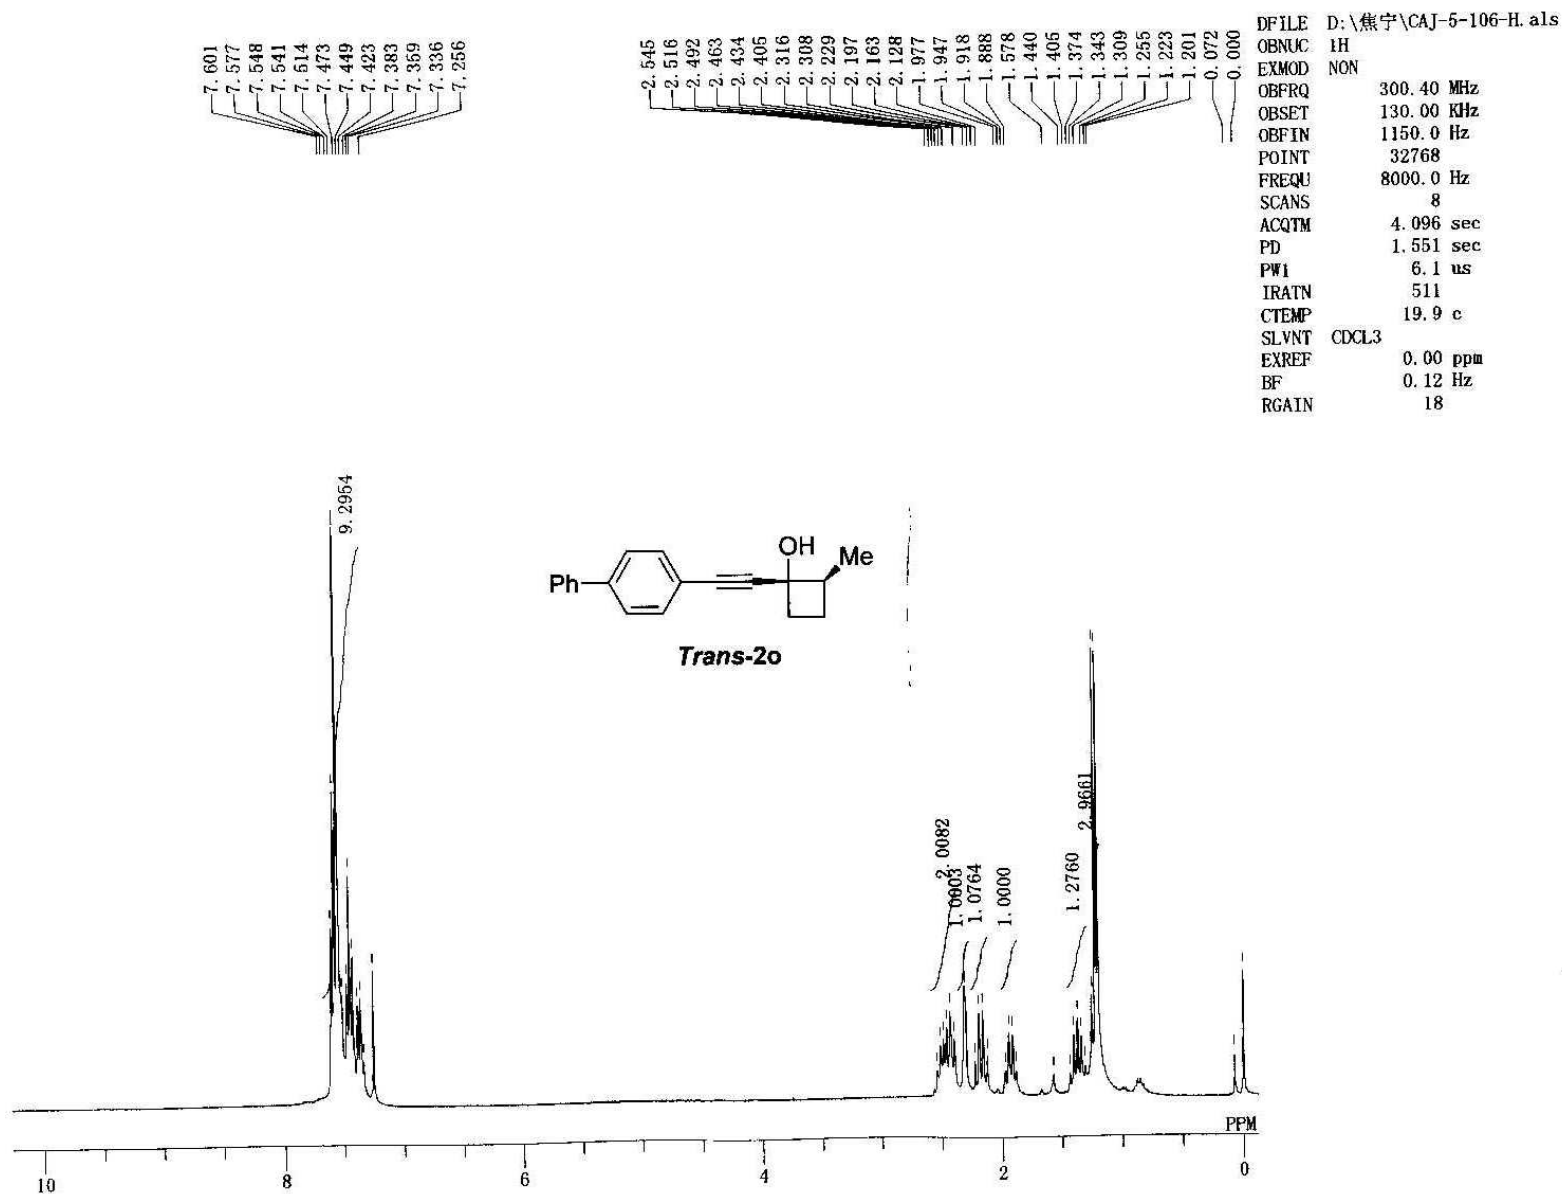

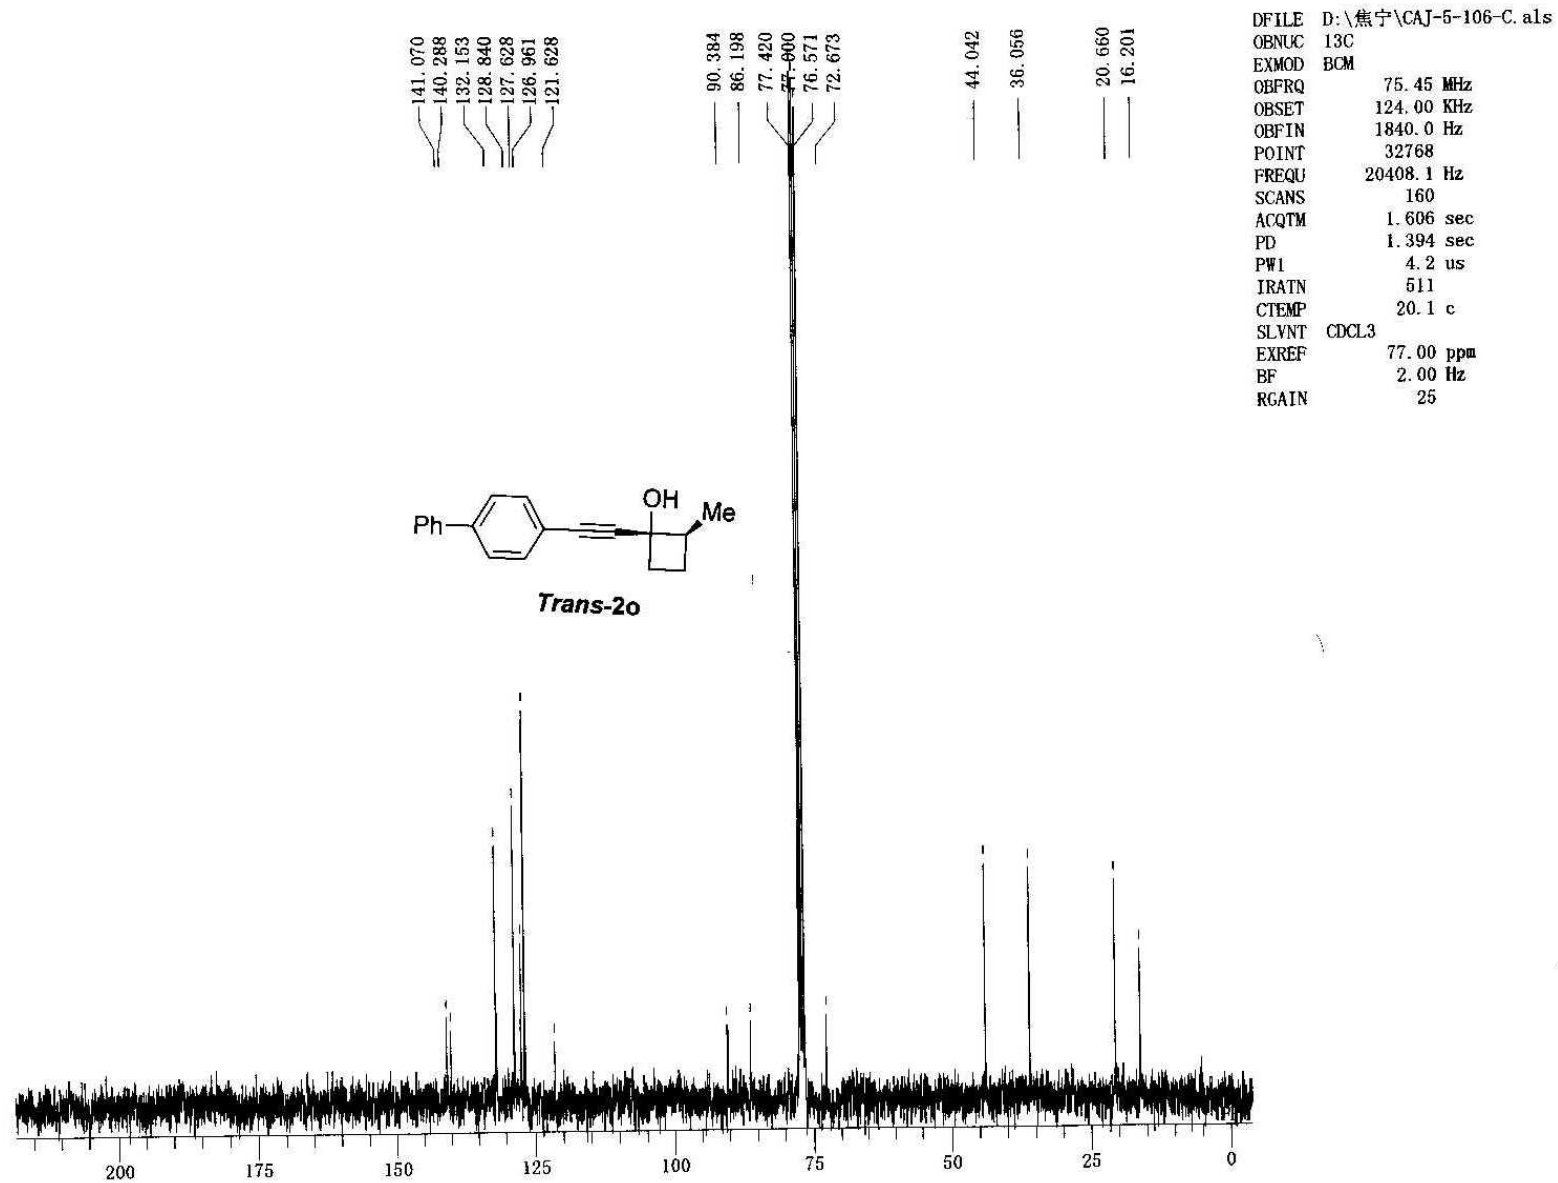

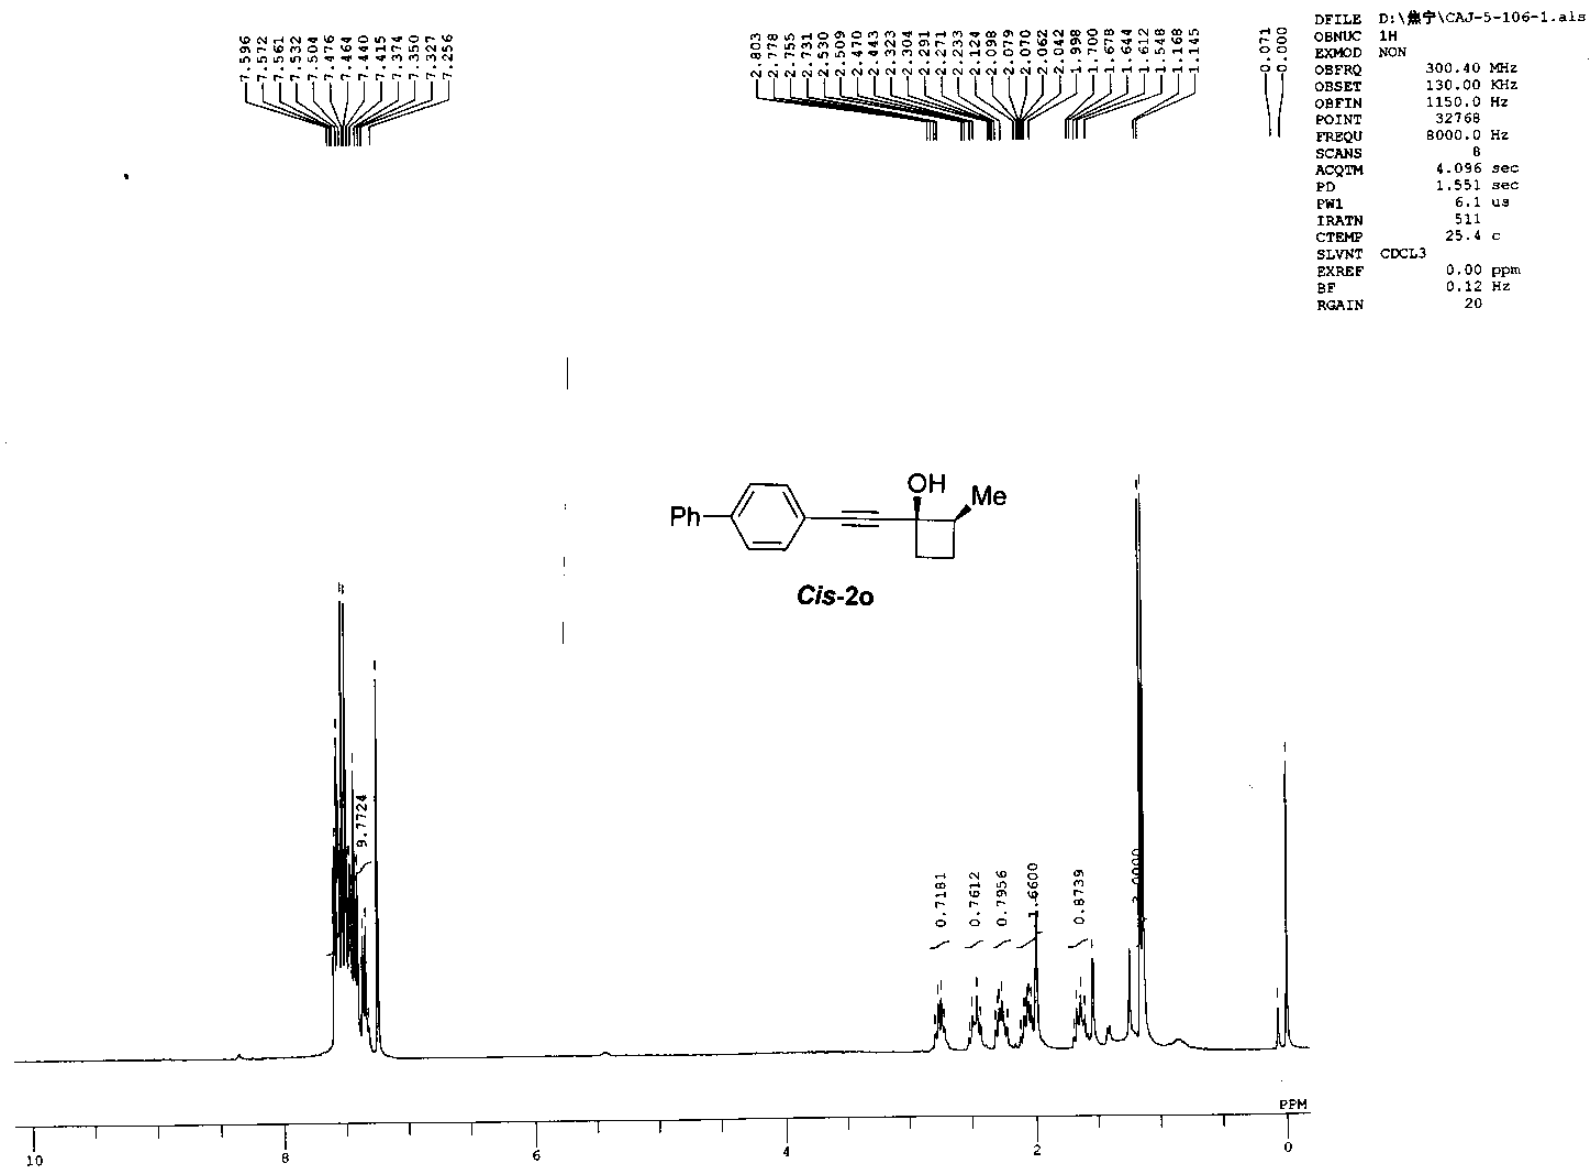



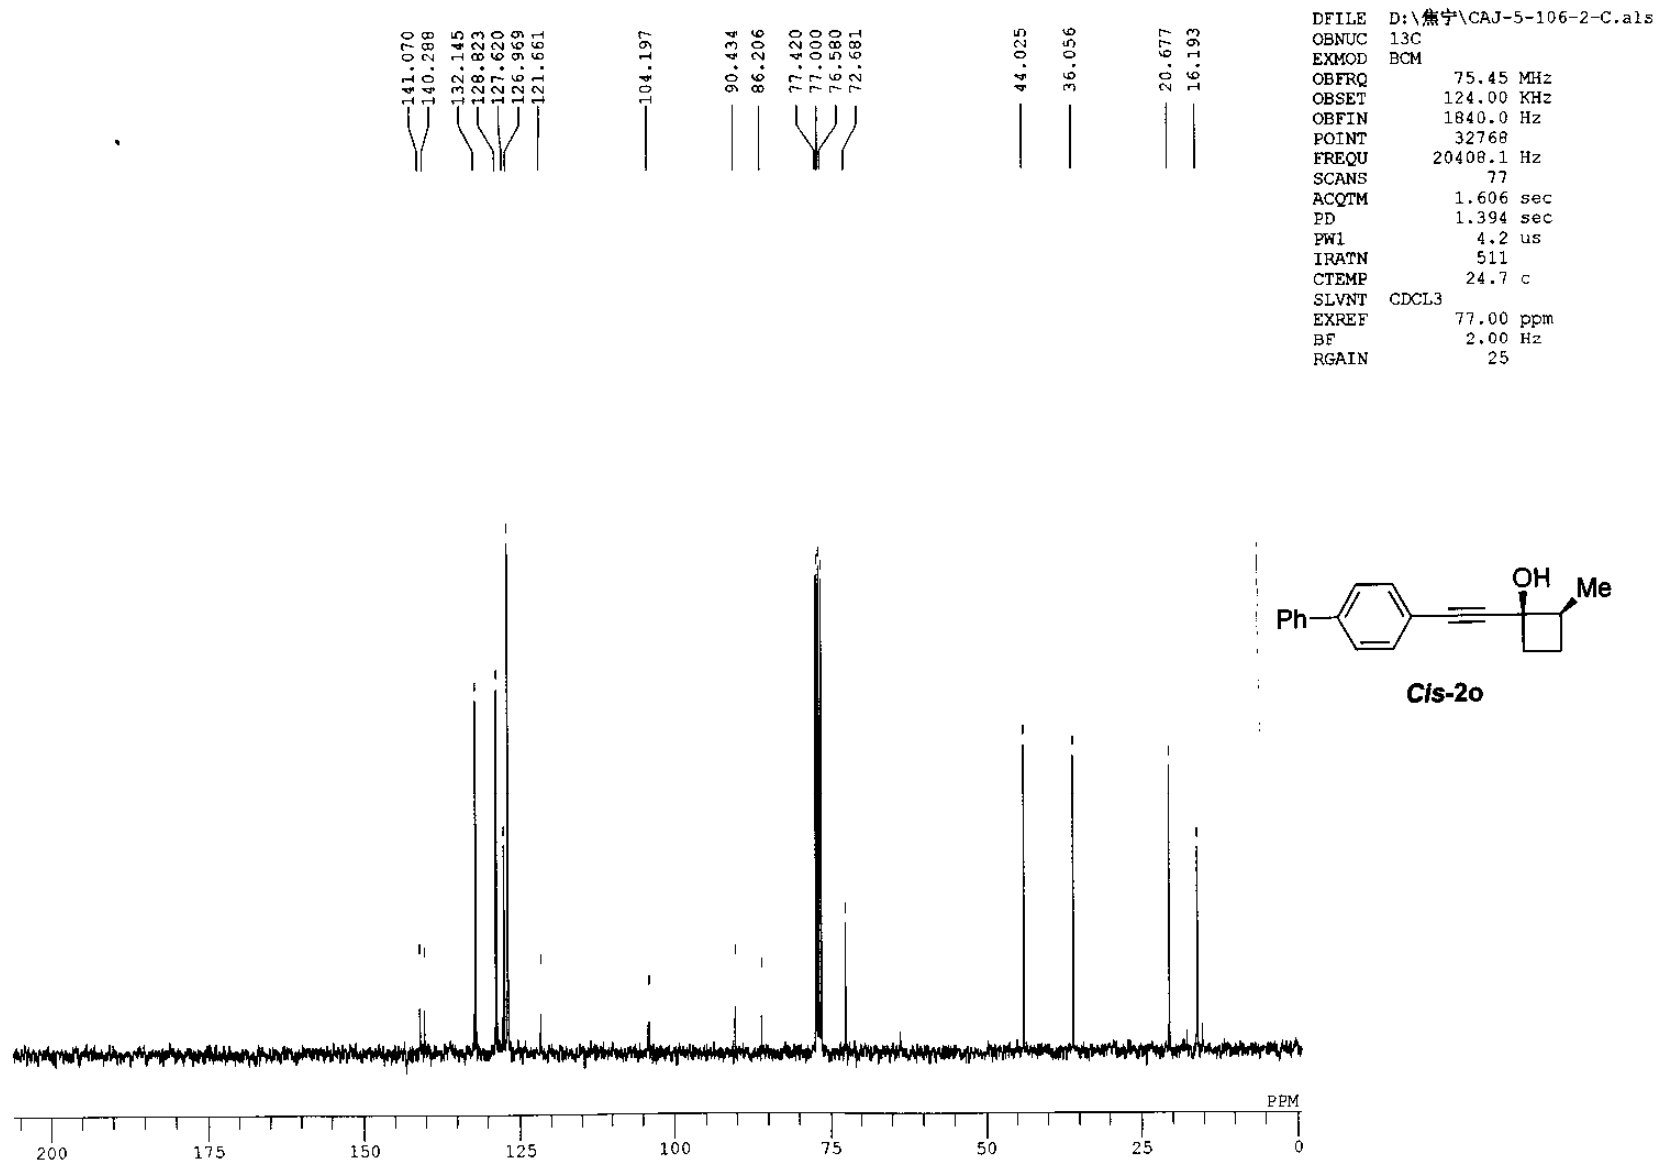

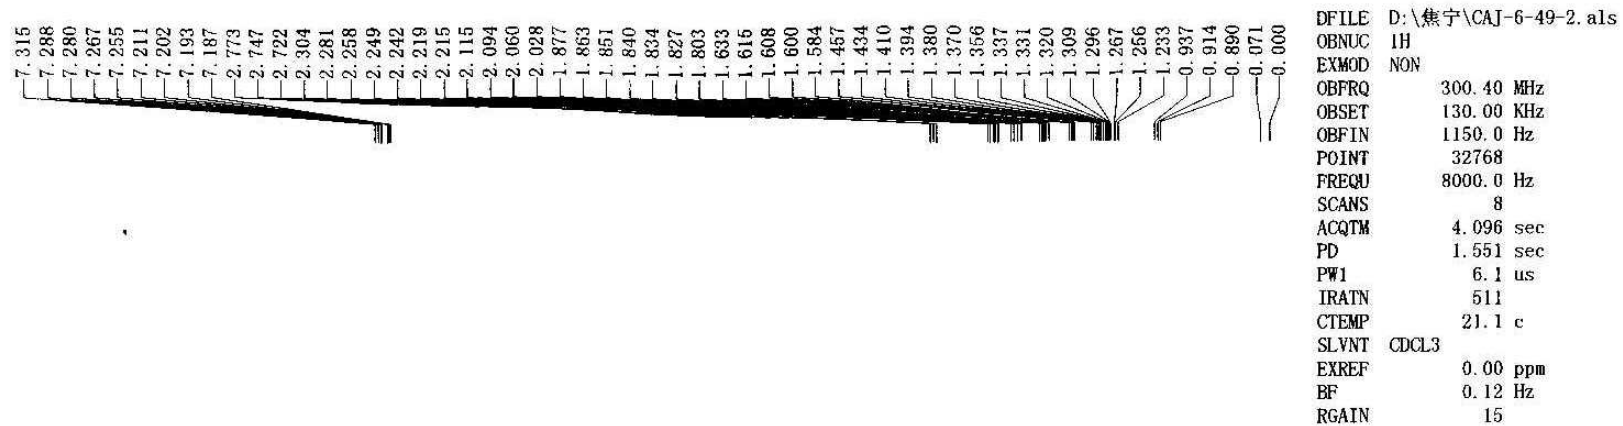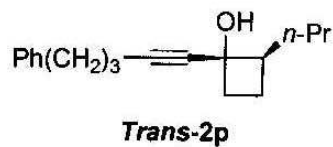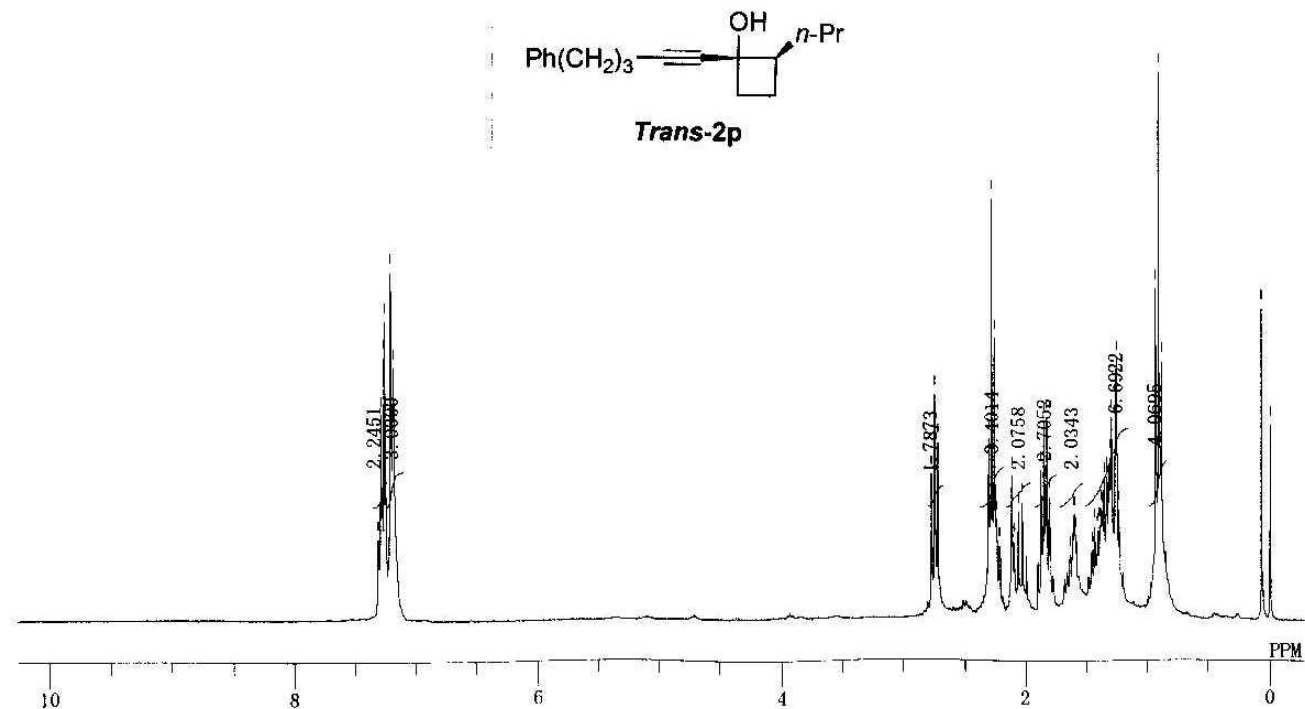

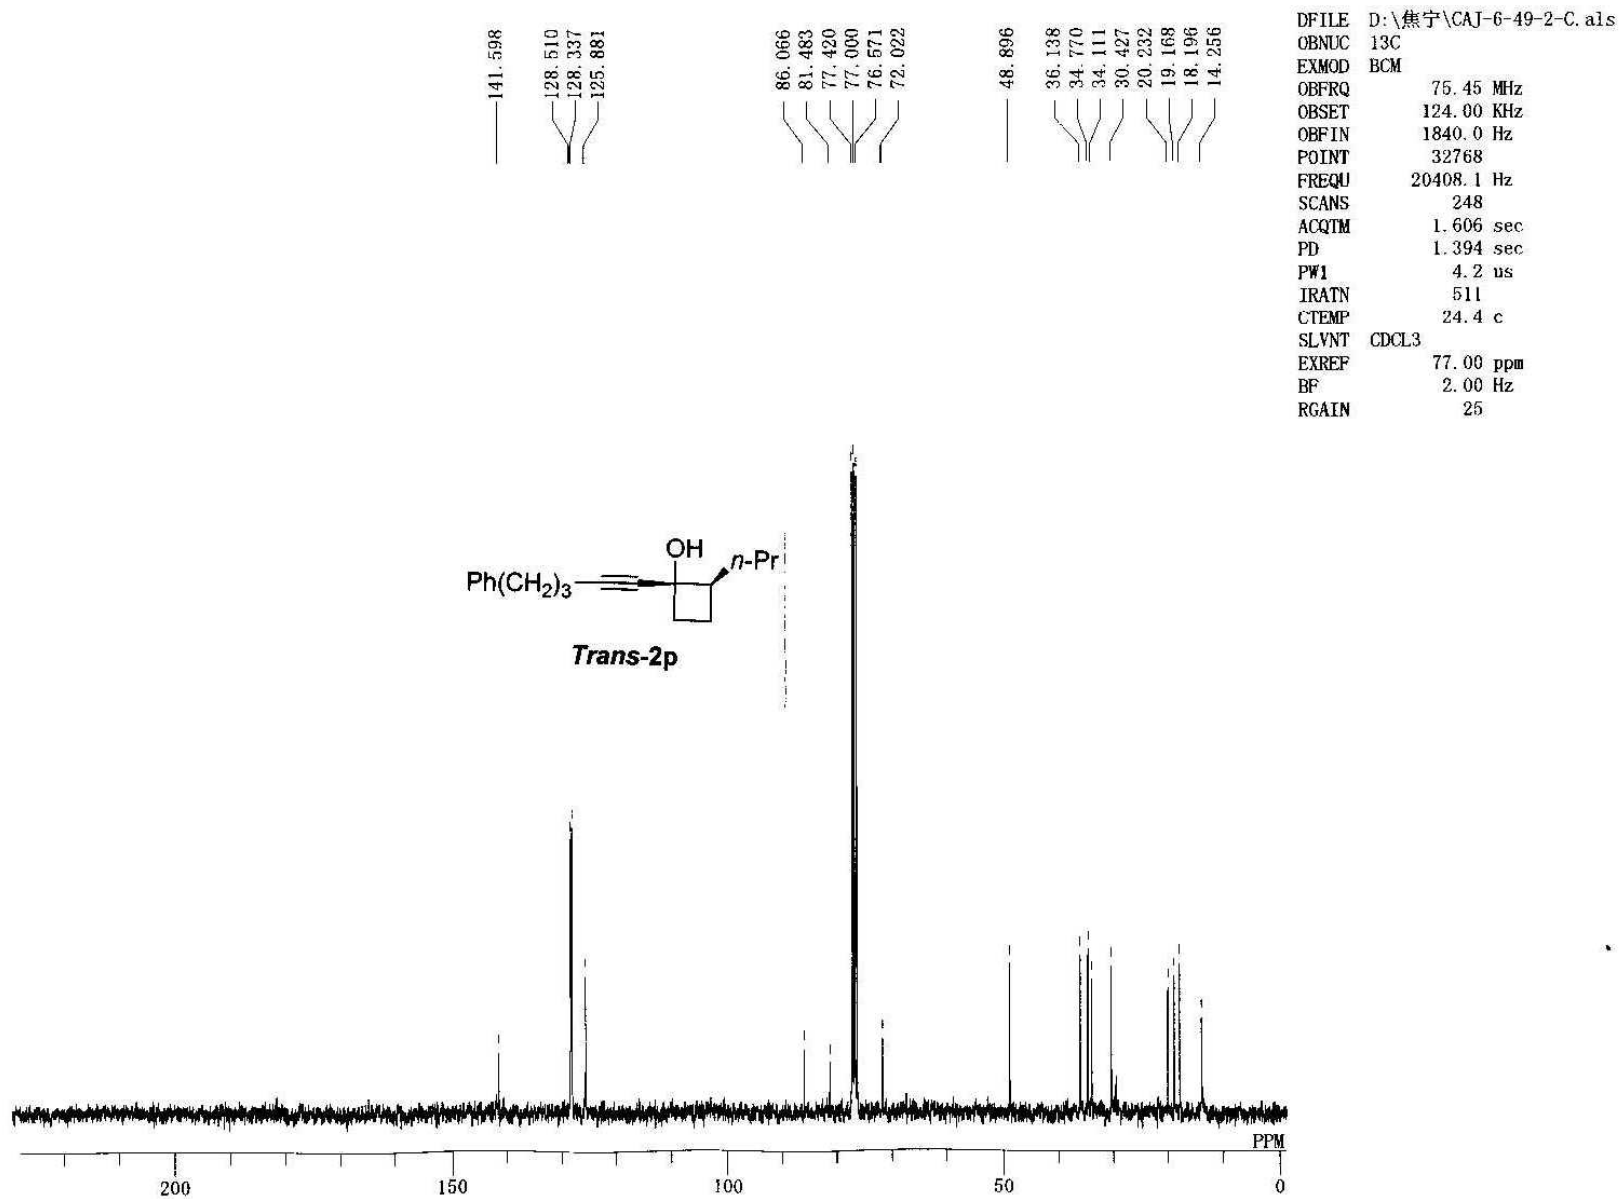

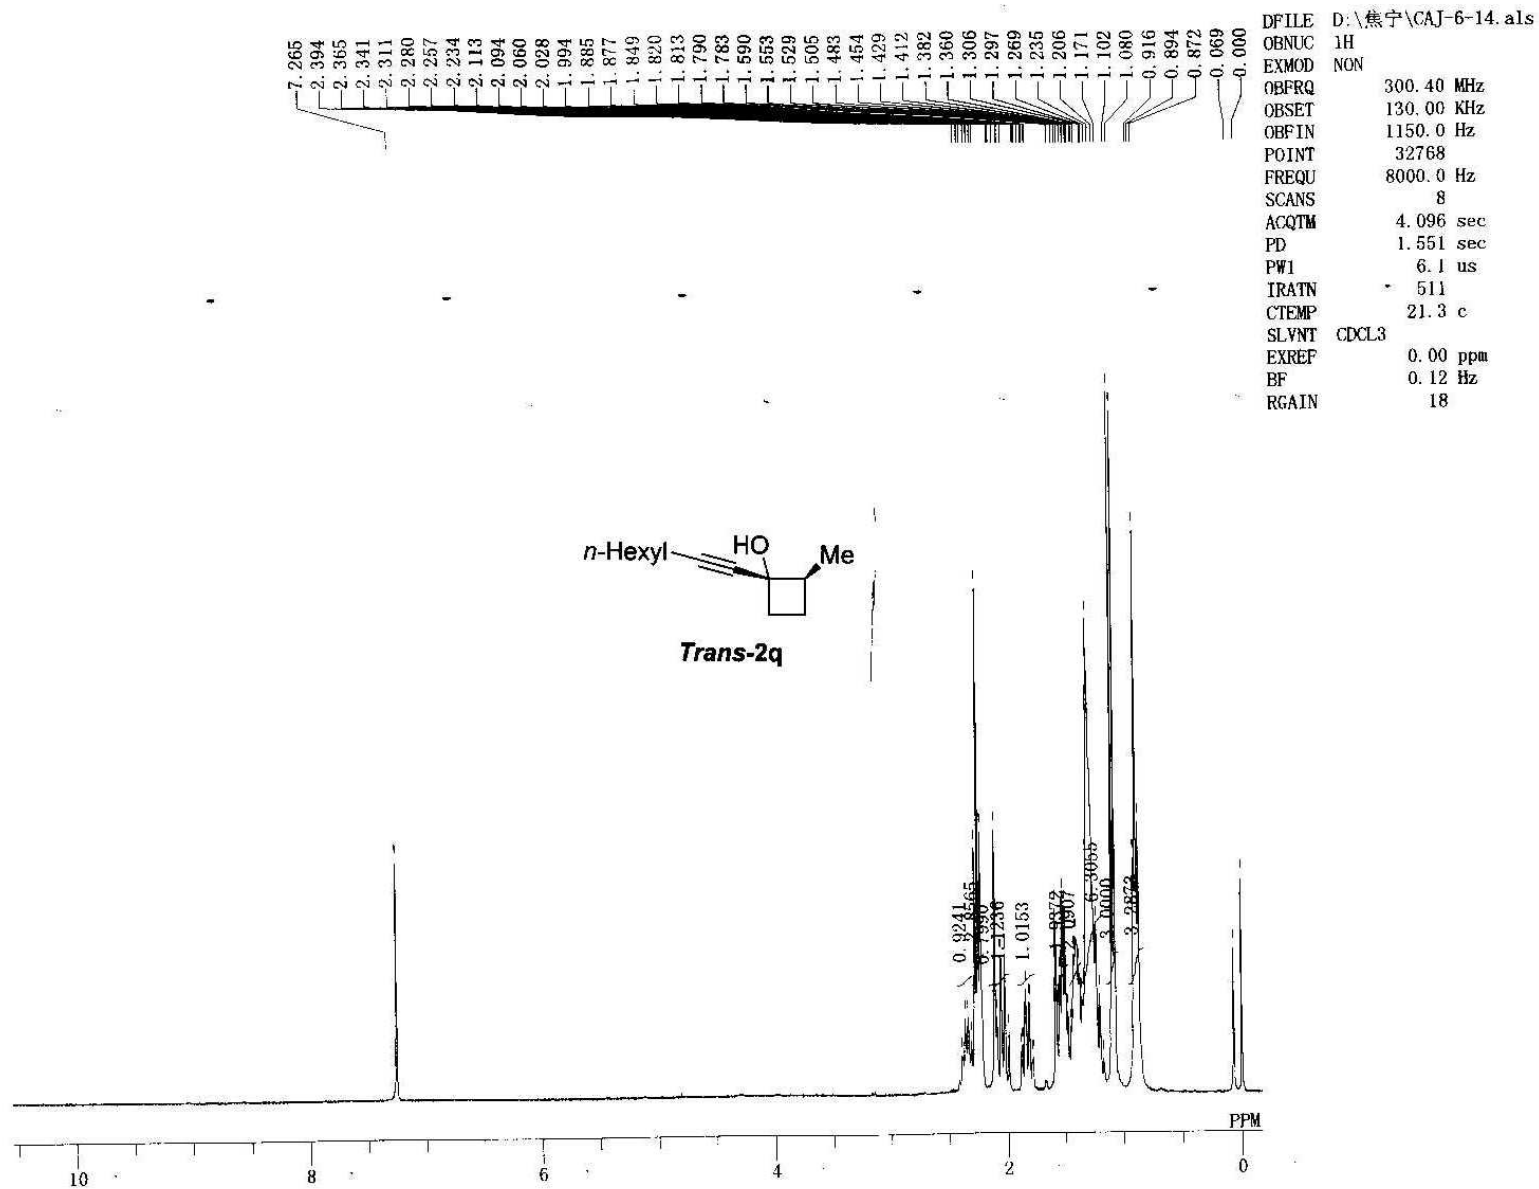

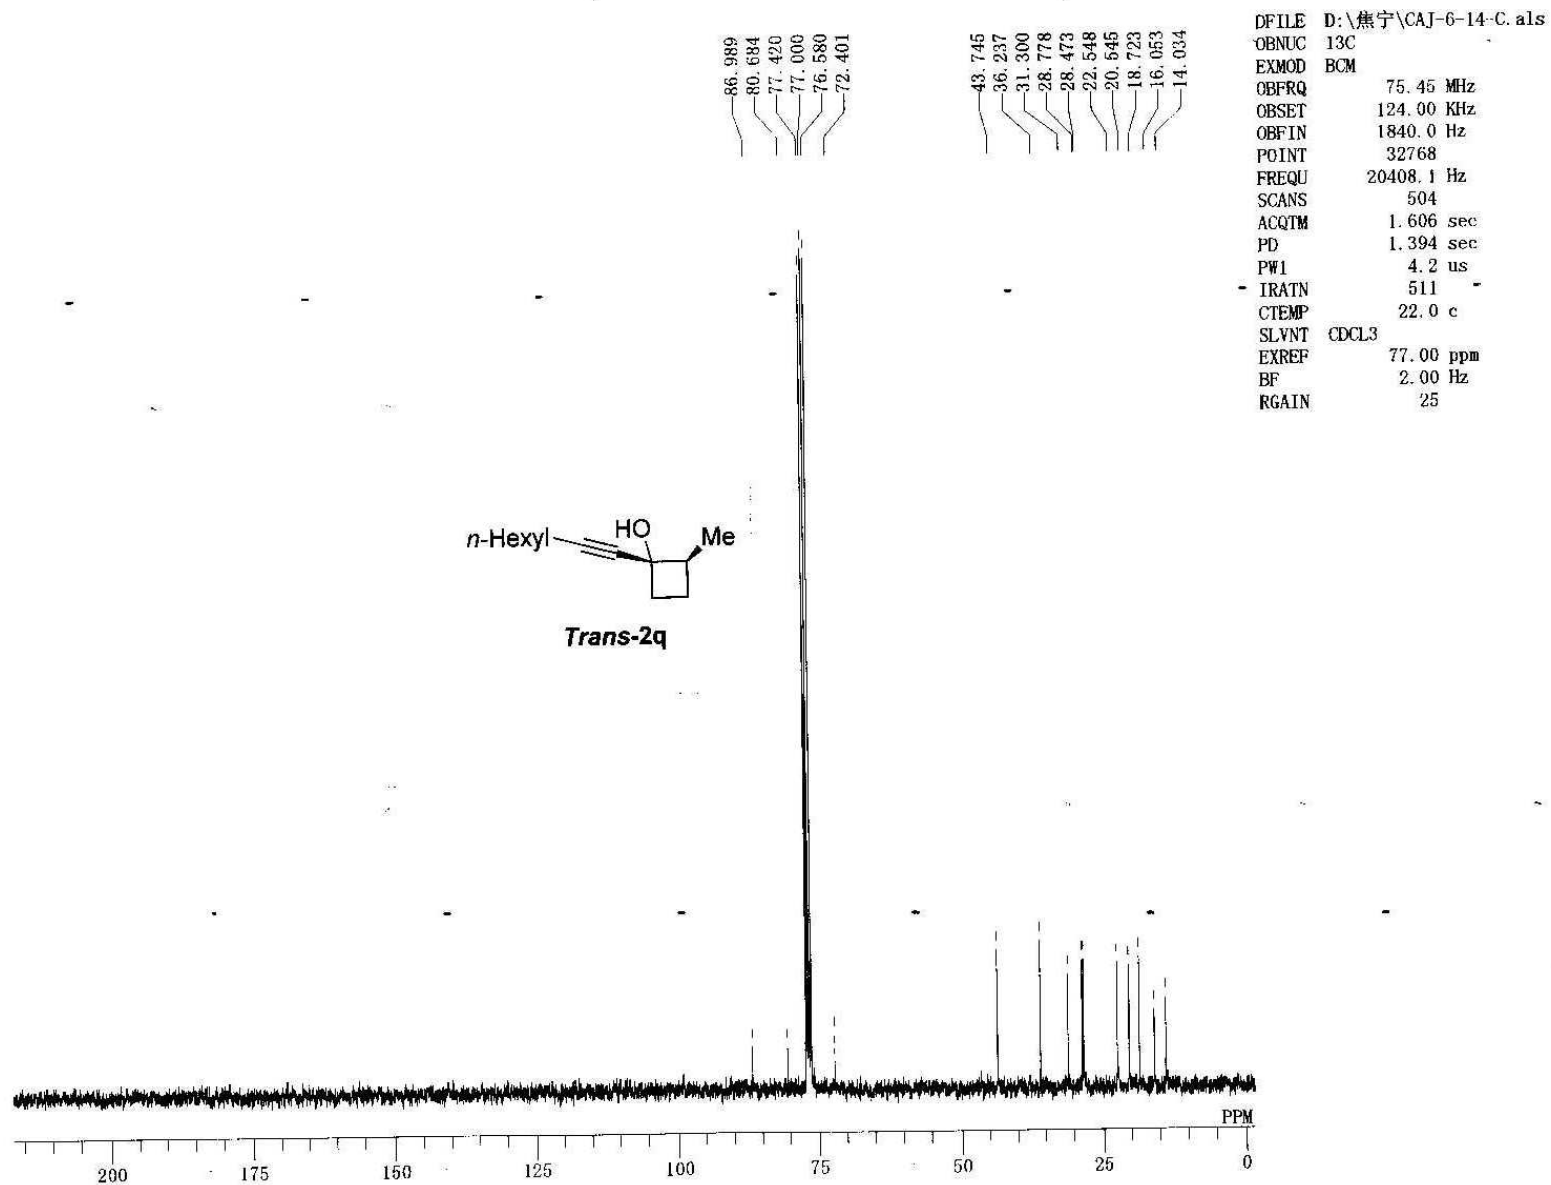

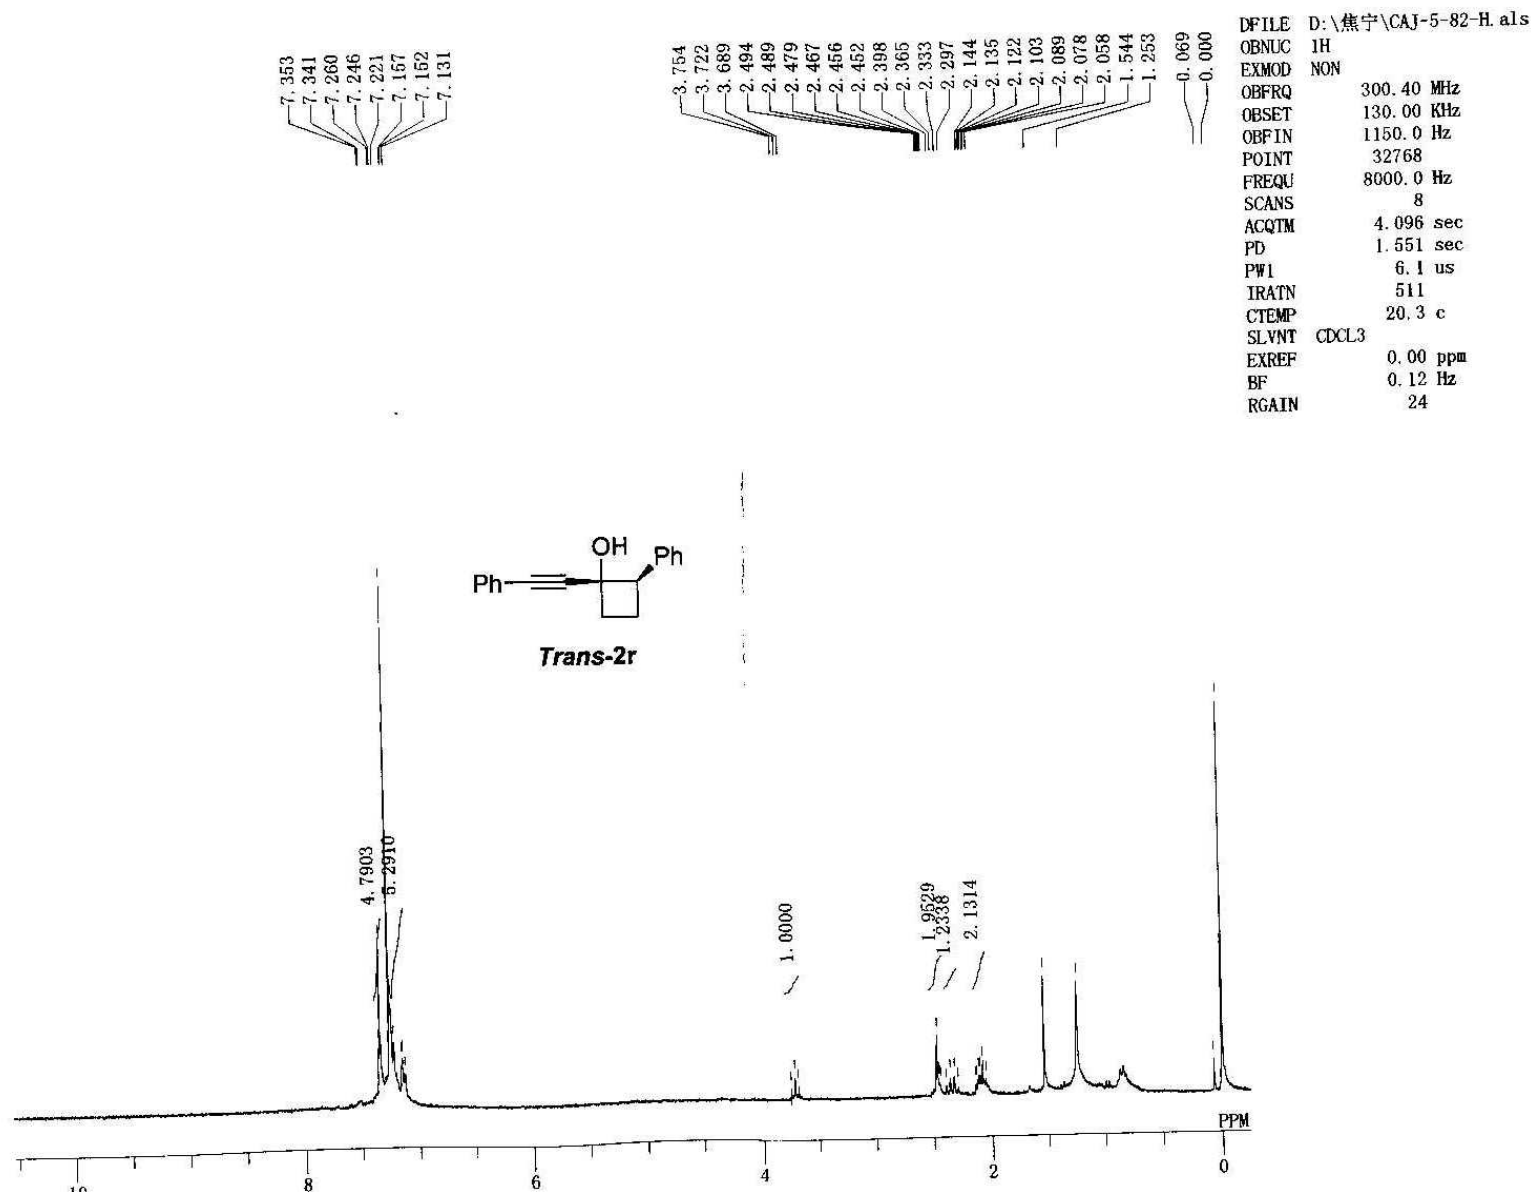

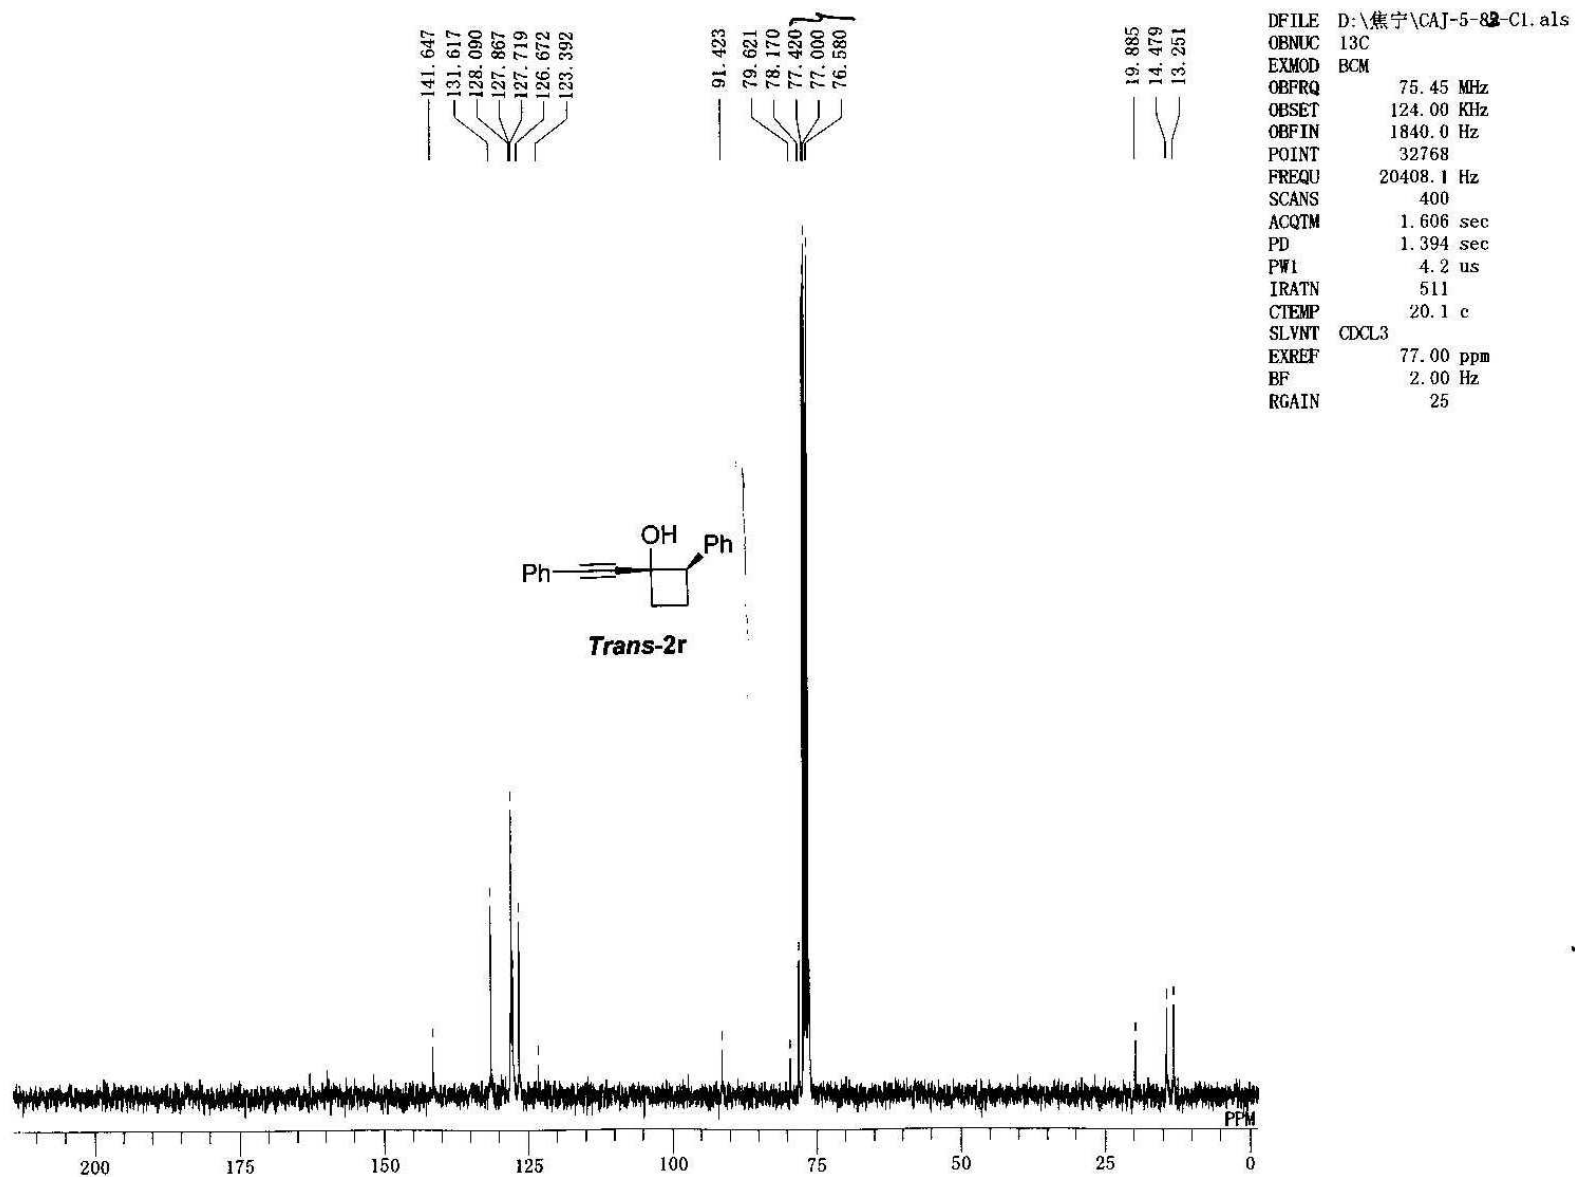

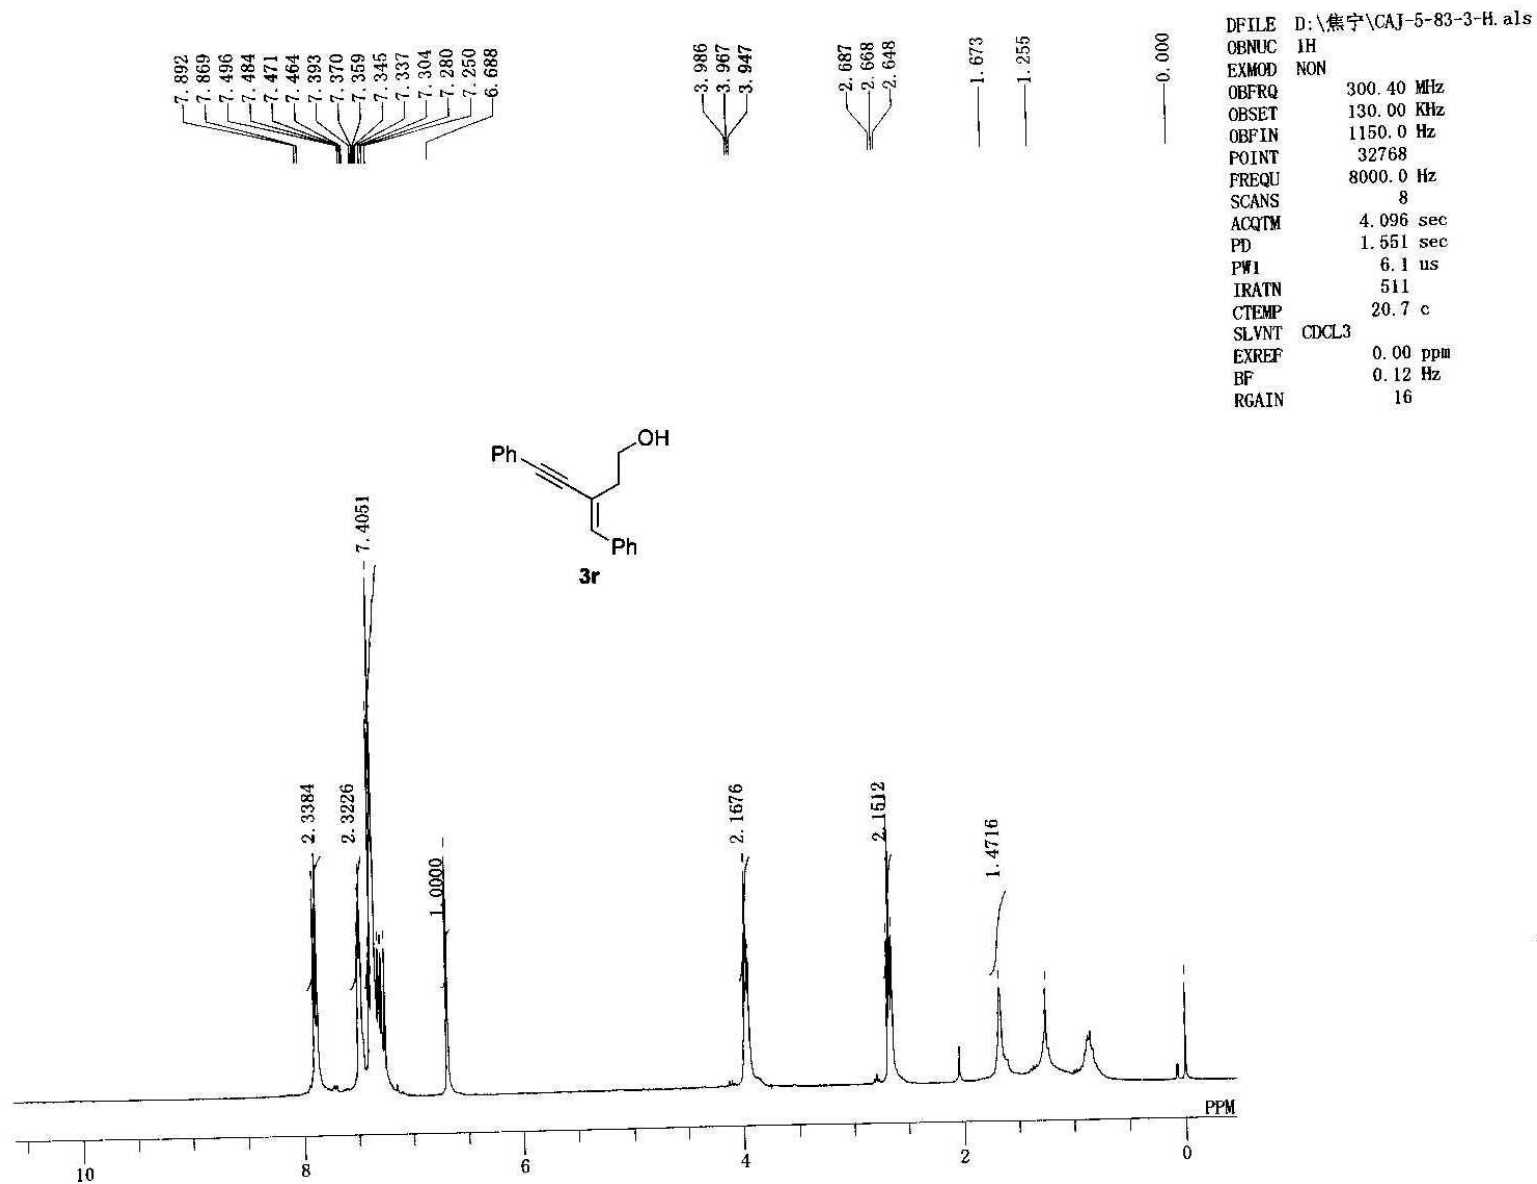



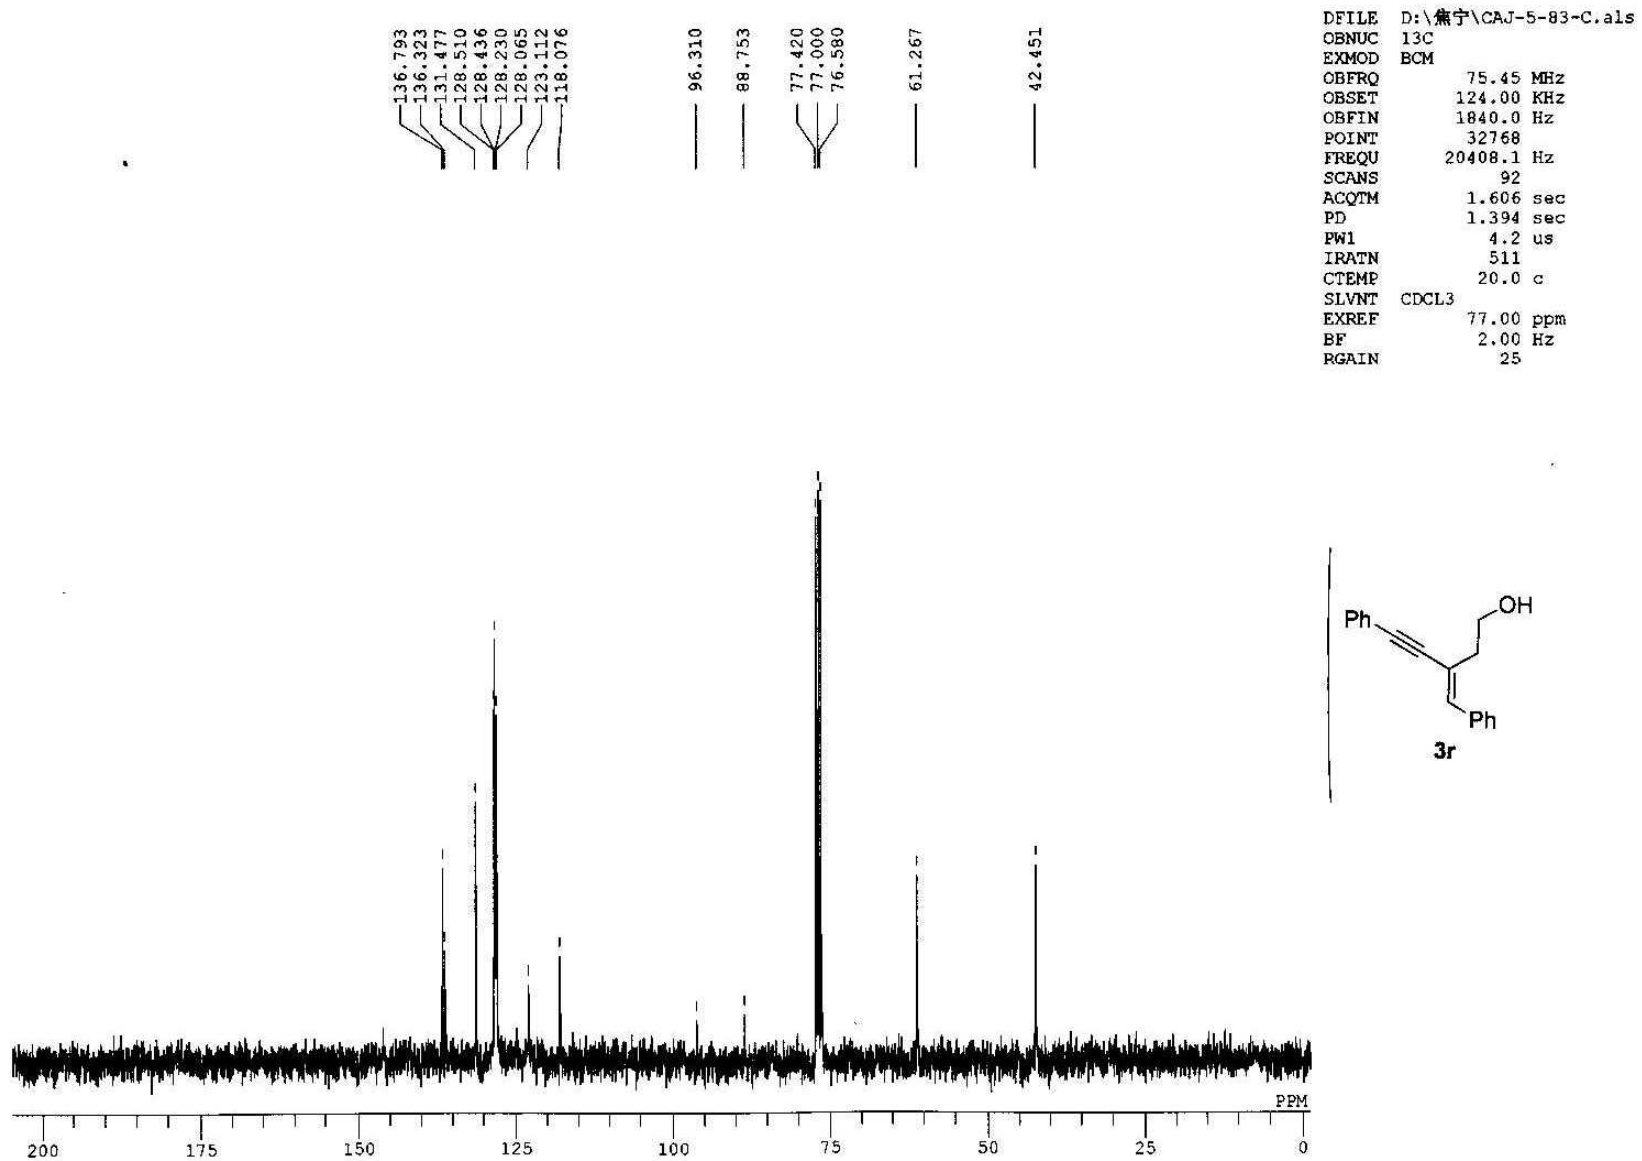

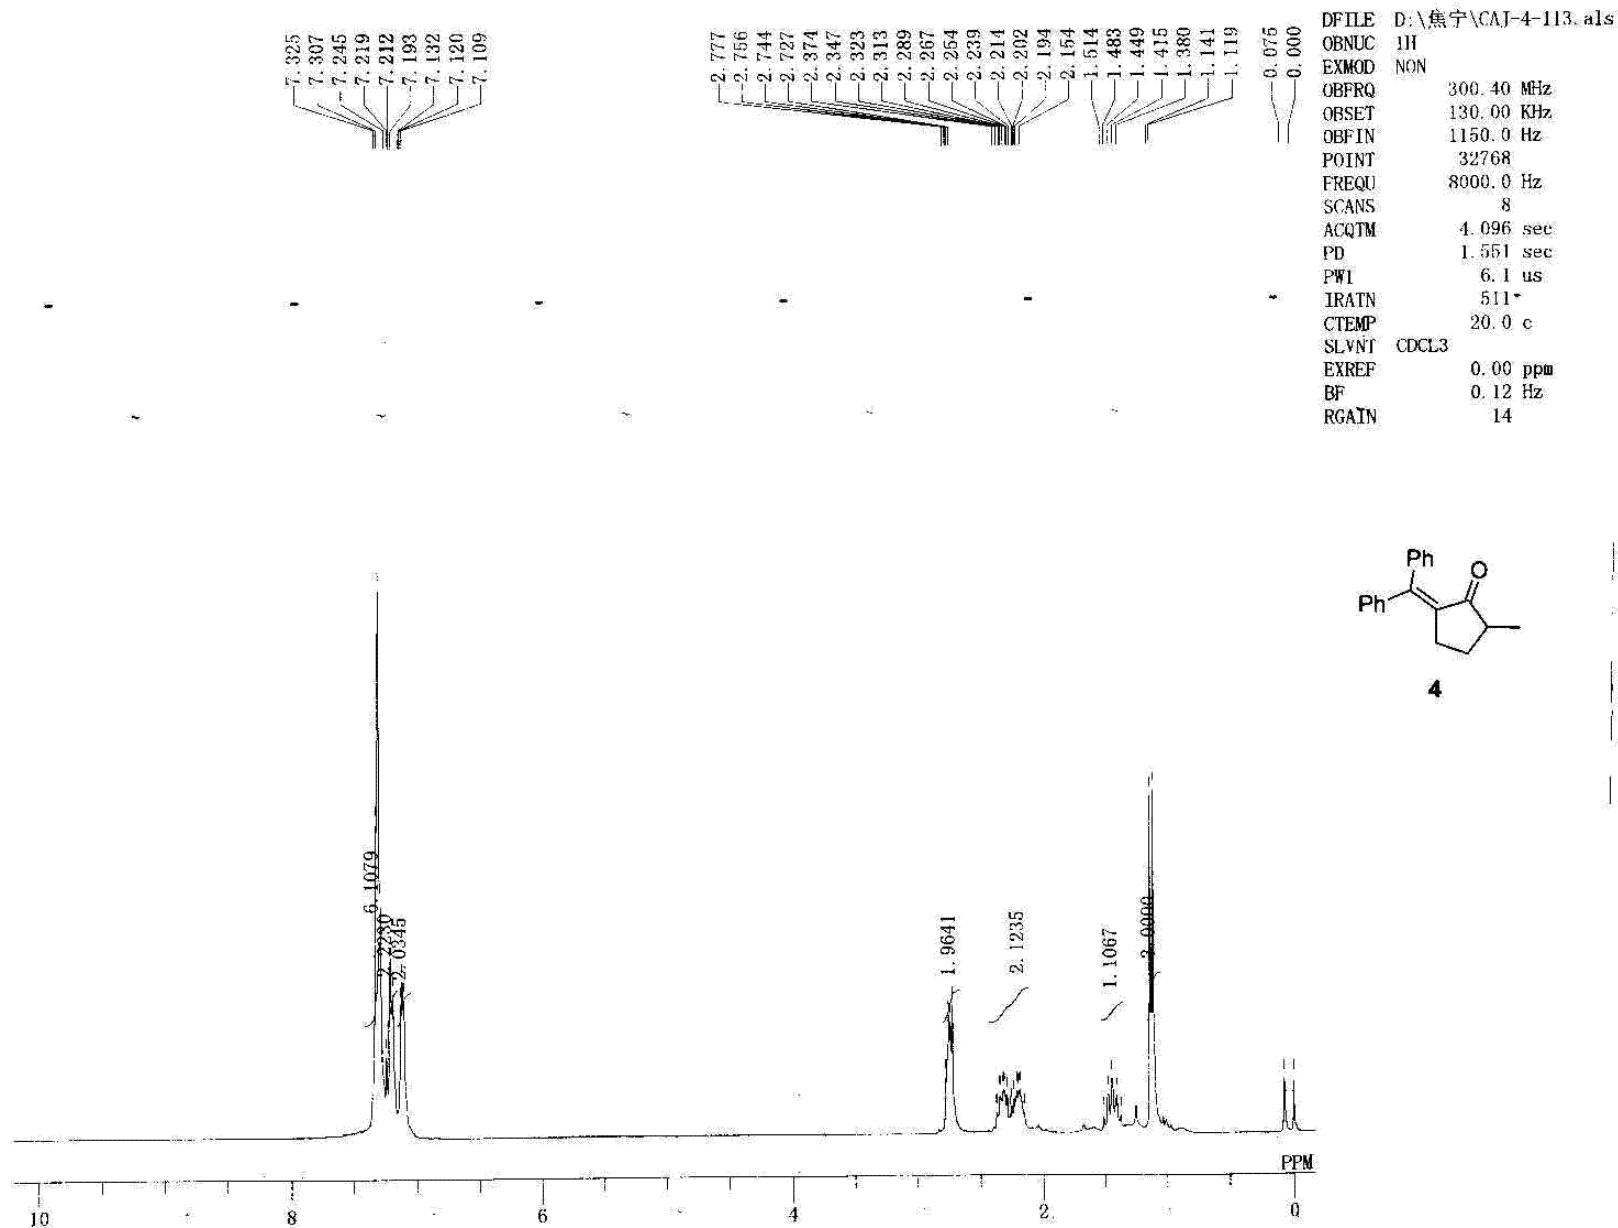

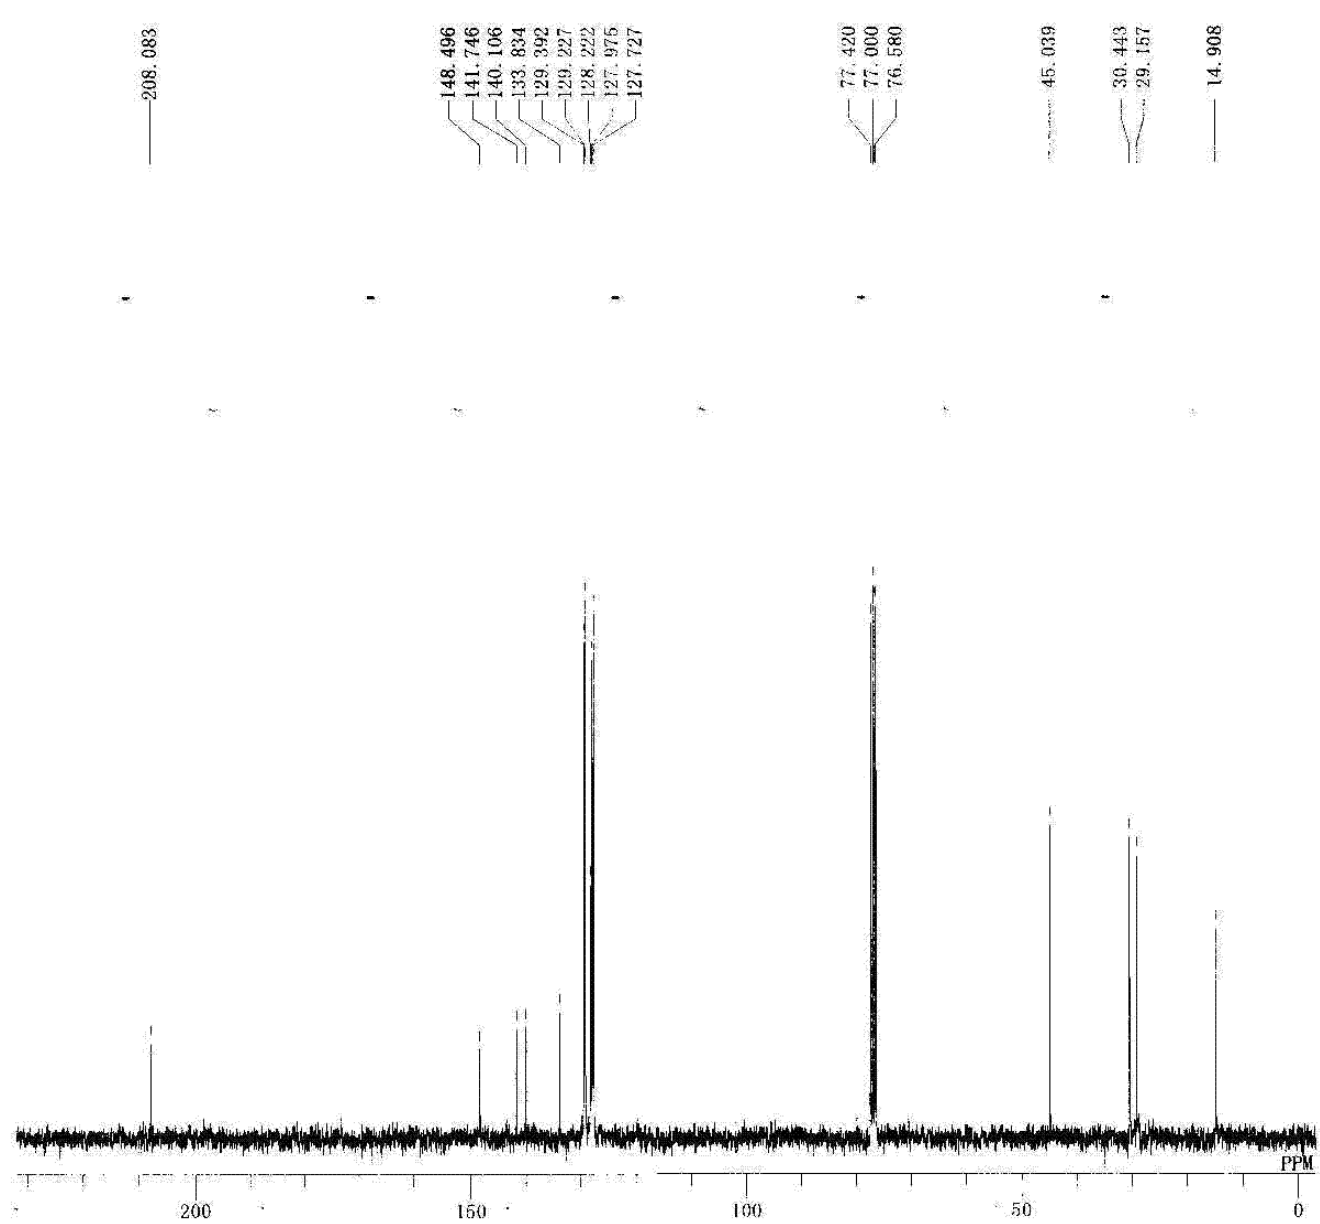

D\FILE D:\熊宁\CAJ-4-113-C.als  
OBNUC 13C  
EXMOD BCM  
OBFRQ 75.45 MHz  
OBSET 124.00 KHz  
OBFIN 1840.0 Hz  
POINT 32768  
FREQU 20408.1 Hz  
SCANS 84  
ACQTM 1.606 sec  
PD 1.394 sec  
PW1 4.2 us  
IRATN 511  
CTEMP 20.0 c  
SLVNT CDCL3  
EXREF 77.00 ppm  
BF 2.00 Hz  
RGAIN 25

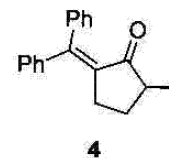

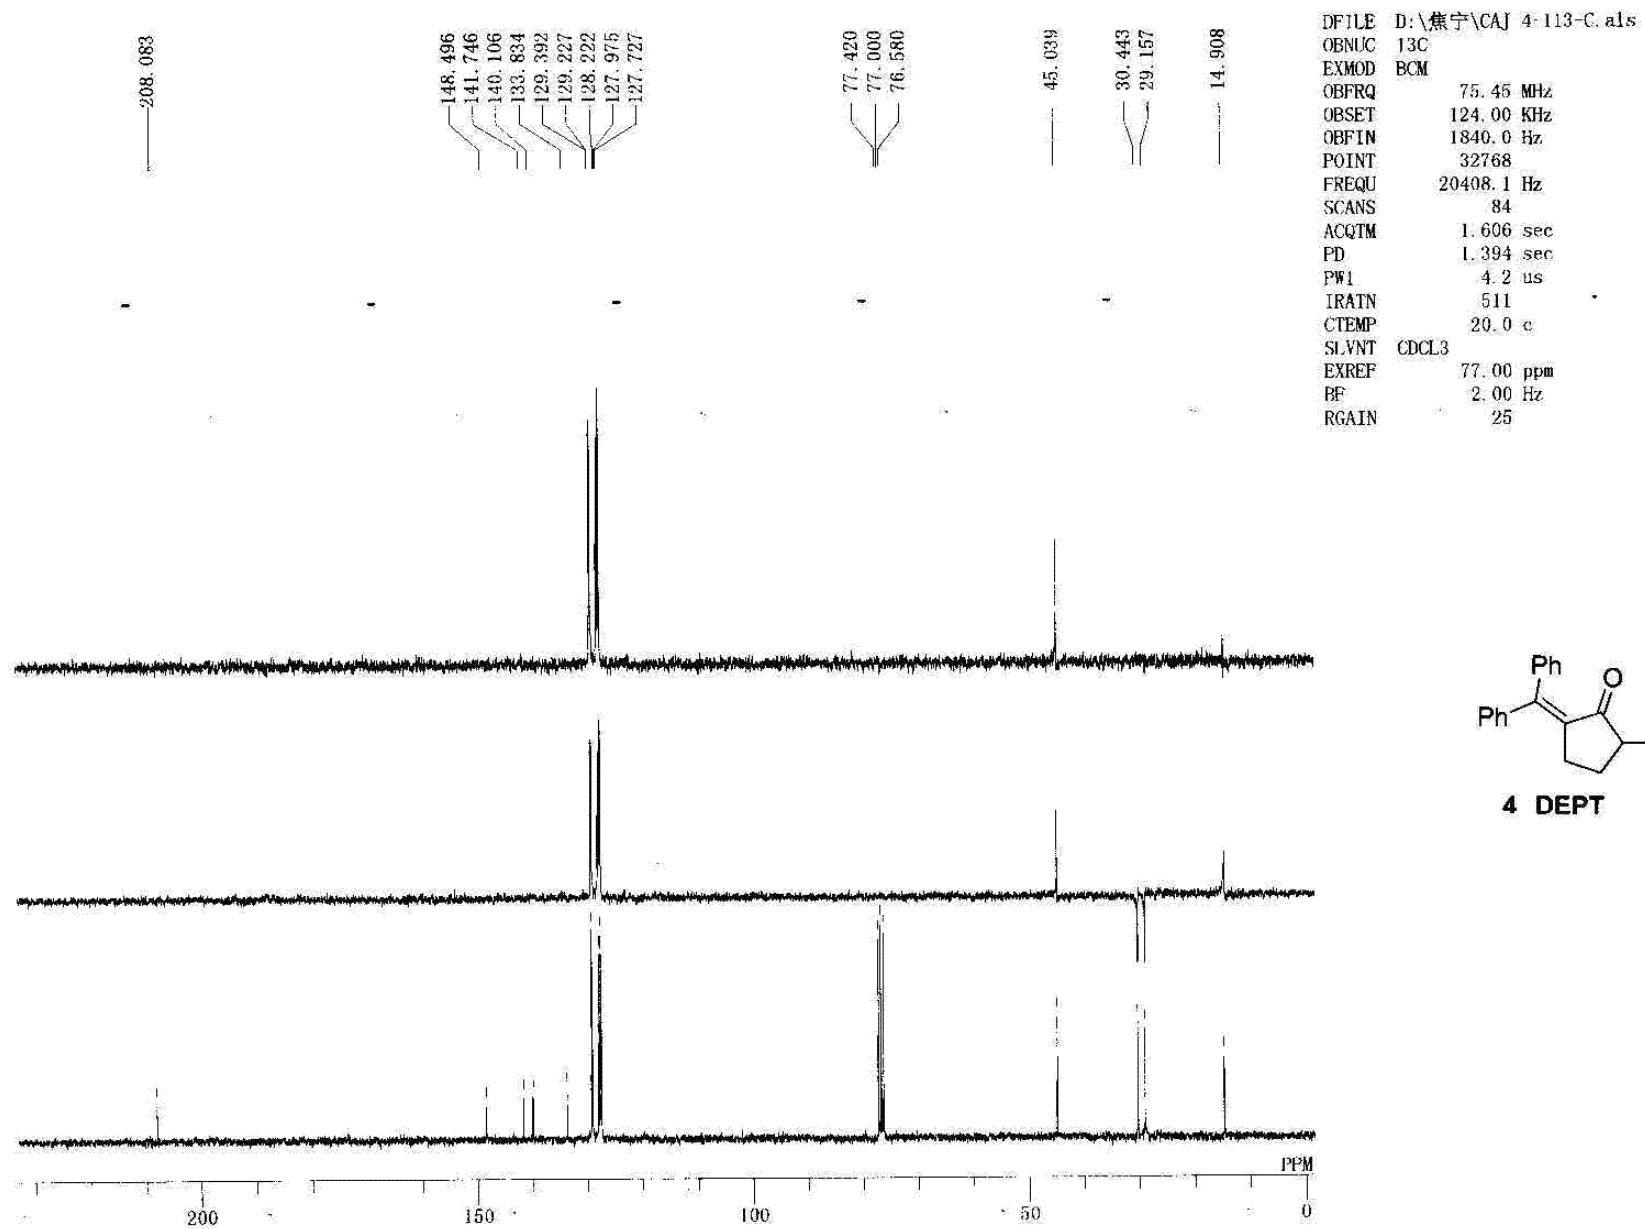

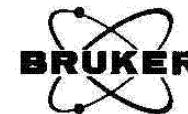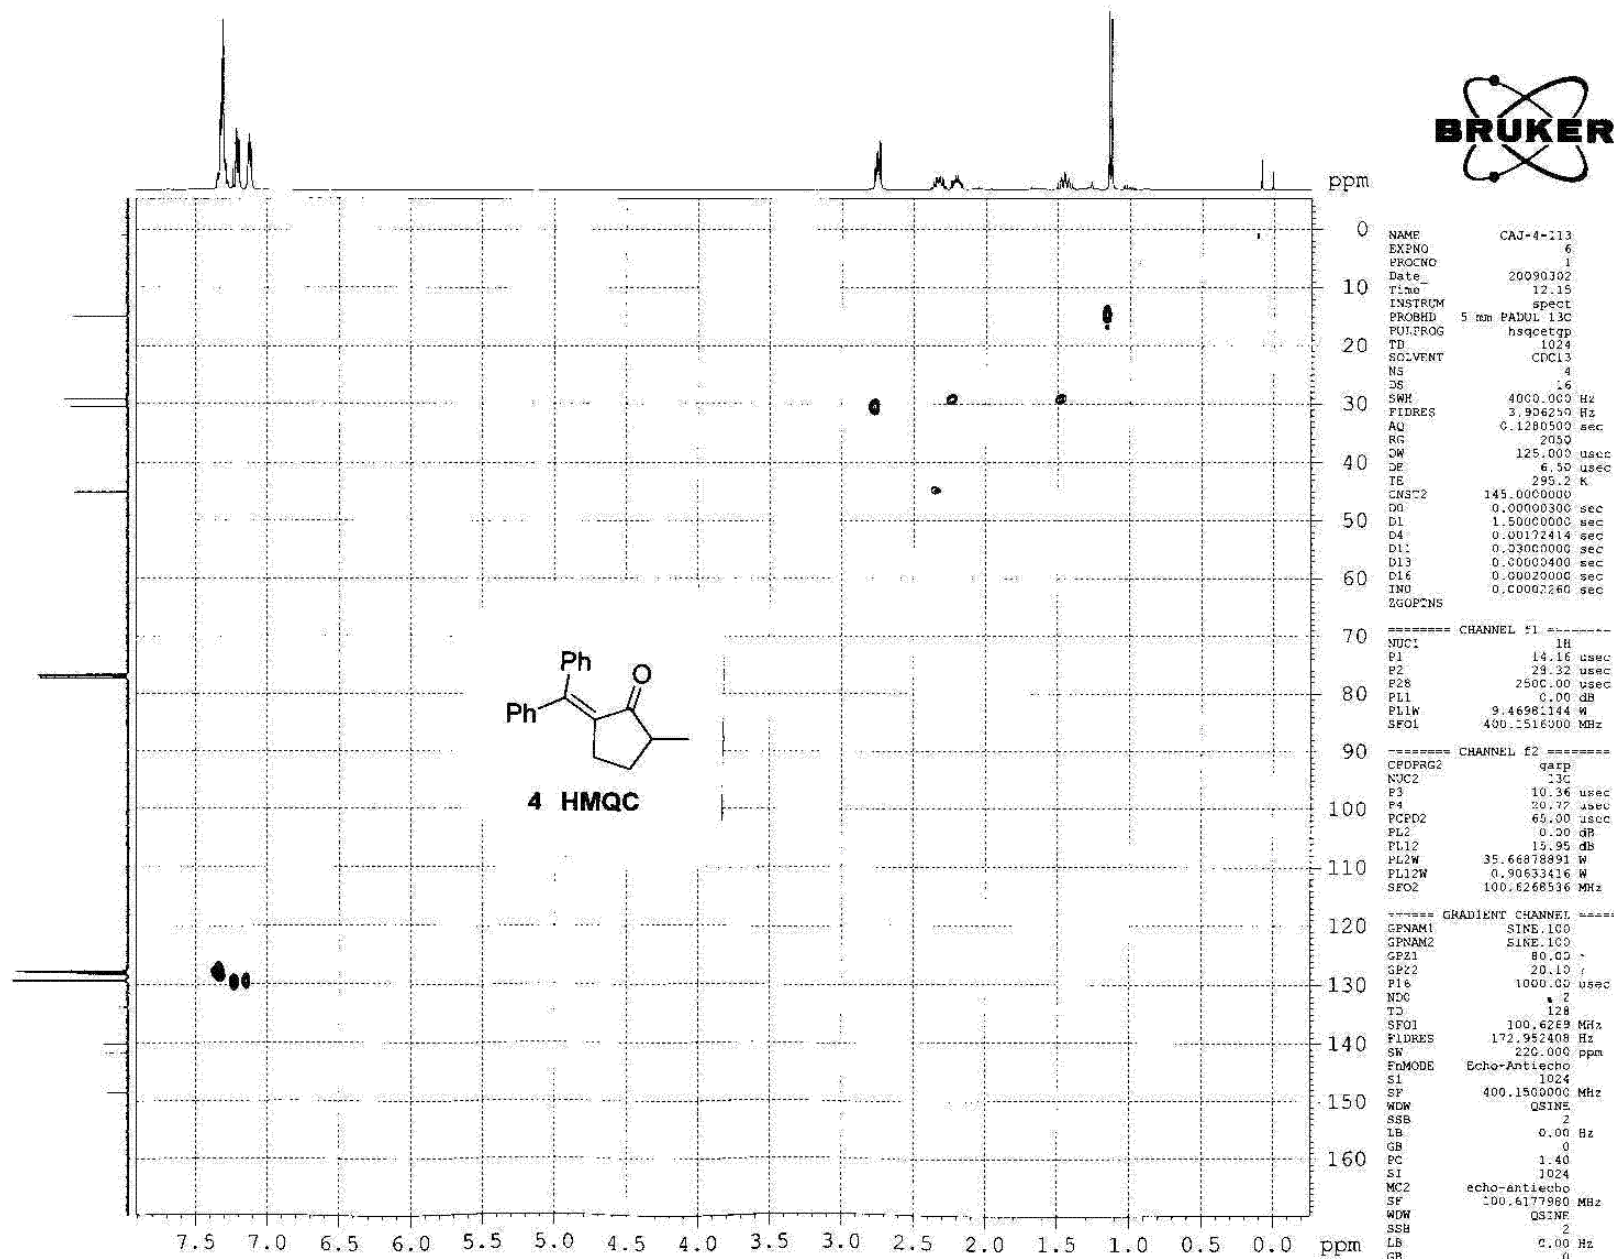

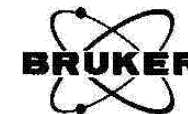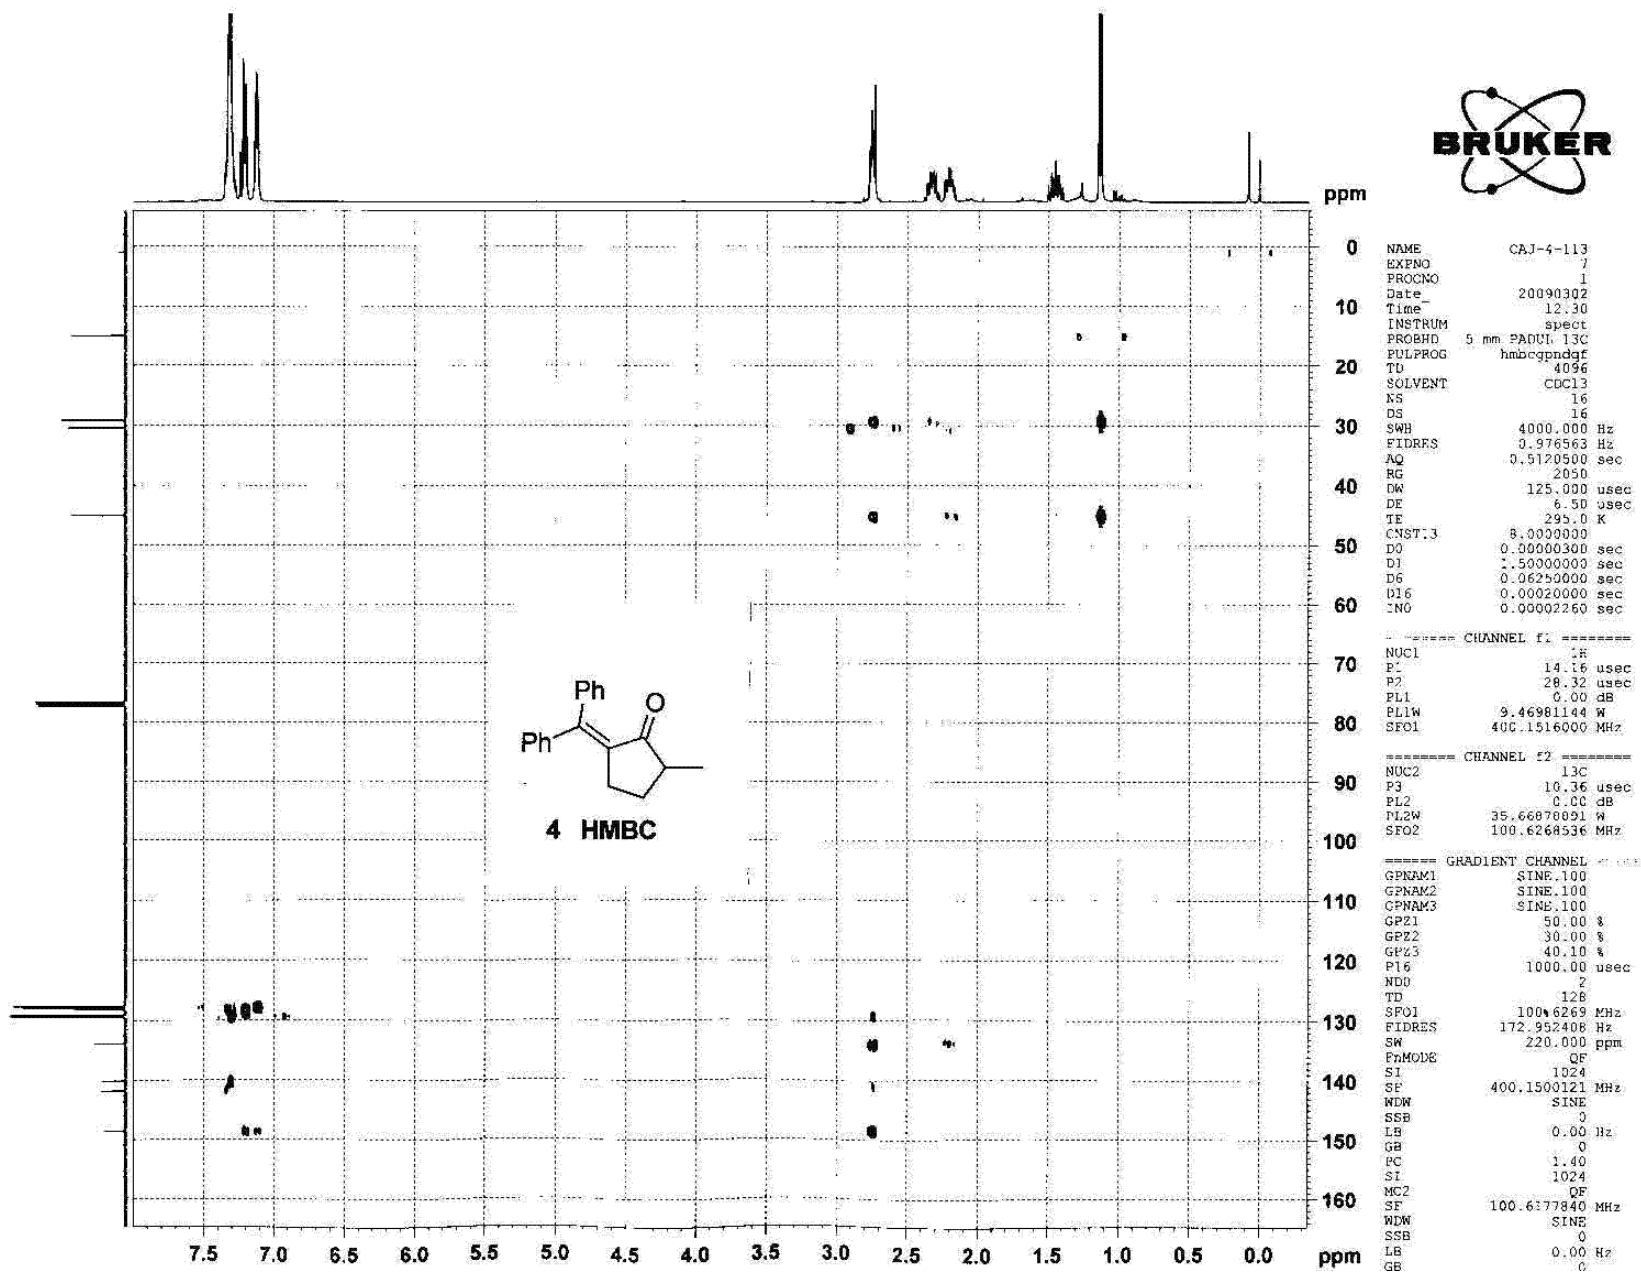

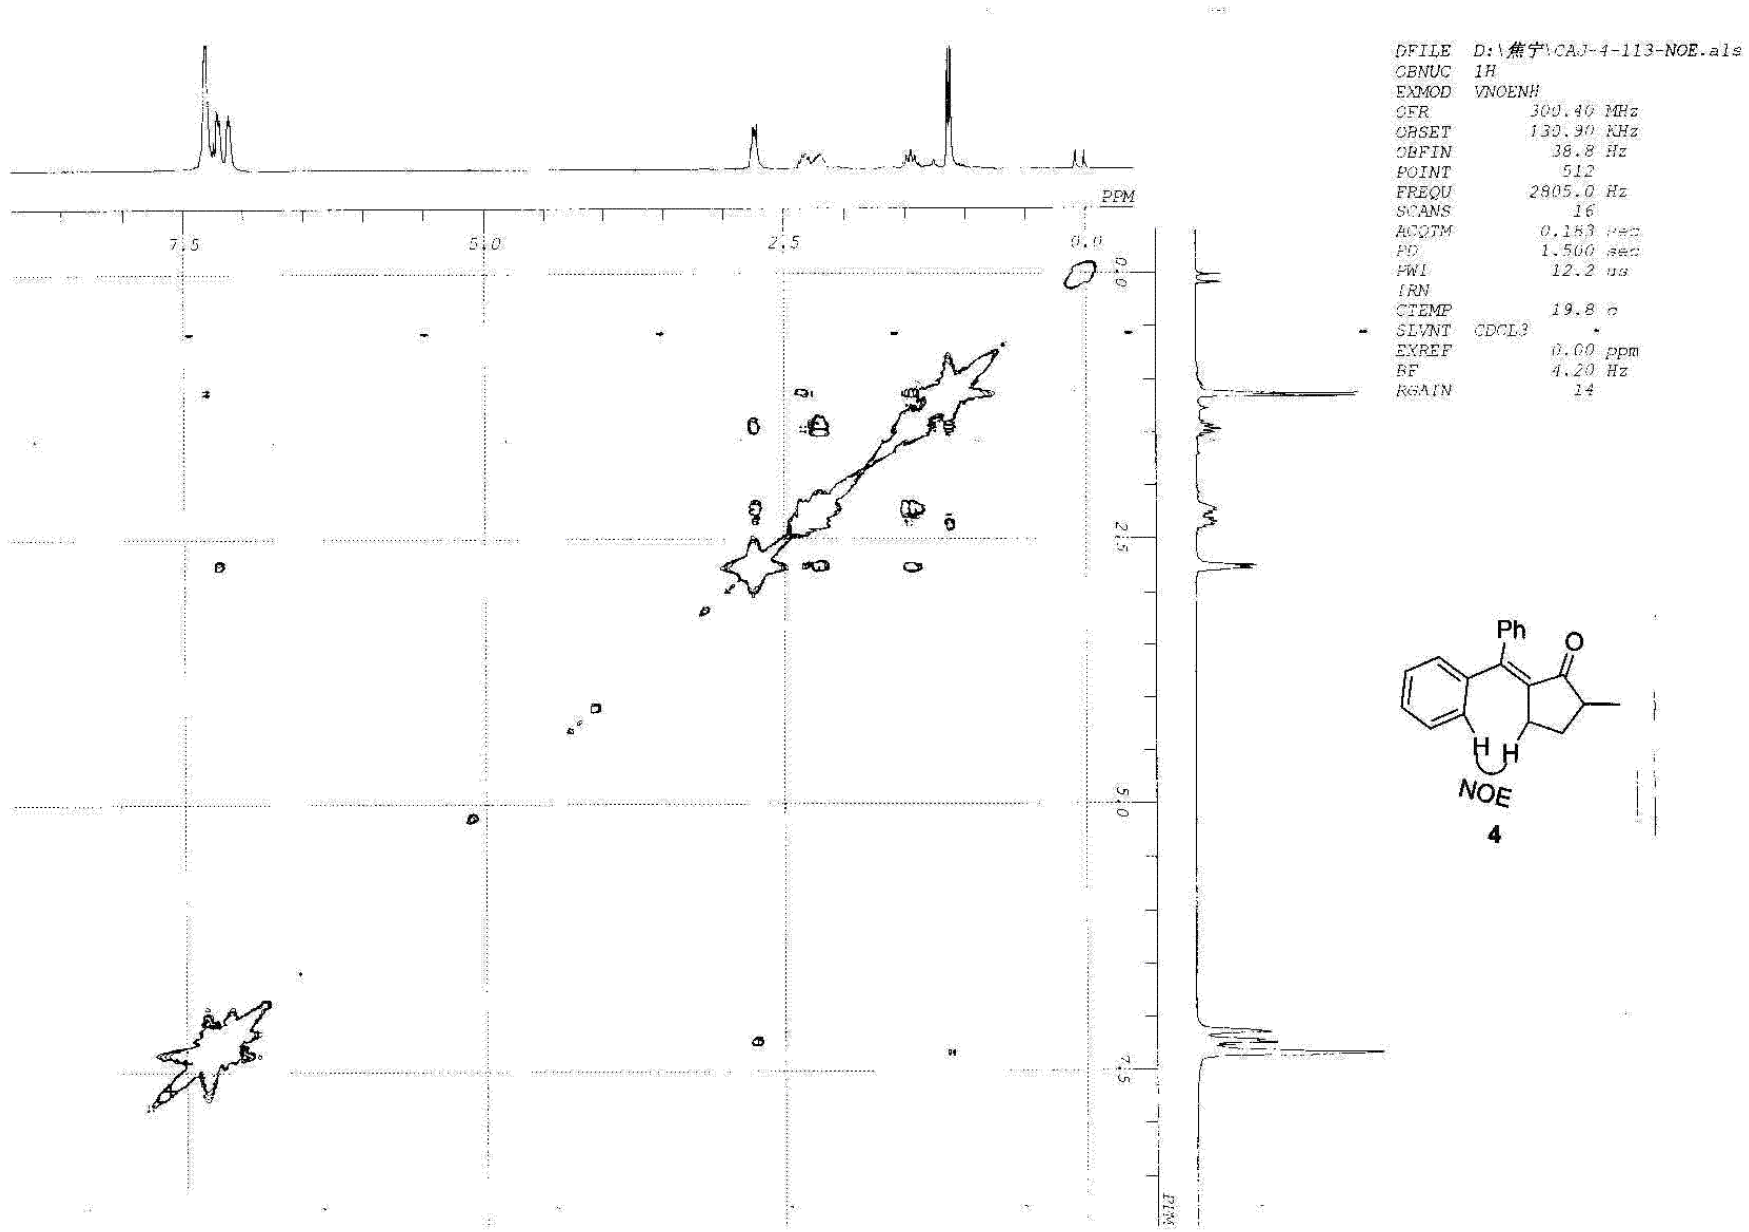

Supplement: b916623h.pdf [file b916623h.pdf]
